# Supplementary material for: Mechanisms underlying the enhanced biomass and abiotic stress tolerance phenotype of an Arabidopsis MIOX over‐expresser
Source: PubMed Central journal article supplement — Plant Direct. 2019 Sep 2;3(9):e00165. doi: 10.1002/pld3.165 (PMC6718051; doi:10.1002/pld3.165), 2019-09-02
Supplement: PLD3-3-e00165-s002.pdf [file PLD3-3-e00165-s002.pdf]

| test_id   | gene_id   | gene       | locus               | sample_1 | sample_2 | status |
|-----------|-----------|------------|---------------------|----------|----------|--------|
| AT3G29633 | AT3G29633 | -          | 3:11452941-11453037 | WT       | MIOX     | OK     |
| ATCG00100 | ATCG00100 | TRNG.1     | Pt:8645-9431        | WT       | MIOX     | OK     |
| AT1G32385 | AT1G32385 | -          | 1:11685059-11685144 | WT       | MIOX     | OK     |
| AT3G14452 | AT3G14452 | -          | 3:4851695-4851812   | WT       | MIOX     | OK     |
| AT1G20015 | AT1G20015 | -          | 1:6941284-6941373   | WT       | MIOX     | OK     |
| AT3G63375 | AT3G63375 | MIR167B    | 3:23406176-23406267 | WT       | MIOX     | OK     |
| AT2G46685 | AT2G46685 | MIR166A    | 2:19176125-19176261 | WT       | MIOX     | OK     |
| AT2G10606 | AT2G10606 | MIR396A    | 2:4142322-4142473   | WT       | MIOX     | OK     |
| AT4G16240 | AT4G16240 | -          | 4:9192335-9192568   | WT       | MIOX     | OK     |
| AT4G16215 | AT4G16215 | -          | 4:9179243-9179833   | WT       | MIOX     | OK     |
| AT1G64195 | AT1G64195 | -          | 1:23827710-23828048 | WT       | MIOX     | OK     |
| AT3G15534 | AT3G15534 | -          | 3:5258875-5259082   | WT       | MIOX     | OK     |
| AT5G22430 | AT5G22430 | -          | 5:7433789-7434935   | WT       | MIOX     | OK     |
| AT4G22513 | AT4G22513 | -          | 4:11854808-11857313 | WT       | MIOX     | OK     |
| AT3G51590 | AT3G51590 | LTP12      | 3:19135664-19136675 | WT       | MIOX     | OK     |
| AT4G28395 | AT4G28395 | ATA7       | 4:14043939-14044902 | WT       | MIOX     | OK     |
| AT1G68875 | AT1G68875 | -          | 1:25892085-25892798 | WT       | MIOX     | OK     |
| AT1G67990 | AT1G67990 | TSM1       | 1:25489454-25490867 | WT       | MIOX     | OK     |
| AT3G05727 | AT3G05727 | -          | 3:1693551-1694138   | WT       | MIOX     | OK     |
| AT4G14743 | AT4G14743 | -          | 4:8458473-8458755   | WT       | MIOX     | OK     |
| AT5G01870 | AT5G01870 | LTP10      | 5:337176-337820     | WT       | MIOX     | OK     |
| AT1G68526 | AT1G68526 | -          | 1:25711868-25712238 | WT       | MIOX     | OK     |
| AT4G11911 | AT4G11911 | -          | 4:7158149-7159440   | WT       | MIOX     | OK     |
| AT3G56705 | AT3G56705 | U2.6       | 3:21004258-21004809 | WT       | MIOX     | OK     |
| AT1G66850 | AT1G66850 | -          | 1:24936957-24937434 | WT       | MIOX     | OK     |
| AT5G44620 | AT5G44620 | CYP706A3   | 5:17997778-17999558 | WT       | MIOX     | OK     |
| AT1G75940 | AT1G75940 | BGLU20     | 1:28511167-28514284 | WT       | MIOX     | OK     |
| AT5G41090 | AT5G41090 | anac095    | 5:16445763-16446537 | WT       | MIOX     | OK     |
| AT5G53740 | AT5G53740 | -          | 5:21811632-21814908 | WT       | MIOX     | OK     |
| AT4G26260 | AT4G26260 | MIOX4      | 4:13297697-13300387 | WT       | MIOX     | OK     |
| AT3G42658 | AT3G42658 | SADHU3-2   | 3:14749399-14750294 | WT       | MIOX     | OK     |
| AT1G43800 | AT1G43800 | S-ACP-DES6 | 1:16577609-16579722 | WT       | MIOX     | OK     |
| AT4G34780 | AT4G34780 | -          | 4:16592396-16592717 | WT       | MIOX     | OK     |
| AT2G20870 | AT2G20870 | -          | 2:8981987-8982712   | WT       | MIOX     | OK     |
| AT2G01021 | AT2G01021 | -          | 2:6570-6672         | WT       | MIOX     | OK     |
| AT4G37990 | AT4G37990 | CAD8       | 4:17855875-17857639 | WT       | MIOX     | OK     |
| AT1G05680 | AT1G05680 | UGT74E2    | 1:1703091-1704691   | WT       | MIOX     | OK     |
| AT2G39030 | AT2G39030 | NATA1      | 2:16298226-16299202 | WT       | MIOX     | OK     |
| AT2G47110 | AT2G47110 | RPS27AB    | 2:19344634-19346921 | WT       | MIOX     | OK     |
| AT4G34800 | AT4G34800 | -          | 4:16596859-16597144 | WT       | MIOX     | OK     |

|           |           |         |                     |    |      |    |
|-----------|-----------|---------|---------------------|----|------|----|
| AT3G20370 | AT3G20370 | -       | 3:7105370-7107225   | WT | MIOX | OK |
| AT2G35070 | AT2G35070 | -       | 2:14783290-14784710 | WT | MIOX | OK |
| AT5G26260 | AT5G26260 | -       | 5:9200462-9202400   | WT | MIOX | OK |
| AT3G44300 | AT3G44300 | NIT2    | 3:15983310-15985535 | WT | MIOX | OK |
| AT5G14180 | AT5G14180 | LIP2    | 5:4571336-4574462   | WT | MIOX | OK |
| AT2G24210 | AT2G24210 | TPS10   | 2:10294329-10297530 | WT | MIOX | OK |
| AT4G02541 | AT4G02541 | -       | 4:1119848-1119989   | WT | MIOX | OK |
| AT1G80160 | AT1G80160 | -       | 1:30151002-30152190 | WT | MIOX | OK |
| AT1G76790 | AT1G76790 | -       | 1:28816640-28823673 | WT | MIOX | OK |
| AT3G48520 | AT3G48520 | CYP94B3 | 3:17974976-17976670 | WT | MIOX | OK |
| AT4G10290 | AT4G10290 | -       | 4:6379700-6381739   | WT | MIOX | OK |
| AT5G24770 | AT5G24770 | VSP2    | 5:8500475-8502224   | WT | MIOX | OK |
| AT1G10585 | AT1G10585 | -       | 1:3493939-3495144   | WT | MIOX | OK |
| AT1G28480 | AT1G28480 | GRXC9   | 1:10013473-10014073 | WT | MIOX | OK |
| AT5G24780 | AT5G24780 | VSP1    | 5:8507589-8508957   | WT | MIOX | OK |
| AT3G09910 | AT3G09910 | RABC2B  | 3:3036713-3038449   | WT | MIOX | OK |
| AT3G55970 | AT3G55970 | ATJRG21 | 3:20766734-20769324 | WT | MIOX | OK |
| AT1G09500 | AT1G09500 | -       | 1:3066698-3068598   | WT | MIOX | OK |
| AT4G29030 | AT4G29030 | -       | 4:14307248-14307973 | WT | MIOX | OK |
| AT1G14120 | AT1G14120 | -       | 1:4833517-4835089   | WT | MIOX | OK |
| AT2G02990 | AT2G02990 | RNS1    | 2:873505-874811     | WT | MIOX | OK |
| ATCG00630 | ATCG00630 | PSAJ    | Pt:66928-67063      | WT | MIOX | OK |
| AT4G11320 | AT4G11320 | -       | 4:6887253-6889059   | WT | MIOX | OK |
| AT4G22470 | AT4G22470 | -       | 4:11840133-11841450 | WT | MIOX | OK |
| AT1G30370 | AT1G30370 | -       | 1:10719168-10720758 | WT | MIOX | OK |
| AT4G33467 | AT4G33467 | -       | 4:16101463-16102196 | WT | MIOX | OK |
| AT5G38870 | AT5G38870 | -       | 5:15561464-15562122 | WT | MIOX | OK |
| AT1G51780 | AT1G51780 | ILL5    | 1:19204511-19206586 | WT | MIOX | OK |
| AT4G16740 | AT4G16740 | TPS03   | 4:9407767-9410877   | WT | MIOX | OK |
| AT2G40205 | AT2G40205 | RPL41E  | 2:16792316-16792531 | WT | MIOX | OK |
| AT3G10040 | AT3G10040 | -       | 3:3096414-3098071   | WT | MIOX | OK |
| AT3G59220 | AT3G59220 | PRN1    | 3:21894133-21895623 | WT | MIOX | OK |
| AT2G07080 | AT2G07080 | -       | 2:2936238-2938827   | WT | MIOX | OK |
| AT4G15610 | AT4G15610 | -       | 4:8909063-8910908   | WT | MIOX | OK |
| AT5G28237 | AT5G28237 | -       | 5:10207352-10213598 | WT | MIOX | OK |
| AT1G01380 | AT1G01380 | ETC1    | 1:147152-147942     | WT | MIOX | OK |
| AT1G19397 | AT1G19397 | -       | 1:6709772-6711788   | WT | MIOX | OK |
| AT4G24000 | AT4G24000 | CSLG2   | 4:12462029-12465625 | WT | MIOX | OK |
| AT4G23680 | AT4G23680 | -       | 4:12336185-12337482 | WT | MIOX | OK |
| AT4G17470 | AT4G17470 | -       | 4:9742758-9744860   | WT | MIOX | OK |
| AT2G05950 | AT2G05950 | -       | 2:2297815-2298721   | WT | MIOX | OK |

|           |           |          |                     |    |      |    |
|-----------|-----------|----------|---------------------|----|------|----|
| AT5G50940 | AT5G50940 | -        | 5:20724577-20726479 | WT | MIOX | OK |
| AT1G52040 | AT1G52040 | MBP1     | 1:19350374-19352782 | WT | MIOX | OK |
| AT5G07010 | AT5G07010 | SOT15    | 5:2174677-2176106   | WT | MIOX | OK |
| AT4G36950 | AT4G36950 | MAPKKK21 | 4:17422571-17423901 | WT | MIOX | OK |
| AT5G23155 | AT5G23155 | -        | 5:7794141-7795010   | WT | MIOX | OK |
| AT2G18196 | AT2G18196 | -        | 2:7920507-7922326   | WT | MIOX | OK |
| AT1G15405 | AT1G15405 | -        | 1:5297874-5298166   | WT | MIOX | OK |
| AT3G46280 | AT3G46280 | -        | 3:17005482-17008424 | WT | MIOX | OK |
| AT5G05600 | AT5G05600 | -        | 5:1672119-1674739   | WT | MIOX | OK |
| ATCG01080 | ATCG01080 | NDHG     | Pt:118376-118907    | WT | MIOX | OK |
| AT5G64395 | AT5G64395 | -        | 5:25748201-25748297 | WT | MIOX | OK |
| AT4G24110 | AT4G24110 | -        | 4:12519931-12520813 | WT | MIOX | OK |
| AT2G15960 | AT2G15960 | -        | 2:6947308-6947688   | WT | MIOX | OK |
| AT3G11480 | AT3G11480 | BSMT1    | 3:3614436-3617314   | WT | MIOX | OK |
| AT4G16590 | AT4G16590 | ATCSLA01 | 4:9345149-9349221   | WT | MIOX | OK |
| AT5G49525 | AT5G49525 | -        | 5:20097039-20097486 | WT | MIOX | OK |
| AT5G15120 | AT5G15120 | PCO1     | 5:4898736-4900581   | WT | MIOX | OK |
| AT2G39330 | AT2G39330 | JAL23    | 2:16419595-16421852 | WT | MIOX | OK |
| AT5G19110 | AT5G19110 | -        | 5:6411560-6413170   | WT | MIOX | OK |
| AT5G13330 | AT5G13330 | ERF113   | 5:4272059-4274660   | WT | MIOX | OK |
| AT2G43510 | AT2G43510 | ATTI1    | 2:18067171-18067802 | WT | MIOX | OK |
| AT1G74480 | AT1G74480 | RKD2     | 1:27993031-27994178 | WT | MIOX | OK |
| AT2G38240 | AT2G38240 | -        | 2:16012534-16014753 | WT | MIOX | OK |
| AT1G24260 | AT1G24260 | 3-Sep    | 1:8593636-8596105   | WT | MIOX | OK |
| AT2G42365 | AT2G42365 | -        | 2:17640797-17645835 | WT | MIOX | OK |
| AT3G25180 | AT3G25180 | CYP82G1  | 3:9167283-9169282   | WT | MIOX | OK |
| AT5G67080 | AT5G67080 | MAPKKK19 | 5:26772725-26773760 | WT | MIOX | OK |
| AT2G06002 | AT2G06002 | -        | 2:2330775-2331479   | WT | MIOX | OK |
| AT5G59310 | AT5G59310 | LTP4     | 5:23925084-23925852 | WT | MIOX | OK |
| AT1G52890 | AT1G52890 | NAC019   | 1:19697003-19698482 | WT | MIOX | OK |
| AT1G52030 | AT1G52030 | F-ATMBP  | 1:19345939-19349088 | WT | MIOX | OK |
| AT5G57123 | AT5G57123 | -        | 5:23126921-23127654 | WT | MIOX | OK |
| AT4G03060 | AT4G03060 | AOP2     | 4:1351979-1353854   | WT | MIOX | OK |
| AT4G33560 | AT4G33560 | -        | 4:16135399-16135914 | WT | MIOX | OK |
| AT3G22121 | AT3G22121 | -        | 3:7794956-7796327   | WT | MIOX | OK |
| AT3G17110 | AT3G17110 | -        | 3:5837841-5838701   | WT | MIOX | OK |
| AT1G24070 | AT1G24070 | CSLA10   | 1:8516237-8519734   | WT | MIOX | OK |
| AT4G35783 | AT4G35783 | RTFL6    | 4:16952405-16952800 | WT | MIOX | OK |
| AT3G03190 | AT3G03190 | GSTF11   | 3:735027-735987     | WT | MIOX | OK |
| AT3G23450 | AT3G23450 | -        | 3:8410432-8412193   | WT | MIOX | OK |
| AT5G63690 | AT5G63690 | -        | 5:25492863-25493283 | WT | MIOX | OK |

|           |           |           |                     |    |      |    |
|-----------|-----------|-----------|---------------------|----|------|----|
| AT1G14250 | AT1G14250 | APY5      | 1:4868451-4871488   | WT | MIOX | OK |
| AT3G27250 | AT3G27250 | -         | 3:10061544-10062731 | WT | MIOX | OK |
| ATCG00820 | ATCG00820 | RPS19     | Pt:84004-84283      | WT | MIOX | OK |
| AT2G29490 | AT2G29490 | GSTU1     | 2:12631377-12632473 | WT | MIOX | OK |
| AT2G42540 | AT2G42540 | COR15A    | 2:17711031-17712330 | WT | MIOX | OK |
| AT2G05380 | AT2G05380 | GRP3S     | 2:1966815-1968037   | WT | MIOX | OK |
| AT1G64560 | AT1G64560 | -         | 1:23973728-23974775 | WT | MIOX | OK |
| AT1G17170 | AT1G17170 | GSTU24    | 1:5869845-5870840   | WT | MIOX | OK |
| AT3G20470 | AT3G20470 | GRP-5     | 3:7140439-7141228   | WT | MIOX | OK |
| AT1G29640 | AT1G29640 | -         | 1:10355702-10356482 | WT | MIOX | OK |
| AT2G32510 | AT2G32510 | MAPKKK17  | 2:13798820-13799939 | WT | MIOX | OK |
| AT5G23820 | AT5G23820 | -         | 5:8031267-8033020   | WT | MIOX | OK |
| AT2G38760 | AT2G38760 | ANN3      | 2:16200993-16202669 | WT | MIOX | OK |
| AT4G29700 | AT4G29700 | -         | 4:14543456-14545138 | WT | MIOX | OK |
| AT3G16470 | AT3G16470 | JAL35     | 3:5595928-5599224   | WT | MIOX | OK |
| AT4G37150 | AT4G37150 | MES9      | 4:17492877-17494109 | WT | MIOX | OK |
| AT1G15830 | AT1G15830 | -         | 1:5448725-5450177   | WT | MIOX | OK |
| AT1G19610 | AT1G19610 | PDF1.4    | 1:6781482-6782039   | WT | MIOX | OK |
| ATMG01390 | ATMG01390 | RRN18     | Mt:361349-363284    | WT | MIOX | OK |
| ATCG01020 | ATCG01020 | RPL32     | Pt:113448-113607    | WT | MIOX | OK |
| AT5G49665 | AT5G49665 | -         | 5:20167001-20169474 | WT | MIOX | OK |
| AT5G23940 | AT5G23940 | DCR       | 5:8076328-8079793   | WT | MIOX | OK |
| AT5G28640 | AT5G28640 | GIF1      | 5:10647569-10649892 | WT | MIOX | OK |
| AT3G43828 | AT3G43828 | -         | 3:15677382-15678009 | WT | MIOX | OK |
| AT4G39364 | AT4G39364 | -         | 4:18305414-18305536 | WT | MIOX | OK |
| AT3G45130 | AT3G45130 | LAS1      | 3:16512270-16517522 | WT | MIOX | OK |
| AT1G79075 | AT1G79075 | -         | 1:29745938-29746842 | WT | MIOX | OK |
| AT1G52400 | AT1G52400 | BGLU18    | 1:19515142-19518411 | WT | MIOX | OK |
| AT4G21920 | AT4G21920 | -         | 4:11636083-11636473 | WT | MIOX | OK |
| ATCG00290 | ATCG00290 | TRNS.2    | Pt:35311-35403      | WT | MIOX | OK |
| AT1G07400 | AT1G07400 | HSP17.8   | 1:2274942-2275758   | WT | MIOX | OK |
| AT4G08870 | AT4G08870 | ARGAH2    | 4:5646438-5648727   | WT | MIOX | OK |
| AT5G15960 | AT5G15960 | KIN1      | 5:5209897-5210727   | WT | MIOX | OK |
| AT5G67490 | AT5G67490 | -         | 5:26933949-26934952 | WT | MIOX | OK |
| AT3G02550 | AT3G02550 | LBD41     | 3:536504-537998     | WT | MIOX | OK |
| AT3G23250 | AT3G23250 | MYB15     | 3:8309208-8310826   | WT | MIOX | OK |
| AT1G62540 | AT1G62540 | FMOGS-OX2 | 1:23151793-23155717 | WT | MIOX | OK |
| AT3G55290 | AT3G55290 | -         | 3:20502611-20503797 | WT | MIOX | OK |
| ATCG00330 | ATCG00330 | RPS14     | Pt:36937-37240      | WT | MIOX | OK |
| ATCG01060 | ATCG01060 | PSAC      | Pt:117317-117563    | WT | MIOX | OK |
| AT5G38120 | AT5G38120 | 4CLL8     | 5:15213764-15216205 | WT | MIOX | OK |

|           |           |          |                     |    |      |    |
|-----------|-----------|----------|---------------------|----|------|----|
| AT2G02350 | AT2G02350 | SKIP3    | 2:617799-619091     | WT | MIOX | OK |
| AT5G05840 | AT5G05840 | -        | 5:1757097-1760666   | WT | MIOX | OK |
| AT5G19950 | AT5G19950 | -        | 5:6739623-6743773   | WT | MIOX | OK |
| AT4G15765 | AT4G15765 | -        | 4:8975403-8977211   | WT | MIOX | OK |
| AT1G52000 | AT1G52000 | JAL5     | 1:19333158-19336115 | WT | MIOX | OK |
| AT1G54050 | AT1G54050 | HSP17.4B | 1:20179421-20180281 | WT | MIOX | OK |
| AT1G03620 | AT1G03620 | -        | 1:904318-906186     | WT | MIOX | OK |
| AT5G01880 | AT5G01880 | ATL74    | 5:338898-340266     | WT | MIOX | OK |
| ATCG00280 | ATCG00280 | PSBC     | Pt:32710-35141      | WT | MIOX | OK |
| ATCG00020 | ATCG00020 | PSBA     | Pt:382-1444         | WT | MIOX | OK |
| AT2G07776 | AT2G07776 | -        | 2:3246018-3246901   | WT | MIOX | OK |
| AT5G60910 | AT5G60910 | AGL8     | 5:24502481-24506143 | WT | MIOX | OK |
| AT4G23600 | AT4G23600 | CORI3    | 4:12310618-12313212 | WT | MIOX | OK |
| AT2G44840 | AT2G44840 | ERF13    | 2:18495340-18496272 | WT | MIOX | OK |
| AT2G30360 | AT2G30360 | CIPK11   | 2:12936978-12939638 | WT | MIOX | OK |
| AT5G63450 | AT5G63450 | CYP94B1  | 5:25408894-25410573 | WT | MIOX | OK |
| AT1G05560 | AT1G05560 | UGT75B1  | 1:1645497-1647162   | WT | MIOX | OK |
| AT1G73325 | AT1G73325 | -        | 1:27567517-27568186 | WT | MIOX | OK |
| AT5G66110 | AT5G66110 | HIPP27   | 5:26430201-26430912 | WT | MIOX | OK |
| AT2G18000 | AT2G18000 | TAF14    | 2:7829034-7830580   | WT | MIOX | OK |
| AT4G25000 | AT4G25000 | AMY1     | 4:12851968-12853845 | WT | MIOX | OK |
| AT5G10625 | AT5G10625 | FLP2     | 5:3358786-3359781   | WT | MIOX | OK |
| AT1G32640 | AT1G32640 | MYC2     | 1:11798809-11800988 | WT | MIOX | OK |
| AT4G04925 | AT4G04925 | -        | 4:2506162-2506786   | WT | MIOX | OK |
| AT5G19100 | AT5G19100 | -        | 5:6408241-6409417   | WT | MIOX | OK |
| AT1G67025 | AT1G67025 | -        | 1:25013025-25014725 | WT | MIOX | OK |
| AT2G45680 | AT2G45680 | TCP9     | 2:18820241-18822184 | WT | MIOX | OK |
| AT2G36780 | AT2G36780 | UGT73C3  | 2:15417489-15419154 | WT | MIOX | OK |
| AT1G05135 | AT1G05135 | -        | 1:1477499-1478821   | WT | MIOX | OK |
| AT3G01970 | AT3G01970 | WRKY45   | 3:326396-327412     | WT | MIOX | OK |
| AT4G02485 | AT4G02485 | -        | 4:1092680-1094597   | WT | MIOX | OK |
| AT3G09260 | AT3G09260 | BGLU23   | 3:2838999-2843781   | WT | MIOX | OK |
| AT1G43160 | AT1G43160 | RAP2-6   | 1:16263812-16264818 | WT | MIOX | OK |
| AT1G20520 | AT1G20520 | -        | 1:7106164-7107977   | WT | MIOX | OK |
| AT2G41070 | AT2G41070 | DPBF4    | 2:17130773-17132386 | WT | MIOX | OK |
| AT2G06050 | AT2G06050 | OPR3     | 2:2359113-2362302   | WT | MIOX | OK |
| AT2G21660 | AT2G21660 | RBG7     | 2:9265248-9266393   | WT | MIOX | OK |
| AT2G38750 | AT2G38750 | ANN4     | 2:16196264-16198491 | WT | MIOX | OK |
| AT2G33400 | AT2G33400 | -        | 2:14151134-14154530 | WT | MIOX | OK |
| AT2G42040 | AT2G42040 | -        | 2:17543033-17545230 | WT | MIOX | OK |
| AT4G03030 | AT4G03030 | OR23     | 4:1335728-1337368   | WT | MIOX | OK |

|           |           |          |                     |    |      |    |
|-----------|-----------|----------|---------------------|----|------|----|
| AT5G42780 | AT5G42780 | ZHD13    | 5:17154775-17155757 | WT | MIOX | OK |
| AT4G08555 | AT4G08555 | -        | 4:5448132-5448523   | WT | MIOX | OK |
| AT3G60286 | AT3G60286 | -        | 3:22281740-22282248 | WT | MIOX | OK |
| AT1G75960 | AT1G75960 | AAE8     | 1:28518032-28519874 | WT | MIOX | OK |
| AT1G15415 | AT1G15415 | -        | 1:5298323-5301412   | WT | MIOX | OK |
| AT3G46650 | AT3G46650 | -        | 3:17185452-17187812 | WT | MIOX | OK |
| AT2G22200 | AT2G22200 | ERF056   | 2:9443127-9444423   | WT | MIOX | OK |
| AT5G63820 | AT5G63820 | -        | 5:25541575-25542893 | WT | MIOX | OK |
| AT5G57550 | AT5G57550 | XTH25    | 5:23304887-23306421 | WT | MIOX | OK |
| AT3G16380 | AT3G16380 | PAB6     | 3:5558675-5560993   | WT | MIOX | OK |
| AT2G34810 | AT2G34810 | -        | 2:14685255-14687062 | WT | MIOX | OK |
| AT5G15800 | AT5G15800 | 1-Sep    | 5:5148743-5154154   | WT | MIOX | OK |
| AT2G22080 | AT2G22080 | -        | 2:9386515-9388183   | WT | MIOX | OK |
| AT5G50335 | AT5G50335 | -        | 5:20489093-20489727 | WT | MIOX | OK |
| AT2G24550 | AT2G24550 | -        | 2:10427855-10429222 | WT | MIOX | OK |
| AT2G27310 | AT2G27310 | -        | 2:11683861-11684967 | WT | MIOX | OK |
| AT1G18710 | AT1G18710 | AtMYB47  | 1:6450593-6453114   | WT | MIOX | OK |
| AT2G43535 | AT2G43535 | ATTI4    | 2:18070972-18071676 | WT | MIOX | OK |
| AT3G46660 | AT3G46660 | UGT76E12 | 3:17188869-17191167 | WT | MIOX | OK |
| AT2G47180 | AT2G47180 | GOLS1    | 2:19366622-19370441 | WT | MIOX | OK |
| AT5G05420 | AT5G05420 | FKBP15-3 | 5:1604039-1604823   | WT | MIOX | OK |
| AT4G13860 | AT4G13860 | -        | 4:8022600-8023162   | WT | MIOX | OK |
| AT3G59068 | AT3G59068 | -        | 3:21832342-21834514 | WT | MIOX | OK |
| AT5G59220 | AT5G59220 | HAI1     | 5:23894403-23896619 | WT | MIOX | OK |
| ATMG01080 | ATMG01080 | ATP9     | Mt:278648-279152    | WT | MIOX | OK |
| AT1G28190 | AT1G28190 | -        | 1:9846883-9847923   | WT | MIOX | OK |
| AT2G21290 | AT2G21290 | -        | 2:9112855-9113330   | WT | MIOX | OK |
| AT5G17490 | AT5G17490 | RGL3     | 5:5764062-5766077   | WT | MIOX | OK |
| AT2G37770 | AT2G37770 | AKR4C9   | 2:15834866-15837001 | WT | MIOX | OK |
| AT1G56650 | AT1G56650 | MYB75    | 1:21233594-21235137 | WT | MIOX | OK |
| AT2G34070 | AT2G34070 | TBL37    | 2:14387420-14390230 | WT | MIOX | OK |
| ATCG00490 | ATCG00490 | RBCL     | Pt:54957-56397      | WT | MIOX | OK |
| ATCG00680 | ATCG00680 | PSBB     | Pt:72370-73897      | WT | MIOX | OK |
| AT1G06002 | AT1G06002 | -        | 1:1820307-1821918   | WT | MIOX | OK |
| AT4G15440 | AT4G15440 | CYP74B2  | 4:8835494-8838676   | WT | MIOX | OK |
| AT2G43018 | AT2G43018 | CPuORF17 | 2:17891502-17894635 | WT | MIOX | OK |
| AT5G01015 | AT5G01015 | -        | 5:5255-5891         | WT | MIOX | OK |
| AT3G26420 | AT3G26420 | RZ1A     | 3:9671516-9676005   | WT | MIOX | OK |
| AT3G56360 | AT3G56360 | -        | 3:20896480-20897593 | WT | MIOX | OK |
| AT1G60270 | AT1G60270 | BGLU6    | 1:22221676-22224257 | WT | MIOX | OK |
| AT5G14410 | AT5G14410 | -        | 5:4646780-4647444   | WT | MIOX | OK |

|           |           |            |                     |    |      |    |
|-----------|-----------|------------|---------------------|----|------|----|
| AT2G23620 | AT2G23620 | MES1       | 2:10047378-10049291 | WT | MIOX | OK |
| AT1G54040 | AT1G54040 | ESP        | 1:20170714-20173949 | WT | MIOX | OK |
| AT2G23010 | AT2G23010 | SCPL9      | 2:9798842-9802674   | WT | MIOX | OK |
| AT4G15953 | AT4G15953 | ESFL5      | 4:9042896-9043337   | WT | MIOX | OK |
| AT1G28815 | AT1G28815 | -          | 1:10095796-10096374 | WT | MIOX | OK |
| AT1G14130 | AT1G14130 | -          | 1:4835723-4837616   | WT | MIOX | OK |
| AT4G30460 | AT4G30460 | -          | 4:14888979-14889802 | WT | MIOX | OK |
| AT1G28050 | AT1G28050 | COL15      | 1:9775527-9777810   | WT | MIOX | OK |
| AT3G02020 | AT3G02020 | AK3        | 3:340545-343835     | WT | MIOX | OK |
| AT4G37430 | AT4G37430 | CYP81F1    | 4:17597109-17598958 | WT | MIOX | OK |
| AT3G16400 | AT3G16400 | NSP1       | 3:5566085-5568545   | WT | MIOX | OK |
| AT2G29460 | AT2G29460 | GSTU4      | 2:12626535-12627678 | WT | MIOX | OK |
| AT5G25240 | AT5G25240 | -          | 5:8746604-8747197   | WT | MIOX | OK |
| AT1G52240 | AT1G52240 | ATROPGEF11 | 1:19455765-19459586 | WT | MIOX | OK |
| AT3G20960 | AT3G20960 | CYP705A33  | 3:7345435-7347104   | WT | MIOX | OK |
| AT3G29575 | AT3G29575 | AFP3       | 3:11382213-11384004 | WT | MIOX | OK |
| AT3G15720 | AT3G15720 | -          | 3:5325289-5327639   | WT | MIOX | OK |
| AT5G65280 | AT5G65280 | GCL1       | 5:26085972-26088153 | WT | MIOX | OK |
| AT5G07700 | AT5G07700 | MYB76      | 5:2450324-2451578   | WT | MIOX | OK |
| AT3G22275 | AT3G22275 | -          | 3:7878981-7879808   | WT | MIOX | OK |
| AT1G49530 | AT1G49530 | GGPP6      | 1:18332428-18337520 | WT | MIOX | OK |
| AT5G64685 | AT5G64685 | -          | 5:25854139-25857377 | WT | MIOX | OK |
| AT5G34800 | AT5G34800 | -          | 5:12971143-12973180 | WT | MIOX | OK |
| AT5G20110 | AT5G20110 | -          | 5:6791486-6793346   | WT | MIOX | OK |
| AT5G59320 | AT5G59320 | LTP3       | 5:23928970-23929745 | WT | MIOX | OK |
| AT1G19670 | AT1G19670 | CLH1       | 1:6803610-6805044   | WT | MIOX | OK |
| AT2G45210 | AT2G45210 | SAUR36     | 2:18641565-18642704 | WT | MIOX | OK |
| AT5G37720 | AT5G37720 | ALY4       | 5:14981637-14984606 | WT | MIOX | OK |
| AT5G16980 | AT5G16980 | -          | 5:5579053-5580929   | WT | MIOX | OK |
| AT1G53625 | AT1G53625 | -          | 1:20014409-20014923 | WT | MIOX | OK |
| AT1G69260 | AT1G69260 | AFP1       | 1:26039047-26042702 | WT | MIOX | OK |
| ATMG00020 | ATMG00020 | RRN26      | Mt:8847-11415       | WT | MIOX | OK |
| AT3G50690 | AT3G50690 | -          | 3:18834966-18837097 | WT | MIOX | OK |
| AT5G59780 | AT5G59780 | MYB59      | 5:24082196-24083431 | WT | MIOX | OK |
| AT3G02390 | AT3G02390 | -          | 3:488779-489474     | WT | MIOX | OK |
| AT4G32340 | AT4G32340 | -          | 4:15612583-15614305 | WT | MIOX | OK |
| AT5G15970 | AT5G15970 | KIN2       | 5:5211910-5212665   | WT | MIOX | OK |
| AT1G20030 | AT1G20030 | -          | 1:6945424-6947344   | WT | MIOX | OK |
| AT1G31240 | AT1G31240 | -          | 1:11163857-11164928 | WT | MIOX | OK |
| AT2G17500 | AT2G17500 | -          | 2:7606756-7616342   | WT | MIOX | OK |
| AT5G02200 | AT5G02200 | FHL        | 5:437459-438894     | WT | MIOX | OK |

|           |           |         |                     |    |      |    |
|-----------|-----------|---------|---------------------|----|------|----|
| AT3G14630 | AT3G14630 | CYP72A9 | 3:4917497-4919409   | WT | MIOX | OK |
| AT4G28290 | AT4G28290 | -       | 4:14011843-14012583 | WT | MIOX | OK |
| AT3G15790 | AT3G15790 | MBD11   | 3:5343015-5344700   | WT | MIOX | OK |
| AT1G80800 | AT1G80800 | -       | 1:30364012-30364310 | WT | MIOX | OK |
| AT3G06868 | AT3G06868 | -       | 3:2167729-2169222   | WT | MIOX | OK |
| AT3G61920 | AT3G61920 | -       | 3:22932495-22933362 | WT | MIOX | OK |
| AT4G15120 | AT4G15120 | -       | 4:8634724-8635561   | WT | MIOX | OK |
| AT1G07290 | AT1G07290 | GONST2  | 1:2242255-2244428   | WT | MIOX | OK |
| AT1G22380 | AT1G22380 | UGT85A3 | 1:7900386-7902332   | WT | MIOX | OK |
| AT4G15910 | AT4G15910 | ATDI21  | 4:9028460-9029423   | WT | MIOX | OK |
| AT1G64690 | AT1G64690 | BLT     | 1:24038033-24039177 | WT | MIOX | OK |
| AT3G23930 | AT3G23930 | -       | 3:8646891-8647908   | WT | MIOX | OK |
| AT2G47485 | AT2G47485 | -       | 2:19485874-19486553 | WT | MIOX | OK |
| AT3G50280 | AT3G50280 | -       | 3:18637853-18639185 | WT | MIOX | OK |
| AT3G15400 | AT3G15400 | ATA20   | 3:5201643-5203197   | WT | MIOX | OK |
| AT1G19570 | AT1G19570 | DHAR1   | 1:6773301-6774528   | WT | MIOX | OK |
| AT3G15270 | AT3G15270 | SPL5    | 3:5138685-5142644   | WT | MIOX | OK |
| AT2G41780 | AT2G41780 | -       | 2:17428097-17428812 | WT | MIOX | OK |
| AT2G05540 | AT2G05540 | -       | 2:2033155-2034217   | WT | MIOX | OK |
| AT4G11300 | AT4G11300 | -       | 4:6872150-6873541   | WT | MIOX | OK |
| AT1G71330 | AT1G71330 | NAP5    | 1:26884013-26885169 | WT | MIOX | OK |
| AT3G41768 | AT3G41768 | -       | 3:14197676-14199484 | WT | MIOX | OK |
| AT1G79770 | AT1G79770 | -       | 1:30014360-30015078 | WT | MIOX | OK |
| AT3G05800 | AT3G05800 | BHLH150 | 3:1727305-1728296   | WT | MIOX | OK |
| AT4G04972 | AT4G04972 | -       | 4:2543463-2543971   | WT | MIOX | OK |
| AT3G62650 | AT3G62650 | -       | 3:23168060-23169187 | WT | MIOX | OK |
| AT5G28390 | AT5G28390 | -       | 5:10342023-10342997 | WT | MIOX | OK |
| AT4G26255 | AT4G26255 | -       | 4:13293940-13296465 | WT | MIOX | OK |
| AT5G56100 | AT5G56100 | -       | 5:22717114-22717751 | WT | MIOX | OK |
| AT4G39550 | AT4G39550 | -       | 4:18380525-18381905 | WT | MIOX | OK |
| AT2G43370 | AT2G43370 | SNRNP35 | 2:18013369-18015454 | WT | MIOX | OK |
| AT1G80120 | AT1G80120 | -       | 1:30139100-30140204 | WT | MIOX | OK |
| AT1G50460 | AT1G50460 | HKL1    | 1:18693683-18697659 | WT | MIOX | OK |
| AT1G68520 | AT1G68520 | COL6    | 1:25709113-25710907 | WT | MIOX | OK |
| AT3G11570 | AT3G11570 | TBL8    | 3:3639434-3647542   | WT | MIOX | OK |
| AT5G13340 | AT5G13340 | -       | 5:4277938-4279446   | WT | MIOX | OK |
| AT5G41010 | AT5G41010 | NRPB12  | 5:16424049-16424952 | WT | MIOX | OK |
| AT3G63540 | AT3G63540 | -       | 3:23459181-23459804 | WT | MIOX | OK |
| AT1G08940 | AT1G08940 | -       | 1:2877691-2879169   | WT | MIOX | OK |
| AT4G36900 | AT4G36900 | RAP2-10 | 4:17388813-17389837 | WT | MIOX | OK |
| AT3G45140 | AT3G45140 | LOX2    | 3:16525409-16529352 | WT | MIOX | OK |



|           |           |         |                     |    |      |    |
|-----------|-----------|---------|---------------------|----|------|----|
| ATCG00350 | ATCG00350 | PSAA    | Pt:39604-41857      | WT | MIOX | OK |
| AT4G01080 | AT4G01080 | TBL26   | 4:466390-468294     | WT | MIOX | OK |
| AT3G02510 | AT3G02510 | -       | 3:519363-524631     | WT | MIOX | OK |
| AT4G33150 | AT4G33150 | LKR/SDH | 4:15985188-15991538 | WT | MIOX | OK |
| AT1G11380 | AT1G11380 | -       | 1:3832622-3834191   | WT | MIOX | OK |
| AT3G11120 | AT3G11120 | RPL41E  | 3:3481051-3481448   | WT | MIOX | OK |
| AT4G15210 | AT4G15210 | BAM5    | 4:8666337-8669470   | WT | MIOX | OK |
| AT1G75190 | AT1G75190 | -       | 1:28219381-28220227 | WT | MIOX | OK |
| AT5G23680 | AT5G23680 | -       | 5:7981640-7986851   | WT | MIOX | OK |
| AT5G06230 | AT5G06230 | TBL9    | 5:1879936-1887121   | WT | MIOX | OK |
| AT1G56300 | AT1G56300 | -       | 1:21078819-21080423 | WT | MIOX | OK |
| AT5G56140 | AT5G56140 | -       | 5:22725368-22728343 | WT | MIOX | OK |
| AT3G17668 | AT3G17668 | ENA     | 3:6039602-6040489   | WT | MIOX | OK |
| AT5G21970 | AT5G21970 | -       | 5:7261599-7263513   | WT | MIOX | OK |
| AT3G07030 | AT3G07030 | -       | 3:2223000-2225254   | WT | MIOX | OK |
| AT4G32990 | AT4G32990 | -       | 4:15920229-15922658 | WT | MIOX | OK |
| AT1G49700 | AT1G49700 | -       | 1:18388791-18390496 | WT | MIOX | OK |
| AT3G05640 | AT3G05640 | -       | 3:1640392-1643253   | WT | MIOX | OK |
| AT1G74430 | AT1G74430 | MYB95   | 1:27975178-27980404 | WT | MIOX | OK |
| AT2G42530 | AT2G42530 | COR15B  | 2:17709035-17709945 | WT | MIOX | OK |
| AT2G33380 | AT2G33380 | PXG3    | 2:14144830-14146471 | WT | MIOX | OK |
| AT4G28020 | AT4G28020 | -       | 4:13930358-13935315 | WT | MIOX | OK |
| AT3G24860 | AT3G24860 | -       | 3:9073622-9085048   | WT | MIOX | OK |
| AT1G64572 | AT1G64572 | -       | 1:23984010-23986731 | WT | MIOX | OK |
| AT1G44350 | AT1G44350 | ILL6    | 1:16834209-16838286 | WT | MIOX | OK |
| AT4G12480 | AT4G12480 | EARL11  | 4:7406104-7406937   | WT | MIOX | OK |
| AT5G66170 | AT5G66170 | STR18   | 5:26447641-26448776 | WT | MIOX | OK |
| AT2G28910 | AT2G28910 | CXIP4   | 2:12415779-12417385 | WT | MIOX | OK |
| AT1G71015 | AT1G71015 | -       | 1:26789235-26790160 | WT | MIOX | OK |
| AT4G10390 | AT4G10390 | -       | 4:6441672-6443435   | WT | MIOX | OK |
| AT1G07610 | AT1G07610 | MT1C    | 1:2341541-2342123   | WT | MIOX | OK |
| AT5G65300 | AT5G65300 | -       | 5:26095146-26095771 | WT | MIOX | OK |
| AT1G08230 | AT1G08230 | GAT1    | 1:2583653-2586744   | WT | MIOX | OK |
| AT5G09830 | AT5G09830 | BOLA2   | 5:3057645-3058821   | WT | MIOX | OK |
| AT1G27110 | AT1G27110 | -       | 1:9412819-9417504   | WT | MIOX | OK |
| AT5G64970 | AT5G64970 | -       | 5:25955380-25960644 | WT | MIOX | OK |
| AT5G03495 | AT5G03495 | -       | 5:873330-875251     | WT | MIOX | OK |
| AT1G27420 | AT1G27420 | -       | 1:9519107-9520520   | WT | MIOX | OK |
| AT4G35060 | AT4G35060 | HIPP25  | 4:16685719-16686703 | WT | MIOX | OK |
| AT5G58470 | AT5G58470 | TAF15B  | 5:23637706-23640920 | WT | MIOX | OK |
| AT4G34230 | AT4G34230 | CAD5    | 4:16386718-16388722 | WT | MIOX | OK |

|           |           |           |                     |    |      |    |
|-----------|-----------|-----------|---------------------|----|------|----|
| AT3G56020 | AT3G56020 | RPL41E    | 3:20790569-20791085 | WT | MIOX | OK |
| AT4G24350 | AT4G24350 | -         | 4:12609527-12612131 | WT | MIOX | OK |
| AT1G33120 | AT1G33120 | RPL9B     | 1:12010900-12012524 | WT | MIOX | OK |
| AT2G20480 | AT2G20480 | -         | 2:8830564-8831533   | WT | MIOX | OK |
| AT4G21620 | AT4G21620 | -         | 4:11491481-11492167 | WT | MIOX | OK |
| AT5G07690 | AT5G07690 | MYB29     | 5:2446763-2448543   | WT | MIOX | OK |
| AT2G29440 | AT2G29440 | GSTU6     | 2:12620059-12621148 | WT | MIOX | OK |
| AT3G48350 | AT3G48350 | CEP3      | 3:17905724-17907561 | WT | MIOX | OK |
| AT3G47965 | AT3G47965 | -         | 3:17707917-17708909 | WT | MIOX | OK |
| AT3G22740 | AT3G22740 | HMT3      | 3:8032958-8035809   | WT | MIOX | OK |
| AT4G19150 | AT4G19150 | -         | 4:10469663-10472742 | WT | MIOX | OK |
| AT4G13410 | AT4G13410 | CSLA15    | 4:7792218-7795824   | WT | MIOX | OK |
| AT2G32690 | AT2G32690 | ATGRP23   | 2:13863716-13864596 | WT | MIOX | OK |
| AT3G13277 | AT3G13277 | -         | 3:4290081-4291595   | WT | MIOX | OK |
| AT5G53110 | AT5G53110 | -         | 5:21529021-21533159 | WT | MIOX | OK |
| AT2G05520 | AT2G05520 | GRP3      | 2:2026161-2027117   | WT | MIOX | OK |
| AT3G17160 | AT3G17160 | -         | 3:5852151-5854906   | WT | MIOX | OK |
| AT5G34871 | AT5G34871 | -         | 5:13085036-13086565 | WT | MIOX | OK |
| AT1G53887 | AT1G53887 | -         | 1:20122425-20122866 | WT | MIOX | OK |
| AT2G45760 | AT2G45760 | BAP2      | 2:18847006-18847821 | WT | MIOX | OK |
| AT5G50530 | AT5G50530 | CBSCBSPB4 | 5:20571680-20575538 | WT | MIOX | OK |
| AT1G72175 | AT1G72175 | -         | 1:27157874-27159558 | WT | MIOX | OK |
| AT3G20130 | AT3G20130 | CYP705A22 | 3:7026928-7028836   | WT | MIOX | OK |
| AT5G65207 | AT5G65207 | -         | 5:26052244-26052644 | WT | MIOX | OK |
| AT5G10300 | AT5G10300 | HNL       | 5:3239616-3240870   | WT | MIOX | OK |
| AT1G61600 | AT1G61600 | -         | 1:22729815-22731182 | WT | MIOX | OK |
| AT1G06000 | AT1G06000 | UGT89C1   | 1:1820307-1821918   | WT | MIOX | OK |
| AT5G52070 | AT5G52070 | -         | 5:21161310-21165025 | WT | MIOX | OK |
| AT2G29450 | AT2G29450 | GSTU5     | 2:12624585-12625637 | WT | MIOX | OK |
| AT2G10931 | AT2G10931 | -         | 2:4304946-4305887   | WT | MIOX | OK |
| AT1G74930 | AT1G74930 | ERF018    | 1:28144131-28145049 | WT | MIOX | OK |
| AT1G26770 | AT1G26770 | EXPA10    | 1:9259604-9261313   | WT | MIOX | OK |
| AT5G53880 | AT5G53880 | -         | 5:21872793-21873303 | WT | MIOX | OK |
| AT2G01008 | AT2G01008 | -         | 2:1024-2810         | WT | MIOX | OK |
| AT1G18265 | AT1G18265 | -         | 1:6282251-6283293   | WT | MIOX | OK |
| AT1G34100 | AT1G34100 | -         | 1:12415543-12417172 | WT | MIOX | OK |
| AT5G52390 | AT5G52390 | -         | 5:21263935-21265264 | WT | MIOX | OK |
| AT4G05170 | AT4G05170 | BHLH114   | 4:2667989-2669364   | WT | MIOX | OK |
| AT1G26930 | AT1G26930 | -         | 1:9336056-9337786   | WT | MIOX | OK |
| AT4G04410 | AT4G04410 | -         | 4:2189514-2193763   | WT | MIOX | OK |
| AT3G19710 | AT3G19710 | BCAT4     | 3:6843661-6849497   | WT | MIOX | OK |

|           |           |           |                     |    |      |    |
|-----------|-----------|-----------|---------------------|----|------|----|
| AT4G01670 | AT4G01670 | -         | 4:708543-712643     | WT | MIOX | OK |
| AT4G13195 | AT4G13195 | CLE44     | 4:7662370-7663177   | WT | MIOX | OK |
| AT5G05690 | AT5G05690 | CYP90A1   | 5:1702687-1706787   | WT | MIOX | OK |
| AT3G48970 | AT3G48970 | -         | 3:18152287-18153375 | WT | MIOX | OK |
| AT3G20040 | AT3G20040 | ATHXK4    | 3:6994893-6998171   | WT | MIOX | OK |
| AT2G38500 | AT2G38500 | -         | 2:16117394-16119108 | WT | MIOX | OK |
| AT5G54890 | AT5G54890 | -         | 5:22293324-22295144 | WT | MIOX | OK |
| AT3G17050 | AT3G17050 | -         | 3:5814747-5816592   | WT | MIOX | OK |
| AT4G18280 | AT4G18280 | -         | 4:10103995-10104733 | WT | MIOX | OK |
| AT1G65860 | AT1G65860 | FMOGS-OX1 | 1:24499065-24502745 | WT | MIOX | OK |
| AT1G01990 | AT1G01990 | -         | 1:343165-344341     | WT | MIOX | OK |
| AT5G46730 | AT5G46730 | -         | 5:18964011-18965068 | WT | MIOX | OK |
| AT5G16110 | AT5G16110 | -         | 5:5260603-5262840   | WT | MIOX | OK |
| AT4G39955 | AT4G39955 | -         | 4:18530542-18532259 | WT | MIOX | OK |
| AT2G22800 | AT2G22800 | HAT9      | 2:9704705-9706150   | WT | MIOX | OK |
| AT1G35460 | AT1G35460 | BHLH80    | 1:13039915-13042102 | WT | MIOX | OK |
| AT3G15950 | AT3G15950 | NAI2      | 3:5397568-5402652   | WT | MIOX | OK |
| AT4G04614 | AT4G04614 | -         | 4:2327043-2328264   | WT | MIOX | OK |
| AT2G17280 | AT2G17280 | PGM       | 2:7513127-7515048   | WT | MIOX | OK |
| AT4G12990 | AT4G12990 | -         | 4:7594943-7595463   | WT | MIOX | OK |
| AT1G60260 | AT1G60260 | BGLU5     | 1:22218787-22221409 | WT | MIOX | OK |
| AT2G22790 | AT2G22790 | -         | 2:9695931-9696909   | WT | MIOX | OK |
| AT5G05330 | AT5G05330 | -         | 5:1576981-1578754   | WT | MIOX | OK |
| AT5G60440 | AT5G60440 | AGL62     | 5:24306293-24307716 | WT | MIOX | OK |
| AT3G23260 | AT3G23260 | -         | 3:8313333-8314422   | WT | MIOX | OK |
| AT5G05250 | AT5G05250 | -         | 5:1557036-1557998   | WT | MIOX | OK |
| AT3G47836 | AT3G47836 | -         | 3:17650259-17651765 | WT | MIOX | OK |
| AT5G26960 | AT5G26960 | -         | 5:9484733-9486149   | WT | MIOX | OK |
| AT2G17442 | AT2G17442 | -         | 2:7573834-7575939   | WT | MIOX | OK |
| AT4G13540 | AT4G13540 | -         | 4:7869873-7870750   | WT | MIOX | OK |
| AT1G10140 | AT1G10140 | -         | 1:3322801-3323548   | WT | MIOX | OK |
| AT5G03552 | AT5G03552 | MIR822A   | 5:897019-897356     | WT | MIOX | OK |
| AT1G23470 | AT1G23470 | -         | 1:8331296-8332136   | WT | MIOX | OK |
| AT5G26210 | AT5G26210 | AL4       | 5:9157141-9160383   | WT | MIOX | OK |
| AT4G14090 | AT4G14090 | UGT75C1   | 4:8120717-8123835   | WT | MIOX | OK |
| AT2G38823 | AT2G38823 | -         | 2:16224071-16225296 | WT | MIOX | OK |
| AT5G27860 | AT5G27860 | -         | 5:9874823-9876464   | WT | MIOX | OK |
| AT2G25450 | AT2G25450 | GSL-OH    | 2:10829915-10831655 | WT | MIOX | OK |
| AT3G63160 | AT3G63160 | -         | 3:23333512-23334034 | WT | MIOX | OK |
| AT3G28500 | AT3G28500 | RPP2C     | 3:10682096-10682731 | WT | MIOX | OK |
| AT5G24155 | AT5G24155 | -         | 5:8180117-8181027   | WT | MIOX | OK |

|           |           |          |                     |    |      |    |
|-----------|-----------|----------|---------------------|----|------|----|
| AT1G58848 | AT1G58848 | RF9      | 1:21791782-21797050 | WT | MIOX | OK |
| AT1G02850 | AT1G02850 | BGLU11   | 1:630504-633259     | WT | MIOX | OK |
| AT1G22350 | AT1G22350 | -        | 1:7892877-7894498   | WT | MIOX | OK |
| AT1G58235 | AT1G58235 | -        | 1:21579684-21580696 | WT | MIOX | OK |
| AT3G03460 | AT3G03460 | -        | 3:822936-824546     | WT | MIOX | OK |
| AT1G19640 | AT1G19640 | JMT      | 1:6788884-6791846   | WT | MIOX | OK |
| AT1G25400 | AT1G25400 | -        | 1:8911129-8912642   | WT | MIOX | OK |
| AT3G59930 | AT3G59930 | -        | 3:22139550-22140320 | WT | MIOX | OK |
| AT5G61290 | AT5G61290 | -        | 5:24648557-24652776 | WT | MIOX | OK |
| AT5G03210 | AT5G03210 | -        | 5:762786-763321     | WT | MIOX | OK |
| AT4G27860 | AT4G27860 | MEB1     | 4:13870381-13876528 | WT | MIOX | OK |
| AT1G76180 | AT1G76180 | ERD14    | 1:28586675-28587931 | WT | MIOX | OK |
| AT1G67590 | AT1G67590 | -        | 1:25333057-25334647 | WT | MIOX | OK |
| AT5G65050 | AT5G65050 | AGL31    | 5:25982253-25986326 | WT | MIOX | OK |
| AT3G52070 | AT3G52070 | -        | 3:19312683-19314731 | WT | MIOX | OK |
| AT1G31350 | AT1G31350 | SKIP25   | 1:11221334-11222786 | WT | MIOX | OK |
| AT1G10610 | AT1G10610 | BHLH90   | 1:3506185-3511975   | WT | MIOX | OK |
| AT5G27660 | AT5G27660 | DEGP14   | 5:9789467-9792299   | WT | MIOX | OK |
| AT3G21050 | AT3G21050 | -        | 3:7375157-7376420   | WT | MIOX | OK |
| AT2G38250 | AT2G38250 | GT-3B    | 2:16018356-16019500 | WT | MIOX | OK |
| AT3G09160 | AT3G09160 | -        | 3:2805778-2807055   | WT | MIOX | OK |
| AT1G17380 | AT1G17380 | TIFY11A  | 1:5955487-5957212   | WT | MIOX | OK |
| AT1G23140 | AT1G23140 | -        | 1:8202260-8203215   | WT | MIOX | OK |
| AT1G56612 | AT1G56612 | -        | 1:21211718-21215406 | WT | MIOX | OK |
| AT3G47120 | AT3G47120 | -        | 3:17351140-17352822 | WT | MIOX | OK |
| AT1G09190 | AT1G09190 | PCMP-E70 | 1:2966119-2967718   | WT | MIOX | OK |
| AT4G30570 | AT4G30570 | -        | 4:14930676-14931951 | WT | MIOX | OK |
| AT1G78270 | AT1G78270 | UGT85A4  | 1:29450562-29452417 | WT | MIOX | OK |
| AT5G22545 | AT5G22545 | -        | 5:7483252-7483811   | WT | MIOX | OK |
| AT5G05550 | AT5G05550 | -        | 5:1639031-1640606   | WT | MIOX | OK |
| AT1G11440 | AT1G11440 | -        | 1:3849359-3850662   | WT | MIOX | OK |
| AT3G04890 | AT3G04890 | -        | 3:1347645-1349202   | WT | MIOX | OK |
| AT5G44420 | AT5G44420 | PDF1.2A  | 5:17907068-17907598 | WT | MIOX | OK |
| AT5G61600 | AT5G61600 | ERF104   | 5:24766385-24767430 | WT | MIOX | OK |
| AT5G51390 | AT5G51390 | -        | 5:20875875-20878464 | WT | MIOX | OK |
| AT1G16916 | AT1G16916 | -        | 1:5786559-5787112   | WT | MIOX | OK |
| AT5G65390 | AT5G65390 | AGP7     | 5:26128583-26129338 | WT | MIOX | OK |
| AT1G71790 | AT1G71790 | -        | 1:26996808-26998977 | WT | MIOX | OK |
| AT2G05812 | AT2G05812 | -        | 2:2214011-2217159   | WT | MIOX | OK |
| AT5G25620 | AT5G25620 | YUC6     | 5:8935039-8938758   | WT | MIOX | OK |
| AT4G37432 | AT4G37432 | -        | 4:17597109-17598958 | WT | MIOX | OK |

|           |           |          |                     |    |      |    |
|-----------|-----------|----------|---------------------|----|------|----|
| AT5G36220 | AT5G36220 | CYP81D1  | 5:14253689-14256033 | WT | MIOX | OK |
| AT2G47400 | AT2G47400 | CP12-1   | 2:19446853-19447438 | WT | MIOX | OK |
| AT5G67480 | AT5G67480 | BT4      | 5:26930938-26933093 | WT | MIOX | OK |
| AT4G36720 | AT4G36720 | HVA22K   | 4:17307768-17312488 | WT | MIOX | OK |
| AT5G66400 | AT5G66400 | RAB18    | 5:26518276-26519242 | WT | MIOX | OK |
| AT1G54120 | AT1G54120 | -        | 1:20207019-20207540 | WT | MIOX | OK |
| AT2G33020 | AT2G33020 | AtRLP24  | 2:14013873-14016516 | WT | MIOX | OK |
| ATCG00530 | ATCG00530 | CEMA     | Pt:60740-61430      | WT | MIOX | OK |
| AT3G06500 | AT3G06500 | INVC     | 3:2012078-2015705   | WT | MIOX | OK |
| AT3G50440 | AT3G50440 | ATMES10  | 3:18713696-18718494 | WT | MIOX | OK |
| ATCG00340 | ATCG00340 | PSAB     | Pt:37374-39579      | WT | MIOX | OK |
| AT5G04750 | AT5G04750 | -        | 5:1372146-1374787   | WT | MIOX | OK |
| AT1G20220 | AT1G20220 | -        | 1:7004878-7007651   | WT | MIOX | OK |
| AT4G16530 | AT4G16530 | -        | 4:9311354-9315813   | WT | MIOX | OK |
| AT5G47330 | AT5G47330 | -        | 5:19207098-19208822 | WT | MIOX | OK |
| AT4G19230 | AT4G19230 | CYP707A1 | 4:10521378-10523961 | WT | MIOX | OK |
| AT5G09672 | AT5G09672 | CPuORF21 | 5:2995909-2998932   | WT | MIOX | OK |
| AT3G08770 | AT3G08770 | LTP6     | 3:2664129-2664834   | WT | MIOX | OK |
| AT3G58200 | AT3G58200 | -        | 3:21559892-21561465 | WT | MIOX | OK |
| AT3G09980 | AT3G09980 | -        | 3:3069230-3071429   | WT | MIOX | OK |
| AT1G73210 | AT1G73210 | -        | 1:27528051-27530952 | WT | MIOX | OK |
| AT4G27460 | AT4G27460 | CBSX5    | 4:13732909-13734304 | WT | MIOX | OK |
| AT2G05440 | AT2G05440 | ATGRP9   | 2:1993081-1994166   | WT | MIOX | OK |
| AT3G25870 | AT3G25870 | -        | 3:9463315-9464283   | WT | MIOX | OK |
| AT4G28162 | AT4G28162 | -        | 4:13980315-13981001 | WT | MIOX | OK |
| AT3G52105 | AT3G52105 | -        | 3:19323331-19325713 | WT | MIOX | OK |
| AT2G17470 | AT2G17470 | ALMT6    | 2:7584504-7588008   | WT | MIOX | OK |
| AT4G28190 | AT4G28190 | ULT1     | 4:13985177-13987442 | WT | MIOX | OK |
| AT4G35420 | AT4G35420 | TKPR1    | 4:16832480-16835619 | WT | MIOX | OK |
| AT5G24930 | AT5G24930 | ATCOL4   | 5:8589233-8591236   | WT | MIOX | OK |
| AT5G14360 | AT5G14360 | -        | 5:4630996-4631742   | WT | MIOX | OK |
| AT1G64900 | AT1G64900 | CYP89A2  | 1:24113214-24114984 | WT | MIOX | OK |
| AT1G29600 | AT1G29600 | -        | 1:10344045-10346243 | WT | MIOX | OK |
| AT1G31550 | AT1G31550 | -        | 1:11295524-11297379 | WT | MIOX | OK |
| AT3G18790 | AT3G18790 | -        | 3:6477698-6479548   | WT | MIOX | OK |
| AT2G27720 | AT2G27720 | RPP2A    | 2:11818490-11819578 | WT | MIOX | OK |
| AT1G76940 | AT1G76940 | -        | 1:28902427-28904311 | WT | MIOX | OK |
| AT5G59580 | AT5G59580 | UGT76E1  | 5:24006078-24007689 | WT | MIOX | OK |
| AT3G27030 | AT3G27030 | -        | 3:9972507-9974225   | WT | MIOX | OK |
| AT2G17990 | AT2G17990 | -        | 2:7826816-7828754   | WT | MIOX | OK |
| AT3G28220 | AT3G28220 | -        | 3:10524403-10526728 | WT | MIOX | OK |

|           |           |           |                     |    |      |    |
|-----------|-----------|-----------|---------------------|----|------|----|
| AT2G44730 | AT2G44730 | -         | 2:18437332-18438565 | WT | MIOX | OK |
| AT4G06746 | AT4G06746 | RAP2-9    | 4:4073961-4074545   | WT | MIOX | OK |
| AT1G62560 | AT1G62560 | FMOGS-OX3 | 1:23159822-23162649 | WT | MIOX | OK |
| AT3G52310 | AT3G52310 | ABCG27    | 3:19398627-19402953 | WT | MIOX | OK |
| AT2G45570 | AT2G45570 | CYP76C2   | 2:18779792-18781958 | WT | MIOX | OK |
| AT1G28070 | AT1G28070 | -         | 1:9782995-9783998   | WT | MIOX | OK |
| AT1G22370 | AT1G22370 | UGT85A5   | 1:7898012-7899879   | WT | MIOX | OK |
| AT3G19660 | AT3G19660 | -         | 3:6825520-6826006   | WT | MIOX | OK |
| AT5G42380 | AT5G42380 | CML37     | 5:16942575-16943366 | WT | MIOX | OK |
| AT4G39366 | AT4G39366 | -         | 4:18305584-18305704 | WT | MIOX | OK |
| AT1G76560 | AT1G76560 | CP12-3    | 1:28728252-28728853 | WT | MIOX | OK |
| AT2G42200 | AT2G42200 | SPL9      | 2:17587406-17589630 | WT | MIOX | OK |
| AT1G43675 | AT1G43675 | -         | 1:16470871-16471248 | WT | MIOX | OK |
| AT5G53800 | AT5G53800 | -         | 5:21848134-21850111 | WT | MIOX | OK |
| AT3G57910 | AT3G57910 | -         | 3:21442747-21444312 | WT | MIOX | OK |
| AT2G40240 | AT2G40240 | -         | 2:16811025-16812228 | WT | MIOX | OK |
| AT1G54010 | AT1G54010 | GLL23     | 1:20158663-20160815 | WT | MIOX | OK |
| AT4G08580 | AT4G08580 | -         | 4:5461482-5466671   | WT | MIOX | OK |
| AT3G21750 | AT3G21750 | UGT71B1   | 3:7664344-7666195   | WT | MIOX | OK |
| AT5G66010 | AT5G66010 | -         | 5:26399431-26400999 | WT | MIOX | OK |
| AT4G12080 | AT4G12080 | AHL1      | 4:7239218-7241494   | WT | MIOX | OK |
| AT5G66230 | AT5G66230 | -         | 5:26461151-26464131 | WT | MIOX | OK |
| AT1G03940 | AT1G03940 | 3AT1      | 1:1009541-1011056   | WT | MIOX | OK |
| AT2G42260 | AT2G42260 | PYM       | 2:17601954-17603633 | WT | MIOX | OK |
| AT2G38400 | AT2G38400 | AGT3      | 2:16083688-16086349 | WT | MIOX | OK |
| AT3G59940 | AT3G59940 | SKIP20    | 3:22142899-22147691 | WT | MIOX | OK |
| AT4G23050 | AT4G23050 | -         | 4:12080059-12084256 | WT | MIOX | OK |
| AT1G66100 | AT1G66100 | -         | 1:24605670-24606537 | WT | MIOX | OK |
| AT1G62660 | AT1G62660 | BFRUCT3   | 1:23199717-23203765 | WT | MIOX | OK |
| AT5G65580 | AT5G65580 | -         | 5:26206844-26207962 | WT | MIOX | OK |
| AT1G23980 | AT1G23980 | ATL47     | 1:8484702-8486002   | WT | MIOX | OK |
| AT3G48290 | AT3G48290 | CYP71A24  | 3:17882555-17884270 | WT | MIOX | OK |
| AT2G33550 | AT2G33550 | -         | 2:14210031-14211588 | WT | MIOX | OK |
| AT4G17950 | AT4G17950 | AHL13     | 4:9966989-9969232   | WT | MIOX | OK |
| AT2G01080 | AT2G01080 | -         | 2:77887-79334       | WT | MIOX | OK |
| AT5G10350 | AT5G10350 | PABN3     | 5:3255304-3257807   | WT | MIOX | OK |
| AT2G42170 | AT2G42170 | -         | 2:17577713-17580392 | WT | MIOX | OK |
| AT3G51940 | AT3G51940 | -         | 3:19273493-19275269 | WT | MIOX | OK |
| AT5G13870 | AT5G13870 | XTH5      | 5:4474975-4477045   | WT | MIOX | OK |
| AT5G67300 | AT5G67300 | MYB44     | 5:26854021-26856941 | WT | MIOX | OK |
| AT1G19960 | AT1G19960 | -         | 1:6928038-6928463   | WT | MIOX | OK |

|           |           |         |                     |    |      |    |
|-----------|-----------|---------|---------------------|----|------|----|
| AT3G62790 | AT3G62790 | -       | 3:23223060-23224308 | WT | MIOX | OK |
| AT1G06640 | AT1G06640 | -       | 1:2032337-2034018   | WT | MIOX | OK |
| AT2G39420 | AT2G39420 | -       | 2:16460363-16463061 | WT | MIOX | OK |
| AT5G65420 | AT5G65420 | CYCD4-1 | 5:26141469-26143993 | WT | MIOX | OK |
| AT2G22330 | AT2G22330 | CYP79B3 | 2:9488553-9491187   | WT | MIOX | OK |
| AT1G52565 | AT1G52565 | -       | 1:19579885-19580686 | WT | MIOX | OK |
| AT2G33740 | AT2G33740 | CUTA    | 2:14269580-14273385 | WT | MIOX | OK |
| AT1G15200 | AT1G15200 | -       | 1:5228299-5231184   | WT | MIOX | OK |
| AT2G48010 | AT2G48010 | RKF3    | 2:19641376-19643491 | WT | MIOX | OK |
| AT4G14270 | AT4G14270 | CID2    | 4:8218377-8219322   | WT | MIOX | OK |
| AT2G31360 | AT2G31360 | ADS2    | 2:13371657-13373606 | WT | MIOX | OK |
| AT5G18790 | AT5G18790 | -       | 5:6264269-6266907   | WT | MIOX | OK |
| AT5G53220 | AT5G53220 | -       | 5:21595989-21598224 | WT | MIOX | OK |
| AT2G03470 | AT2G03470 | -       | 2:1045451-1047684   | WT | MIOX | OK |
| AT4G01200 | AT4G01200 | -       | 4:506510-507626     | WT | MIOX | OK |
| AT2G43530 | AT2G43530 | ATTI3   | 2:18070055-18070718 | WT | MIOX | OK |
| AT2G05310 | AT2G05310 | -       | 2:1933271-1934212   | WT | MIOX | OK |
| AT5G52310 | AT5G52310 | LTI78   | 5:21240848-21243613 | WT | MIOX | OK |
| AT3G61190 | AT3G61190 | BAP1    | 3:22650158-22651488 | WT | MIOX | OK |
| AT1G70700 | AT1G70700 | TIFY7   | 1:26654767-26657064 | WT | MIOX | OK |
| AT1G68340 | AT1G68340 | -       | 1:25614196-25615403 | WT | MIOX | OK |
| AT4G14820 | AT4G14820 | PCMP-H3 | 4:8507793-8510038   | WT | MIOX | OK |
| AT4G24340 | AT4G24340 | -       | 4:12607446-12609252 | WT | MIOX | OK |
| AT1G33140 | AT1G33140 | RPL9B   | 1:12023274-12024783 | WT | MIOX | OK |
| AT4G14580 | AT4G14580 | CIPK4   | 4:8367886-8369167   | WT | MIOX | OK |
| AT2G42190 | AT2G42190 | -       | 2:17582868-17584194 | WT | MIOX | OK |
| AT3G11110 | AT3G11110 | ATL66   | 3:3479978-3480455   | WT | MIOX | OK |
| AT3G16420 | AT3G16420 | PBP1    | 3:5579385-5580953   | WT | MIOX | OK |
| AT3G06690 | AT3G06690 | -       | 3:2115425-2116825   | WT | MIOX | OK |
| AT2G12190 | AT2G12190 | -       | 2:4891641-4893345   | WT | MIOX | OK |
| AT3G18320 | AT3G18320 | -       | 3:6289226-6290383   | WT | MIOX | OK |
| AT2G47190 | AT2G47190 | ATMYB2  | 2:19376201-19377531 | WT | MIOX | OK |
| AT2G25930 | AT2G25930 | ELF3    | 2:11059034-11066028 | WT | MIOX | OK |
| AT1G16500 | AT1G16500 | -       | 1:5639031-5640173   | WT | MIOX | OK |
| AT3G06780 | AT3G06780 | -       | 3:2143487-2145776   | WT | MIOX | OK |
| AT3G48550 | AT3G48550 | -       | 3:17993998-17994734 | WT | MIOX | OK |
| AT4G08590 | AT4G08590 | ORTHL   | 4:5461482-5466671   | WT | MIOX | OK |
| AT5G28330 | AT5G28330 | -       | 5:10307168-10308142 | WT | MIOX | OK |
| AT4G25150 | AT4G25150 | -       | 4:12900429-12903125 | WT | MIOX | OK |
| AT1G49450 | AT1G49450 | -       | 1:18305540-18307557 | WT | MIOX | OK |
| AT3G48600 | AT3G48600 | -       | 3:18010092-18011440 | WT | MIOX | OK |

|           |           |         |                     |    |      |    |
|-----------|-----------|---------|---------------------|----|------|----|
| AT1G17830 | AT1G17830 | -       | 1:6135802-6138432   | WT | MIOX | OK |
| AT2G23340 | AT2G23340 | ERF008  | 2:9937997-9938875   | WT | MIOX | OK |
| AT1G13350 | AT1G13350 | -       | 1:4572418-4576632   | WT | MIOX | OK |
| AT1G30480 | AT1G30480 | DRT111  | 1:10786978-10792575 | WT | MIOX | OK |
| AT1G72620 | AT1G72620 | -       | 1:27341078-27342455 | WT | MIOX | OK |
| AT1G50970 | AT1G50970 | -       | 1:18896322-18900268 | WT | MIOX | OK |
| AT2G19740 | AT2G19740 | RPL31A  | 2:8513512-8514519   | WT | MIOX | OK |
| AT5G09880 | AT5G09880 | -       | 5:3081441-3085264   | WT | MIOX | OK |
| AT2G23560 | AT2G23560 | MES7    | 2:10029274-10030382 | WT | MIOX | OK |
| AT3G02875 | AT3G02875 | ILR1    | 3:631912-634074     | WT | MIOX | OK |
| AT1G70890 | AT1G70890 | MLP43   | 1:26725625-26726544 | WT | MIOX | OK |
| AT3G57540 | AT3G57540 | -       | 3:21301396-21303061 | WT | MIOX | OK |
| AT1G53680 | AT1G53680 | GSTU28  | 1:20038357-20039117 | WT | MIOX | OK |
| AT3G14180 | AT3G14180 | ASIL2   | 3:4707112-4708848   | WT | MIOX | OK |
| AT1G15230 | AT1G15230 | -       | 1:5242197-5243227   | WT | MIOX | OK |
| AT2G01913 | AT2G01913 | -       | 2:421623-422626     | WT | MIOX | OK |
| AT2G41210 | AT2G41210 | PIP5K5  | 2:17173412-17176807 | WT | MIOX | OK |
| AT3G28850 | AT3G28850 | -       | 3:10848668-10850122 | WT | MIOX | OK |
| AT3G55240 | AT3G55240 | -       | 3:20473540-20474763 | WT | MIOX | OK |
| AT4G34140 | AT4G34140 | -       | 4:16350779-16354264 | WT | MIOX | OK |
| AT1G47655 | AT1G47655 | DOF1.6  | 1:17525364-17526306 | WT | MIOX | OK |
| AT1G11700 | AT1G11700 | -       | 1:3945736-3946613   | WT | MIOX | OK |
| AT1G46768 | AT1G46768 | RAP2-1  | 1:17265700-17266536 | WT | MIOX | OK |
| AT5G42820 | AT5G42820 | U2AF35B | 5:17166817-17171704 | WT | MIOX | OK |
| AT1G32190 | AT1G32190 | -       | 1:11592954-11595982 | WT | MIOX | OK |
| AT5G17900 | AT5G17900 | -       | 5:5924706-5926901   | WT | MIOX | OK |
| AT4G21910 | AT4G21910 | -       | 4:11625361-11631078 | WT | MIOX | OK |
| AT5G40490 | AT5G40490 | -       | 5:16225375-16227709 | WT | MIOX | OK |
| AT5G14440 | AT5G14440 | -       | 5:4652979-4657907   | WT | MIOX | OK |
| AT1G77000 | AT1G77000 | SKP2B   | 1:28940146-28942623 | WT | MIOX | OK |
| AT5G52120 | AT5G52120 | PP2A14  | 5:21176421-21180310 | WT | MIOX | OK |
| AT2G39800 | AT2G39800 | P5CSA   | 2:16596986-16603319 | WT | MIOX | OK |
| AT1G47970 | AT1G47970 | -       | 1:17687268-17688816 | WT | MIOX | OK |
| AT3G27100 | AT3G27100 | SUS1    | 3:9994544-9996025   | WT | MIOX | OK |
| AT1G56200 | AT1G56200 | emb1303 | 1:21030793-21032078 | WT | MIOX | OK |
| AT1G12710 | AT1G12710 | P2A12   | 1:4326738-4328481   | WT | MIOX | OK |
| AT1G79790 | AT1G79790 | -       | 1:30015872-30018231 | WT | MIOX | OK |
| AT2G26020 | AT2G26020 | PDF1.2B | 2:11089249-11089597 | WT | MIOX | OK |
| AT3G01430 | AT3G01430 | -       | 3:165407-166247     | WT | MIOX | OK |
| AT1G66760 | AT1G66760 | -       | 1:24901977-24904443 | WT | MIOX | OK |
| AT5G23410 | AT5G23410 | -       | 5:7885590-7886790   | WT | MIOX | OK |



|           |           |          |                     |    |      |    |
|-----------|-----------|----------|---------------------|----|------|----|
| AT4G31510 | AT4G31510 | -        | 4:15276179-15277219 | WT | MIOX | OK |
| AT1G67600 | AT1G67600 | -        | 1:25336422-25337662 | WT | MIOX | OK |
| AT4G37000 | AT4G37000 | RCCR     | 4:17442611-17443855 | WT | MIOX | OK |
| AT3G56930 | AT3G56930 | PAT04    | 3:21073420-21076314 | WT | MIOX | OK |
| AT5G58920 | AT5G58920 | -        | 5:23793128-23794245 | WT | MIOX | OK |
| AT2G41640 | AT2G41640 | -        | 2:17360485-17363788 | WT | MIOX | OK |
| AT5G60430 | AT5G60430 | -        | 5:24301607-24303068 | WT | MIOX | OK |
| AT1G58807 | AT1G58807 | RDL5     | 1:21780184-21784314 | WT | MIOX | OK |
| AT5G50450 | AT5G50450 | -        | 5:20543309-20544753 | WT | MIOX | OK |
| AT4G28085 | AT4G28085 | -        | 4:13959969-13960574 | WT | MIOX | OK |
| AT2G37035 | AT2G37035 | -        | 2:15554916-15556831 | WT | MIOX | OK |
| AT5G37300 | AT5G37300 | WSD1     | 5:14767498-14770249 | WT | MIOX | OK |
| AT5G65870 | AT5G65870 | PSK5     | 5:26351507-26352269 | WT | MIOX | OK |
| AT4G17940 | AT4G17940 | -        | 4:9965741-9966969   | WT | MIOX | OK |
| AT2G01755 | AT2G01755 | -        | 2:332193-332781     | WT | MIOX | OK |
| AT2G25625 | AT2G25625 | -        | 2:10906427-10907288 | WT | MIOX | OK |
| AT1G30880 | AT1G30880 | -        | 1:10993194-10994125 | WT | MIOX | OK |
| AT5G06190 | AT5G06190 | -        | 5:1873161-1876782   | WT | MIOX | OK |
| AT3G09162 | AT3G09162 | -        | 3:2807666-2808268   | WT | MIOX | OK |
| AT1G25500 | AT1G25500 | -        | 1:8955248-8957978   | WT | MIOX | OK |
| AT3G24740 | AT3G24740 | -        | 3:9031095-9033796   | WT | MIOX | OK |
| AT5G67620 | AT5G67620 | -        | 5:26964769-26965996 | WT | MIOX | OK |
| AT1G25440 | AT1G25440 | COL16    | 1:8933715-8935460   | WT | MIOX | OK |
| AT2G46000 | AT2G46000 | -        | 2:18919315-18922179 | WT | MIOX | OK |
| AT4G01030 | AT4G01030 | PCMP-H65 | 4:447051-450642     | WT | MIOX | OK |
| AT5G14390 | AT5G14390 | -        | 5:4637311-4639756   | WT | MIOX | OK |
| AT5G41120 | AT5G41120 | -        | 5:16455187-16459237 | WT | MIOX | OK |
| AT1G78370 | AT1G78370 | GSTU20   | 1:29484268-29485290 | WT | MIOX | OK |
| AT1G33260 | AT1G33260 | -        | 1:12064508-12066376 | WT | MIOX | OK |
| AT5G55670 | AT5G55670 | -        | 5:22543939-22546801 | WT | MIOX | OK |
| AT1G76010 | AT1G76010 | -        | 1:28528076-28530790 | WT | MIOX | OK |
| AT1G08890 | AT1G08890 | SUGTL4   | 1:2848347-2852270   | WT | MIOX | OK |
| AT3G10090 | AT3G10090 | RPS28A   | 3:3108809-3110026   | WT | MIOX | OK |
| AT2G26740 | AT2G26740 | ATSEH    | 2:11392964-11394279 | WT | MIOX | OK |
| AT3G53210 | AT3G53210 | -        | 3:19720164-19721875 | WT | MIOX | OK |
| AT5G01520 | AT5G01520 | -        | 5:206431-208611     | WT | MIOX | OK |
| AT1G62350 | AT1G62350 | -        | 1:23056652-23058156 | WT | MIOX | OK |
| AT5G58020 | AT5G58020 | -        | 5:23485499-23488620 | WT | MIOX | OK |
| AT2G45380 | AT2G45380 | -        | 2:18698591-18703093 | WT | MIOX | OK |
| AT2G37580 | AT2G37580 | ATL33    | 2:15764727-15765553 | WT | MIOX | OK |
| AT5G48485 | AT5G48485 | DIR1     | 5:19646231-19646802 | WT | MIOX | OK |

|           |           |           |                     |    |      |    |
|-----------|-----------|-----------|---------------------|----|------|----|
| AT3G15500 | AT3G15500 | NAC055    | 3:5234616-5236088   | WT | MIOX | OK |
| AT1G29560 | AT1G29560 | -         | 1:10332370-10335694 | WT | MIOX | OK |
| AT4G13320 | AT4G13320 | -         | 4:7753310-7754086   | WT | MIOX | OK |
| AT1G11170 | AT1G11170 | -         | 1:3740764-3744675   | WT | MIOX | OK |
| AT4G39600 | AT4G39600 | -         | 4:18389435-18390539 | WT | MIOX | OK |
| AT3G03370 | AT3G03370 | -         | 3:797253-799148     | WT | MIOX | OK |
| AT5G05340 | AT5G05340 | PER52     | 5:1578950-1580875   | WT | MIOX | OK |
| AT2G17036 | AT2G17036 | -         | 2:7403855-7405219   | WT | MIOX | OK |
| AT5G54490 | AT5G54490 | PBP1      | 5:22121403-22121931 | WT | MIOX | OK |
| AT1G68140 | AT1G68140 | -         | 1:25538944-25541741 | WT | MIOX | OK |
| AT1G32630 | AT1G32630 | -         | 1:11797334-11798602 | WT | MIOX | OK |
| AT1G01720 | AT1G01720 | NAC002    | 1:268329-270775     | WT | MIOX | OK |
| AT1G22310 | AT1G22310 | MBD8      | 1:7881536-7883742   | WT | MIOX | OK |
| AT3G52870 | AT3G52870 | -         | 3:19593172-19595822 | WT | MIOX | OK |
| AT1G26210 | AT1G26210 | ATSOFL1   | 1:9066635-9069238   | WT | MIOX | OK |
| AT1G49650 | AT1G49650 | CXE4      | 1:18377251-18378634 | WT | MIOX | OK |
| AT4G18440 | AT4G18440 | -         | 4:10186130-10188909 | WT | MIOX | OK |
| AT1G75450 | AT1G75450 | CKX5      | 1:28313486-28318375 | WT | MIOX | OK |
| AT4G29430 | AT4G29430 | RPS15AE   | 4:14472399-14473621 | WT | MIOX | OK |
| AT4G39030 | AT4G39030 | EDS5      | 4:18185666-18190556 | WT | MIOX | OK |
| AT1G63800 | AT1G63800 | UBC5      | 1:23667615-23669080 | WT | MIOX | OK |
| ATCG00520 | ATCG00520 | YCF4      | Pt:59771-60326      | WT | MIOX | OK |
| AT1G27650 | AT1G27650 | U2AF35A   | 1:9614462-9616357   | WT | MIOX | OK |
| AT5G23010 | AT5G23010 | MAM1      | 5:7703091-7706896   | WT | MIOX | OK |
| AT1G13990 | AT1G13990 | -         | 1:4794755-4796597   | WT | MIOX | OK |
| AT1G10890 | AT1G10890 | -         | 1:3627725-3630765   | WT | MIOX | OK |
| AT1G29395 | AT1G29395 | COR413IM1 | 1:10288196-10289621 | WT | MIOX | OK |
| AT4G13770 | AT4G13770 | CYP83A1   | 4:7990484-7992311   | WT | MIOX | OK |
| AT5G43170 | AT5G43170 | AZF3      | 5:17329274-17331646 | WT | MIOX | OK |
| AT5G52840 | AT5G52840 | -         | 5:21413645-21417616 | WT | MIOX | OK |
| AT5G45350 | AT5G45350 | -         | 5:18381836-18383699 | WT | MIOX | OK |
| AT2G34600 | AT2G34600 | TIFY 5B   | 2:14573079-14573856 | WT | MIOX | OK |
| AT5G16410 | AT5G16410 | -         | 5:5365668-5367385   | WT | MIOX | OK |
| AT2G45330 | AT2G45330 | emb1067   | 2:18686311-18688035 | WT | MIOX | OK |
| AT5G19960 | AT5G19960 | -         | 5:6743925-6746339   | WT | MIOX | OK |
| AT2G23290 | AT2G23290 | AtMYB70   | 2:9904786-9905920   | WT | MIOX | OK |
| AT2G41380 | AT2G41380 | -         | 2:17251940-17253057 | WT | MIOX | OK |
| AT4G10600 | AT4G10600 | -         | 4:6547785-6548864   | WT | MIOX | OK |
| AT5G64920 | AT5G64920 | CIP8      | 5:25940710-25945442 | WT | MIOX | OK |
| AT3G43690 | AT3G43690 | -         | 3:15598178-15600798 | WT | MIOX | OK |
| AT1G54060 | AT1G54060 | ASIL1     | 1:20180678-20182324 | WT | MIOX | OK |

|           |           |          |                     |    |      |    |
|-----------|-----------|----------|---------------------|----|------|----|
| AT1G07260 | AT1G07260 | UGT71C3  | 1:2227593-2229319   | WT | MIOX | OK |
| AT5G06390 | AT5G06390 | FLA17    | 5:1952850-1955788   | WT | MIOX | OK |
| AT5G14650 | AT5G14650 | -        | 5:4724449-4726513   | WT | MIOX | OK |
| AT1G14520 | AT1G14520 | MIOX1    | 1:4968141-4970311   | WT | MIOX | OK |
| AT4G17620 | AT4G17620 | -        | 4:9821912-9825029   | WT | MIOX | OK |
| AT3G59710 | AT3G59710 | -        | 3:22054936-22057156 | WT | MIOX | OK |
| AT5G25210 | AT5G25210 | -        | 5:8723957-8725771   | WT | MIOX | OK |
| AT2G28370 | AT2G28370 | -        | 2:12131553-12133704 | WT | MIOX | OK |
| AT2G19380 | AT2G19380 | UBA1C    | 2:8383855-8386604   | WT | MIOX | OK |
| AT1G70820 | AT1G70820 | -        | 1:26705517-26708264 | WT | MIOX | OK |
| AT3G16460 | AT3G16460 | JAL34    | 3:5592581-5595717   | WT | MIOX | OK |
| AT2G37430 | AT2G37430 | ZAT11    | 2:15706356-15707224 | WT | MIOX | OK |
| AT3G29075 | AT3G29075 | -        | 3:11051488-11052694 | WT | MIOX | OK |
| AT4G23870 | AT4G23870 | -        | 4:12414229-12415049 | WT | MIOX | OK |
| AT2G30615 | AT2G30615 | -        | 2:13036875-13042586 | WT | MIOX | OK |
| AT5G64350 | AT5G64350 | FKBP12   | 5:25734597-25736071 | WT | MIOX | OK |
| AT1G51760 | AT1G51760 | ILL4     | 1:19199418-19201642 | WT | MIOX | OK |
| AT1G63380 | AT1G63380 | -        | 1:23505556-23506504 | WT | MIOX | OK |
| AT3G01920 | AT3G01920 | -        | 3:317431-321560     | WT | MIOX | OK |
| AT4G21850 | AT4G21850 | MSRB9    | 4:11591115-11592238 | WT | MIOX | OK |
| AT5G28913 | AT5G28913 | SADHU4-1 | 5:10933822-10934730 | WT | MIOX | OK |
| AT3G44860 | AT3G44860 | FAMT     | 3:16379632-16381070 | WT | MIOX | OK |
| AT5G15820 | AT5G15820 | -        | 5:5161723-5163030   | WT | MIOX | OK |
| AT5G21950 | AT5G21950 | -        | 5:7253920-7255944   | WT | MIOX | OK |
| AT3G29375 | AT3G29375 | -        | 3:11280150-11281894 | WT | MIOX | OK |
| AT3G02040 | AT3G02040 | GDPD1    | 3:344907-350010     | WT | MIOX | OK |
| AT5G65260 | AT5G65260 | PABN2    | 5:26080230-26083017 | WT | MIOX | OK |
| AT5G07152 | AT5G07152 | -        | 5:2215819-2217983   | WT | MIOX | OK |
| AT4G38680 | AT4G38680 | CSP2     | 4:18071883-18073182 | WT | MIOX | OK |
| AT3G03702 | AT3G03702 | -        | 3:916355-918834     | WT | MIOX | OK |
| AT5G14200 | AT5G14200 | IMDH3    | 5:4576201-4581374   | WT | MIOX | OK |
| AT5G03850 | AT5G03850 | RPS28A   | 5:1028339-1029121   | WT | MIOX | OK |
| AT4G15260 | AT4G15260 | -        | 4:8713688-8715339   | WT | MIOX | OK |
| AT5G01170 | AT5G01170 | -        | 5:58161-60136       | WT | MIOX | OK |
| AT4G13530 | AT4G13530 | -        | 4:7866718-7868742   | WT | MIOX | OK |
| AT5G54810 | AT5G54810 | TSB1     | 5:22264593-22266785 | WT | MIOX | OK |
| AT2G10410 | AT2G10410 | SADHU1-1 | 2:4005578-4007044   | WT | MIOX | OK |
| AT1G45229 | AT1G45229 | -        | 1:17154920-17159397 | WT | MIOX | OK |
| AT1G48390 | AT1G48390 | -        | 1:17879447-17880903 | WT | MIOX | OK |
| AT4G36380 | AT4G36380 | ROT3     | 4:17187249-17192317 | WT | MIOX | OK |
| AT3G48120 | AT3G48120 | -        | 3:17771169-17774739 | WT | MIOX | OK |

|           |           |         |                     |    |      |    |
|-----------|-----------|---------|---------------------|----|------|----|
| AT2G27470 | AT2G27470 | NF-YB11 | 2:11740633-11746411 | WT | MIOX | OK |
| AT3G29000 | AT3G29000 | CML30   | 3:11005778-11006414 | WT | MIOX | OK |
| AT2G18050 | AT2G18050 | HIS1-3  | 2:7845922-7846884   | WT | MIOX | OK |
| AT2G34200 | AT2G34200 | -       | 2:14440647-14442005 | WT | MIOX | OK |
| AT4G13570 | AT4G13570 | HTA4    | 4:7884515-7885982   | WT | MIOX | OK |
| AT1G43700 | AT1G43700 | VIP1    | 1:16484230-16486241 | WT | MIOX | OK |
| AT2G44525 | AT2G44525 | -       | 2:18382069-18383513 | WT | MIOX | OK |
| AT5G57570 | AT5G57570 | -       | 5:23313435-23314415 | WT | MIOX | OK |
| AT5G16950 | AT5G16950 | -       | 5:5572575-5573070   | WT | MIOX | OK |
| AT3G20390 | AT3G20390 | RIDA    | 3:7109948-7111824   | WT | MIOX | OK |
| AT4G30940 | AT4G30940 | -       | 4:15054872-15056826 | WT | MIOX | OK |
| AT5G08185 | AT5G08185 | MIR162A | 5:2634100-2635438   | WT | MIOX | OK |
| AT5G59950 | AT5G59950 | ALY1    | 5:24139938-24141867 | WT | MIOX | OK |
| AT4G38260 | AT4G38260 | -       | 4:17935401-17941558 | WT | MIOX | OK |
| AT4G24660 | AT4G24660 | ZHD1    | 4:12724742-12725637 | WT | MIOX | OK |
| AT3G07560 | AT3G07560 | PEX13   | 3:2411320-2413475   | WT | MIOX | OK |
| AT1G31750 | AT1G31750 | -       | 1:11370658-11372077 | WT | MIOX | OK |
| AT3G19990 | AT3G19990 | -       | 3:6965646-6967248   | WT | MIOX | OK |
| AT1G60870 | AT1G60870 | MEE9    | 1:22409471-22410654 | WT | MIOX | OK |
| AT2G45520 | AT2G45520 | -       | 2:18753073-18756302 | WT | MIOX | OK |
| AT3G46130 | AT3G46130 | MYB48   | 3:16945363-16946461 | WT | MIOX | OK |
| AT1G21600 | AT1G21600 | PTAC6   | 1:7570885-7573846   | WT | MIOX | OK |
| AT5G60980 | AT5G60980 | -       | 5:24543359-24546269 | WT | MIOX | OK |
| AT2G33855 | AT2G33855 | -       | 2:14324308-14325192 | WT | MIOX | OK |
| AT3G02410 | AT3G02410 | ICMEL2  | 3:492117-494948     | WT | MIOX | OK |
| AT5G03110 | AT5G03110 | -       | 5:730291-731448     | WT | MIOX | OK |
| AT1G01240 | AT1G01240 | -       | 1:99893-101834      | WT | MIOX | OK |
| AT2G23430 | AT2G23430 | KRP1    | 2:9976745-9978021   | WT | MIOX | OK |
| AT5G03660 | AT5G03660 | -       | 5:937976-940058     | WT | MIOX | OK |
| AT2G29420 | AT2G29420 | GSTU7   | 2:12616563-12618899 | WT | MIOX | OK |
| AT5G17050 | AT5G17050 | UGT78D2 | 5:5607787-5609492   | WT | MIOX | OK |
| AT4G31290 | AT4G31290 | -       | 4:15185800-15188484 | WT | MIOX | OK |
| AT4G25690 | AT4G25690 | -       | 4:13090208-13091798 | WT | MIOX | OK |
| AT2G30790 | AT2G30790 | PSBP2   | 2:13118936-13120090 | WT | MIOX | OK |
| AT4G27800 | AT4G27800 | PPH1    | 4:13851861-13854191 | WT | MIOX | OK |
| AT5G37055 | AT5G37055 | SWC6    | 5:14641550-14642440 | WT | MIOX | OK |
| AT3G58710 | AT3G58710 | WRKY69  | 3:21715006-21717948 | WT | MIOX | OK |
| AT5G64560 | AT5G64560 | MRS2-2  | 5:25806768-25809641 | WT | MIOX | OK |
| AT5G51940 | AT5G51940 | NRPB6A  | 5:21104570-21108605 | WT | MIOX | OK |
| AT1G03180 | AT1G03180 | -       | 1:773410-775344     | WT | MIOX | OK |
| AT5G01980 | AT5G01980 | -       | 5:375214-377208     | WT | MIOX | OK |

|           |           |          |                     |    |      |    |
|-----------|-----------|----------|---------------------|----|------|----|
| AT3G12140 | AT3G12140 | EML1     | 3:3868587-3871728   | WT | MIOX | OK |
| AT1G03140 | AT1G03140 | -        | 1:754370-756303     | WT | MIOX | OK |
| AT5G60870 | AT5G60870 | -        | 5:24484621-24487824 | WT | MIOX | OK |
| AT1G59930 | AT1G59930 | -        | 1:22061082-22061481 | WT | MIOX | OK |
| AT1G76820 | AT1G76820 | -        | 1:28837572-28842566 | WT | MIOX | OK |
| AT1G76440 | AT1G76440 | -        | 1:28682128-28683750 | WT | MIOX | OK |
| AT4G15248 | AT4G15248 | -        | 4:8708847-8709373   | WT | MIOX | OK |
| AT1G64680 | AT1G64680 | -        | 1:24036020-24037401 | WT | MIOX | OK |
| AT1G32760 | AT1G32760 | -        | 1:11858210-11859292 | WT | MIOX | OK |
| AT2G36420 | AT2G36420 | -        | 2:15286497-15288990 | WT | MIOX | OK |
| AT1G06620 | AT1G06620 | -        | 1:2025600-2027271   | WT | MIOX | OK |
| AT1G06530 | AT1G06530 | PMD2     | 1:2001593-2002596   | WT | MIOX | OK |
| AT3G02515 | AT3G02515 | SADHU6-1 | 3:525369-526255     | WT | MIOX | OK |
| AT2G41870 | AT2G41870 | -        | 2:17470865-17472936 | WT | MIOX | OK |
| AT5G20130 | AT5G20130 | -        | 5:6797439-6800977   | WT | MIOX | OK |
| AT2G22450 | AT2G22450 | RIBA2    | 2:9530546-9532914   | WT | MIOX | OK |
| AT2G36080 | AT2G36080 | ARF31    | 2:15148258-15151575 | WT | MIOX | OK |
| AT1G71080 | AT1G71080 | -        | 1:26809840-26811842 | WT | MIOX | OK |
| AT5G14530 | AT5G14530 | -        | 5:4684619-4686909   | WT | MIOX | OK |
| AT3G13480 | AT3G13480 | -        | 3:4392955-4393961   | WT | MIOX | OK |
| AT3G27210 | AT3G27210 | Y-2      | 3:10045185-10047343 | WT | MIOX | OK |
| AT2G04410 | AT2G04410 | -        | 2:1531147-1535118   | WT | MIOX | OK |
| ATCG00540 | ATCG00540 | PETA     | Pt:61656-62619      | WT | MIOX | OK |
| AT2G16660 | AT2G16660 | -        | 2:7218705-7221625   | WT | MIOX | OK |
| AT1G48300 | AT1G48300 | -        | 1:17847355-17853807 | WT | MIOX | OK |
| AT2G21970 | AT2G21970 | 2-Sep    | 2:9354841-9357916   | WT | MIOX | OK |
| AT3G59530 | AT3G59530 | SSL13    | 3:21991825-21995308 | WT | MIOX | OK |
| AT2G28670 | AT2G28670 | DIR10    | 2:12300202-12302358 | WT | MIOX | OK |
| AT3G09940 | AT3G09940 | MDHAR    | 3:3056374-3059148   | WT | MIOX | OK |
| AT4G19390 | AT4G19390 | -        | 4:10574767-10576428 | WT | MIOX | OK |
| AT1G27695 | AT1G27695 | -        | 1:9639023-9640151   | WT | MIOX | OK |
| AT2G46640 | AT2G46640 | -        | 2:19148661-19151080 | WT | MIOX | OK |
| AT5G24735 | AT5G24735 | -        | 5:8468330-8469262   | WT | MIOX | OK |
| AT1G19120 | AT1G19120 | LSM1A    | 1:6608114-6610613   | WT | MIOX | OK |
| AT1G73010 | AT1G73010 | PS2      | 1:27464571-27466256 | WT | MIOX | OK |
| AT2G46270 | AT2G46270 | GBF3     | 2:19000190-19003403 | WT | MIOX | OK |
| AT2G11910 | AT2G11910 | -        | 2:4805683-4807319   | WT | MIOX | OK |
| AT3G46620 | AT3G46620 | -        | 3:17178696-17180067 | WT | MIOX | OK |
| AT2G16890 | AT2G16890 | UGT90A1  | 2:7316888-7319181   | WT | MIOX | OK |
| AT1G80290 | AT1G80290 | -        | 1:30188320-30189726 | WT | MIOX | OK |
| AT4G17480 | AT4G17480 | -        | 4:9745005-9746966   | WT | MIOX | OK |

|           |           |         |                     |    |      |    |
|-----------|-----------|---------|---------------------|----|------|----|
| AT1G64500 | AT1G64500 | -       | 1:23953232-23954492 | WT | MIOX | OK |
| AT5G61900 | AT5G61900 | BON1    | 5:24855620-24864172 | WT | MIOX | OK |
| AT5G52430 | AT5G52430 | -       | 5:21281772-21285271 | WT | MIOX | OK |
| AT4G13110 | AT4G13110 | -       | 4:7641377-7642598   | WT | MIOX | OK |
| AT5G64360 | AT5G64360 | -       | 5:25736339-25738667 | WT | MIOX | OK |
| AT3G12070 | AT3G12070 | AtRGTB2 | 3:3845210-3847562   | WT | MIOX | OK |
| AT3G11100 | AT3G11100 | -       | 3:3476186-3477405   | WT | MIOX | OK |
| AT5G16420 | AT5G16420 | -       | 5:5368033-5369641   | WT | MIOX | OK |
| AT5G16370 | AT5G16370 | AAE5    | 5:5356604-5358511   | WT | MIOX | OK |
| AT4G13850 | AT4G13850 | RBG2    | 4:8020950-8022260   | WT | MIOX | OK |
| AT1G56000 | AT1G56000 | -       | 1:20944140-20949281 | WT | MIOX | OK |
| AT3G50970 | AT3G50970 | XERO2   | 3:18940776-18941554 | WT | MIOX | OK |
| AT2G37340 | AT2G37340 | RS2Z33  | 2:15669137-15672700 | WT | MIOX | OK |
| AT1G13245 | AT1G13245 | RTFL17  | 1:4525485-4526064   | WT | MIOX | OK |
| AT4G36980 | AT4G36980 | -       | 4:17433600-17437069 | WT | MIOX | OK |
| AT1G02610 | AT1G02610 | -       | 1:553049-555994     | WT | MIOX | OK |
| AT5G50400 | AT5G50400 | PAP27   | 5:20523574-20526469 | WT | MIOX | OK |
| AT3G52110 | AT3G52110 | -       | 3:19323331-19325713 | WT | MIOX | OK |
| AT1G01020 | AT1G01020 | ARV1    | 1:5927-8737         | WT | MIOX | OK |
| AT5G18920 | AT5G18920 | -       | 5:6310063-6310846   | WT | MIOX | OK |
| AT4G17486 | AT4G17486 | -       | 4:9749727-9751709   | WT | MIOX | OK |
| AT5G24655 | AT5G24655 | LSU4    | 5:8440693-8441218   | WT | MIOX | OK |
| AT1G55370 | AT1G55370 | NDF5    | 1:20674782-20676449 | WT | MIOX | OK |
| AT4G34000 | AT4G34000 | ABF3    | 4:16295429-16298255 | WT | MIOX | OK |
| AT5G56520 | AT5G56520 | -       | 5:22885191-22886541 | WT | MIOX | OK |
| AT2G43550 | AT2G43550 | ATTI6   | 2:18073233-18075498 | WT | MIOX | OK |
| AT1G08460 | AT1G08460 | HDA8    | 1:2672450-2674628   | WT | MIOX | OK |
| AT3G62550 | AT3G62550 | -       | 3:23135983-23137173 | WT | MIOX | OK |
| AT1G75240 | AT1G75240 | ZHD5    | 1:28241071-28242756 | WT | MIOX | OK |
| AT4G36840 | AT4G36840 | -       | 4:17351352-17352945 | WT | MIOX | OK |
| AT1G53030 | AT1G53030 | COX17-2 | 1:19760000-19761452 | WT | MIOX | OK |
| AT4G31580 | AT4G31580 | RSZ22   | 4:15306653-15308347 | WT | MIOX | OK |
| AT4G24220 | AT4G24220 | VEP1    | 4:12564944-12568846 | WT | MIOX | OK |
| AT1G13190 | AT1G13190 | -       | 1:4498880-4503591   | WT | MIOX | OK |
| AT5G58070 | AT5G58070 | ATTIL   | 5:23498138-23501209 | WT | MIOX | OK |
| AT5G18065 | AT5G18065 | -       | 5:5978677-5980376   | WT | MIOX | OK |
| AT5G61820 | AT5G61820 | -       | 5:24834316-24836694 | WT | MIOX | OK |
| AT5G04340 | AT5G04340 | ZAT6    | 5:1216130-1217106   | WT | MIOX | OK |
| AT5G49000 | AT5G49000 | -       | 5:19864512-19865755 | WT | MIOX | OK |
| AT2G21060 | AT2G21060 | CSP4    | 2:9036792-9037650   | WT | MIOX | OK |
| AT1G02205 | AT1G02205 | CER1    | 1:418747-422438     | WT | MIOX | OK |

|           |           |         |                     |    |      |    |
|-----------|-----------|---------|---------------------|----|------|----|
| AT2G22980 | AT2G22980 | SCPL13  | 2:9778876-9783251   | WT | MIOX | OK |
| AT4G31270 | AT4G31270 | -       | 4:15183187-15184961 | WT | MIOX | OK |
| AT5G02170 | AT5G02170 | -       | 5:427832-430695     | WT | MIOX | OK |
| AT3G55460 | AT3G55460 | SCL30   | 3:20560807-20563762 | WT | MIOX | OK |
| AT2G31840 | AT2G31840 | -       | 2:13537911-13539758 | WT | MIOX | OK |
| AT1G34315 | AT1G34315 | -       | 1:12514105-12516521 | WT | MIOX | OK |
| AT1G67195 | AT1G67195 | MIR414  | 1:25137110-25137937 | WT | MIOX | OK |
| AT5G62360 | AT5G62360 | -       | 5:25040648-25041462 | WT | MIOX | OK |
| AT1G76200 | AT1G76200 | -       | 1:28593249-28594742 | WT | MIOX | OK |
| AT5G51720 | AT5G51720 | NEET    | 5:21009591-21010345 | WT | MIOX | OK |
| AT5G17520 | AT5G17520 | MEX1    | 5:5772582-5775345   | WT | MIOX | OK |
| AT3G62190 | AT3G62190 | -       | 3:23021039-23023332 | WT | MIOX | OK |
| AT1G55460 | AT1G55460 | -       | 1:20707477-20709024 | WT | MIOX | OK |
| AT2G23610 | AT2G23610 | MES3    | 2:10044178-10046532 | WT | MIOX | OK |
| AT4G16680 | AT4G16680 | -       | 4:9385218-9390774   | WT | MIOX | OK |
| AT4G09020 | AT4G09020 | ISA3    | 4:5784073-5789002   | WT | MIOX | OK |
| AT5G51795 | AT5G51795 | -       | 5:21043082-21044194 | WT | MIOX | OK |
| AT1G10657 | AT1G10657 | -       | 1:3530466-3531842   | WT | MIOX | OK |
| AT2G07711 | AT2G07711 | -       | 2:3397157-3399434   | WT | MIOX | OK |
| AT2G42610 | AT2G42610 | LSH10   | 2:17747916-17750440 | WT | MIOX | OK |
| AT4G13520 | AT4G13520 | SMAP1   | 4:7864393-7864924   | WT | MIOX | OK |
| AT5G03830 | AT5G03830 | -       | 5:1018337-1020460   | WT | MIOX | OK |
| AT2G41312 | AT2G41312 | -       | 2:17225522-17226693 | WT | MIOX | OK |
| AT1G80890 | AT1G80890 | -       | 1:30397127-30400340 | WT | MIOX | OK |
| AT1G75360 | AT1G75360 | -       | 1:28274587-28275990 | WT | MIOX | OK |
| AT1G70600 | AT1G70600 | RPL27AC | 1:26620922-26621659 | WT | MIOX | OK |
| AT5G13310 | AT5G13310 | -       | 5:4263492-4265337   | WT | MIOX | OK |
| AT5G20670 | AT5G20670 | -       | 5:6993113-6993873   | WT | MIOX | OK |
| AT2G17350 | AT2G17350 | -       | 2:7545537-7546374   | WT | MIOX | OK |
| AT1G52410 | AT1G52410 | TSA1    | 1:19520727-19525624 | WT | MIOX | OK |
| AT1G27300 | AT1G27300 | -       | 1:9483156-9485896   | WT | MIOX | OK |
| AT3G46640 | AT3G46640 | LUX     | 3:17183069-17185218 | WT | MIOX | OK |
| AT4G12790 | AT4G12790 | -       | 4:7517054-7519422   | WT | MIOX | OK |
| AT1G33990 | AT1G33990 | MES14   | 1:12355567-12358966 | WT | MIOX | OK |
| AT5G62390 | AT5G62390 | BAG7    | 5:25051977-25054289 | WT | MIOX | OK |
| AT4G30680 | AT4G30680 | -       | 4:14958686-14960321 | WT | MIOX | OK |
| AT5G13760 | AT5G13760 | -       | 5:4442013-4444935   | WT | MIOX | OK |
| AT1G19200 | AT1G19200 | -       | 1:6625019-6625856   | WT | MIOX | OK |
| AT1G71170 | AT1G71170 | -       | 1:26830668-26832099 | WT | MIOX | OK |
| AT5G60850 | AT5G60850 | DOF5.4  | 5:24480448-24481873 | WT | MIOX | OK |
| AT1G21525 | AT1G21525 | -       | 1:7537086-7537649   | WT | MIOX | OK |

|           |           |             |                     |    |      |    |
|-----------|-----------|-------------|---------------------|----|------|----|
| AT1G69360 | AT1G69360 | -           | 1:26072283-26076254 | WT | MIOX | OK |
| AT1G07660 | AT1G07660 | -           | 1:2368836-2369734   | WT | MIOX | OK |
| AT2G45070 | AT2G45070 | SEC61 BETA  | 2:18587016-18588377 | WT | MIOX | OK |
| AT1G09970 | AT1G09970 | LRR XI-23   | 1:3252239-3255693   | WT | MIOX | OK |
| AT1G30120 | AT1G30120 | PDH-E1 BETA | 1:10584159-10586635 | WT | MIOX | OK |



| value_1   | value_2  | log2(fold_change) | test_stat | p_value  | q_value     |
|-----------|----------|-------------------|-----------|----------|-------------|
| 0         | 573.267  | inf               | #NAME?    | 5.00E-05 | 0.000323538 |
| 0         | 293.987  | inf               | #NAME?    | 0.0004   | 0.00202805  |
| 0         | 121.14   | inf               | #NAME?    | 0.0011   | 0.004771    |
| 0         | 101.06   | inf               | #NAME?    | 5.00E-05 | 0.000323538 |
| 0         | 57.1551  | inf               | #NAME?    | 0.00685  | 0.0223077   |
| 0         | 45.6873  | inf               | #NAME?    | 0.01335  | 0.0382464   |
| 0         | 42.9371  | inf               | #NAME?    | 5.00E-05 | 0.000323538 |
| 0         | 37.3157  | inf               | #NAME?    | 5.00E-05 | 0.000323538 |
| 0         | 22.0977  | inf               | #NAME?    | 0.00065  | 0.00304972  |
| 0         | 18.9285  | inf               | #NAME?    | 5.00E-05 | 0.000323538 |
| 0         | 4.3813   | inf               | #NAME?    | 5.00E-05 | 0.000323538 |
| 0         | 3.44728  | inf               | #NAME?    | 0.00015  | 0.000860006 |
| 0         | 2.34922  | inf               | #NAME?    | 5.00E-05 | 0.000323538 |
| 0         | 2.00939  | inf               | #NAME?    | 0.01275  | 0.0367973   |
| 0         | 1.68706  | inf               | #NAME?    | 5.00E-05 | 0.000323538 |
| 0         | 1.55652  | inf               | #NAME?    | 5.00E-05 | 0.000323538 |
| 0         | 1.50844  | inf               | #NAME?    | 5.00E-05 | 0.000323538 |
| 0         | 1.36645  | inf               | #NAME?    | 5.00E-05 | 0.000323538 |
| 0         | 1.28804  | inf               | #NAME?    | 5.00E-05 | 0.000323538 |
| 0         | 1.24987  | inf               | #NAME?    | 5.00E-05 | 0.000323538 |
| 0         | 1.1293   | inf               | #NAME?    | 5.00E-05 | 0.000323538 |
| 0         | 1.11603  | inf               | #NAME?    | 5.00E-05 | 0.000323538 |
| 0         | 1.09758  | inf               | #NAME?    | 5.00E-05 | 0.000323538 |
| 0         | 1.06186  | inf               | #NAME?    | 5.00E-05 | 0.000323538 |
| 0         | 0.970372 | inf               | #NAME?    | 5.00E-05 | 0.000323538 |
| 0         | 0.896598 | inf               | #NAME?    | 5.00E-05 | 0.000323538 |
| 0         | 0.867396 | inf               | #NAME?    | 5.00E-05 | 0.000323538 |
| 0         | 0.84701  | inf               | #NAME?    | 5.00E-05 | 0.000323538 |
| 0         | 0.811483 | inf               | #NAME?    | 5.00E-05 | 0.000323538 |
| 0.353211  | 682.301  | 10.9157           | 14.6371   | 5.00E-05 | 0.000323538 |
| 0.0159813 | 1.31517  | 6.36272           | 0.928563  | 0.0113   | 0.0333998   |
| 0.0479418 | 1.95009  | 5.34611           | 2.62131   | 0.0136   | 0.0388656   |
| 0.0547354 | 1.18341  | 4.43433           | 0.752556  | 0.01     | 0.0302388   |
| 0.253256  | 3.98981  | 3.97765           | 3.15363   | 0.00495  | 0.0169815   |
| 2287.48   | 34065    | 3.89646           | 8.34888   | 5.00E-05 | 0.000323538 |
| 0.98407   | 14.2141  | 3.85242           | 6.34318   | 5.00E-05 | 0.000323538 |
| 0.185518  | 2.42348  | 3.70745           | 4.26497   | 5.00E-05 | 0.000323538 |
| 6.0604    | 76.857   | 3.66469           | 7.71807   | 5.00E-05 | 0.000323538 |
| 0.140031  | 1.74423  | 3.63877           | 0.395954  | 0.01195  | 0.0349665   |
| 0.927532  | 11.5055  | 3.63278           | 2.94101   | 0.0056   | 0.0188487   |

|           |          |         |         |          |             |
|-----------|----------|---------|---------|----------|-------------|
| 0.17359   | 2.0336   | 3.55028 | 2.9361  | 5.00E-05 | 0.000323538 |
| 0.138892  | 1.584    | 3.51154 | 2.64758 | 0.0005   | 0.00244658  |
| 0.0733797 | 0.819288 | 3.48092 | 1.91517 | 0.0004   | 0.00202805  |
| 0.192715  | 2.11382  | 3.45531 | 3.22774 | 5.00E-05 | 0.000323538 |
| 0.0832041 | 0.895213 | 3.4275  | 2.43489 | 0.00065  | 0.00304972  |
| 0.20937   | 2.20337  | 3.39559 | 3.57971 | 5.00E-05 | 0.000323538 |
| 0.709374  | 7.32925  | 3.36905 | 2.97064 | 0.01675  | 0.0459306   |
| 0.401914  | 4.14394  | 3.36605 | 2.9621  | 0.01535  | 0.042762    |
| 0.938877  | 8.88959  | 3.24311 | 2.49212 | 0.0003   | 0.00157947  |
| 1.20826   | 11.2854  | 3.22345 | 6.4618  | 5.00E-05 | 0.000323538 |
| 0.544431  | 4.89143  | 3.16744 | 3.08485 | 5.00E-05 | 0.000323538 |
| 27.4579   | 244.812  | 3.15638 | 8.75869 | 5.00E-05 | 0.000323538 |
| 1.5101    | 13.3398  | 3.14301 | 5.22734 | 5.00E-05 | 0.000323538 |
| 1.00103   | 8.84058  | 3.14265 | 6.25586 | 5.00E-05 | 0.000323538 |
| 9.50398   | 83.1937  | 3.12987 | 7.82543 | 5.00E-05 | 0.000323538 |
| 0.151221  | 1.24865  | 3.04564 | 2.1232  | 5.00E-05 | 0.000323538 |
| 2.1752    | 17.9322  | 3.04333 | 5.61222 | 5.00E-05 | 0.000323538 |
| 1.35362   | 10.9733  | 3.01911 | 3.8132  | 5.00E-05 | 0.000323538 |
| 1.14939   | 9.19208  | 2.99952 | 4.15477 | 5.00E-05 | 0.000323538 |
| 0.183429  | 1.44691  | 2.97969 | 2.03582 | 0.00025  | 0.00134358  |
| 1.62652   | 12.7367  | 2.96913 | 4.20209 | 5.00E-05 | 0.000323538 |
| 80.2761   | 616.47   | 2.94099 | 2.71109 | 5.00E-05 | 0.000323538 |
| 1.4924    | 11.3597  | 2.92822 | 4.83523 | 5.00E-05 | 0.000323538 |
| 0.893799  | 6.68356  | 2.90259 | 3.2635  | 5.00E-05 | 0.000323538 |
| 0.132879  | 0.96785  | 2.86467 | 2.17728 | 0.0002   | 0.00110793  |
| 0.931611  | 6.7579   | 2.85878 | 4.70271 | 5.00E-05 | 0.000323538 |
| 0.53033   | 3.78092  | 2.83377 | 7.55022 | 5.00E-05 | 0.000323538 |
| 0.753468  | 5.32174  | 2.82028 | 4.15478 | 5.00E-05 | 0.000323538 |
| 0.186391  | 1.28953  | 2.79044 | 2.03188 | 0.00275  | 0.0103401   |
| 105.612   | 723.147  | 2.77552 | 5.05948 | 5.00E-05 | 0.000323538 |
| 0.285717  | 1.93162  | 2.75716 | 5.7236  | 5.00E-05 | 0.000323538 |
| 0.591807  | 3.85216  | 2.70247 | 2.99567 | 5.00E-05 | 0.000323538 |
| 0.196101  | 1.25413  | 2.67701 | 3.52341 | 5.00E-05 | 0.000323538 |
| 2.26611   | 14.3562  | 2.66339 | 4.3645  | 5.00E-05 | 0.000323538 |
| 0.25492   | 1.61084  | 2.6597  | 2.782   | 5.00E-05 | 0.000323538 |
| 0.206237  | 1.29719  | 2.65302 | 1.83817 | 0.00065  | 0.00304972  |
| 1.25585   | 7.83442  | 2.64116 | 3.15415 | 5.00E-05 | 0.000323538 |
| 0.147076  | 0.896607 | 2.60791 | 2.25544 | 5.00E-05 | 0.000323538 |
| 0.941841  | 5.703    | 2.59817 | 4.06792 | 5.00E-05 | 0.000323538 |
| 7.29313   | 43.9515  | 2.5913  | 5.92106 | 5.00E-05 | 0.000323538 |
| 0.345371  | 2.07321  | 2.58565 | 1.75739 | 0.001    | 0.00440912  |

|          |          |         |         |          |             |
|----------|----------|---------|---------|----------|-------------|
| 0.402674 | 2.3995   | 2.57505 | 2.94577 | 5.00E-05 | 0.000323538 |
| 3.67832  | 21.7473  | 2.56372 | 7.20676 | 5.00E-05 | 0.000323538 |
| 1.98711  | 11.6592  | 2.55272 | 4.7252  | 5.00E-05 | 0.000323538 |
| 0.319357 | 1.79457  | 2.4904  | 3.06512 | 5.00E-05 | 0.000323538 |
| 1.49095  | 8.21638  | 2.46227 | 1.98505 | 0.0034   | 0.012418    |
| 0.159809 | 0.87258  | 2.44894 | 1.69828 | 0.0046   | 0.0159747   |
| 6.16173  | 32.3744  | 2.39344 | 3.0496  | 5.00E-05 | 0.000323538 |
| 0.211995 | 1.11074  | 2.38942 | 2.31284 | 5.00E-05 | 0.000323538 |
| 14.2276  | 74.5303  | 2.38914 | 7.57498 | 5.00E-05 | 0.000323538 |
| 0.572603 | 2.94659  | 2.36344 | 1.97119 | 0.00065  | 0.00304972  |
| 34.9886  | 179.847  | 2.36181 | 6.77061 | 0.00515  | 0.0175593   |
| 0.230491 | 1.17329  | 2.34778 | 3.01555 | 5.00E-05 | 0.000323538 |
| 158.355  | 801.01   | 2.33865 | 8.79167 | 5.00E-05 | 0.000323538 |
| 3.45659  | 17.4298  | 2.33413 | 5.03658 | 5.00E-05 | 0.000323538 |
| 1.78523  | 8.93366  | 2.32314 | 5.15532 | 5.00E-05 | 0.000323538 |
| 0.629075 | 3.13726  | 2.3182  | 2.04289 | 0.00065  | 0.00304972  |
| 0.155728 | 0.773243 | 2.3119  | 1.67491 | 0.00065  | 0.00304972  |
| 2.38531  | 11.7171  | 2.29636 | 6.23517 | 5.00E-05 | 0.000323538 |
| 0.414581 | 2.01752  | 2.28286 | 2.78176 | 5.00E-05 | 0.000323538 |
| 0.721171 | 3.50609  | 2.28145 | 2.61745 | 5.00E-05 | 0.000323538 |
| 7.57761  | 36.7893  | 2.27947 | 4.66125 | 5.00E-05 | 0.000323538 |
| 0.239463 | 1.16137  | 2.27795 | 1.75679 | 0.0009   | 0.00404197  |
| 5.81499  | 27.9559  | 2.26531 | 5.6797  | 5.00E-05 | 0.000323538 |
| 1.37647  | 6.54407  | 2.24922 | 4.2786  | 5.00E-05 | 0.000323538 |
| 1.08036  | 5.11541  | 2.24334 | 1.76235 | 0.0017   | 0.00689005  |
| 0.775524 | 3.668    | 2.24175 | 3.96465 | 5.00E-05 | 0.000323538 |
| 0.264825 | 1.24552  | 2.23363 | 1.852   | 0.00045  | 0.00223165  |
| 1.95251  | 9.11088  | 2.22226 | 2.96239 | 5.00E-05 | 0.000323538 |
| 0.817548 | 3.79912  | 2.21629 | 2.40067 | 0.0021   | 0.00824731  |
| 2.30983  | 10.6364  | 2.20315 | 4.33481 | 5.00E-05 | 0.000323538 |
| 0.588076 | 2.70166  | 2.19977 | 3.86776 | 5.00E-05 | 0.000323538 |
| 0.402368 | 1.84794  | 2.19933 | 1.86703 | 0.00045  | 0.00223165  |
| 2.43699  | 11.0928  | 2.18646 | 5.14729 | 5.00E-05 | 0.000323538 |
| 1.13712  | 5.15419  | 2.18036 | 1.9643  | 0.0015   | 0.00619987  |
| 18.5686  | 83.8534  | 2.17501 | 4.33037 | 5.00E-05 | 0.000323538 |
| 0.969827 | 4.34721  | 2.16429 | 5.00857 | 5.00E-05 | 0.000323538 |
| 1.30666  | 5.79852  | 2.1498  | 3.97837 | 5.00E-05 | 0.000323538 |
| 1.99845  | 8.86566  | 2.14935 | 2.41149 | 5.00E-05 | 0.000323538 |
| 3.18071  | 14.0689  | 2.14509 | 4.12151 | 5.00E-05 | 0.000323538 |
| 10.6034  | 46.7958  | 2.14185 | 7.81936 | 5.00E-05 | 0.000323538 |
| 0.723502 | 3.18946  | 2.14024 | 1.86783 | 0.0007   | 0.00324944  |

|          |          |         |         |          |             |
|----------|----------|---------|---------|----------|-------------|
| 14.5151  | 63.8183  | 2.13642 | 6.1104  | 5.00E-05 | 0.000323538 |
| 0.239101 | 1.05032  | 2.13513 | 1.97618 | 0.0001   | 0.000602691 |
| 21.1909  | 93.0583  | 2.13469 | 3.83891 | 5.00E-05 | 0.000323538 |
| 1.22666  | 5.36941  | 2.13003 | 3.54546 | 5.00E-05 | 0.000323538 |
| 41.1137  | 179.092  | 2.12301 | 6.66682 | 5.00E-05 | 0.000323538 |
| 49.798   | 216.752  | 2.12189 | 8.94868 | 5.00E-05 | 0.000323538 |
| 0.744115 | 3.2328   | 2.11919 | 1.6922  | 0.00405  | 0.0143829   |
| 0.57791  | 2.5002   | 2.11313 | 2.31728 | 5.00E-05 | 0.000323538 |
| 15.4641  | 66.792   | 2.11075 | 7.16523 | 5.00E-05 | 0.000323538 |
| 0.327047 | 1.3991   | 2.09693 | 1.80539 | 0.00045  | 0.00223165  |
| 0.353158 | 1.50723  | 2.09352 | 2.70224 | 5.00E-05 | 0.000323538 |
| 25.1582  | 106.366  | 2.07994 | 5.89983 | 5.00E-05 | 0.000323538 |
| 1.66679  | 7.01236  | 2.07282 | 4.46972 | 5.00E-05 | 0.000323538 |
| 1.10885  | 4.59296  | 2.05035 | 3.59332 | 5.00E-05 | 0.000323538 |
| 16.0076  | 66.0509  | 2.04482 | 6.47239 | 5.00E-05 | 0.000323538 |
| 0.926467 | 3.81999  | 2.04376 | 2.57879 | 5.00E-05 | 0.000323538 |
| 6.45239  | 26.5589  | 2.04129 | 8.36361 | 5.00E-05 | 0.000323538 |
| 0.888959 | 3.65427  | 2.03939 | 1.91417 | 0.00175  | 0.00705687  |
| 9.04005  | 37.153   | 2.03907 | 6.10336 | 5.00E-05 | 0.000323538 |
| 226.201  | 928.702  | 2.03761 | 5.14692 | 5.00E-05 | 0.000323538 |
| 2.09043  | 8.57532  | 2.03639 | 5.26759 | 5.00E-05 | 0.000323538 |
| 0.941738 | 3.85016  | 2.03152 | 3.36665 | 5.00E-05 | 0.000323538 |
| 0.550556 | 2.24693  | 2.029   | 2.83671 | 5.00E-05 | 0.000323538 |
| 0.26062  | 1.06312  | 2.02828 | 1.37692 | 0.00295  | 0.0109775   |
| 39.5271  | 160.194  | 2.01891 | 2.06914 | 0.00035  | 0.00180697  |
| 0.275013 | 1.11121  | 2.01455 | 3.04489 | 5.00E-05 | 0.000323538 |
| 8.03985  | 32.4104  | 2.01122 | 3.41943 | 5.00E-05 | 0.000323538 |
| 27.7864  | 111.545  | 2.00517 | 6.05131 | 5.00E-05 | 0.000323538 |
| 0.951671 | 3.80279  | 1.99852 | 1.99473 | 0.0003   | 0.00157947  |
| 84.0483  | 334.538  | 1.99288 | 1.71911 | 0.0016   | 0.00653959  |
| 0.184898 | 0.735426 | 1.99185 | 1.44939 | 0.0036   | 0.0130421   |
| 170.343  | 676.495  | 1.98964 | 5.79536 | 5.00E-05 | 0.000323538 |
| 2.03059  | 8.04965  | 1.98703 | 2.13593 | 5.00E-05 | 0.000323538 |
| 15.5154  | 61.2099  | 1.98007 | 6.94576 | 5.00E-05 | 0.000323538 |
| 0.791048 | 3.09212  | 1.96676 | 2.6936  | 5.00E-05 | 0.000323538 |
| 0.544183 | 2.12511  | 1.96538 | 2.48695 | 5.00E-05 | 0.000323538 |
| 0.61876  | 2.38766  | 1.94814 | 2.93846 | 5.00E-05 | 0.000323538 |
| 0.81771  | 3.15247  | 1.94682 | 2.18222 | 5.00E-05 | 0.000323538 |
| 17.4691  | 66.7245  | 1.93341 | 5.94457 | 5.00E-05 | 0.000323538 |
| 5.06538  | 19.3254  | 1.93176 | 1.7781  | 0.0024   | 0.00925333  |
| 0.768601 | 2.9286   | 1.9299  | 2.79108 | 5.00E-05 | 0.000323538 |

|          |          |         |         |          |             |
|----------|----------|---------|---------|----------|-------------|
| 0.61883  | 2.33663  | 1.91681 | 2.86663 | 5.00E-05 | 0.000323538 |
| 0.243071 | 0.915993 | 1.91396 | 2.14278 | 5.00E-05 | 0.000323538 |
| 4.2106   | 15.8615  | 1.91343 | 1.26382 | 0.0169   | 0.046259    |
| 3.37656  | 12.6927  | 1.91038 | 4.64928 | 5.00E-05 | 0.000323538 |
| 5.81008  | 21.8296  | 1.90966 | 5.45715 | 5.00E-05 | 0.000323538 |
| 2.91505  | 10.9461  | 1.90882 | 4.82797 | 5.00E-05 | 0.000323538 |
| 0.208951 | 0.779548 | 1.89947 | 1.21333 | 0.00785  | 0.0249407   |
| 0.818324 | 3.04293  | 1.89472 | 2.68788 | 5.00E-05 | 0.000323538 |
| 7.80482  | 28.9627  | 1.89176 | 5.86617 | 5.00E-05 | 0.000323538 |
| 57.0588  | 211.391  | 1.88939 | 5.87022 | 5.00E-05 | 0.000323538 |
| 0.19639  | 0.726272 | 1.88678 | 1.32809 | 0.01665  | 0.0457178   |
| 0.694514 | 2.55848  | 1.88121 | 3.34151 | 5.00E-05 | 0.000323538 |
| 91.4128  | 334.084  | 1.86974 | 4.94137 | 5.00E-05 | 0.000323538 |
| 1.34002  | 4.88404  | 1.86582 | 2.52468 | 5.00E-05 | 0.000323538 |
| 0.253613 | 0.922122 | 1.86233 | 1.46638 | 0.0023   | 0.00891456  |
| 0.338891 | 1.22721  | 1.85649 | 2.41478 | 5.00E-05 | 0.000323538 |
| 1.08874  | 3.92757  | 1.85097 | 2.22428 | 5.00E-05 | 0.000323538 |
| 4.18762  | 15.0513  | 1.84569 | 2.78206 | 5.00E-05 | 0.000323538 |
| 0.393565 | 1.41348  | 1.84458 | 1.50991 | 0.00355  | 0.0128889   |
| 0.323102 | 1.15889  | 1.84268 | 1.51358 | 0.00055  | 0.00265935  |
| 0.501753 | 1.79741  | 1.84087 | 2.3923  | 5.00E-05 | 0.000323538 |
| 0.82535  | 2.9499   | 1.83759 | 2.14545 | 0.00025  | 0.00134358  |
| 13.0496  | 46.5077  | 1.83347 | 5.73629 | 5.00E-05 | 0.000323538 |
| 7.38153  | 26.2117  | 1.82822 | 3.97452 | 5.00E-05 | 0.000323538 |
| 0.551068 | 1.93028  | 1.80851 | 1.75653 | 0.0002   | 0.00110793  |
| 0.216276 | 0.75341  | 1.80056 | 1.4949  | 0.0023   | 0.00891456  |
| 0.308181 | 1.07221  | 1.79873 | 1.54238 | 0.0037   | 0.0133412   |
| 0.529842 | 1.83909  | 1.79536 | 2.93993 | 5.00E-05 | 0.000323538 |
| 43.9031  | 151.792  | 1.7897  | 6.56103 | 5.00E-05 | 0.000323538 |
| 0.462864 | 1.59599  | 1.78579 | 2.2695  | 5.00E-05 | 0.000323538 |
| 1.1085   | 3.80499  | 1.77928 | 2.84136 | 5.00E-05 | 0.000323538 |
| 1.17389  | 4.01251  | 1.7732  | 1.5589  | 0.0065   | 0.021323    |
| 1.326    | 4.53058  | 1.77261 | 2.39325 | 5.00E-05 | 0.000323538 |
| 0.459433 | 1.56868  | 1.77163 | 1.91376 | 0.0006   | 0.00285599  |
| 0.291002 | 0.987773 | 1.76315 | 2.02754 | 5.00E-05 | 0.000323538 |
| 64.7317  | 219.677  | 1.76284 | 5.06502 | 5.00E-05 | 0.000323538 |
| 47.4251  | 160.684  | 1.76051 | 6.668   | 5.00E-05 | 0.000323538 |
| 12.8868  | 43.4831  | 1.75456 | 5.07415 | 5.00E-05 | 0.000323538 |
| 1.67197  | 5.62809  | 1.75109 | 3.88297 | 5.00E-05 | 0.000323538 |
| 5.34831  | 17.9255  | 1.74486 | 6.11463 | 5.00E-05 | 0.000323538 |
| 9.31623  | 31.2232  | 1.7448  | 6.48674 | 5.00E-05 | 0.000323538 |

|          |         |         |         |          |             |
|----------|---------|---------|---------|----------|-------------|
| 0.441193 | 1.47792 | 1.74409 | 2.62502 | 5.00E-05 | 0.000323538 |
| 3.02804  | 10.1056 | 1.7387  | 2.81193 | 5.00E-05 | 0.000323538 |
| 1.22898  | 4.09258 | 1.73555 | 1.90998 | 0.0008   | 0.00364455  |
| 3.88634  | 12.9066 | 1.73162 | 5.10564 | 5.00E-05 | 0.000323538 |
| 2.54046  | 8.42818 | 1.73013 | 1.43471 | 0.00435  | 0.015277    |
| 1.72394  | 5.71555 | 1.72918 | 3.4625  | 5.00E-05 | 0.000323538 |
| 1.57081  | 5.19398 | 1.72533 | 2.52217 | 5.00E-05 | 0.000323538 |
| 0.442031 | 1.46132 | 1.72505 | 1.30906 | 0.0033   | 0.012113    |
| 10.9689  | 36.111  | 1.71902 | 4.69179 | 5.00E-05 | 0.000323538 |
| 0.318844 | 1.04751 | 1.71604 | 1.84907 | 0.0003   | 0.00157947  |
| 10.1921  | 33.4732 | 1.71555 | 5.22879 | 5.00E-05 | 0.000323538 |
| 2.49863  | 8.15899 | 1.70725 | 3.39732 | 5.00E-05 | 0.000323538 |
| 14.7639  | 48.1855 | 1.70653 | 6.78251 | 5.00E-05 | 0.000323538 |
| 1.00536  | 3.27973 | 1.70587 | 1.92107 | 0.00025  | 0.00134358  |
| 23.4725  | 76.4419 | 1.70339 | 6.05211 | 5.00E-05 | 0.000323538 |
| 7.74896  | 25.2301 | 1.70307 | 6.1759  | 5.00E-05 | 0.000323538 |
| 0.735734 | 2.39519 | 1.70289 | 2.54729 | 5.00E-05 | 0.000323538 |
| 13.3285  | 43.2963 | 1.69972 | 4.92697 | 5.00E-05 | 0.000323538 |
| 1.5718   | 5.10355 | 1.69908 | 3.5396  | 5.00E-05 | 0.000323538 |
| 6.85082  | 22.224  | 1.69777 | 1.56556 | 0.00055  | 0.00265935  |
| 0.639633 | 2.06216 | 1.68884 | 1.40469 | 0.0025   | 0.00955264  |
| 2.89743  | 9.33531 | 1.68793 | 1.52982 | 0.00575  | 0.0192407   |
| 2.48166  | 7.96344 | 1.68209 | 2.1857  | 5.00E-05 | 0.000323538 |
| 0.892652 | 2.86165 | 1.68068 | 2.60928 | 5.00E-05 | 0.000323538 |
| 0.947518 | 3.03031 | 1.67724 | 1.72258 | 0.00115  | 0.00495975  |
| 2.28829  | 7.31251 | 1.6761  | 4.49802 | 5.00E-05 | 0.000323538 |
| 22.3083  | 70.6986 | 1.6641  | 6.52002 | 5.00E-05 | 0.000323538 |
| 0.687557 | 2.17434 | 1.66102 | 2.54568 | 5.00E-05 | 0.000323538 |
| 3.6823   | 11.63   | 1.65918 | 3.41138 | 5.00E-05 | 0.000323538 |
| 0.790831 | 2.4952  | 1.65771 | 1.94918 | 5.00E-05 | 0.000323538 |
| 6.75485  | 21.2423 | 1.65295 | 5.06796 | 5.00E-05 | 0.000323538 |
| 22.1368  | 69.6126 | 1.65291 | 5.40444 | 5.00E-05 | 0.000323538 |
| 5.53757  | 17.3737 | 1.64958 | 4.86022 | 5.00E-05 | 0.000323538 |
| 4.58899  | 14.3955 | 1.64937 | 3.41192 | 5.00E-05 | 0.000323538 |
| 3.2882   | 10.2747 | 1.64373 | 3.52122 | 5.00E-05 | 0.000323538 |
| 11.9417  | 37.2323 | 1.64054 | 2.13417 | 0.0013   | 0.00548431  |
| 23.4334  | 72.9047 | 1.63744 | 4.84178 | 5.00E-05 | 0.000323538 |
| 4.90108  | 15.1668 | 1.62974 | 2.00116 | 0.0004   | 0.00202805  |
| 41.2     | 126.887 | 1.62283 | 5.95353 | 5.00E-05 | 0.000323538 |
| 3.16789  | 9.72715 | 1.6185  | 3.9689  | 5.00E-05 | 0.000323538 |
| 6.83518  | 20.9368 | 1.61499 | 4.40644 | 5.00E-05 | 0.000323538 |

|          |          |         |         |          |             |
|----------|----------|---------|---------|----------|-------------|
| 0.373235 | 1.14225  | 1.61372 | 1.35101 | 0.0067   | 0.021893    |
| 11.8911  | 36.3465  | 1.61193 | 5.28974 | 5.00E-05 | 0.000323538 |
| 1.203    | 3.65707  | 1.60405 | 2.90249 | 5.00E-05 | 0.000323538 |
| 1.91843  | 5.82234  | 1.60167 | 1.39653 | 0.01145  | 0.0337563   |
| 0.462053 | 1.3965   | 1.59569 | 1.13433 | 0.0121   | 0.0352929   |
| 1.84811  | 5.5715   | 1.59201 | 3.53307 | 5.00E-05 | 0.000323538 |
| 3.46205  | 10.432   | 1.59132 | 5.24696 | 5.00E-05 | 0.000323538 |
| 1.66413  | 5.01176  | 1.59055 | 3.87864 | 5.00E-05 | 0.000323538 |
| 12.192   | 36.6784  | 1.589   | 5.15093 | 5.00E-05 | 0.000323538 |
| 0.821816 | 2.46766  | 1.58626 | 1.73754 | 0.0004   | 0.00202805  |
| 12.2573  | 36.7691  | 1.58486 | 5.20101 | 5.00E-05 | 0.000323538 |
| 3.33136  | 9.98369  | 1.58346 | 3.59777 | 5.00E-05 | 0.000323538 |
| 3.35838  | 10.0643  | 1.58341 | 3.33915 | 5.00E-05 | 0.000323538 |
| 1.47917  | 4.42437  | 1.58068 | 3.02023 | 5.00E-05 | 0.000323538 |
| 0.397891 | 1.18966  | 1.5801  | 1.88982 | 5.00E-05 | 0.000323538 |
| 2.39306  | 7.14855  | 1.57879 | 4.05077 | 5.00E-05 | 0.000323538 |
| 0.436587 | 1.30263  | 1.57709 | 1.77225 | 0.0002   | 0.00110793  |
| 0.944481 | 2.81792  | 1.57704 | 2.65539 | 5.00E-05 | 0.000323538 |
| 0.691753 | 2.06352  | 1.57678 | 1.8047  | 0.0002   | 0.00110793  |
| 0.787283 | 2.34336  | 1.57363 | 1.70667 | 0.00035  | 0.00180697  |
| 1.01791  | 3.02719  | 1.57236 | 1.56178 | 0.00105  | 0.00459538  |
| 0.277686 | 0.824856 | 1.57069 | 1.18817 | 0.00825  | 0.0259512   |
| 0.456012 | 1.35321  | 1.56924 | 2.27047 | 5.00E-05 | 0.000323538 |
| 1.9102   | 5.65528  | 1.56587 | 2.99082 | 5.00E-05 | 0.000323538 |
| 3.49425  | 10.3325  | 1.56413 | 2.7879  | 5.00E-05 | 0.000323538 |
| 55.3334  | 163.244  | 1.5608  | 4.57091 | 5.00E-05 | 0.000323538 |
| 0.410759 | 1.21035  | 1.55906 | 1.5081  | 0.0027   | 0.0101896   |
| 8.02205  | 23.5771  | 1.55534 | 5.69689 | 5.00E-05 | 0.000323538 |
| 1.00349  | 2.94771  | 1.55457 | 2.13043 | 5.00E-05 | 0.000323538 |
| 4.22735  | 12.4105  | 1.55374 | 3.62363 | 5.00E-05 | 0.000323538 |
| 1.2013   | 3.52081  | 1.55131 | 1.908   | 5.00E-05 | 0.000323538 |
| 7.60117  | 22.2699  | 1.5508  | 4.81554 | 5.00E-05 | 0.000323538 |
| 5.85279  | 17.1273  | 1.5491  | 6.5075  | 5.00E-05 | 0.000323538 |
| 19.6761  | 57.5665  | 1.54878 | 5.9267  | 5.00E-05 | 0.000323538 |
| 1.86871  | 5.4454   | 1.54299 | 1.63026 | 0.00085  | 0.00384468  |
| 40.7207  | 118.61   | 1.5424  | 5.60224 | 5.00E-05 | 0.000323538 |
| 167.456  | 487.193  | 1.54072 | 5.13947 | 5.00E-05 | 0.000323538 |
| 1.65339  | 4.80721  | 1.53978 | 2.44278 | 5.00E-05 | 0.000323538 |
| 0.414038 | 1.20295  | 1.53874 | 1.42765 | 0.0034   | 0.012418    |
| 2.76973  | 7.99381  | 1.52914 | 1.6728  | 0.0002   | 0.00110793  |
| 0.692876 | 1.99652  | 1.52682 | 1.09187 | 0.01385  | 0.0394511   |

|          |          |         |         |          |             |
|----------|----------|---------|---------|----------|-------------|
| 0.474644 | 1.36524  | 1.52423 | 1.965   | 0.0001   | 0.000602691 |
| 5.96947  | 17.159   | 1.52329 | 4.38983 | 5.00E-05 | 0.000323538 |
| 7.97835  | 22.9252  | 1.52277 | 5.55433 | 5.00E-05 | 0.000323538 |
| 6.01569  | 17.2711  | 1.52156 | 1.63599 | 0.00275  | 0.0103401   |
| 0.961349 | 2.75962  | 1.52134 | 1.85008 | 0.0001   | 0.000602691 |
| 0.26781  | 0.768653 | 1.52112 | 1.13574 | 0.01345  | 0.0384969   |
| 0.437743 | 1.25613  | 1.52083 | 1.8674  | 0.00105  | 0.00459538  |
| 0.391229 | 1.12175  | 1.51966 | 1.52734 | 0.0009   | 0.00404197  |
| 0.493639 | 1.41482  | 1.51909 | 2.06372 | 5.00E-05 | 0.000323538 |
| 3.75585  | 10.7545  | 1.51773 | 3.18001 | 5.00E-05 | 0.000323538 |
| 0.300539 | 0.860167 | 1.51706 | 1.95157 | 0.0002   | 0.00110793  |
| 0.357039 | 1.01985  | 1.5142  | 2.09578 | 0.0002   | 0.00110793  |
| 6.21471  | 17.7309  | 1.51251 | 3.48693 | 5.00E-05 | 0.000323538 |
| 0.83076  | 2.36722  | 1.51069 | 1.84319 | 5.00E-05 | 0.000323538 |
| 1.63135  | 4.64295  | 1.50898 | 3.04987 | 5.00E-05 | 0.000323538 |
| 142.922  | 406.156  | 1.5068  | 4.55437 | 5.00E-05 | 0.000323538 |
| 1.8345   | 5.20564  | 1.50469 | 1.45644 | 0.0024   | 0.00925333  |
| 0.759089 | 2.15141  | 1.50294 | 1.42025 | 0.0038   | 0.0136322   |
| 28.7452  | 81.4419  | 1.50245 | 5.36928 | 5.00E-05 | 0.000323538 |
| 4.51202  | 12.781   | 1.50216 | 4.86336 | 5.00E-05 | 0.000323538 |
| 1.1674   | 3.30676  | 1.50211 | 2.11904 | 5.00E-05 | 0.000323538 |
| 19.3419  | 54.6513  | 1.49853 | 4.80778 | 5.00E-05 | 0.000323538 |
| 0.3452   | 0.97507  | 1.49807 | 2.01043 | 5.00E-05 | 0.000323538 |
| 3.14865  | 8.85817  | 1.49228 | 3.81973 | 5.00E-05 | 0.000323538 |
| 0.71643  | 2.01526  | 1.49207 | 1.09225 | 0.0141   | 0.0400514   |
| 32.2536  | 90.6405  | 1.49069 | 5.38137 | 5.00E-05 | 0.000323538 |
| 1.94794  | 5.47327  | 1.49045 | 2.24664 | 5.00E-05 | 0.000323538 |
| 0.415304 | 1.16267  | 1.4852  | 1.80675 | 0.00045  | 0.00223165  |
| 18.642   | 52.0955  | 1.48261 | 4.66076 | 5.00E-05 | 0.000323538 |
| 0.676375 | 1.88658  | 1.47988 | 2.36649 | 5.00E-05 | 0.000323538 |
| 2.26964  | 6.32908  | 1.47953 | 3.58181 | 5.00E-05 | 0.000323538 |
| 0.83942  | 2.33891  | 1.47837 | 2.22439 | 5.00E-05 | 0.000323538 |
| 8.58476  | 23.9024  | 1.47731 | 5.10312 | 5.00E-05 | 0.000323538 |
| 53.526   | 148.986  | 1.47686 | 5.35163 | 5.00E-05 | 0.000323538 |
| 2.6643   | 7.41085  | 1.47588 | 1.28328 | 0.0068   | 0.0221606   |
| 1.4015   | 3.89579  | 1.47495 | 2.17837 | 5.00E-05 | 0.000323538 |
| 130.598  | 362.848  | 1.47423 | 3.00264 | 5.00E-05 | 0.000323538 |
| 76.9655  | 213.55   | 1.47229 | 5.84851 | 5.00E-05 | 0.000323538 |
| 1.57723  | 4.37055  | 1.47042 | 3.07232 | 5.00E-05 | 0.000323538 |
| 8.97695  | 24.8609  | 1.46958 | 5.31619 | 5.00E-05 | 0.000323538 |
| 330.81   | 914.543  | 1.46705 | 3.61218 | 5.00E-05 | 0.000323538 |



|          |          |         |         |          |             |
|----------|----------|---------|---------|----------|-------------|
| 4.40301  | 12.144   | 1.46369 | 4.15434 | 5.00E-05 | 0.000323538 |
| 6.27986  | 17.3137  | 1.46311 | 3.67662 | 5.00E-05 | 0.000323538 |
| 5.29845  | 14.6057  | 1.46289 | 4.38493 | 5.00E-05 | 0.000323538 |
| 2.61251  | 7.18279  | 1.45911 | 3.14086 | 5.00E-05 | 0.000323538 |
| 4.09614  | 11.2609  | 1.45898 | 4.25036 | 5.00E-05 | 0.000323538 |
| 115.489  | 316.187  | 1.45302 | 5.43306 | 5.00E-05 | 0.000323538 |
| 5.89473  | 16.1345  | 1.45266 | 4.29522 | 5.00E-05 | 0.000323538 |
| 5.1013   | 13.9359  | 1.44987 | 4.39171 | 5.00E-05 | 0.000323538 |
| 2.43273  | 6.6251   | 1.44536 | 2.47448 | 5.00E-05 | 0.000323538 |
| 3.12916  | 8.52118  | 1.44528 | 1.25556 | 0.0109   | 0.0324579   |
| 6.68511  | 18.1823  | 1.44351 | 3.57341 | 5.00E-05 | 0.000323538 |
| 20.5431  | 55.8597  | 1.44315 | 5.21198 | 5.00E-05 | 0.000323538 |
| 4.69537  | 12.756   | 1.44187 | 3.3441  | 5.00E-05 | 0.000323538 |
| 1.61851  | 4.39676  | 1.44177 | 3.44024 | 5.00E-05 | 0.000323538 |
| 2.68933  | 7.2972   | 1.4401  | 5.36637 | 5.00E-05 | 0.000323538 |
| 0.420292 | 1.13966  | 1.43914 | 1.38954 | 0.0016   | 0.00653959  |
| 0.412209 | 1.11722  | 1.43847 | 1.14005 | 0.01325  | 0.0379895   |
| 7.78876  | 21.0801  | 1.43642 | 4.2594  | 5.00E-05 | 0.000323538 |
| 1.41156  | 3.81845  | 1.43569 | 1.52436 | 0.00095  | 0.00421906  |
| 11.9214  | 32.2439  | 1.43547 | 3.48404 | 5.00E-05 | 0.000323538 |
| 23.8603  | 64.3912  | 1.43225 | 4.18617 | 5.00E-05 | 0.000323538 |
| 0.986447 | 2.65791  | 1.42998 | 1.51303 | 0.00255  | 0.00970734  |
| 1.42918  | 3.84252  | 1.42686 | 2.06023 | 0.0001   | 0.000602691 |
| 4.20705  | 11.3016  | 1.42564 | 2.0624  | 5.00E-05 | 0.000323538 |
| 10.9735  | 29.4477  | 1.42413 | 4.17482 | 5.00E-05 | 0.000323538 |
| 3.14819  | 8.44372  | 1.42336 | 2.02062 | 0.0007   | 0.00324944  |
| 2.30531  | 6.18293  | 1.42333 | 2.53892 | 5.00E-05 | 0.000323538 |
| 54.4347  | 145.933  | 1.4227  | 5.21524 | 5.00E-05 | 0.000323538 |
| 1.15939  | 3.10656  | 1.42196 | 2.06041 | 5.00E-05 | 0.000323538 |
| 0.883835 | 2.36788  | 1.42175 | 2.07599 | 5.00E-05 | 0.000323538 |
| 57.0121  | 152.516  | 1.41962 | 5.20826 | 5.00E-05 | 0.000323538 |
| 0.584672 | 1.55769  | 1.41371 | 1.36275 | 0.00585  | 0.0195078   |
| 2.99025  | 7.94578  | 1.40992 | 3.76517 | 5.00E-05 | 0.000323538 |
| 20.3248  | 53.9451  | 1.40825 | 4.30617 | 5.00E-05 | 0.000323538 |
| 0.341781 | 0.906468 | 1.40718 | 1.58117 | 0.0005   | 0.00244658  |
| 3.5087   | 9.29534  | 1.40557 | 2.29938 | 5.00E-05 | 0.000323538 |
| 0.583477 | 1.54162  | 1.4017  | 1.96882 | 5.00E-05 | 0.000323538 |
| 0.646122 | 1.70577  | 1.40055 | 1.66402 | 0.00025  | 0.00134358  |
| 1.96572  | 5.1875   | 1.39998 | 2.84411 | 5.00E-05 | 0.000323538 |
| 6.80899  | 17.9614  | 1.39939 | 5.43669 | 5.00E-05 | 0.000323538 |
| 6.72954  | 17.7482  | 1.39909 | 4.32935 | 5.00E-05 | 0.000323538 |

|          |          |         |         |          |             |
|----------|----------|---------|---------|----------|-------------|
| 48.176   | 126.854  | 1.39678 | 5.01879 | 5.00E-05 | 0.000323538 |
| 45.4975  | 119.79   | 1.39665 | 4.30485 | 5.00E-05 | 0.000323538 |
| 20.1     | 52.8561  | 1.39488 | 4.96193 | 5.00E-05 | 0.000323538 |
| 3.90322  | 10.2574  | 1.39392 | 1.5664  | 0.00265  | 0.0100319   |
| 30.4481  | 79.9287  | 1.39236 | 4.84203 | 5.00E-05 | 0.000323538 |
| 6.55437  | 17.2052  | 1.39232 | 4.05421 | 5.00E-05 | 0.000323538 |
| 2.62111  | 6.88032  | 1.3923  | 2.7319  | 5.00E-05 | 0.000323538 |
| 1.47378  | 3.86213  | 1.38988 | 2.62126 | 5.00E-05 | 0.000323538 |
| 9.92257  | 25.9983  | 1.38963 | 2.95151 | 5.00E-05 | 0.000323538 |
| 3.38971  | 8.87906  | 1.38924 | 3.49428 | 5.00E-05 | 0.000323538 |
| 6.2711   | 16.4227  | 1.3889  | 2.94536 | 5.00E-05 | 0.000323538 |
| 2.85974  | 7.4886   | 1.38881 | 3.20316 | 5.00E-05 | 0.000323538 |
| 249.93   | 652.835  | 1.38519 | 4.44849 | 5.00E-05 | 0.000323538 |
| 0.9325   | 2.43048  | 1.38207 | 2.27148 | 5.00E-05 | 0.000323538 |
| 0.462988 | 1.20657  | 1.38186 | 1.43133 | 0.0021   | 0.00824731  |
| 422.486  | 1100.97  | 1.38181 | 4.52285 | 5.00E-05 | 0.000323538 |
| 4.93161  | 12.8446  | 1.38103 | 1.84272 | 0.00065  | 0.00304972  |
| 6.708    | 17.4512  | 1.37937 | 1.97936 | 5.00E-05 | 0.000323538 |
| 2.74059  | 7.12929  | 1.37927 | 1.38167 | 0.00235  | 0.00908152  |
| 0.427557 | 1.11047  | 1.37698 | 1.40706 | 0.0027   | 0.0101896   |
| 0.644458 | 1.67304  | 1.37631 | 2.43491 | 5.00E-05 | 0.000323538 |
| 8.02272  | 20.775   | 1.37268 | 4.55616 | 5.00E-05 | 0.000323538 |
| 0.433917 | 1.11887  | 1.36655 | 1.75635 | 0.0001   | 0.000602691 |
| 52.3653  | 135.012  | 1.3664  | 4.55815 | 5.00E-05 | 0.000323538 |
| 2.72308  | 7.01466  | 1.36514 | 2.51981 | 5.00E-05 | 0.000323538 |
| 1.15451  | 2.96714  | 1.36179 | 3.18503 | 5.00E-05 | 0.000323538 |
| 3.02678  | 7.77817  | 1.36165 | 2.34144 | 5.00E-05 | 0.000323538 |
| 2.64049  | 6.77552  | 1.35953 | 3.37474 | 5.00E-05 | 0.000323538 |
| 72.2566  | 185.223  | 1.35806 | 5.09835 | 5.00E-05 | 0.000323538 |
| 0.592032 | 1.51546  | 1.356   | 1.85167 | 0.0001   | 0.000602691 |
| 3.80247  | 9.73297  | 1.35594 | 3.49226 | 5.00E-05 | 0.000323538 |
| 9.93234  | 25.3967  | 1.35444 | 3.41423 | 5.00E-05 | 0.000323538 |
| 27.852   | 71.1589  | 1.35326 | 6.17234 | 5.00E-05 | 0.000323538 |
| 1.36048  | 3.47498  | 1.35289 | 2.29366 | 5.00E-05 | 0.000323538 |
| 1.21946  | 3.11306  | 1.35209 | 1.96188 | 5.00E-05 | 0.000323538 |
| 0.397891 | 1.01417  | 1.34985 | 1.14071 | 0.00955  | 0.029171    |
| 0.278032 | 0.708631 | 1.34978 | 1.0835  | 0.0107   | 0.0319764   |
| 0.560176 | 1.42741  | 1.34944 | 1.25141 | 0.00975  | 0.0296194   |
| 1.46438  | 3.72278  | 1.3461  | 2.78153 | 5.00E-05 | 0.000323538 |
| 1.2435   | 3.15917  | 1.34513 | 3.62711 | 5.00E-05 | 0.000323538 |
| 32.2264  | 81.8344  | 1.34446 | 4.36739 | 5.00E-05 | 0.000323538 |

|          |         |         |         |          |             |
|----------|---------|---------|---------|----------|-------------|
| 1.04526  | 2.65287 | 1.34369 | 1.55377 | 0.0048   | 0.0165255   |
| 2.03021  | 5.15032 | 1.34303 | 2.17132 | 5.00E-05 | 0.000323538 |
| 33.6801  | 85.2621 | 1.34001 | 4.9074  | 5.00E-05 | 0.000323538 |
| 1.00805  | 2.54489 | 1.33604 | 1.61078 | 0.00075  | 0.00344842  |
| 0.838738 | 2.11272 | 1.33281 | 2.86389 | 5.00E-05 | 0.000323538 |
| 1.32252  | 3.32834 | 1.33151 | 2.37989 | 5.00E-05 | 0.000323538 |
| 2.0138   | 5.06587 | 1.33089 | 2.96533 | 5.00E-05 | 0.000323538 |
| 2.06302  | 5.18514 | 1.32962 | 3.97906 | 5.00E-05 | 0.000323538 |
| 9.62558  | 24.1835 | 1.32907 | 3.90086 | 5.00E-05 | 0.000323538 |
| 5.1861   | 13.0259 | 1.32866 | 3.72776 | 5.00E-05 | 0.000323538 |
| 10.6166  | 26.6474 | 1.32767 | 4.68315 | 5.00E-05 | 0.000323538 |
| 4.90908  | 12.3216 | 1.32766 | 4.59491 | 5.00E-05 | 0.000323538 |
| 33.2335  | 83.4031 | 1.32746 | 4.78841 | 5.00E-05 | 0.000323538 |
| 1.64252  | 4.11929 | 1.32649 | 2.53042 | 5.00E-05 | 0.000323538 |
| 3.63562  | 9.11625 | 1.32624 | 3.38853 | 5.00E-05 | 0.000323538 |
| 6.04287  | 15.1498 | 1.32599 | 4.30519 | 5.00E-05 | 0.000323538 |
| 2.016    | 5.05271 | 1.32556 | 3.01762 | 5.00E-05 | 0.000323538 |
| 5.11046  | 12.7935 | 1.32388 | 4.12818 | 5.00E-05 | 0.000323538 |
| 0.741772 | 1.85619 | 1.3233  | 1.5529  | 0.0004   | 0.00202805  |
| 5.03549  | 12.5807 | 1.32101 | 2.32869 | 5.00E-05 | 0.000323538 |
| 14.2182  | 35.5132 | 1.32062 | 4.3279  | 5.00E-05 | 0.000323538 |
| 0.840846 | 2.09777 | 1.31894 | 1.63621 | 0.0005   | 0.00244658  |
| 1.04365  | 2.60348 | 1.3188  | 2.10489 | 5.00E-05 | 0.000323538 |
| 0.413734 | 1.03209 | 1.31879 | 1.40538 | 0.0042   | 0.0148296   |
| 0.65625  | 1.63539 | 1.31732 | 1.34866 | 0.00315  | 0.0116462   |
| 3.48977  | 8.68658 | 1.31566 | 4.42594 | 5.00E-05 | 0.000323538 |
| 32.1978  | 80.0462 | 1.31387 | 4.34393 | 5.00E-05 | 0.000323538 |
| 4.65998  | 11.576  | 1.31274 | 4.17578 | 5.00E-05 | 0.000323538 |
| 1.87666  | 4.6563  | 1.31102 | 2.41454 | 5.00E-05 | 0.000323538 |
| 0.551547 | 1.36837 | 1.3109  | 2.03728 | 0.00035  | 0.00180697  |
| 4.90831  | 12.1745 | 1.31057 | 3.2074  | 5.00E-05 | 0.000323538 |
| 2.50389  | 6.20175 | 1.3085  | 1.51606 | 0.0016   | 0.00653959  |
| 0.795658 | 1.96968 | 1.30774 | 1.37598 | 0.0064   | 0.0210325   |
| 10.8454  | 26.8252 | 1.30651 | 3.88116 | 5.00E-05 | 0.000323538 |
| 0.988532 | 2.44415 | 1.30597 | 2.19212 | 5.00E-05 | 0.000323538 |
| 1.11575  | 2.7573  | 1.30524 | 1.6078  | 0.0011   | 0.004771    |
| 26.1567  | 64.6369 | 1.30518 | 5.16808 | 5.00E-05 | 0.000323538 |
| 65.655   | 161.578 | 1.29925 | 4.26429 | 5.00E-05 | 0.000323538 |
| 189.256  | 465.424 | 1.2982  | 4.73434 | 5.00E-05 | 0.000323538 |
| 5.72853  | 14.078  | 1.2972  | 2.39279 | 5.00E-05 | 0.000323538 |
| 4.28003  | 10.511  | 1.29621 | 1.74962 | 0.00025  | 0.00134358  |

|          |          |         |         |          |             |
|----------|----------|---------|---------|----------|-------------|
| 1.22711  | 3.01315  | 1.29601 | 3.60612 | 5.00E-05 | 0.000323538 |
| 2.31607  | 5.67624  | 1.29326 | 2.81832 | 5.00E-05 | 0.000323538 |
| 2.69711  | 6.60943  | 1.29311 | 2.96212 | 5.00E-05 | 0.000323538 |
| 11.8936  | 29.14    | 1.29282 | 3.56272 | 5.00E-05 | 0.000323538 |
| 0.661015 | 1.61733  | 1.29086 | 1.70135 | 0.00015  | 0.000860006 |
| 4.55389  | 11.1218  | 1.28822 | 4.03224 | 5.00E-05 | 0.000323538 |
| 3.7445   | 9.13733  | 1.287   | 3.20115 | 5.00E-05 | 0.000323538 |
| 0.611921 | 1.49303  | 1.28682 | 1.12999 | 0.01155  | 0.034002    |
| 0.984694 | 2.40235  | 1.2867  | 1.6523  | 0.0005   | 0.00244658  |
| 1.35115  | 3.2952   | 1.28618 | 1.44948 | 0.00375  | 0.0134897   |
| 2.24959  | 5.48444  | 1.28568 | 2.8317  | 5.00E-05 | 0.000323538 |
| 104.268  | 254.069  | 1.28492 | 4.89175 | 5.00E-05 | 0.000323538 |
| 3.37037  | 8.20199  | 1.28307 | 3.85633 | 5.00E-05 | 0.000323538 |
| 11.4226  | 27.7668  | 1.28147 | 5.25136 | 5.00E-05 | 0.000323538 |
| 26.7468  | 65.0146  | 1.2814  | 3.69265 | 5.00E-05 | 0.000323538 |
| 4.00499  | 9.71717  | 1.27874 | 3.80436 | 5.00E-05 | 0.000323538 |
| 2.49882  | 6.05477  | 1.27682 | 3.87642 | 5.00E-05 | 0.000323538 |
| 1.0366   | 2.51135  | 1.27661 | 2.2431  | 5.00E-05 | 0.000323538 |
| 1.28394  | 3.10821  | 1.27551 | 2.18729 | 5.00E-05 | 0.000323538 |
| 0.427218 | 1.03343  | 1.27439 | 1.76395 | 0.0011   | 0.004771    |
| 2.55467  | 6.17926  | 1.2743  | 2.21852 | 5.00E-05 | 0.000323538 |
| 4.0456   | 9.78331  | 1.27397 | 2.72239 | 5.00E-05 | 0.000323538 |
| 2.73907  | 6.61837  | 1.27279 | 2.19081 | 5.00E-05 | 0.000323538 |
| 8.50128  | 20.5314  | 1.27208 | 2.24493 | 5.00E-05 | 0.000323538 |
| 2.60063  | 6.2804   | 1.272   | 3.75772 | 5.00E-05 | 0.000323538 |
| 0.347287 | 0.838368 | 1.27145 | 1.58944 | 0.0008   | 0.00364455  |
| 1.01705  | 2.45323  | 1.27029 | 1.82049 | 5.00E-05 | 0.000323538 |
| 1.16449  | 2.80468  | 1.26813 | 1.19208 | 0.00915  | 0.02816     |
| 0.704085 | 1.69529  | 1.26771 | 1.39975 | 0.0106   | 0.031724    |
| 6.38619  | 15.3694  | 1.26703 | 3.77785 | 5.00E-05 | 0.000323538 |
| 7.32869  | 17.6141  | 1.2651  | 3.96568 | 5.00E-05 | 0.000323538 |
| 18.0262  | 43.3148  | 1.26476 | 4.14094 | 5.00E-05 | 0.000323538 |
| 40.9227  | 98.1857  | 1.26261 | 3.43375 | 5.00E-05 | 0.000323538 |
| 8.16523  | 19.5844  | 1.26214 | 3.84029 | 5.00E-05 | 0.000323538 |
| 7.22594  | 17.3153  | 1.26079 | 2.13948 | 5.00E-05 | 0.000323538 |
| 10.9123  | 26.1378  | 1.26019 | 3.08878 | 5.00E-05 | 0.000323538 |
| 5.00002  | 11.9719  | 1.25965 | 1.98718 | 5.00E-05 | 0.000323538 |
| 3.88055  | 9.29008  | 1.25943 | 3.18964 | 5.00E-05 | 0.000323538 |
| 2.24405  | 5.36893  | 1.25853 | 3.75857 | 5.00E-05 | 0.000323538 |
| 0.447863 | 1.07084  | 1.25761 | 1.83122 | 0.0001   | 0.000602691 |
| 4.7772   | 11.4198  | 1.2573  | 2.87922 | 5.00E-05 | 0.000323538 |

|          |          |         |         |          |             |
|----------|----------|---------|---------|----------|-------------|
| 5.36579  | 12.8213  | 1.25668 | 3.55438 | 5.00E-05 | 0.000323538 |
| 782.011  | 1867.53  | 1.25587 | 3.87701 | 5.00E-05 | 0.000323538 |
| 40.1391  | 95.41    | 1.24913 | 4.14744 | 5.00E-05 | 0.000323538 |
| 5.80623  | 13.7906  | 1.24801 | 1.24555 | 0.00555  | 0.0187078   |
| 6.28266  | 14.9143  | 1.24725 | 4.16825 | 5.00E-05 | 0.000323538 |
| 1.79577  | 4.26194  | 1.24691 | 1.60812 | 0.0007   | 0.00324944  |
| 0.649563 | 1.54157  | 1.24686 | 1.70139 | 0.0006   | 0.00285599  |
| 11.7448  | 27.8598  | 1.24616 | 3.03877 | 5.00E-05 | 0.000323538 |
| 19.6664  | 46.6264  | 1.24541 | 4.46568 | 5.00E-05 | 0.000323538 |
| 15.2114  | 36.0356  | 1.24427 | 3.33683 | 5.00E-05 | 0.000323538 |
| 6.12459  | 14.5066  | 1.24403 | 3.75576 | 5.00E-05 | 0.000323538 |
| 38.9954  | 92.2868  | 1.24282 | 3.9186  | 5.00E-05 | 0.000323538 |
| 8.80257  | 20.825   | 1.24232 | 5.36044 | 5.00E-05 | 0.000323538 |
| 1.18921  | 2.8113   | 1.24124 | 3.17585 | 5.00E-05 | 0.000323538 |
| 1.77942  | 4.20172  | 1.23958 | 1.9311  | 5.00E-05 | 0.000323538 |
| 0.869881 | 2.05147  | 1.23777 | 2.12072 | 5.00E-05 | 0.000323538 |
| 5.8041   | 13.6865  | 1.23761 | 1.34332 | 0.0143   | 0.0404693   |
| 8.82131  | 20.7861  | 1.23655 | 1.85531 | 0.0121   | 0.0352929   |
| 0.427574 | 1.0075   | 1.23654 | 1.42996 | 0.00075  | 0.00344842  |
| 15.7761  | 37.1586  | 1.23595 | 4.84025 | 5.00E-05 | 0.000323538 |
| 1.84414  | 4.34251  | 1.23558 | 2.71699 | 5.00E-05 | 0.000323538 |
| 0.42843  | 1.00881  | 1.23552 | 1.15392 | 0.01315  | 0.0377618   |
| 1.64549  | 3.87109  | 1.23423 | 1.51319 | 5.00E-05 | 0.000323538 |
| 2.02737  | 4.76844  | 1.23391 | 1.96129 | 5.00E-05 | 0.000323538 |
| 1.54478  | 3.6333   | 1.23388 | 1.40837 | 0.00205  | 0.00809422  |
| 16.2927  | 38.2915  | 1.2328  | 3.10997 | 5.00E-05 | 0.000323538 |
| 0.329905 | 0.774255 | 1.23076 | 1.31539 | 0.002    | 0.00792919  |
| 3.02614  | 7.09404  | 1.22913 | 3.0249  | 5.00E-05 | 0.000323538 |
| 4.70241  | 11.0133  | 1.22777 | 2.25879 | 5.00E-05 | 0.000323538 |
| 65.5288  | 153.302  | 1.22618 | 4.15097 | 5.00E-05 | 0.000323538 |
| 0.67007  | 1.56726  | 1.22586 | 1.22987 | 0.0147   | 0.0413464   |
| 17.0339  | 39.8205  | 1.2251  | 4.56908 | 5.00E-05 | 0.000323538 |
| 1.84322  | 4.30553  | 1.22396 | 2.72803 | 5.00E-05 | 0.000323538 |
| 24.4125  | 57.0102  | 1.2236  | 3.87195 | 5.00E-05 | 0.000323538 |
| 6.21663  | 14.5096  | 1.22281 | 4.44329 | 5.00E-05 | 0.000323538 |
| 124.783  | 291.096  | 1.22207 | 3.98249 | 5.00E-05 | 0.000323538 |
| 8.9976   | 20.9813  | 1.22149 | 4.27037 | 5.00E-05 | 0.000323538 |
| 0.651176 | 1.51707  | 1.22017 | 1.6333  | 0.0001   | 0.000602691 |
| 13.4621  | 31.3396  | 1.21909 | 2.2098  | 5.00E-05 | 0.000323538 |
| 6.13671  | 14.2738  | 1.21783 | 3.88503 | 5.00E-05 | 0.000323538 |
| 43.6929  | 101.624  | 1.21778 | 3.81804 | 5.00E-05 | 0.000323538 |

|          |          |         |         |          |             |
|----------|----------|---------|---------|----------|-------------|
| 5.40307  | 12.5527  | 1.21614 | 4.17252 | 5.00E-05 | 0.000323538 |
| 2.89435  | 6.72397  | 1.21607 | 2.08807 | 5.00E-05 | 0.000323538 |
| 5.67624  | 13.1817  | 1.21553 | 3.54061 | 5.00E-05 | 0.000323538 |
| 1.0988   | 2.55149  | 1.21541 | 2.2937  | 5.00E-05 | 0.000323538 |
| 0.356328 | 0.826495 | 1.2138  | 1.27403 | 0.00265  | 0.0100319   |
| 5.20789  | 12.0772  | 1.21352 | 2.63715 | 5.00E-05 | 0.000323538 |
| 5.80101  | 13.4526  | 1.21351 | 3.44396 | 5.00E-05 | 0.000323538 |
| 4.7936   | 11.1101  | 1.21269 | 2.59137 | 5.00E-05 | 0.000323538 |
| 0.752941 | 1.74506  | 1.21267 | 1.91996 | 0.0003   | 0.00157947  |
| 137.106  | 317.618  | 1.212   | 1.17588 | 0.0165   | 0.0453942   |
| 5.29358  | 12.2353  | 1.20873 | 3.33221 | 5.00E-05 | 0.000323538 |
| 1.47529  | 3.40909  | 1.20839 | 2.22943 | 5.00E-05 | 0.000323538 |
| 2.92912  | 6.76678  | 1.208   | 1.46196 | 0.00115  | 0.00495975  |
| 3.68755  | 8.51035  | 1.20656 | 5.09163 | 5.00E-05 | 0.000323538 |
| 1.37734  | 3.17789  | 1.20618 | 2.64668 | 5.00E-05 | 0.000323538 |
| 0.749946 | 1.7302   | 1.20608 | 1.81427 | 5.00E-05 | 0.000323538 |
| 6.20089  | 14.2999  | 1.20545 | 2.43841 | 5.00E-05 | 0.000323538 |
| 1.97947  | 4.56418  | 1.20524 | 3.03407 | 5.00E-05 | 0.000323538 |
| 5.79172  | 13.3419  | 1.2039  | 3.83069 | 5.00E-05 | 0.000323538 |
| 4.72959  | 10.8873  | 1.20286 | 3.28656 | 5.00E-05 | 0.000323538 |
| 0.620605 | 1.42836  | 1.20261 | 1.38253 | 0.00225  | 0.00875217  |
| 0.745237 | 1.71417  | 1.20173 | 1.99381 | 5.00E-05 | 0.000323538 |
| 0.877605 | 2.01814  | 1.20138 | 1.48662 | 0.00105  | 0.00459538  |
| 0.556399 | 1.27943  | 1.20131 | 1.44541 | 0.00165  | 0.00672003  |
| 5.9788   | 13.7438  | 1.20085 | 3.59596 | 5.00E-05 | 0.000323538 |
| 60.4985  | 139.057  | 1.20071 | 3.69726 | 5.00E-05 | 0.000323538 |
| 3.69919  | 8.50168  | 1.20054 | 3.78848 | 5.00E-05 | 0.000323538 |
| 248.119  | 570.089  | 1.20016 | 3.88259 | 5.00E-05 | 0.000323538 |
| 11.1418  | 25.5967  | 1.19997 | 3.66657 | 5.00E-05 | 0.000323538 |
| 29.6743  | 68.1303  | 1.19908 | 1.24028 | 0.0074   | 0.0237286   |
| 0.831781 | 1.90791  | 1.19772 | 2.10604 | 5.00E-05 | 0.000323538 |
| 0.403953 | 0.926485 | 1.19758 | 1.39388 | 0.00125  | 0.00531489  |
| 4.21825  | 9.67024  | 1.19691 | 3.45281 | 5.00E-05 | 0.000323538 |
| 5.22035  | 11.9454  | 1.19424 | 4.42301 | 5.00E-05 | 0.000323538 |
| 2.45254  | 5.60874  | 1.1934  | 1.98746 | 5.00E-05 | 0.000323538 |
| 13.5775  | 31.0354  | 1.1927  | 3.85766 | 5.00E-05 | 0.000323538 |
| 4.0579   | 9.27495  | 1.19261 | 3.23121 | 5.00E-05 | 0.000323538 |
| 1.40801  | 3.21573  | 1.19149 | 3.16336 | 5.00E-05 | 0.000323538 |
| 1.99291  | 4.54691  | 1.19001 | 2.22691 | 5.00E-05 | 0.000323538 |
| 25.4587  | 58.0811  | 1.18991 | 3.84492 | 5.00E-05 | 0.000323538 |
| 101.746  | 232.112  | 1.18985 | 4.26977 | 5.00E-05 | 0.000323538 |

|          |          |         |         |          |             |
|----------|----------|---------|---------|----------|-------------|
| 34.6318  | 78.9492  | 1.18883 | 4.66287 | 5.00E-05 | 0.000323538 |
| 33.271   | 75.7891  | 1.18772 | 3.79817 | 5.00E-05 | 0.000323538 |
| 17.5191  | 39.899   | 1.18742 | 3.8393  | 5.00E-05 | 0.000323538 |
| 0.384924 | 0.87561  | 1.18572 | 1.30007 | 0.00275  | 0.0103401   |
| 15.8421  | 36.0263  | 1.18528 | 3.74481 | 5.00E-05 | 0.000323538 |
| 1.36023  | 3.0925   | 1.18493 | 1.53336 | 0.0014   | 0.00584309  |
| 15.7321  | 35.7388  | 1.18378 | 3.82218 | 5.00E-05 | 0.000323538 |
| 10.0855  | 22.8971  | 1.18288 | 4.15142 | 5.00E-05 | 0.000323538 |
| 2.5387   | 5.75769  | 1.1814  | 2.67958 | 5.00E-05 | 0.000323538 |
| 26.9626  | 61.087   | 1.1799  | 3.8157  | 5.00E-05 | 0.000323538 |
| 36.1994  | 81.8401  | 1.17684 | 4.2073  | 5.00E-05 | 0.000323538 |
| 12.5507  | 28.3515  | 1.17566 | 2.19366 | 5.00E-05 | 0.000323538 |
| 1.16337  | 2.62798  | 1.17564 | 2.7955  | 5.00E-05 | 0.000323538 |
| 11.2479  | 25.3577  | 1.17276 | 4.25196 | 5.00E-05 | 0.000323538 |
| 0.771622 | 1.73684  | 1.1705  | 1.20489 | 0.00795  | 0.0251583   |
| 118.283  | 265.908  | 1.16868 | 4.02969 | 5.00E-05 | 0.000323538 |
| 178      | 399.821  | 1.16748 | 4.0758  | 5.00E-05 | 0.000323538 |
| 6.26351  | 14.0612  | 1.16667 | 4.11944 | 5.00E-05 | 0.000323538 |
| 1.31264  | 2.94645  | 1.16651 | 1.7601  | 0.0001   | 0.000602691 |
| 212.762  | 477.351  | 1.16581 | 3.70849 | 5.00E-05 | 0.000323538 |
| 1.11282  | 2.49581  | 1.16529 | 2.11596 | 5.00E-05 | 0.000323538 |
| 0.337561 | 0.756809 | 1.16478 | 1.49336 | 0.0005   | 0.00244658  |
| 0.416066 | 0.932689 | 1.16458 | 1.19394 | 0.0067   | 0.021893    |
| 38.8814  | 87.1573  | 1.16454 | 4.31658 | 5.00E-05 | 0.000323538 |
| 1.9712   | 4.41043  | 1.16184 | 2.57673 | 5.00E-05 | 0.000323538 |
| 24.7598  | 55.3673  | 1.16103 | 4.36198 | 5.00E-05 | 0.000323538 |
| 20.415   | 45.6299  | 1.16035 | 3.68211 | 5.00E-05 | 0.000323538 |
| 32.1326  | 71.6855  | 1.15764 | 3.43202 | 5.00E-05 | 0.000323538 |
| 1.28499  | 2.86598  | 1.15727 | 1.46054 | 0.00045  | 0.00223165  |
| 0.422764 | 0.942289 | 1.15632 | 1.63311 | 0.0003   | 0.00157947  |
| 2.1321   | 4.75182  | 1.15621 | 1.87617 | 5.00E-05 | 0.000323538 |
| 0.495293 | 1.10281  | 1.15482 | 1.18613 | 0.00895  | 0.0276836   |
| 2.4547   | 5.46486  | 1.15464 | 3.26552 | 5.00E-05 | 0.000323538 |
| 7.37148  | 16.3987  | 1.15355 | 3.5481  | 5.00E-05 | 0.000323538 |
| 19.9441  | 44.3207  | 1.15202 | 2.96457 | 5.00E-05 | 0.000323538 |
| 2.90598  | 6.45706  | 1.15185 | 1.90474 | 5.00E-05 | 0.000323538 |
| 1.12677  | 2.50246  | 1.15115 | 1.53588 | 0.00035  | 0.00180697  |
| 1.09531  | 2.43166  | 1.15059 | 1.65081 | 0.00035  | 0.00180697  |
| 0.929864 | 2.0636   | 1.15007 | 1.6415  | 0.0001   | 0.000602691 |
| 0.44664  | 0.991152 | 1.15    | 1.51136 | 0.0006   | 0.00285599  |
| 2.44591  | 5.42737  | 1.14988 | 2.03823 | 0.0001   | 0.000602691 |

|          |         |         |         |          |             |
|----------|---------|---------|---------|----------|-------------|
| 0.494256 | 1.09628 | 1.14928 | 1.60162 | 0.00065  | 0.00304972  |
| 7.78153  | 17.2486 | 1.14835 | 3.72868 | 5.00E-05 | 0.000323538 |
| 5.89506  | 13.0548 | 1.147   | 4.49227 | 5.00E-05 | 0.000323538 |
| 3.26814  | 7.2314  | 1.1458  | 3.7674  | 5.00E-05 | 0.000323538 |
| 0.919866 | 2.03529 | 1.14574 | 1.57779 | 0.00035  | 0.00180697  |
| 2.17709  | 4.81627 | 1.14552 | 2.91713 | 5.00E-05 | 0.000323538 |
| 59.1648  | 130.884 | 1.14548 | 4.50678 | 5.00E-05 | 0.000323538 |
| 12.6898  | 28.0721 | 1.14547 | 4.40822 | 5.00E-05 | 0.000323538 |
| 3.46876  | 7.66418 | 1.14371 | 2.21809 | 5.00E-05 | 0.000323538 |
| 1.95429  | 4.31415 | 1.14243 | 2.37142 | 5.00E-05 | 0.000323538 |
| 25.8551  | 57.0656 | 1.14217 | 4.01049 | 5.00E-05 | 0.000323538 |
| 0.706039 | 1.55749 | 1.14141 | 1.67114 | 0.0003   | 0.00157947  |
| 0.535393 | 1.18049 | 1.14071 | 1.16089 | 0.0122   | 0.0355395   |
| 3.66176  | 8.07366 | 1.14069 | 3.38399 | 5.00E-05 | 0.000323538 |
| 8.86912  | 19.5435 | 1.13982 | 3.29527 | 5.00E-05 | 0.000323538 |
| 0.898064 | 1.97841 | 1.13945 | 1.46567 | 0.0026   | 0.009867    |
| 1.47068  | 3.23892 | 1.13903 | 2.91783 | 5.00E-05 | 0.000323538 |
| 0.973416 | 2.14133 | 1.13738 | 2.29679 | 5.00E-05 | 0.000323538 |
| 55.2498  | 121.486 | 1.13675 | 3.15231 | 5.00E-05 | 0.000323538 |
| 4.99685  | 10.9834 | 1.13623 | 3.40419 | 5.00E-05 | 0.000323538 |
| 1.14229  | 2.50868 | 1.135   | 1.56731 | 0.00055  | 0.00265935  |
| 2.32958  | 5.11405 | 1.1344  | 2.90165 | 5.00E-05 | 0.000323538 |
| 1.91142  | 4.19576 | 1.13429 | 1.72755 | 0.00035  | 0.00180697  |
| 12.2002  | 26.7792 | 1.1342  | 2.86991 | 5.00E-05 | 0.000323538 |
| 1.40571  | 3.08493 | 1.13394 | 2.08533 | 5.00E-05 | 0.000323538 |
| 3.94315  | 8.64904 | 1.13319 | 3.87304 | 5.00E-05 | 0.000323538 |
| 9.61103  | 21.0714 | 1.13253 | 3.33919 | 5.00E-05 | 0.000323538 |
| 4.66875  | 10.2333 | 1.13216 | 3.97184 | 5.00E-05 | 0.000323538 |
| 8.94503  | 19.6053 | 1.13208 | 2.21519 | 5.00E-05 | 0.000323538 |
| 2.60935  | 5.7131  | 1.13058 | 2.31599 | 5.00E-05 | 0.000323538 |
| 3.03654  | 6.64692 | 1.13025 | 2.69987 | 5.00E-05 | 0.000323538 |
| 31.696   | 69.3764 | 1.13015 | 3.41835 | 5.00E-05 | 0.000323538 |
| 14.1268  | 30.8806 | 1.12827 | 4.72603 | 5.00E-05 | 0.000323538 |
| 9.05324  | 19.7831 | 1.12776 | 3.33075 | 5.00E-05 | 0.000323538 |
| 108.438  | 236.938 | 1.12764 | 4.1201  | 5.00E-05 | 0.000323538 |
| 5.66723  | 12.3824 | 1.12758 | 2.72542 | 5.00E-05 | 0.000323538 |
| 34.9626  | 76.3461 | 1.12674 | 3.6728  | 5.00E-05 | 0.000323538 |
| 12.3658  | 27      | 1.12661 | 1.36252 | 0.00415  | 0.0146756   |
| 2.66512  | 5.81587 | 1.1258  | 2.6664  | 5.00E-05 | 0.000323538 |
| 8.23707  | 17.9682 | 1.12524 | 3.13745 | 5.00E-05 | 0.000323538 |
| 2.02753  | 4.42125 | 1.12473 | 1.88163 | 5.00E-05 | 0.000323538 |



|          |          |         |          |          |             |
|----------|----------|---------|----------|----------|-------------|
| 10.5145  | 22.9091  | 1.12354 | 3.2025   | 5.00E-05 | 0.000323538 |
| 0.617787 | 1.34597  | 1.12346 | 1.07087  | 0.0164   | 0.0451867   |
| 30.8308  | 67.1545  | 1.12311 | 4.11852  | 5.00E-05 | 0.000323538 |
| 3.02338  | 6.57745  | 1.12137 | 3.13636  | 5.00E-05 | 0.000323538 |
| 8.72897  | 18.985   | 1.12098 | 3.40311  | 5.00E-05 | 0.000323538 |
| 6.64721  | 14.4467  | 1.11991 | 3.47689  | 5.00E-05 | 0.000323538 |
| 5.50103  | 11.9413  | 1.11818 | 2.49244  | 5.00E-05 | 0.000323538 |
| 0.455971 | 0.988735 | 1.11664 | 2.18951  | 5.00E-05 | 0.000323538 |
| 3.68017  | 7.97775  | 1.11621 | 2.32555  | 5.00E-05 | 0.000323538 |
| 6.49741  | 14.0713  | 1.11482 | 2.02628  | 5.00E-05 | 0.000323538 |
| 3.36633  | 7.28428  | 1.11361 | 3.07085  | 5.00E-05 | 0.000323538 |
| 0.939001 | 2.03115  | 1.1131  | 1.79282  | 0.0001   | 0.000602691 |
| 7.32153  | 15.835   | 1.1129  | 2.32423  | 5.00E-05 | 0.000323538 |
| 12.0235  | 26.0034  | 1.11285 | 4.16941  | 5.00E-05 | 0.000323538 |
| 21.8844  | 47.3121  | 1.1123  | 3.99051  | 5.00E-05 | 0.000323538 |
| 3.45305  | 7.46003  | 1.11131 | 2.1982   | 5.00E-05 | 0.000323538 |
| 43.7945  | 94.5485  | 1.11031 | 4.18759  | 5.00E-05 | 0.000323538 |
| 2.65711  | 5.73294  | 1.10942 | 0.986738 | 0.0169   | 0.046259    |
| 4.17231  | 8.99969  | 1.10903 | 1.80546  | 0.0001   | 0.000602691 |
| 3.06532  | 6.61193  | 1.10903 | 2.51097  | 5.00E-05 | 0.000323538 |
| 5.42181  | 11.6875  | 1.10812 | 3.69397  | 5.00E-05 | 0.000323538 |
| 0.684642 | 1.47585  | 1.10812 | 1.32497  | 0.0057   | 0.0191047   |
| 62.6417  | 134.91   | 1.1068  | 3.70731  | 5.00E-05 | 0.000323538 |
| 5.06528  | 10.9074  | 1.10659 | 1.36496  | 0.00335  | 0.0122695   |
| 3.31137  | 7.12814  | 1.1061  | 2.30269  | 5.00E-05 | 0.000323538 |
| 6.85522  | 14.7553  | 1.10596 | 3.67567  | 5.00E-05 | 0.000323538 |
| 1.9092   | 4.10894  | 1.10579 | 2.41315  | 5.00E-05 | 0.000323538 |
| 123.863  | 266.547  | 1.10565 | 3.87743  | 5.00E-05 | 0.000323538 |
| 3.21264  | 6.91227  | 1.1054  | 2.55854  | 5.00E-05 | 0.000323538 |
| 4.98308  | 10.7196  | 1.10514 | 4.14016  | 5.00E-05 | 0.000323538 |
| 45.0968  | 97.0024  | 1.105   | 4.48735  | 5.00E-05 | 0.000323538 |
| 1.80478  | 3.8816   | 1.10483 | 2.17922  | 5.00E-05 | 0.000323538 |
| 32.2587  | 69.3345  | 1.10389 | 3.32964  | 5.00E-05 | 0.000323538 |
| 31.5453  | 67.7928  | 1.10371 | 3.50599  | 5.00E-05 | 0.000323538 |
| 1.48619  | 3.19333  | 1.10344 | 2.07213  | 5.00E-05 | 0.000323538 |
| 9.43875  | 20.2504  | 1.10128 | 3.15686  | 5.00E-05 | 0.000323538 |
| 1.38779  | 2.97719  | 1.10116 | 1.56596  | 0.00085  | 0.00384468  |
| 10.5273  | 22.5831  | 1.1011  | 2.79357  | 5.00E-05 | 0.000323538 |
| 9.11273  | 19.5473  | 1.10102 | 3.60843  | 5.00E-05 | 0.000323538 |
| 5.01508  | 10.7515  | 1.1002  | 1.70811  | 0.00055  | 0.00265935  |
| 10.4071  | 22.2915  | 1.09893 | 3.01622  | 5.00E-05 | 0.000323538 |

|          |          |         |         |          |             |
|----------|----------|---------|---------|----------|-------------|
| 1.24157  | 2.65828  | 1.09833 | 1.72335 | 5.00E-05 | 0.000323538 |
| 0.642507 | 1.37496  | 1.0976  | 2.235   | 5.00E-05 | 0.000323538 |
| 1.79154  | 3.83369  | 1.09753 | 1.48671 | 0.00255  | 0.00970734  |
| 0.437624 | 0.936307 | 1.09729 | 1.44108 | 0.0007   | 0.00324944  |
| 0.80936  | 1.73115  | 1.09688 | 1.47982 | 0.00165  | 0.00672003  |
| 0.771159 | 1.64921  | 1.09668 | 1.26578 | 0.0027   | 0.0101896   |
| 0.731822 | 1.56442  | 1.09607 | 1.13341 | 0.0112   | 0.0331523   |
| 0.85738  | 1.83259  | 1.09587 | 1.49717 | 0.0006   | 0.00285599  |
| 6.9544   | 14.8601  | 1.09545 | 1.85302 | 0.0001   | 0.000602691 |
| 9.61116  | 20.5354  | 1.09533 | 3.78572 | 5.00E-05 | 0.000323538 |
| 4.19727  | 8.96584  | 1.09499 | 2.68757 | 5.00E-05 | 0.000323538 |
| 7.46897  | 15.9422  | 1.09387 | 2.47463 | 5.00E-05 | 0.000323538 |
| 2.92932  | 6.24582  | 1.09232 | 3.02313 | 5.00E-05 | 0.000323538 |
| 11.3071  | 24.1043  | 1.09206 | 3.48366 | 5.00E-05 | 0.000323538 |
| 6.06271  | 12.9217  | 1.09177 | 2.9567  | 5.00E-05 | 0.000323538 |
| 3.92751  | 8.37065  | 1.09172 | 2.82873 | 5.00E-05 | 0.000323538 |
| 239.888  | 510.997  | 1.09096 | 2.93512 | 5.00E-05 | 0.000323538 |
| 1.88395  | 4.01304  | 1.09094 | 1.71118 | 5.00E-05 | 0.000323538 |
| 5.97837  | 12.7327  | 1.09071 | 2.96726 | 5.00E-05 | 0.000323538 |
| 3.39947  | 7.23884  | 1.09045 | 1.09356 | 0.014    | 0.0398228   |
| 32.9894  | 70.2067  | 1.08961 | 4.3458  | 5.00E-05 | 0.000323538 |
| 1.53452  | 3.26473  | 1.08917 | 1.20771 | 0.007    | 0.0226876   |
| 14.1873  | 30.1732  | 1.08867 | 3.84291 | 5.00E-05 | 0.000323538 |
| 76.783   | 163.188  | 1.08768 | 3.52585 | 5.00E-05 | 0.000323538 |
| 15.8973  | 33.7784  | 1.08732 | 3.75838 | 5.00E-05 | 0.000323538 |
| 11.6519  | 24.7574  | 1.0873  | 3.98946 | 5.00E-05 | 0.000323538 |
| 40.3812  | 85.7903  | 1.08713 | 3.50495 | 5.00E-05 | 0.000323538 |
| 67.9346  | 144.184  | 1.08569 | 3.61803 | 5.00E-05 | 0.000323538 |
| 1.99475  | 4.23363  | 1.08569 | 1.03799 | 0.01755  | 0.0477181   |
| 55.3508  | 117.467  | 1.08557 | 3.71458 | 5.00E-05 | 0.000323538 |
| 67.9298  | 144.151  | 1.08546 | 3.57051 | 5.00E-05 | 0.000323538 |
| 6.29999  | 13.3671  | 1.08527 | 1.97845 | 5.00E-05 | 0.000323538 |
| 1.97587  | 4.18919  | 1.08419 | 1.89897 | 5.00E-05 | 0.000323538 |
| 9.91749  | 21.0188  | 1.08363 | 3.44956 | 5.00E-05 | 0.000323538 |
| 3.36677  | 7.13498  | 1.08354 | 3.16693 | 5.00E-05 | 0.000323538 |
| 5.35366  | 11.3426  | 1.08316 | 3.37556 | 5.00E-05 | 0.000323538 |
| 0.791326 | 1.67582  | 1.08253 | 1.41874 | 0.00195  | 0.00775944  |
| 0.969853 | 2.05378  | 1.08244 | 1.98687 | 5.00E-05 | 0.000323538 |
| 13.5867  | 28.7627  | 1.082   | 3.84637 | 5.00E-05 | 0.000323538 |
| 2.61336  | 5.52974  | 1.08131 | 2.82583 | 5.00E-05 | 0.000323538 |
| 9.6265   | 20.3671  | 1.08115 | 3.99497 | 5.00E-05 | 0.000323538 |

|          |          |         |         |          |             |
|----------|----------|---------|---------|----------|-------------|
| 0.425474 | 0.899798 | 1.08053 | 1.22104 | 0.00765  | 0.0243897   |
| 6.92927  | 14.6522  | 1.08034 | 3.94921 | 5.00E-05 | 0.000323538 |
| 0.395981 | 0.836797 | 1.07945 | 1.13339 | 0.0114   | 0.0336359   |
| 2.29678  | 4.85214  | 1.07901 | 2.39593 | 5.00E-05 | 0.000323538 |
| 4.65037  | 9.82031  | 1.07842 | 3.72358 | 5.00E-05 | 0.000323538 |
| 0.771603 | 1.62932  | 1.07834 | 1.18244 | 0.00545  | 0.018435    |
| 8.76201  | 18.4952  | 1.07782 | 2.83165 | 5.00E-05 | 0.000323538 |
| 13.8425  | 29.2123  | 1.07747 | 3.86834 | 5.00E-05 | 0.000323538 |
| 0.371623 | 0.784083 | 1.07717 | 1.37763 | 0.0025   | 0.00955264  |
| 56.6679  | 119.532  | 1.07679 | 3.62283 | 5.00E-05 | 0.000323538 |
| 8.85833  | 18.6783  | 1.07626 | 2.95467 | 5.00E-05 | 0.000323538 |
| 2.64281  | 5.5712   | 1.07592 | 1.5791  | 0.00035  | 0.00180697  |
| 10.8886  | 22.9514  | 1.07576 | 4.59737 | 5.00E-05 | 0.000323538 |
| 3.30094  | 6.95597  | 1.07537 | 2.36439 | 5.00E-05 | 0.000323538 |
| 28.3591  | 59.7587  | 1.07534 | 1.37869 | 0.0025   | 0.00955264  |
| 84.7128  | 178.403  | 1.07449 | 3.85199 | 5.00E-05 | 0.000323538 |
| 24.1155  | 50.7605  | 1.07374 | 3.56312 | 5.00E-05 | 0.000323538 |
| 0.71796  | 1.51029  | 1.07285 | 1.04041 | 0.014    | 0.0398228   |
| 11.4386  | 24.0543  | 1.07239 | 2.39158 | 5.00E-05 | 0.000323538 |
| 5.53676  | 11.6412  | 1.07213 | 2.29212 | 5.00E-05 | 0.000323538 |
| 3.35504  | 7.05159  | 1.07162 | 1.94406 | 5.00E-05 | 0.000323538 |
| 113.108  | 237.585  | 1.07075 | 3.23097 | 5.00E-05 | 0.000323538 |
| 1.29741  | 2.7248   | 1.07052 | 2.17937 | 5.00E-05 | 0.000323538 |
| 1.31818  | 2.76832  | 1.07047 | 1.61954 | 0.00015  | 0.000860006 |
| 6.25998  | 13.1348  | 1.06916 | 3.55336 | 5.00E-05 | 0.000323538 |
| 1.1686   | 2.45042  | 1.06825 | 1.47488 | 0.00205  | 0.00809422  |
| 17.3431  | 36.3547  | 1.06778 | 3.53525 | 5.00E-05 | 0.000323538 |
| 2.65797  | 5.56798  | 1.06683 | 1.50312 | 0.00075  | 0.00344842  |
| 53.018   | 111.057  | 1.06675 | 3.53881 | 5.00E-05 | 0.000323538 |
| 0.625277 | 1.30942  | 1.06636 | 1.32361 | 0.00605  | 0.0200509   |
| 70.9736  | 148.612  | 1.06619 | 2.98015 | 5.00E-05 | 0.000323538 |
| 170.876  | 357.665  | 1.06566 | 3.60039 | 5.00E-05 | 0.000323538 |
| 5.57475  | 11.6686  | 1.06566 | 3.16444 | 5.00E-05 | 0.000323538 |
| 1.17147  | 2.45174  | 1.06549 | 2.35264 | 5.00E-05 | 0.000323538 |
| 24.096   | 50.4294  | 1.06547 | 3.84998 | 5.00E-05 | 0.000323538 |
| 49.6917  | 103.992  | 1.06539 | 3.42185 | 5.00E-05 | 0.000323538 |
| 50.1072  | 104.818  | 1.06479 | 3.67972 | 5.00E-05 | 0.000323538 |
| 2.03141  | 4.24899  | 1.06464 | 1.12548 | 0.0098   | 0.0297368   |
| 0.640952 | 1.33952  | 1.06343 | 1.17675 | 0.0072   | 0.023217    |
| 0.503448 | 1.05192  | 1.06311 | 1.73009 | 0.00075  | 0.00344842  |
| 1.34079  | 2.79956  | 1.06211 | 1.8238  | 0.0002   | 0.00110793  |

|          |          |         |         |          |             |
|----------|----------|---------|---------|----------|-------------|
| 1.66093  | 3.46732  | 1.06183 | 1.93458 | 0.00035  | 0.00180697  |
| 7.66229  | 15.9916  | 1.06147 | 2.25524 | 5.00E-05 | 0.000323538 |
| 2.86192  | 5.97286  | 1.06144 | 2.01979 | 0.0001   | 0.000602691 |
| 1.75481  | 3.66199  | 1.06131 | 2.0667  | 5.00E-05 | 0.000323538 |
| 12.1359  | 25.3151  | 1.06071 | 2.55938 | 5.00E-05 | 0.000323538 |
| 15.3907  | 32.0904  | 1.06009 | 3.71183 | 5.00E-05 | 0.000323538 |
| 7.70507  | 16.0587  | 1.05947 | 2.29732 | 5.00E-05 | 0.000323538 |
| 0.348518 | 0.726322 | 1.05938 | 1.3576  | 0.0138   | 0.0393392   |
| 5.61533  | 11.701   | 1.05919 | 2.45431 | 5.00E-05 | 0.000323538 |
| 138.189  | 287.893  | 1.05889 | 3.60527 | 5.00E-05 | 0.000323538 |
| 0.98251  | 2.04583  | 1.05814 | 2.03282 | 5.00E-05 | 0.000323538 |
| 5.41052  | 11.2648  | 1.05798 | 2.77282 | 5.00E-05 | 0.000323538 |
| 20.109   | 41.8637  | 1.05786 | 3.56987 | 5.00E-05 | 0.000323538 |
| 5.68025  | 11.8234  | 1.05762 | 1.48201 | 0.001    | 0.00440912  |
| 3.70328  | 7.70676  | 1.05732 | 2.8982  | 5.00E-05 | 0.000323538 |
| 37.3838  | 77.776   | 1.05691 | 3.83419 | 5.00E-05 | 0.000323538 |
| 0.507273 | 1.0553   | 1.05681 | 1.11503 | 0.01115  | 0.0330309   |
| 4.68315  | 9.73921  | 1.05633 | 3.24173 | 5.00E-05 | 0.000323538 |
| 23.3186  | 48.4726  | 1.05569 | 3.94982 | 5.00E-05 | 0.000323538 |
| 15.949   | 33.1303  | 1.05468 | 3.99487 | 5.00E-05 | 0.000323538 |
| 13.9351  | 28.9247  | 1.05358 | 2.73054 | 5.00E-05 | 0.000323538 |
| 20.0306  | 41.5692  | 1.05331 | 3.8549  | 5.00E-05 | 0.000323538 |
| 10.238   | 21.2401  | 1.05286 | 3.77121 | 5.00E-05 | 0.000323538 |
| 17.9063  | 37.1221  | 1.05181 | 3.99574 | 5.00E-05 | 0.000323538 |
| 0.342493 | 0.709745 | 1.05123 | 1.03021 | 0.01545  | 0.042995    |
| 2.21049  | 4.5796   | 1.05086 | 2.40525 | 5.00E-05 | 0.000323538 |
| 25.6209  | 53.0734  | 1.05067 | 3.63355 | 5.00E-05 | 0.000323538 |
| 10.8046  | 22.3811  | 1.05064 | 3.6029  | 5.00E-05 | 0.000323538 |
| 29.1785  | 60.4386  | 1.05056 | 3.74574 | 5.00E-05 | 0.000323538 |
| 8.31456  | 17.2182  | 1.05023 | 3.06441 | 5.00E-05 | 0.000323538 |
| 3.58622  | 7.42336  | 1.04961 | 2.6876  | 5.00E-05 | 0.000323538 |
| 26.5098  | 54.8528  | 1.04904 | 3.70041 | 5.00E-05 | 0.000323538 |
| 8.3281   | 17.232   | 1.04903 | 2.36299 | 5.00E-05 | 0.000323538 |
| 15.4     | 31.8603  | 1.04883 | 2.90587 | 5.00E-05 | 0.000323538 |
| 58.1509  | 120.256  | 1.04823 | 3.42928 | 5.00E-05 | 0.000323538 |
| 8.30948  | 17.1828  | 1.04813 | 2.33599 | 5.00E-05 | 0.000323538 |
| 1.95915  | 4.05083  | 1.04799 | 1.57547 | 0.00065  | 0.00304972  |
| 4.74161  | 9.80267  | 1.0478  | 2.70399 | 5.00E-05 | 0.000323538 |
| 16.2414  | 33.5459  | 1.04646 | 3.47557 | 5.00E-05 | 0.000323538 |
| 1.24896  | 2.57844  | 1.04578 | 1.536   | 0.00045  | 0.00223165  |
| 6.51277  | 13.4448  | 1.04571 | 3.53734 | 5.00E-05 | 0.000323538 |

|          |          |         |         |          |             |
|----------|----------|---------|---------|----------|-------------|
| 9.56625  | 19.7454  | 1.04549 | 3.70478 | 5.00E-05 | 0.000323538 |
| 20.1927  | 41.6701  | 1.04518 | 3.70774 | 5.00E-05 | 0.000323538 |
| 1.88274  | 3.88218  | 1.04403 | 1.16301 | 0.0114   | 0.0336359   |
| 3.00707  | 6.19794  | 1.04343 | 1.27938 | 0.0047   | 0.0162391   |
| 0.370372 | 0.762621 | 1.04199 | 1.99586 | 5.00E-05 | 0.000323538 |
| 5.70529  | 11.7473  | 1.04195 | 2.3029  | 5.00E-05 | 0.000323538 |
| 0.994991 | 2.04768  | 1.04123 | 1.10266 | 0.01855  | 0.0498759   |
| 70.7527  | 145.607  | 1.04122 | 3.55398 | 5.00E-05 | 0.000323538 |
| 0.688254 | 1.41566  | 1.04047 | 1.37805 | 0.00115  | 0.00495975  |
| 2.827    | 5.8147   | 1.04043 | 2.80964 | 5.00E-05 | 0.000323538 |
| 3.5517   | 7.3052   | 1.04042 | 2.36844 | 5.00E-05 | 0.000323538 |
| 13.5354  | 27.8393  | 1.04038 | 4.00161 | 5.00E-05 | 0.000323538 |
| 1.34012  | 2.7554   | 1.0399  | 1.28771 | 0.0047   | 0.0162391   |
| 12.7184  | 26.1439  | 1.03956 | 3.51379 | 5.00E-05 | 0.000323538 |
| 15.906   | 32.6861  | 1.03911 | 2.20172 | 5.00E-05 | 0.000323538 |
| 2.17197  | 4.46296  | 1.039   | 2.46977 | 5.00E-05 | 0.000323538 |
| 1.80671  | 3.71198  | 1.03882 | 1.52092 | 0.0006   | 0.00285599  |
| 17.3404  | 35.6057  | 1.03797 | 3.47018 | 5.00E-05 | 0.000323538 |
| 3.71304  | 7.62182  | 1.03754 | 2.3944  | 5.00E-05 | 0.000323538 |
| 12.592   | 25.8441  | 1.03733 | 3.83227 | 5.00E-05 | 0.000323538 |
| 1.49639  | 3.07103  | 1.03724 | 1.80461 | 0.0001   | 0.000602691 |
| 49.6533  | 101.852  | 1.03651 | 2.40965 | 5.00E-05 | 0.000323538 |
| 2.40103  | 4.92515  | 1.03651 | 2.45235 | 5.00E-05 | 0.000323538 |
| 60.3701  | 123.809  | 1.03622 | 3.38045 | 5.00E-05 | 0.000323538 |
| 73.7689  | 151.282  | 1.03615 | 3.37839 | 5.00E-05 | 0.000323538 |
| 40.0874  | 82.1991  | 1.03597 | 1.93143 | 5.00E-05 | 0.000323538 |
| 0.758377 | 1.55423  | 1.03521 | 1.08953 | 0.01415  | 0.0401376   |
| 1.59687  | 3.27188  | 1.03487 | 1.75768 | 0.0002   | 0.00110793  |
| 4.59923  | 9.41829  | 1.03407 | 2.68065 | 5.00E-05 | 0.000323538 |
| 6.96483  | 14.2588  | 1.03369 | 2.6418  | 5.00E-05 | 0.000323538 |
| 9.11697  | 18.6616  | 1.03345 | 1.33498 | 0.0029   | 0.0108309   |
| 2.18268  | 4.46707  | 1.03323 | 2.20302 | 5.00E-05 | 0.000323538 |
| 37.4127  | 76.5466  | 1.03281 | 3.14386 | 5.00E-05 | 0.000323538 |
| 19.9598  | 40.836   | 1.03274 | 2.38909 | 5.00E-05 | 0.000323538 |
| 0.475675 | 0.972721 | 1.03205 | 1.1161  | 0.00915  | 0.02816     |
| 1.66487  | 3.40403  | 1.03183 | 2.34056 | 5.00E-05 | 0.000323538 |
| 41.1335  | 84.1002  | 1.0318  | 4.25768 | 5.00E-05 | 0.000323538 |
| 5.41112  | 11.0599  | 1.03134 | 2.95919 | 5.00E-05 | 0.000323538 |
| 0.445919 | 0.911089 | 1.03081 | 1.04706 | 0.01825  | 0.0492495   |
| 2.73896  | 5.59612  | 1.0308  | 2.47424 | 5.00E-05 | 0.000323538 |
| 0.750681 | 1.53321  | 1.03028 | 1.16983 | 0.0074   | 0.0237286   |

|          |         |         |         |          |             |
|----------|---------|---------|---------|----------|-------------|
| 10.3606  | 21.1591 | 1.03017 | 3.82294 | 5.00E-05 | 0.000323538 |
| 4.37552  | 8.93245 | 1.0296  | 1.20482 | 0.0118   | 0.0345937   |
| 3.82066  | 7.79865 | 1.0294  | 1.95233 | 5.00E-05 | 0.000323538 |
| 3.30251  | 6.73805 | 1.02877 | 2.67239 | 5.00E-05 | 0.000323538 |
| 6.47424  | 13.2087 | 1.0287  | 3.28144 | 5.00E-05 | 0.000323538 |
| 1.00198  | 2.04323 | 1.028   | 1.41648 | 0.00125  | 0.00531489  |
| 8.57504  | 17.4855 | 1.02794 | 3.19795 | 5.00E-05 | 0.000323538 |
| 0.967328 | 1.97221 | 1.02773 | 1.74833 | 5.00E-05 | 0.000323538 |
| 8.90043  | 18.1453 | 1.02765 | 3.244   | 5.00E-05 | 0.000323538 |
| 89.6398  | 182.742 | 1.0276  | 3.42767 | 5.00E-05 | 0.000323538 |
| 3.30922  | 6.74509 | 1.02735 | 1.92774 | 5.00E-05 | 0.000323538 |
| 1.92776  | 3.92661 | 1.02636 | 1.84441 | 5.00E-05 | 0.000323538 |
| 25.5959  | 52.1314 | 1.02624 | 3.24491 | 5.00E-05 | 0.000323538 |
| 74.5196  | 151.683 | 1.02536 | 3.36676 | 5.00E-05 | 0.000323538 |
| 16.474   | 33.5263 | 1.02511 | 3.52597 | 5.00E-05 | 0.000323538 |
| 18.7018  | 38.0517 | 1.02479 | 3.19537 | 5.00E-05 | 0.000323538 |
| 3.60767  | 7.33508 | 1.02374 | 3.47186 | 5.00E-05 | 0.000323538 |
| 2.04261  | 4.15292 | 1.02371 | 1.29271 | 0.00895  | 0.0276836   |
| 8.25973  | 16.7926 | 1.02366 | 2.98362 | 5.00E-05 | 0.000323538 |
| 4.44954  | 9.04442 | 1.02337 | 1.62229 | 0.00015  | 0.000860006 |
| 12.3272  | 25.0467 | 1.02278 | 3.09869 | 5.00E-05 | 0.000323538 |
| 0.828835 | 1.68393 | 1.02267 | 1.36315 | 0.009    | 0.0277962   |
| 22.1688  | 45.0216 | 1.02208 | 3.69433 | 5.00E-05 | 0.000323538 |
| 7.81127  | 15.8608 | 1.02184 | 3.35012 | 5.00E-05 | 0.000323538 |
| 4.31411  | 8.75603 | 1.02121 | 2.47074 | 5.00E-05 | 0.000323538 |
| 78.5312  | 159.357 | 1.02093 | 1.41832 | 0.0011   | 0.004771    |
| 6.55698  | 13.2993 | 1.02025 | 2.8049  | 5.00E-05 | 0.000323538 |
| 164.244  | 332.91  | 1.0193  | 3.19905 | 5.00E-05 | 0.000323538 |
| 1.34016  | 2.71635 | 1.01926 | 2.09746 | 5.00E-05 | 0.000323538 |
| 2.55112  | 5.16848 | 1.01861 | 2.443   | 5.00E-05 | 0.000323538 |
| 14.18    | 28.7115 | 1.01777 | 2.53912 | 5.00E-05 | 0.000323538 |
| 20.8655  | 42.2322 | 1.01722 | 3.18909 | 5.00E-05 | 0.000323538 |
| 38.9722  | 78.8675 | 1.01699 | 2.91764 | 5.00E-05 | 0.000323538 |
| 11.5038  | 23.2789 | 1.01691 | 3.47453 | 5.00E-05 | 0.000323538 |
| 49.5285  | 100.214 | 1.01675 | 2.84433 | 5.00E-05 | 0.000323538 |
| 0.740645 | 1.4978  | 1.01599 | 1.24115 | 0.0068   | 0.0221606   |
| 12.7374  | 25.7583 | 1.01596 | 3.31975 | 5.00E-05 | 0.000323538 |
| 5.65185  | 11.4265 | 1.01558 | 2.4456  | 5.00E-05 | 0.000323538 |
| 1.48441  | 3.00102 | 1.01556 | 1.94487 | 5.00E-05 | 0.000323538 |
| 10.8495  | 21.9296 | 1.01525 | 3.63264 | 5.00E-05 | 0.000323538 |
| 11.3314  | 22.9034 | 1.01524 | 2.90057 | 5.00E-05 | 0.000323538 |

|          |         |         |         |          |             |
|----------|---------|---------|---------|----------|-------------|
| 43.5745  | 88.0374 | 1.01463 | 3.30537 | 5.00E-05 | 0.000323538 |
| 3.76083  | 7.59454 | 1.01391 | 2.42839 | 5.00E-05 | 0.000323538 |
| 0.775371 | 1.5655  | 1.01366 | 1.22723 | 0.0043   | 0.0151245   |
| 23.856   | 48.1468 | 1.01309 | 3.48924 | 5.00E-05 | 0.000323538 |
| 18.3697  | 37.0627 | 1.01264 | 4.01418 | 5.00E-05 | 0.000323538 |
| 1.26305  | 2.54801 | 1.01246 | 1.34571 | 0.00205  | 0.00809422  |
| 52.3984  | 105.676 | 1.01206 | 3.34885 | 5.00E-05 | 0.000323538 |
| 7.19233  | 14.505  | 1.01202 | 2.47829 | 5.00E-05 | 0.000323538 |
| 82.3159  | 166.002 | 1.01196 | 3.54324 | 5.00E-05 | 0.000323538 |
| 113.732  | 229.297 | 1.01158 | 3.6807  | 5.00E-05 | 0.000323538 |
| 7.77797  | 15.681  | 1.01155 | 2.75004 | 5.00E-05 | 0.000323538 |
| 25.1304  | 50.6559 | 1.0113  | 2.63355 | 5.00E-05 | 0.000323538 |
| 6.28226  | 12.6625 | 1.0112  | 3.93344 | 5.00E-05 | 0.000323538 |
| 29.2346  | 58.8949 | 1.01047 | 3.54684 | 5.00E-05 | 0.000323538 |
| 2.60608  | 5.24927 | 1.01023 | 2.65077 | 5.00E-05 | 0.000323538 |
| 6.35497  | 12.7992 | 1.0101  | 3.15348 | 5.00E-05 | 0.000323538 |
| 1.0338   | 2.08206 | 1.01005 | 2.00824 | 0.00015  | 0.000860006 |
| 10.4823  | 21.1105 | 1.01001 | 2.83959 | 5.00E-05 | 0.000323538 |
| 1.15035  | 2.31658 | 1.00992 | 1.80585 | 0.0001   | 0.000602691 |
| 4.82434  | 9.71351 | 1.00966 | 2.62802 | 5.00E-05 | 0.000323538 |
| 93.0836  | 187.311 | 1.00884 | 3.64639 | 5.00E-05 | 0.000323538 |
| 7.32966  | 14.7483 | 1.00873 | 2.7755  | 5.00E-05 | 0.000323538 |
| 7.00945  | 14.1029 | 1.00862 | 1.78711 | 5.00E-05 | 0.000323538 |
| 10.7224  | 21.5672 | 1.00821 | 3.02161 | 5.00E-05 | 0.000323538 |
| 0.866648 | 1.74286 | 1.00794 | 1.44503 | 0.0012   | 0.00513439  |
| 151.709  | 304.879 | 1.00693 | 3.7073  | 5.00E-05 | 0.000323538 |
| 2.67018  | 5.36448 | 1.0065  | 2.36393 | 5.00E-05 | 0.000323538 |
| 5.50755  | 11.0646 | 1.00647 | 1.84748 | 0.00015  | 0.000860006 |
| 8.69054  | 17.4553 | 1.00614 | 3.19233 | 5.00E-05 | 0.000323538 |
| 6.95742  | 13.9723 | 1.00595 | 3.12106 | 5.00E-05 | 0.000323538 |
| 11.6912  | 23.4656 | 1.00512 | 1.6126  | 0.00085  | 0.00384468  |
| 1.71866  | 3.44927 | 1.00501 | 2.06026 | 5.00E-05 | 0.000323538 |
| 23.9767  | 48.1022 | 1.00447 | 3.47105 | 5.00E-05 | 0.000323538 |
| 35.3708  | 70.9555 | 1.00435 | 1.66978 | 0.0002   | 0.00110793  |
| 24.2064  | 48.5345 | 1.00362 | 4.03632 | 5.00E-05 | 0.000323538 |
| 5.67363  | 11.3747 | 1.00349 | 1.99082 | 5.00E-05 | 0.000323538 |
| 5.44863  | 10.919  | 1.00287 | 3.34747 | 5.00E-05 | 0.000323538 |
| 1.52536  | 3.05535 | 1.00219 | 1.36624 | 0.0021   | 0.00824731  |
| 3.47957  | 6.96797 | 1.00183 | 2.66226 | 5.00E-05 | 0.000323538 |
| 24.0477  | 48.1262 | 1.00092 | 3.78954 | 5.00E-05 | 0.000323538 |
| 2.10071  | 4.2028  | 1.00048 | 1.41263 | 0.00305  | 0.0113083   |

|         |         |          |          |          |             |
|---------|---------|----------|----------|----------|-------------|
| 5.59245 | 11.188  | 1.0004   | 3.22501  | 5.00E-05 | 0.000323538 |
| 6.07785 | 12.1566 | 1.00011  | 2.71607  | 5.00E-05 | 0.000323538 |
| 179.15  | 270.06  | 0.59211  | 1.98623  | 5.00E-05 | 0.000323538 |
| 36.3117 | 45.1358 | 0.313837 | 1.02051  | 0.01365  | 0.0389903   |
| 68.8716 | 85.256  | 0.307893 | 0.990779 | 0.01455  | 0.041044    |



significant

yes

















































yes

yes

yes

yes

yes
