# Supplementary material for: Mechanisms underlying the enhanced biomass and abiotic stress tolerance phenotype of an Arabidopsis MIOX over‐expresser
Source: PubMed Central journal article supplement — Plant Direct. 2019 Sep 2;3(9):e00165. doi: 10.1002/pld3.165 (PMC6718051; doi:10.1002/pld3.165), 2019-09-02
Supplement: PLD3-3-e00165-s003.pdf [file PLD3-3-e00165-s003.pdf]

| test_id   | gene_id   | gene   | locus               | sample_1 | sample_2 | status |
|-----------|-----------|--------|---------------------|----------|----------|--------|
| AT3G24065 | AT3G24065 | -      | 3:8690736-8691144   | WT       | MIOX     | OK     |
| AT5G48430 | AT5G48430 | -      | 5:19627711-19629163 | WT       | MIOX     | OK     |
| AT1G53480 | AT1G53480 | MRD1   | 1:19963046-19969757 | WT       | MIOX     | OK     |
| AT2G07767 | AT2G07767 | -      | 2:3272148-3272518   | WT       | MIOX     | OK     |
| AT3G49330 | AT3G49330 | -      | 3:18291487-18292048 | WT       | MIOX     | OK     |
| AT5G12880 | AT5G12880 | -      | 5:4068518-4068962   | WT       | MIOX     | OK     |
| AT3G49070 | AT3G49070 | -      | 3:18192478-18193729 | WT       | MIOX     | OK     |
| AT5G59845 | AT5G59845 | GASA10 | 5:24111323-24112020 | WT       | MIOX     | OK     |
| AT3G59900 | AT3G59900 | ARGOS  | 3:22129725-22130464 | WT       | MIOX     | OK     |
| AT5G09805 | AT5G09805 | IDL3   | 5:3047217-3047517   | WT       | MIOX     | OK     |
| AT3G17130 | AT3G17130 | -      | 3:5844494-5845046   | WT       | MIOX     | OK     |
| AT4G18425 | AT4G18425 | -      | 4:10181333-10182140 | WT       | MIOX     | OK     |
| AT3G22070 | AT3G22070 | -      | 3:7775328-7776207   | WT       | MIOX     | OK     |
| AT3G21550 | AT3G21550 | DMP2   | 3:7591482-7592322   | WT       | MIOX     | OK     |
| AT1G26820 | AT1G26820 | RNS3   | 1:9292445-9293784   | WT       | MIOX     | OK     |
| AT5G03260 | AT5G03260 | LAC11  | 5:774400-779424     | WT       | MIOX     | OK     |
| AT5G48920 | AT5G48920 | TED7   | 5:19835336-19836122 | WT       | MIOX     | OK     |
| AT2G31940 | AT2G31940 | -      | 2:13580599-13581112 | WT       | MIOX     | OK     |
| AT1G02335 | AT1G02335 | GL22   | 1:463854-464924     | WT       | MIOX     | OK     |
| AT3G28510 | AT3G28510 | -      | 3:10685523-10687364 | WT       | MIOX     | OK     |
| AT1G68725 | AT1G68725 | AGP19  | 1:25809297-25810130 | WT       | MIOX     | OK     |
| AT2G14610 | AT2G14610 | PR1    | 2:6241703-6242463   | WT       | MIOX     | OK     |
| AT4G36620 | AT4G36620 | GATA19 | 4:17268905-17269743 | WT       | MIOX     | OK     |
| AT5G04200 | AT5G04200 | AMC9   | 5:1153789-1155040   | WT       | MIOX     | OK     |
| AT3G16670 | AT3G16670 | -      | 3:5681418-5682331   | WT       | MIOX     | OK     |
| AT4G16260 | AT4G16260 | -      | 4:9200009-9201552   | WT       | MIOX     | OK     |
| AT5G11920 | AT5G11920 | CWINV6 | 5:3839390-3842371   | WT       | MIOX     | OK     |
| AT4G36570 | AT4G36570 | ATRL3  | 4:17254659-17255716 | WT       | MIOX     | OK     |
| AT4G19430 | AT4G19430 | -      | 4:10598444-10599151 | WT       | MIOX     | OK     |
| AT4G40090 | AT4G40090 | AGP3   | 4:18580837-18581585 | WT       | MIOX     | OK     |
| AT3G20570 | AT3G20570 | ENODL9 | 3:7182034-7187521   | WT       | MIOX     | OK     |
| AT5G45469 | AT5G45469 | -      | 5:18421743-18421962 | WT       | MIOX     | OK     |
| AT1G43790 | AT1G43790 | TED6   | 1:16575894-16576417 | WT       | MIOX     | OK     |
| AT3G14981 | AT3G14981 | -      | 3:5039930-5045403   | WT       | MIOX     | OK     |
| AT1G47578 | AT1G47578 | -      | 1:17484364-17485470 | WT       | MIOX     | OK     |
| AT2G34790 | AT2G34790 | MEE23  | 2:14668439-14677270 | WT       | MIOX     | OK     |
| AT5G02090 | AT5G02090 | -      | 5:412030-412698     | WT       | MIOX     | OK     |
| AT1G56555 | AT1G56555 | -      | 1:21191120-21192217 | WT       | MIOX     | OK     |
| AT5G11990 | AT5G11990 | -      | 5:3872650-3873196   | WT       | MIOX     | OK     |
| AT5G51890 | AT5G51890 | PER66  | 5:21090991-21092405 | WT       | MIOX     | OK     |

|           |           |         |                     |    |      |    |
|-----------|-----------|---------|---------------------|----|------|----|
| AT1G05420 | AT1G05420 | OFP12   | 1:1590072-1590753   | WT | MIOX | OK |
| AT1G65310 | AT1G65310 | XTH17   | 1:24257215-24258473 | WT | MIOX | OK |
| AT3G59510 | AT3G59510 | -       | 3:21988452-21989712 | WT | MIOX | OK |
| AT1G11500 | AT1G11500 | -       | 1:3870832-3871570   | WT | MIOX | OK |
| AT3G62960 | AT3G62960 | GRXC14  | 3:23268709-23269324 | WT | MIOX | OK |
| AT1G12100 | AT1G12100 | -       | 1:4095245-4095845   | WT | MIOX | OK |
| AT4G33810 | AT4G33810 | -       | 4:16213323-16215594 | WT | MIOX | OK |
| AT4G19810 | AT4G19810 | -       | 4:10763933-10765753 | WT | MIOX | OK |
| AT4G32950 | AT4G32950 | -       | 4:15904443-15906010 | WT | MIOX | OK |
| AT2G26390 | AT2G26390 | -       | 2:11229086-11230491 | WT | MIOX | OK |
| AT5G20630 | AT5G20630 | GER3    | 5:6975103-6975993   | WT | MIOX | OK |
| AT1G19840 | AT1G19840 | -       | 1:6872793-6873255   | WT | MIOX | OK |
| AT1G21326 | AT1G21326 | -       | 1:7469001-7469721   | WT | MIOX | OK |
| AT1G58370 | AT1G58370 | RXF12   | 1:21684583-21688321 | WT | MIOX | OK |
| AT2G14620 | AT2G14620 | XTH10   | 2:6244780-6246233   | WT | MIOX | OK |
| AT5G60020 | AT5G60020 | LAC17   | 5:24167140-24170462 | WT | MIOX | OK |
| AT3G04290 | AT3G04290 | LTL1    | 3:1133319-1136316   | WT | MIOX | OK |
| AT3G05730 | AT3G05730 | -       | 3:1695975-1696708   | WT | MIOX | OK |
| AT2G26400 | AT2G26400 | ARD1    | 2:11231799-11233295 | WT | MIOX | OK |
| AT1G77992 | AT1G77992 | -       | 1:29317898-29323358 | WT | MIOX | OK |
| AT5G15780 | AT5G15780 | -       | 5:5144726-5146403   | WT | MIOX | OK |
| AT5G56050 | AT5G56050 | -       | 5:22700961-22702116 | WT | MIOX | OK |
| AT3G24535 | AT3G24535 | -       | 3:8952005-8952572   | WT | MIOX | OK |
| AT5G61160 | AT5G61160 | ACT     | 5:24608723-24610304 | WT | MIOX | OK |
| AT5G08480 | AT5G08480 | VQ31    | 5:2743619-2745111   | WT | MIOX | OK |
| AT5G23400 | AT5G23400 | -       | 5:7880334-7882634   | WT | MIOX | OK |
| AT3G15800 | AT3G15800 | -       | 3:5345050-5346988   | WT | MIOX | OK |
| AT4G08950 | AT4G08950 | EXO     | 4:5740296-5741524   | WT | MIOX | OK |
| AT1G65870 | AT1G65870 | DIR21   | 1:24503623-24504193 | WT | MIOX | OK |
| AT4G35970 | AT4G35970 | APX5    | 4:17028605-17030293 | WT | MIOX | OK |
| AT1G62510 | AT1G62510 | -       | 1:23136368-23137191 | WT | MIOX | OK |
| AT5G45320 | AT5G45320 | -       | 5:18362110-18363168 | WT | MIOX | OK |
| AT3G22142 | AT3G22142 | -       | 3:7803603-7808046   | WT | MIOX | OK |
| AT2G13810 | AT2G13810 | ALD1    | 2:5768445-5772259   | WT | MIOX | OK |
| AT1G11190 | AT1G11190 | ENDO1   | 1:3750065-3752780   | WT | MIOX | OK |
| AT5G40980 | AT5G40980 | -       | 5:16414847-16415220 | WT | MIOX | OK |
| AT5G23370 | AT5G23370 | -       | 5:7863330-7864271   | WT | MIOX | OK |
| AT4G36410 | AT4G36410 | UBC17   | 4:17201921-17202988 | WT | MIOX | OK |
| AT1G38131 | AT1G38131 | -       | 1:14293063-14296191 | WT | MIOX | OK |
| AT1G68230 | AT1G68230 | RTNLB14 | 1:25572184-25572921 | WT | MIOX | OK |
| AT1G77700 | AT1G77700 | -       | 1:29204746-29206217 | WT | MIOX | OK |

|           |           |         |                     |    |      |    |
|-----------|-----------|---------|---------------------|----|------|----|
| AT1G20850 | AT1G20850 | XCP2    | 1:7252173-7253731   | WT | MIOX | OK |
| AT3G28857 | AT3G28857 | PRE5    | 3:10855631-10856624 | WT | MIOX | OK |
| AT3G14840 | AT3G14840 | LRR-RLK | 3:4988106-4994058   | WT | MIOX | OK |
| AT5G56540 | AT5G56540 | AGP14   | 5:22893150-22893642 | WT | MIOX | OK |
| AT1G60360 | AT1G60360 | -       | 1:22242747-22243731 | WT | MIOX | OK |
| AT4G24180 | AT4G24180 | TLP1    | 4:12550355-12551299 | WT | MIOX | OK |
| AT1G74055 | AT1G74055 | -       | 1:27849229-27849812 | WT | MIOX | OK |
| AT5G20870 | AT5G20870 | -       | 5:7079974-7081769   | WT | MIOX | OK |
| AT3G16070 | AT3G16070 | -       | 3:5451863-5452316   | WT | MIOX | OK |
| AT1G12260 | AT1G12260 | NAC007  | 1:4162831-4165852   | WT | MIOX | OK |
| AT3G14780 | AT3G14780 | -       | 3:4961805-4963544   | WT | MIOX | OK |
| AT1G52905 | AT1G52905 | -       | 1:19706084-19706706 | WT | MIOX | OK |
| AT1G03502 | AT1G03502 | -       | 1:875357-875471     | WT | MIOX | OK |
| AT4G00890 | AT4G00890 | -       | 4:373959-375350     | WT | MIOX | OK |
| AT3G62160 | AT3G62160 | -       | 3:23014207-23015839 | WT | MIOX | OK |
| AT1G26600 | AT1G26600 | CLE9    | 1:9191606-9192401   | WT | MIOX | OK |
| AT5G56230 | AT5G56230 | PRA1G2  | 5:22758767-22759371 | WT | MIOX | OK |
| AT1G49210 | AT1G49210 | ATL76   | 1:18201888-18202764 | WT | MIOX | OK |
| AT1G75000 | AT1G75000 | -       | 1:28163649-28164586 | WT | MIOX | OK |
| AT5G13250 | AT5G13250 | -       | 5:4234268-4241746   | WT | MIOX | OK |
| AT5G57080 | AT5G57080 | -       | 5:23098958-23099368 | WT | MIOX | OK |
| AT3G12460 | AT3G12460 | -       | 3:3954694-3955423   | WT | MIOX | OK |
| AT2G19582 | AT2G19582 | -       | 2:8472133-8475221   | WT | MIOX | OK |
| AT4G05440 | AT4G05440 | EDA35   | 4:2757213-2758275   | WT | MIOX | OK |
| AT5G15180 | AT5G15180 | PER56   | 5:4930518-4932363   | WT | MIOX | OK |
| AT1G33440 | AT1G33440 | NPF4.4  | 1:12127388-12130407 | WT | MIOX | OK |
| AT4G31840 | AT4G31840 | ENODL15 | 4:15401639-15402617 | WT | MIOX | OK |
| AT4G30097 | AT4G30097 | -       | 4:14713517-14713661 | WT | MIOX | OK |
| AT1G69320 | AT1G69320 | CLE10   | 1:26061861-26062514 | WT | MIOX | OK |
| AT4G39410 | AT4G39410 | WRKY13  | 4:18332877-18334789 | WT | MIOX | OK |
| AT1G78120 | AT1G78120 | TPR12   | 1:29393938-29396086 | WT | MIOX | OK |
| AT5G47920 | AT5G47920 | -       | 5:19403172-19404088 | WT | MIOX | OK |
| AT5G56720 | AT5G56720 | -       | 5:22945536-22946718 | WT | MIOX | OK |
| AT4G00700 | AT4G00700 | -       | 4:286050-289514     | WT | MIOX | OK |
| AT2G21140 | AT2G21140 | PRP2    | 2:9060624-9062091   | WT | MIOX | OK |
| AT3G16660 | AT3G16660 | -       | 3:5676828-5677921   | WT | MIOX | OK |
| AT5G23350 | AT5G23350 | -       | 5:7856188-7859387   | WT | MIOX | OK |
| AT4G08160 | AT4G08160 | -       | 4:5159033-5162774   | WT | MIOX | OK |
| AT1G79480 | AT1G79480 | -       | 1:29897726-29899604 | WT | MIOX | OK |
| AT5G10310 | AT5G10310 | EPFL1   | 5:3241517-3242266   | WT | MIOX | OK |
| AT4G23550 | AT4G23550 | WRKY29  | 4:12291819-12293096 | WT | MIOX | OK |

|           |           |         |                     |    |      |    |
|-----------|-----------|---------|---------------------|----|------|----|
| AT2G02930 | AT2G02930 | GSTF3   | 2:851163-852222     | WT | MIOX | OK |
| AT5G60720 | AT5G60720 | -       | 5:24418228-24422234 | WT | MIOX | OK |
| AT1G10000 | AT1G10000 | -       | 1:3263876-3264788   | WT | MIOX | OK |
| AT5G38780 | AT5G38780 | -       | 5:15530014-15531522 | WT | MIOX | OK |
| AT5G09530 | AT5G09530 | -       | 5:2959733-2961271   | WT | MIOX | OK |
| AT3G18010 | AT3G18010 | WOX1    | 3:6161136-6163272   | WT | MIOX | OK |
| AT5G62210 | AT5G62210 | -       | 5:24986326-24987489 | WT | MIOX | OK |
| AT4G13000 | AT4G13000 | -       | 4:7598092-7599257   | WT | MIOX | OK |
| AT1G35910 | AT1G35910 | TPPD    | 1:13363002-13365060 | WT | MIOX | OK |
| AT4G21740 | AT4G21740 | -       | 4:11545925-11546434 | WT | MIOX | OK |
| AT2G37900 | AT2G37900 | NPF5.6  | 2:15864395-15866408 | WT | MIOX | OK |
| AT3G18485 | AT3G18485 | ILR2    | 3:6341917-6343178   | WT | MIOX | OK |
| AT2G20562 | AT2G20562 | -       | 2:8850206-8850929   | WT | MIOX | OK |
| AT1G10990 | AT1G10990 | -       | 1:3670277-3671187   | WT | MIOX | OK |
| AT4G03270 | AT4G03270 | CYCD6-1 | 4:1432374-1433691   | WT | MIOX | OK |
| AT5G18690 | AT5G18690 | AGP25   | 5:6233518-6234206   | WT | MIOX | OK |
| AT1G70985 | AT1G70985 | -       | 1:26764671-26765285 | WT | MIOX | OK |
| AT4G30230 | AT4G30230 | -       | 4:14806344-14807425 | WT | MIOX | OK |
| AT1G18880 | AT1G18880 | NPF2.9  | 1:6520747-6525962   | WT | MIOX | OK |
| AT1G29520 | AT1G29520 | -       | 1:10323654-10324743 | WT | MIOX | OK |
| AT4G26830 | AT4G26830 | -       | 4:13494571-13496487 | WT | MIOX | OK |
| AT5G17330 | AT5G17330 | GAD1    | 5:5711011-5715075   | WT | MIOX | OK |
| AT5G19240 | AT5G19240 | -       | 5:6470128-6471062   | WT | MIOX | OK |
| AT5G48060 | AT5G48060 | -       | 5:19475295-19479002 | WT | MIOX | OK |
| AT2G46970 | AT2G46970 | PIL1    | 2:19295489-19297826 | WT | MIOX | OK |
| AT1G77390 | AT1G77390 | CYCA1-2 | 1:29081903-29084285 | WT | MIOX | OK |
| AT2G29130 | AT2G29130 | LAC2    | 2:12524888-12527747 | WT | MIOX | OK |
| AT3G57740 | AT3G57740 | -       | 3:21392670-21393744 | WT | MIOX | OK |
| AT3G06120 | AT3G06120 | MUTE    | 3:1846530-1848230   | WT | MIOX | OK |
| AT1G49230 | AT1G49230 | ATL78   | 1:18209260-18210128 | WT | MIOX | OK |
| AT1G23460 | AT1G23460 | -       | 1:8327311-8329622   | WT | MIOX | OK |
| AT3G07420 | AT3G07420 | SYNC2   | 3:2373976-2376744   | WT | MIOX | OK |
| AT2G38080 | AT2G38080 | IRX12   | 2:15934459-15937616 | WT | MIOX | OK |
| AT5G22930 | AT5G22930 | -       | 5:7668228-7669315   | WT | MIOX | OK |
| AT2G12461 | AT2G12461 | -       | 2:5049952-5050087   | WT | MIOX | OK |
| AT5G64310 | AT5G64310 | AGP1    | 5:25721932-25722646 | WT | MIOX | OK |
| AT4G35350 | AT4G35350 | XCP1    | 4:16810481-16812009 | WT | MIOX | OK |
| AT1G14540 | AT1G14540 | PER4    | 1:4974066-4975705   | WT | MIOX | OK |
| AT5G10770 | AT5G10770 | -       | 5:3403109-3405448   | WT | MIOX | OK |
| AT4G09950 | AT4G09950 | -       | 4:6234761-6236312   | WT | MIOX | OK |
| AT1G08160 | AT1G08160 | -       | 1:2559486-2560403   | WT | MIOX | OK |

|           |           |          |                     |    |      |    |
|-----------|-----------|----------|---------------------|----|------|----|
| AT1G55265 | AT1G55265 | -        | 1:20617312-20620136 | WT | MIOX | OK |
| AT3G54400 | AT3G54400 | -        | 3:20140057-20142642 | WT | MIOX | OK |
| AT5G26690 | AT5G26690 | -        | 5:9310796-9311572   | WT | MIOX | OK |
| AT1G04110 | AT1G04110 | SBT1.2   | 1:1061456-1063784   | WT | MIOX | OK |
| AT1G05310 | AT1G05310 | PME8     | 1:1550542-1552517   | WT | MIOX | OK |
| AT5G08350 | AT5G08350 | -        | 5:2686244-2687251   | WT | MIOX | OK |
| AT5G67450 | AT5G67450 | AZF1     | 5:26918792-26919949 | WT | MIOX | OK |
| AT3G18660 | AT3G18660 | GUX1     | 3:6419030-6422002   | WT | MIOX | OK |
| AT1G24577 | AT1G24577 | -        | 1:8712477-8713032   | WT | MIOX | OK |
| AT4G31330 | AT4G31330 | -        | 4:15202295-15203431 | WT | MIOX | OK |
| AT5G14110 | AT5G14110 | -        | 5:4553805-4554382   | WT | MIOX | OK |
| AT4G14390 | AT4G14390 | -        | 4:8289643-8292083   | WT | MIOX | OK |
| AT4G01390 | AT4G01390 | -        | 4:570241-571595     | WT | MIOX | OK |
| AT1G66600 | AT1G66600 | WRKY63   | 1:24848319-24849364 | WT | MIOX | OK |
| AT1G35230 | AT1G35230 | AGP5     | 1:12917148-12917763 | WT | MIOX | OK |
| AT3G62820 | AT3G62820 | -        | 3:23229748-23230501 | WT | MIOX | OK |
| AT5G42720 | AT5G42720 | -        | 5:17130185-17132843 | WT | MIOX | OK |
| AT3G05180 | AT3G05180 | -        | 3:1466572-1470551   | WT | MIOX | OK |
| AT1G14430 | AT1G14430 | -        | 1:4934119-4936100   | WT | MIOX | OK |
| AT3G46900 | AT3G46900 | COPT2    | 3:17268874-17269510 | WT | MIOX | OK |
| AT5G02550 | AT5G02550 | -        | 5:573053-573558     | WT | MIOX | OK |
| AT4G15660 | AT4G15660 | GRXS8    | 4:8925805-8926310   | WT | MIOX | OK |
| AT1G21880 | AT1G21880 | LYM1     | 1:7680480-7685662   | WT | MIOX | OK |
| AT5G60660 | AT5G60660 | PIP2-4   | 5:24375456-24376989 | WT | MIOX | OK |
| AT5G40020 | AT5G40020 | -        | 5:16022752-16024316 | WT | MIOX | OK |
| AT3G48850 | AT3G48850 | MPT2     | 3:18114525-18116499 | WT | MIOX | OK |
| AT2G33710 | AT2G33710 | ERF112   | 2:14258508-14260739 | WT | MIOX | OK |
| AT4G18780 | AT4G18780 | CESA8    | 4:10311029-10316790 | WT | MIOX | OK |
| AT4G18501 | AT4G18501 | -        | 4:10209147-10209733 | WT | MIOX | OK |
| AT3G19250 | AT3G19250 | -        | 3:6666841-6668395   | WT | MIOX | OK |
| AT2G31945 | AT2G31945 | -        | 2:13581580-13582126 | WT | MIOX | OK |
| AT5G45740 | AT5G45740 | -        | 5:18556974-18558097 | WT | MIOX | OK |
| AT1G34245 | AT1G34245 | EPF2     | 1:12472867-12473754 | WT | MIOX | OK |
| AT4G03010 | AT4G03010 | -        | 4:1329951-1331139   | WT | MIOX | OK |
| AT5G08760 | AT5G08760 | -        | 5:2854939-2855617   | WT | MIOX | OK |
| AT1G66250 | AT1G66250 | -        | 1:24692893-24695515 | WT | MIOX | OK |
| AT1G33612 | AT1G33612 | -        | 1:12191311-12192849 | WT | MIOX | OK |
| AT5G60490 | AT5G60490 | FLA12    | 5:24325726-24326702 | WT | MIOX | OK |
| AT3G59010 | AT3G59010 | PME35    | 3:21802804-21805214 | WT | MIOX | OK |
| AT1G14880 | AT1G14880 | PCR1     | 1:5132534-5133716   | WT | MIOX | OK |
| AT3G26200 | AT3G26200 | CYP71B22 | 3:9589281-9591179   | WT | MIOX | OK |

|           |           |         |                     |    |      |    |
|-----------|-----------|---------|---------------------|----|------|----|
| AT1G63295 | AT1G63295 | -       | 1:23474068-23475532 | WT | MIOX | OK |
| AT5G67460 | AT5G67460 | -       | 5:26921583-26923274 | WT | MIOX | OK |
| AT2G44300 | AT2G44300 | -       | 2:18307308-18308349 | WT | MIOX | OK |
| AT5G44550 | AT5G44550 | -       | 5:17941874-17943213 | WT | MIOX | OK |
| AT1G66830 | AT1G66830 | -       | 1:24930664-24932918 | WT | MIOX | OK |
| AT4G16980 | AT4G16980 | -       | 4:9556977-9557812   | WT | MIOX | OK |
| AT2G04070 | AT2G04070 | DTXL2   | 2:1353754-1355790   | WT | MIOX | OK |
| AT5G01190 | AT5G01190 | LAC10   | 5:72391-74756       | WT | MIOX | OK |
| AT3G14190 | AT3G14190 | -       | 3:4710482-4711969   | WT | MIOX | OK |
| AT4G17030 | AT4G17030 | EXLB1   | 4:9581585-9583290   | WT | MIOX | OK |
| AT3G03200 | AT3G03200 | NAC045  | 3:736140-738527     | WT | MIOX | OK |
| AT5G18430 | AT5G18430 | -       | 5:6110254-6112029   | WT | MIOX | OK |
| AT5G50800 | AT5G50800 | SWEET13 | 5:20665076-20667304 | WT | MIOX | OK |
| AT1G73620 | AT1G73620 | -       | 1:27681407-27683130 | WT | MIOX | OK |
| AT3G18260 | AT3G18260 | RTNLB9  | 3:6260240-6261591   | WT | MIOX | OK |
| AT4G10500 | AT4G10500 | -       | 4:6491016-6492476   | WT | MIOX | OK |
| AT3G17640 | AT3G17640 | -       | 3:6032392-6033583   | WT | MIOX | OK |
| AT1G59740 | AT1G59740 | NPF4.3  | 1:21968070-21972411 | WT | MIOX | OK |
| AT1G77630 | AT1G77630 | LYM3    | 1:29173456-29175530 | WT | MIOX | OK |
| AT3G52450 | AT3G52450 | PUB22   | 3:19440738-19442383 | WT | MIOX | OK |
| AT5G46871 | AT5G46871 | -       | 5:19018100-19018443 | WT | MIOX | OK |
| AT1G12845 | AT1G12845 | -       | 1:4378938-4379516   | WT | MIOX | OK |
| AT5G41820 | AT5G41820 | RGTA2   | 5:16740803-16743433 | WT | MIOX | OK |
| AT3G57157 | AT3G57157 | -       | 3:21157010-21157247 | WT | MIOX | OK |
| AT3G23510 | AT3G23510 | -       | 3:8427659-8433314   | WT | MIOX | OK |
| AT5G54720 | AT5G54720 | -       | 5:22232194-22232949 | WT | MIOX | OK |
| AT3G06370 | AT3G06370 | NHX3    | 3:1930395-1934073   | WT | MIOX | OK |
| AT4G17860 | AT4G17860 | -       | 4:9924697-9926372   | WT | MIOX | OK |
| AT1G78860 | AT1G78860 | -       | 1:29646167-29647499 | WT | MIOX | OK |
| AT2G32960 | AT2G32960 | -       | 2:13987766-13990976 | WT | MIOX | OK |
| AT5G53210 | AT5G53210 | SPCH    | 5:21586605-21588941 | WT | MIOX | OK |
| AT2G36026 | AT2G36026 | -       | 2:15127264-15127816 | WT | MIOX | OK |
| AT1G78260 | AT1G78260 | -       | 1:29446984-29450515 | WT | MIOX | OK |
| AT3G18880 | AT3G18880 | -       | 3:6509539-6510625   | WT | MIOX | OK |
| AT5G64667 | AT5G64667 | IDL2    | 5:25850655-25851337 | WT | MIOX | OK |
| AT1G65390 | AT1G65390 | PP2A5   | 1:24292477-24294631 | WT | MIOX | OK |
| AT2G18380 | AT2G18380 | GATA20  | 2:7982867-7984096   | WT | MIOX | OK |
| AT5G42092 | AT5G42092 | -       | 5:16826697-16828454 | WT | MIOX | OK |
| AT5G19875 | AT5G19875 | -       | 5:6718340-6718995   | WT | MIOX | OK |
| AT5G48690 | AT5G48690 | -       | 5:19747025-19749061 | WT | MIOX | OK |
| AT3G06035 | AT3G06035 | -       | 3:1823098-1824216   | WT | MIOX | OK |

|           |           |         |                     |    |      |    |
|-----------|-----------|---------|---------------------|----|------|----|
| AT1G74290 | AT1G74290 | -       | 1:27931835-27934268 | WT | MIOX | OK |
| AT2G39690 | AT2G39690 | -       | 2:16541025-16543378 | WT | MIOX | OK |
| AT1G69970 | AT1G69970 | CLE26   | 1:26353046-26354256 | WT | MIOX | OK |
| AT5G02460 | AT5G02460 | DOF5.1  | 5:539248-541112     | WT | MIOX | OK |
| AT5G13510 | AT5G13510 | RPL10   | 5:4341261-4344671   | WT | MIOX | OK |
| AT4G28560 | AT4G28560 | RIC7    | 4:14116014-14117367 | WT | MIOX | OK |
| AT2G20875 | AT2G20875 | EPF1    | 2:8983073-8983612   | WT | MIOX | OK |
| AT1G16310 | AT1G16310 | MTP10   | 1:5578430-5580693   | WT | MIOX | OK |
| AT1G21240 | AT1G21240 | WAK3    | 1:7434302-7436830   | WT | MIOX | OK |
| AT4G19820 | AT4G19820 | -       | 4:10767435-10768614 | WT | MIOX | OK |
| AT1G51820 | AT1G51820 | -       | 1:19237406-19241883 | WT | MIOX | OK |
| AT3G27060 | AT3G27060 | TSO2    | 3:9979865-9981295   | WT | MIOX | OK |
| AT5G53830 | AT5G53830 | VQ33    | 5:21857049-21857984 | WT | MIOX | OK |
| AT5G64620 | AT5G64620 | C/VIF2  | 5:25831833-25832502 | WT | MIOX | OK |
| AT2G46630 | AT2G46630 | -       | 2:19145528-19146713 | WT | MIOX | OK |
| AT3G26440 | AT3G26440 | -       | 3:9676563-9679900   | WT | MIOX | OK |
| AT4G09030 | AT4G09030 | AGP10   | 4:5792206-5792790   | WT | MIOX | OK |
| AT1G71930 | AT1G71930 | NAC030  | 1:27076139-27077957 | WT | MIOX | OK |
| AT3G61898 | AT3G61898 | -       | 3:22922549-22922940 | WT | MIOX | OK |
| AT1G26945 | AT1G26945 | PRE6    | 1:9351453-9352761   | WT | MIOX | OK |
| AT1G02920 | AT1G02920 | GSTF7   | 1:658656-659771     | WT | MIOX | OK |
| AT4G37450 | AT4G37450 | AGP18   | 4:17605757-17606755 | WT | MIOX | OK |
| AT3G60840 | AT3G60840 | MAP65-4 | 3:22477572-22480463 | WT | MIOX | OK |
| AT5G09840 | AT5G09840 | -       | 5:3058996-3061970   | WT | MIOX | OK |
| AT2G28315 | AT2G28315 | -       | 2:12088876-12090701 | WT | MIOX | OK |
| AT3G24480 | AT3G24480 | LRX4    | 3:8901153-8902638   | WT | MIOX | OK |
| AT3G61770 | AT3G61770 | -       | 3:22864542-22866407 | WT | MIOX | OK |
| AT5G06800 | AT5G06800 | -       | 5:2103159-2105898   | WT | MIOX | OK |
| AT1G49470 | AT1G49470 | -       | 1:18310493-18311634 | WT | MIOX | OK |
| AT1G52155 | AT1G52155 | -       | 1:19417665-19419853 | WT | MIOX | OK |
| AT1G02930 | AT1G02930 | GSTF6   | 1:661176-662456     | WT | MIOX | OK |
| AT3G01960 | AT3G01960 | -       | 3:324580-325087     | WT | MIOX | OK |
| AT4G01950 | AT4G01950 | GPAT3   | 4:844408-846787     | WT | MIOX | OK |
| AT1G32100 | AT1G32100 | PRR1    | 1:11546337-11547994 | WT | MIOX | OK |
| AT5G04530 | AT5G04530 | KCS21   | 5:1291821-1293688   | WT | MIOX | OK |
| AT1G19968 | AT1G19968 | -       | 1:6930260-6930985   | WT | MIOX | OK |
| AT1G14730 | AT1G14730 | CYB561C | 1:5073104-5074779   | WT | MIOX | OK |
| AT2G04780 | AT2G04780 | FLA7    | 2:1676741-1678455   | WT | MIOX | OK |
| AT4G37445 | AT4G37445 | -       | 4:17604093-17604933 | WT | MIOX | OK |
| AT3G48540 | AT3G48540 | -       | 3:17989797-17992015 | WT | MIOX | OK |
| AT1G22690 | AT1G22690 | GASA9   | 1:8027293-8029971   | WT | MIOX | OK |

|           |           |         |                     |    |      |    |
|-----------|-----------|---------|---------------------|----|------|----|
| AT4G25420 | AT4G25420 | GA20OX1 | 4:12990883-12992458 | WT | MIOX | OK |
| AT3G02120 | AT3G02120 | -       | 3:377096-377713     | WT | MIOX | OK |
| AT4G27657 | AT4G27657 | -       | 4:13813043-13813516 | WT | MIOX | OK |
| AT2G23130 | AT2G23130 | AGP17   | 2:9844298-9845385   | WT | MIOX | OK |
| AT5G47800 | AT5G47800 | -       | 5:19353675-19356300 | WT | MIOX | OK |
| AT5G56170 | AT5G56170 | LLG1    | 5:22735914-22737311 | WT | MIOX | OK |
| AT1G27045 | AT1G27045 | ATHB-54 | 1:9391608-9393019   | WT | MIOX | OK |
| AT1G77020 | AT1G77020 | -       | 1:28944842-28947031 | WT | MIOX | OK |
| AT5G35740 | AT5G35740 | -       | 5:13910417-13911160 | WT | MIOX | OK |
| AT5G03510 | AT5G03510 | -       | 5:880224-881305     | WT | MIOX | OK |
| AT1G65060 | AT1G65060 | 4CL3    | 1:24167201-24171502 | WT | MIOX | OK |
| AT2G44080 | AT2G44080 | ARL     | 2:18237151-18238173 | WT | MIOX | OK |
| AT2G32550 | AT2G32550 | -       | 2:13819378-13822839 | WT | MIOX | OK |
| AT1G78820 | AT1G78820 | -       | 1:29634123-29635813 | WT | MIOX | OK |
| AT3G25010 | AT3G25010 | AtRLP41 | 3:9110102-9112748   | WT | MIOX | OK |
| AT5G43070 | AT5G43070 | WPP1    | 5:17289099-17289776 | WT | MIOX | OK |
| AT1G60390 | AT1G60390 | PG1     | 1:22247473-22249636 | WT | MIOX | OK |
| AT3G18800 | AT3G18800 | -       | 3:6479687-6480378   | WT | MIOX | OK |
| AT2G38310 | AT2G38310 | PYL4    | 2:16050062-16051168 | WT | MIOX | OK |
| AT1G03870 | AT1G03870 | FLA9    | 1:982505-983540     | WT | MIOX | OK |
| AT1G66700 | AT1G66700 | PXMT1   | 1:24873290-24874758 | WT | MIOX | OK |
| AT1G74340 | AT1G74340 | -       | 1:27948122-27951668 | WT | MIOX | OK |
| AT5G40970 | AT5G40970 | -       | 5:16414037-16414504 | WT | MIOX | OK |
| AT5G22788 | AT5G22788 | -       | 5:7602912-7603499   | WT | MIOX | OK |
| AT4G11521 | AT4G11521 | CRK34   | 4:6985564-6986715   | WT | MIOX | OK |
| AT3G25545 | AT3G25545 | -       | 3:9276844-9278629   | WT | MIOX | OK |
| AT3G23730 | AT3G23730 | XTH16   | 3:8550109-8551335   | WT | MIOX | OK |
| AT5G64080 | AT5G64080 | -       | 5:25645262-25646735 | WT | MIOX | OK |
| AT1G10640 | AT1G10640 | -       | 1:3515364-3517888   | WT | MIOX | OK |
| AT2G37380 | AT2G37380 | MAKR3   | 2:15686757-15688003 | WT | MIOX | OK |
| AT3G55990 | AT3G55990 | ESK1    | 3:20780314-20783233 | WT | MIOX | OK |
| AT1G61790 | AT1G61790 | OST3B   | 1:22814389-22815430 | WT | MIOX | OK |
| AT1G09200 | AT1G09200 | HTR2    | 1:2971592-2972199   | WT | MIOX | OK |
| AT5G57770 | AT5G57770 | -       | 5:23400714-23403130 | WT | MIOX | OK |
| AT5G24110 | AT5G24110 | WRKY30  | 5:8153114-8154709   | WT | MIOX | OK |
| AT4G24140 | AT4G24140 | -       | 4:12529874-12533842 | WT | MIOX | OK |
| AT2G38360 | AT2G38360 | PRA1B4  | 2:16069614-16070589 | WT | MIOX | OK |
| AT1G78530 | AT1G78530 | -       | 1:29539088-29540709 | WT | MIOX | OK |
| AT1G63530 | AT1G63530 | -       | 1:23563314-23565555 | WT | MIOX | OK |
| AT2G45470 | AT2G45470 | FLA8    | 2:18742539-18744111 | WT | MIOX | OK |
| AT4G29140 | AT4G29140 | -       | 4:14368918-14370892 | WT | MIOX | OK |



|           |           |         |                     |    |      |    |
|-----------|-----------|---------|---------------------|----|------|----|
| AT1G11735 | AT1G11735 | MIR171B | 1:3961347-3961464   | WT | MIOX | OK |
| AT1G28730 | AT1G28730 | -       | 1:10089897-10089969 | WT | MIOX | OK |
| AT1G61165 | AT1G61165 | -       | 1:22548135-22548243 | WT | MIOX | OK |
| AT1G62935 | AT1G62935 | -       | 1:23308879-23309410 | WT | MIOX | OK |
| AT2G11271 | AT2G11271 | -       | 2:4485413-4485539   | WT | MIOX | OK |
| AT3G18715 | AT3G18715 | IDL4    | 3:6441066-6441348   | WT | MIOX | OK |
| AT3G42090 | AT3G42090 | -       | 3:14274221-14274699 | WT | MIOX | OK |
| AT3G55515 | AT3G55515 | DVL8    | 3:20590922-20591162 | WT | MIOX | OK |
| AT4G34065 | AT4G34065 | -       | 4:16321339-16321489 | WT | MIOX | OK |
| ATCG00370 | ATCG00370 | TRNS.3  | Pt:44826-44913      | WT | MIOX | OK |

| value_1  | value_2   | log2(fold_change) | test_stat | p_value  | q_value     | significant |
|----------|-----------|-------------------|-----------|----------|-------------|-------------|
| 3.81397  | 0.108388  | -5.13702          | -1.99362  | 0.0144   | 0.0407209   | yes         |
| 0.936636 | 0.0577988 | -4.01838          | -2.05684  | 0.0114   | 0.0336359   | yes         |
| 0.925066 | 0.0668557 | -3.79043          | -0.663147 | 0.00975  | 0.0296194   | yes         |
| 1.31891  | 0.107536  | -3.61645          | -1.17741  | 0.0184   | 0.0495451   | yes         |
| 5.06366  | 0.485748  | -3.3819           | -2.21086  | 0.0013   | 0.00548431  | yes         |
| 5.25093  | 0.510644  | -3.36218          | -2.65008  | 0.00575  | 0.0192407   | yes         |
| 2.81768  | 0.291576  | -3.27256          | -2.98704  | 5.00E-05 | 0.000323538 | yes         |
| 4.56495  | 0.485653  | -3.2326           | -2.86641  | 0.0006   | 0.00285599  | yes         |
| 7.10166  | 0.759621  | -3.22481          | -3.17978  | 5.00E-05 | 0.000323538 | yes         |
| 10.0947  | 1.35358   | -2.89875          | -2.44439  | 0.0056   | 0.0188487   | yes         |
| 8.23907  | 1.13163   | -2.86408          | -2.97821  | 5.00E-05 | 0.000323538 | yes         |
| 7.11706  | 0.998835  | -2.83296          | -3.30031  | 5.00E-05 | 0.000323538 | yes         |
| 15.5718  | 2.2014    | -2.82244          | -2.38759  | 0.0003   | 0.00157947  | yes         |
| 29.2156  | 4.44109   | -2.71775          | -5.40079  | 5.00E-05 | 0.000323538 | yes         |
| 9.86272  | 1.57769   | -2.64418          | -4.05234  | 5.00E-05 | 0.000323538 | yes         |
| 8.40579  | 1.35231   | -2.63596          | -3.91349  | 5.00E-05 | 0.000323538 | yes         |
| 16.2784  | 2.65715   | -2.61501          | -3.92649  | 5.00E-05 | 0.000323538 | yes         |
| 3.4252   | 0.562183  | -2.60708          | -2.19403  | 0.0033   | 0.012113    | yes         |
| 29.5007  | 4.89677   | -2.59085          | -5.3375   | 5.00E-05 | 0.000323538 | yes         |
| 1.28475  | 0.22826   | -2.49273          | -3.38461  | 5.00E-05 | 0.000323538 | yes         |
| 16.2965  | 2.98924   | -2.44671          | -4.13668  | 5.00E-05 | 0.000323538 | yes         |
| 53.3137  | 10.0671   | -2.40485          | -5.84292  | 5.00E-05 | 0.000323538 | yes         |
| 1.29782  | 0.246578  | -2.39598          | -1.5517   | 0.00595  | 0.0197802   | yes         |
| 7.60052  | 1.44915   | -2.3909           | -3.90984  | 5.00E-05 | 0.000323538 | yes         |
| 190.274  | 36.4782   | -2.38297          | -7.66981  | 5.00E-05 | 0.000323538 | yes         |
| 3.39435  | 0.656721  | -2.36978          | -2.5286   | 5.00E-05 | 0.000323538 | yes         |
| 2.32093  | 0.450951  | -2.36366          | -3.15239  | 5.00E-05 | 0.000323538 | yes         |
| 20.8938  | 4.1667    | -2.3261           | -2.95407  | 5.00E-05 | 0.000323538 | yes         |
| 8.49932  | 1.78617   | -2.25048          | -3.1873   | 5.00E-05 | 0.000323538 | yes         |
| 6.82423  | 1.4793    | -2.20575          | -2.3151   | 5.00E-05 | 0.000323538 | yes         |
| 35.5863  | 7.72876   | -2.20301          | -3.29003  | 5.00E-05 | 0.000323538 | yes         |
| 74.6208  | 16.4211   | -2.18402          | -2.34168  | 0.00015  | 0.000860006 | yes         |
| 50.164   | 11.0898   | -2.17742          | -4.90314  | 5.00E-05 | 0.000323538 | yes         |
| 92.6817  | 20.7483   | -2.15929          | -1.45897  | 0.0095   | 0.0290473   | yes         |
| 1.6656   | 0.382063  | -2.12416          | -1.72532  | 0.0018   | 0.00722676  | yes         |
| 2.95689  | 0.686022  | -2.10775          | -2.1771   | 5.00E-05 | 0.000323538 | yes         |
| 5.60364  | 1.30235   | -2.10524          | -2.86367  | 5.00E-05 | 0.000323538 | yes         |
| 1.43333  | 0.337899  | -2.08471          | -1.34862  | 0.01085  | 0.0323352   | yes         |
| 8.63805  | 2.07335   | -2.05874          | -2.62876  | 0.0001   | 0.000602691 | yes         |
| 29.1846  | 7.18225   | -2.0227           | -5.19068  | 5.00E-05 | 0.000323538 | yes         |

|          |          |          |          |          |             |     |
|----------|----------|----------|----------|----------|-------------|-----|
| 4.50654  | 1.13631  | -1.98766 | -2.22566 | 0.0011   | 0.004771    | yes |
| 2.74246  | 0.70721  | -1.95526 | -2.23763 | 0.0003   | 0.00157947  | yes |
| 0.936267 | 0.244127 | -1.93929 | -1.46413 | 0.0028   | 0.0105023   | yes |
| 1.94755  | 0.508289 | -1.93794 | -1.25767 | 0.00625  | 0.0206059   | yes |
| 2.00946  | 0.524913 | -1.93666 | -1.38347 | 0.01285  | 0.0370393   | yes |
| 12.1257  | 3.17806  | -1.93185 | -1.90628 | 5.00E-05 | 0.000323538 | yes |
| 1.57166  | 0.414621 | -1.92243 | -2.75122 | 5.00E-05 | 0.000323538 | yes |
| 3.45235  | 0.917311 | -1.9121  | -2.53167 | 5.00E-05 | 0.000323538 | yes |
| 1.21468  | 0.323652 | -1.90806 | -1.7639  | 0.003    | 0.0111387   | yes |
| 0.715141 | 0.192718 | -1.89174 | -1.33496 | 0.01415  | 0.0401376   | yes |
| 370.912  | 100.967  | -1.87719 | -5.19148 | 5.00E-05 | 0.000323538 | yes |
| 4.8212   | 1.33771  | -1.84963 | -1.68331 | 0.00095  | 0.00421906  | yes |
| 4.29959  | 1.19335  | -1.84919 | -1.99166 | 0.00025  | 0.00134358  | yes |
| 4.54604  | 1.2729   | -1.83649 | -4.18231 | 5.00E-05 | 0.000323538 | yes |
| 1.2513   | 0.351263 | -1.83281 | -1.7305  | 0.0007   | 0.00324944  | yes |
| 8.59617  | 2.42334  | -1.8267  | -3.9397  | 5.00E-05 | 0.000323538 | yes |
| 62.5401  | 17.6552  | -1.82469 | -5.36531 | 5.00E-05 | 0.000323538 | yes |
| 250.577  | 70.8148  | -1.82313 | -6.10738 | 5.00E-05 | 0.000323538 | yes |
| 5.2243   | 1.47906  | -1.82055 | -2.74151 | 5.00E-05 | 0.000323538 | yes |
| 22.6591  | 6.48801  | -1.80424 | -2.34744 | 5.00E-05 | 0.000323538 | yes |
| 91.5562  | 26.2318  | -1.80334 | -5.50087 | 5.00E-05 | 0.000323538 | yes |
| 1.1362   | 0.33251  | -1.77275 | -1.53731 | 0.00375  | 0.0134897   | yes |
| 3.15744  | 0.932043 | -1.76029 | -1.89384 | 0.00565  | 0.0189752   | yes |
| 2.70929  | 0.801987 | -1.75626 | -2.49909 | 5.00E-05 | 0.000323538 | yes |
| 2.72976  | 0.813053 | -1.74735 | -1.93759 | 0.0001   | 0.000602691 | yes |
| 3.91088  | 1.16518  | -1.74694 | -2.9037  | 5.00E-05 | 0.000323538 | yes |
| 1.46765  | 0.438677 | -1.74228 | -1.67716 | 0.0008   | 0.00364455  | yes |
| 26.45    | 7.90746  | -1.74198 | -4.38794 | 5.00E-05 | 0.000323538 | yes |
| 9.28632  | 2.78232  | -1.73882 | -2.08364 | 5.00E-05 | 0.000323538 | yes |
| 4.09942  | 1.23652  | -1.72914 | -2.34776 | 5.00E-05 | 0.000323538 | yes |
| 212.042  | 64.173   | -1.72431 | -6.3603  | 5.00E-05 | 0.000323538 | yes |
| 1.04357  | 0.317356 | -1.71736 | -1.30079 | 0.00895  | 0.0276836   | yes |
| 12.4413  | 3.82478  | -1.70169 | -5.32602 | 5.00E-05 | 0.000323538 | yes |
| 5.23087  | 1.61019  | -1.69982 | -3.0462  | 5.00E-05 | 0.000323538 | yes |
| 2.18988  | 0.681636 | -1.68378 | -2.19057 | 5.00E-05 | 0.000323538 | yes |
| 11.027   | 3.43298  | -1.6835  | -1.78013 | 0.00045  | 0.00223165  | yes |
| 1.27727  | 0.398522 | -1.68033 | -1.43431 | 0.00565  | 0.0189752   | yes |
| 44.5396  | 13.9213  | -1.6778  | -3.88288 | 5.00E-05 | 0.000323538 | yes |
| 3.40675  | 1.07069  | -1.66986 | -2.98673 | 5.00E-05 | 0.000323538 | yes |
| 9.93803  | 3.12835  | -1.66756 | -2.31014 | 5.00E-05 | 0.000323538 | yes |
| 2.03704  | 0.641915 | -1.66602 | -1.85259 | 0.0002   | 0.00110793  | yes |

|          |          |          |          |          |             |     |
|----------|----------|----------|----------|----------|-------------|-----|
| 26.2363  | 8.27569  | -1.66461 | -4.84182 | 5.00E-05 | 0.000323538 | yes |
| 2.5722   | 0.813786 | -1.66028 | -1.61539 | 0.00185  | 0.0074      | yes |
| 81.0489  | 25.7583  | -1.65376 | -3.18368 | 5.00E-05 | 0.000323538 | yes |
| 8.58056  | 2.72948  | -1.65245 | -1.87014 | 5.00E-05 | 0.000323538 | yes |
| 0.945038 | 0.301992 | -1.64586 | -1.18902 | 0.00955  | 0.029171    | yes |
| 1.08418  | 0.34718  | -1.64285 | -1.24665 | 0.0086   | 0.0268315   | yes |
| 4.00857  | 1.28385  | -1.64262 | -1.70755 | 0.0011   | 0.004771    | yes |
| 0.8883   | 0.284836 | -1.64092 | -1.43786 | 0.0051   | 0.0174212   | yes |
| 2.93957  | 0.945612 | -1.63629 | -1.23376 | 0.00965  | 0.0293885   | yes |
| 1.18431  | 0.384141 | -1.62434 | -1.95301 | 5.00E-05 | 0.000323538 | yes |
| 0.72328  | 0.235836 | -1.61677 | -1.26274 | 0.00555  | 0.0187078   | yes |
| 24.3772  | 7.99837  | -1.60776 | -2.47579 | 5.00E-05 | 0.000323538 | yes |
| 162.454  | 53.854   | -1.5929  | -1.12962 | 0.01765  | 0.0479474   | yes |
| 1.8291   | 0.607221 | -1.59084 | -1.54923 | 0.00065  | 0.00304972  | yes |
| 2.51376  | 0.835158 | -1.58972 | -2.17296 | 5.00E-05 | 0.000323538 | yes |
| 8.56749  | 2.85535  | -1.58521 | -2.21512 | 5.00E-05 | 0.000323538 | yes |
| 10.6266  | 3.54197  | -1.58505 | -2.01437 | 5.00E-05 | 0.000323538 | yes |
| 1.39157  | 0.46763  | -1.57327 | -1.23366 | 0.0102   | 0.030707    | yes |
| 14.8928  | 5.0413   | -1.56275 | -2.77898 | 5.00E-05 | 0.000323538 | yes |
| 0.743905 | 0.252215 | -1.56047 | -1.33949 | 0.00765  | 0.0243897   | yes |
| 31.7005  | 10.7491  | -1.56029 | -1.83089 | 0.00915  | 0.02816     | yes |
| 1.45121  | 0.494125 | -1.55431 | -1.19377 | 0.01245  | 0.036153    | yes |
| 2.41952  | 0.825379 | -1.55159 | -1.21985 | 0.01505  | 0.0420987   | yes |
| 13.1823  | 4.4982   | -1.55118 | -2.31256 | 5.00E-05 | 0.000323538 | yes |
| 0.842858 | 0.287864 | -1.5499  | -1.28784 | 0.0101   | 0.0304809   | yes |
| 1.40896  | 0.486214 | -1.53496 | -1.85469 | 5.00E-05 | 0.000323538 | yes |
| 13.8999  | 4.80649  | -1.53201 | -2.73186 | 5.00E-05 | 0.000323538 | yes |
| 121.445  | 42.1494  | -1.52672 | -3.05671 | 0.00245  | 0.00942039  | yes |
| 5.0139   | 1.74676  | -1.52125 | -1.51949 | 0.0006   | 0.00285599  | yes |
| 1.42297  | 0.496561 | -1.51886 | -1.45683 | 0.00335  | 0.0122695   | yes |
| 1.28861  | 0.450233 | -1.51707 | -1.75436 | 0.00015  | 0.000860006 | yes |
| 1.06443  | 0.373041 | -1.51267 | -1.40899 | 0.0122   | 0.0355395   | yes |
| 1.67289  | 0.587379 | -1.50998 | -1.58783 | 0.00105  | 0.00459538  | yes |
| 1.48215  | 0.521153 | -1.50791 | -2.35035 | 5.00E-05 | 0.000323538 | yes |
| 26.5166  | 9.36859  | -1.50099 | -3.96177 | 5.00E-05 | 0.000323538 | yes |
| 66.4357  | 23.587   | -1.49396 | -4.49447 | 5.00E-05 | 0.000323538 | yes |
| 3.72473  | 1.32401  | -1.49222 | -1.17906 | 0.009    | 0.0277962   | yes |
| 1.24569  | 0.443347 | -1.49044 | -2.35583 | 5.00E-05 | 0.000323538 | yes |
| 0.720888 | 0.256977 | -1.48814 | -1.24573 | 0.00755  | 0.0241337   | yes |
| 19.9381  | 7.10906  | -1.48779 | -2.64818 | 5.00E-05 | 0.000323538 | yes |
| 5.19947  | 1.85432  | -1.48748 | -2.28806 | 5.00E-05 | 0.000323538 | yes |

|          |          |          |          |          |             |     |
|----------|----------|----------|----------|----------|-------------|-----|
| 1.9764   | 0.70628  | -1.48456 | -1.43369 | 0.00455  | 0.01584     | yes |
| 1.17041  | 0.418506 | -1.4837  | -2.01262 | 0.0002   | 0.00110793  | yes |
| 4.31481  | 1.54673  | -1.48008 | -1.68865 | 5.00E-05 | 0.000323538 | yes |
| 0.695171 | 0.250454 | -1.47282 | -1.27977 | 0.0169   | 0.046259    | yes |
| 0.893468 | 0.32213  | -1.47178 | -1.43282 | 0.0029   | 0.0108309   | yes |
| 1.41177  | 0.511242 | -1.46543 | -1.5176  | 0.00105  | 0.00459538  | yes |
| 7.79032  | 2.82472  | -1.46358 | -2.52545 | 5.00E-05 | 0.000323538 | yes |
| 0.705815 | 0.256603 | -1.45975 | -1.1373  | 0.01195  | 0.0349665   | yes |
| 0.977928 | 0.356326 | -1.45653 | -1.44766 | 0.0034   | 0.012418    | yes |
| 50.7405  | 18.5457  | -1.45206 | -3.34662 | 5.00E-05 | 0.000323538 | yes |
| 2.68583  | 0.98937  | -1.44079 | -2.01229 | 5.00E-05 | 0.000323538 | yes |
| 1.59556  | 0.593341 | -1.42713 | -1.33778 | 0.0021   | 0.00824731  | yes |
| 10.1122  | 3.76236  | -1.42639 | -2.04304 | 0.00015  | 0.000860006 | yes |
| 4.18646  | 1.56796  | -1.41684 | -1.96081 | 5.00E-05 | 0.000323538 | yes |
| 6.02873  | 2.26973  | -1.40933 | -2.03032 | 5.00E-05 | 0.000323538 | yes |
| 25.3565  | 9.56034  | -1.40722 | -2.59914 | 5.00E-05 | 0.000323538 | yes |
| 15.8285  | 6.00288  | -1.3988  | -2.44301 | 5.00E-05 | 0.000323538 | yes |
| 1.716    | 0.652498 | -1.39501 | -1.38165 | 0.00225  | 0.00875217  | yes |
| 2.68473  | 1.02169  | -1.39381 | -1.04376 | 0.01595  | 0.0441456   | yes |
| 15.9754  | 6.10426  | -1.38797 | -2.78131 | 5.00E-05 | 0.000323538 | yes |
| 1.04406  | 0.399138 | -1.38725 | -1.37005 | 0.0014   | 0.00584309  | yes |
| 0.671549 | 0.256749 | -1.38714 | -1.3874  | 0.00535  | 0.0181503   | yes |
| 603.647  | 231.118  | -1.38508 | -4.84914 | 5.00E-05 | 0.000323538 | yes |
| 0.790545 | 0.303879 | -1.37935 | -1.76111 | 0.00035  | 0.00180697  | yes |
| 0.824029 | 0.316925 | -1.37855 | -1.52041 | 0.0018   | 0.00722676  | yes |
| 1.59448  | 0.613868 | -1.37709 | -1.57041 | 0.00065  | 0.00304972  | yes |
| 0.788724 | 0.304083 | -1.37506 | -1.30189 | 0.00275  | 0.0103401   | yes |
| 0.88195  | 0.340102 | -1.37473 | -1.22892 | 0.0154   | 0.0428818   | yes |
| 2.87383  | 1.10863  | -1.3742  | -1.62482 | 0.00055  | 0.00265935  | yes |
| 10.4075  | 4.02216  | -1.37158 | -2.52753 | 5.00E-05 | 0.000323538 | yes |
| 5.51153  | 2.13822  | -1.36604 | -2.77737 | 5.00E-05 | 0.000323538 | yes |
| 3.36518  | 1.30691  | -1.36453 | -2.58938 | 5.00E-05 | 0.000323538 | yes |
| 5.67324  | 2.20454  | -1.3637  | -3.16995 | 5.00E-05 | 0.000323538 | yes |
| 2.39093  | 0.930515 | -1.36147 | -1.33477 | 0.00275  | 0.0103401   | yes |
| 648.552  | 252.668  | -1.35998 | -1.91582 | 0.00025  | 0.00134358  | yes |
| 53.5446  | 20.8675  | -1.35948 | -3.43593 | 5.00E-05 | 0.000323538 | yes |
| 8.5052   | 3.32374  | -1.35554 | -3.02415 | 5.00E-05 | 0.000323538 | yes |
| 6.78847  | 2.6564   | -1.35362 | -2.45886 | 5.00E-05 | 0.000323538 | yes |
| 13.363   | 5.2399   | -1.35063 | -3.50776 | 5.00E-05 | 0.000323538 | yes |
| 5.20977  | 2.04293  | -1.35058 | -2.46795 | 5.00E-05 | 0.000323538 | yes |
| 11.8737  | 4.66344  | -1.3483  | -2.6306  | 5.00E-05 | 0.000323538 | yes |

|          |          |          |          |          |             |     |
|----------|----------|----------|----------|----------|-------------|-----|
| 38.1821  | 15.0955  | -1.33878 | -1.92842 | 0.0001   | 0.000602691 | yes |
| 41.8576  | 16.5735  | -1.33661 | -3.98527 | 5.00E-05 | 0.000323538 | yes |
| 17.7092  | 7.01214  | -1.33658 | -2.59242 | 5.00E-05 | 0.000323538 | yes |
| 1.9876   | 0.788483 | -1.33388 | -2.06085 | 5.00E-05 | 0.000323538 | yes |
| 5.01545  | 1.99493  | -1.33004 | -2.30168 | 5.00E-05 | 0.000323538 | yes |
| 6.90251  | 2.74871  | -1.32837 | -2.18308 | 5.00E-05 | 0.000323538 | yes |
| 11.6256  | 4.63149  | -1.32776 | -2.93989 | 5.00E-05 | 0.000323538 | yes |
| 0.999685 | 0.398955 | -1.32525 | -1.57258 | 0.00045  | 0.00223165  | yes |
| 7.87565  | 3.14361  | -1.32498 | -1.61029 | 0.0004   | 0.00202805  | yes |
| 2.24291  | 0.895921 | -1.32393 | -1.67046 | 0.00045  | 0.00223165  | yes |
| 4.90404  | 1.95964  | -1.32338 | -1.61272 | 0.0012   | 0.00513439  | yes |
| 1.19948  | 0.48039  | -1.32013 | -1.79515 | 0.0002   | 0.00110793  | yes |
| 8.39715  | 3.36959  | -1.31733 | -2.51664 | 5.00E-05 | 0.000323538 | yes |
| 1.7051   | 0.686769 | -1.31196 | -1.24238 | 0.01045  | 0.0313261   | yes |
| 156.406  | 63.0289  | -1.31121 | -4.79378 | 5.00E-05 | 0.000323538 | yes |
| 91.3536  | 36.9589  | -1.30554 | -3.88642 | 5.00E-05 | 0.000323538 | yes |
| 7.76461  | 3.14724  | -1.30283 | -2.9352  | 5.00E-05 | 0.000323538 | yes |
| 17.3511  | 7.04049  | -1.30128 | -3.0781  | 5.00E-05 | 0.000323538 | yes |
| 1.62392  | 0.658979 | -1.30118 | -1.68188 | 0.00015  | 0.000860006 | yes |
| 8.10169  | 3.29768  | -1.29677 | -1.62264 | 5.00E-05 | 0.000323538 | yes |
| 15.6055  | 6.37045  | -1.29259 | -1.81363 | 5.00E-05 | 0.000323538 | yes |
| 86.3794  | 35.3095  | -1.29063 | -3.67396 | 5.00E-05 | 0.000323538 | yes |
| 22.433   | 9.1709   | -1.29049 | -3.55042 | 5.00E-05 | 0.000323538 | yes |
| 2.75022  | 1.12838  | -1.28529 | -1.70504 | 0.00015  | 0.000860006 | yes |
| 3.28813  | 1.34961  | -1.28473 | -1.68083 | 0.00015  | 0.000860006 | yes |
| 1.18328  | 0.485797 | -1.28437 | -1.26037 | 0.00445  | 0.0155509   | yes |
| 1.18105  | 0.484962 | -1.28413 | -1.09147 | 0.0081   | 0.0255538   | yes |
| 2.51376  | 1.03319  | -1.28274 | -2.50622 | 5.00E-05 | 0.000323538 | yes |
| 5.74946  | 2.36494  | -1.28162 | -1.49732 | 0.00615  | 0.0203127   | yes |
| 1.93264  | 0.795549 | -1.28055 | -1.50101 | 0.00055  | 0.00265935  | yes |
| 2.66097  | 1.09698  | -1.27841 | -1.12604 | 0.0118   | 0.0345937   | yes |
| 4.84479  | 1.99971  | -1.27664 | -1.17504 | 0.0125   | 0.0362524   | yes |
| 3.49231  | 1.44173  | -1.27638 | -1.58944 | 0.00295  | 0.0109775   | yes |
| 3.35713  | 1.3921   | -1.26997 | -1.4864  | 0.0011   | 0.004771    | yes |
| 350.166  | 145.32   | -1.2688  | -4.02425 | 5.00E-05 | 0.000323538 | yes |
| 5.08845  | 2.11643  | -1.26559 | -2.48427 | 5.00E-05 | 0.000323538 | yes |
| 1.01129  | 0.420992 | -1.26433 | -1.16772 | 0.00555  | 0.0187078   | yes |
| 8.29757  | 3.47804  | -1.25441 | -1.99982 | 5.00E-05 | 0.000323538 | yes |
| 12.8739  | 5.40043  | -1.25331 | -3.26961 | 5.00E-05 | 0.000323538 | yes |
| 187.017  | 78.5291  | -1.25187 | -3.90338 | 5.00E-05 | 0.000323538 | yes |
| 8.26687  | 3.47129  | -1.25187 | -3.10863 | 5.00E-05 | 0.000323538 | yes |

|          |          |          |          |          |             |     |
|----------|----------|----------|----------|----------|-------------|-----|
| 4.76806  | 2.00591  | -1.24915 | -2.33123 | 0.00035  | 0.00180697  | yes |
| 3.75976  | 1.58239  | -1.24854 | -1.90784 | 0.00025  | 0.00134358  | yes |
| 4.24496  | 1.78739  | -1.2479  | -1.51714 | 0.0003   | 0.00157947  | yes |
| 2.67291  | 1.12742  | -1.24538 | -1.46902 | 0.0011   | 0.004771    | yes |
| 1.05261  | 0.446886 | -1.236   | -1.43868 | 0.00095  | 0.00421906  | yes |
| 1973.74  | 838.772  | -1.23458 | -4.77475 | 5.00E-05 | 0.000323538 | yes |
| 1.03885  | 0.442307 | -1.23187 | -1.21271 | 0.00405  | 0.0143829   | yes |
| 0.843616 | 0.360141 | -1.22802 | -1.23032 | 0.00975  | 0.0296194   | yes |
| 2.95898  | 1.26433  | -1.22673 | -1.30964 | 0.00185  | 0.0074      | yes |
| 4.96523  | 2.12699  | -1.22305 | -2.23611 | 5.00E-05 | 0.000323538 | yes |
| 0.761165 | 0.326621 | -1.22059 | -1.06894 | 0.0124   | 0.0360306   | yes |
| 3.69667  | 1.58757  | -1.21941 | -1.88325 | 0.0001   | 0.000602691 | yes |
| 2.76098  | 1.18576  | -1.21937 | -1.60819 | 0.00025  | 0.00134358  | yes |
| 1.87023  | 0.804989 | -1.21617 | -1.20489 | 0.00565  | 0.0189752   | yes |
| 2.89086  | 1.24462  | -1.21579 | -1.44047 | 0.0027   | 0.0101896   | yes |
| 8.40722  | 3.63825  | -1.20838 | -2.38537 | 5.00E-05 | 0.000323538 | yes |
| 43.5073  | 18.832   | -1.20807 | -3.87542 | 5.00E-05 | 0.000323538 | yes |
| 4.49581  | 1.94749  | -1.20696 | -2.44304 | 5.00E-05 | 0.000323538 | yes |
| 13.5324  | 5.88018  | -1.20249 | -2.94551 | 5.00E-05 | 0.000323538 | yes |
| 2.25794  | 0.982033 | -1.20116 | -1.81529 | 0.0001   | 0.000602691 | yes |
| 58.4294  | 25.4217  | -1.20064 | -1.60815 | 0.00065  | 0.00304972  | yes |
| 19.4343  | 8.48429  | -1.19574 | -2.08522 | 5.00E-05 | 0.000323538 | yes |
| 0.752563 | 0.330868 | -1.18555 | -1.32179 | 0.00375  | 0.0134897   | yes |
| 85.1     | 37.4593  | -1.18384 | -1.72064 | 5.00E-05 | 0.000323538 | yes |
| 3.04053  | 1.34324  | -1.1786  | -2.6763  | 5.00E-05 | 0.000323538 | yes |
| 40.688   | 17.9916  | -1.17728 | -3.57805 | 5.00E-05 | 0.000323538 | yes |
| 2.52169  | 1.11509  | -1.17723 | -1.92075 | 5.00E-05 | 0.000323538 | yes |
| 0.943185 | 0.418548 | -1.17215 | -1.10554 | 0.0145   | 0.0409281   | yes |
| 1.83808  | 0.817583 | -1.16876 | -1.43534 | 0.0012   | 0.00513439  | yes |
| 2.61071  | 1.16253  | -1.16717 | -1.65709 | 0.0004   | 0.00202805  | yes |
| 1.30518  | 0.582603 | -1.16366 | -1.25037 | 0.01305  | 0.0375157   | yes |
| 17.6786  | 7.89216  | -1.16351 | -1.55492 | 5.00E-05 | 0.000323538 | yes |
| 3.85594  | 1.72201  | -1.16299 | -1.79018 | 5.00E-05 | 0.000323538 | yes |
| 3.54399  | 1.58411  | -1.1617  | -1.205   | 0.00375  | 0.0134897   | yes |
| 4.25567  | 1.90336  | -1.16083 | -1.27999 | 0.0053   | 0.0180106   | yes |
| 36.4822  | 16.337   | -1.15905 | -3.71189 | 5.00E-05 | 0.000323538 | yes |
| 2.89351  | 1.29611  | -1.15863 | -1.14476 | 0.0093   | 0.0285498   | yes |
| 129.143  | 57.8621  | -1.15828 | -2.21449 | 5.00E-05 | 0.000323538 | yes |
| 15.2621  | 6.85306  | -1.15513 | -1.99805 | 5.00E-05 | 0.000323538 | yes |
| 0.721327 | 0.325396 | -1.14846 | -1.22918 | 0.0164   | 0.0451867   | yes |
| 42.7591  | 19.2916  | -1.14826 | -3.11557 | 5.00E-05 | 0.000323538 | yes |

|         |          |          |          |          |             |     |
|---------|----------|----------|----------|----------|-------------|-----|
| 1.00965 | 0.457245 | -1.14282 | -1.12102 | 0.0159   | 0.0440271   | yes |
| 2.3182  | 1.05289  | -1.13865 | -1.79419 | 0.00045  | 0.00223165  | yes |
| 11.8559 | 5.38739  | -1.13795 | -1.23441 | 0.0051   | 0.0174212   | yes |
| 1.59392 | 0.724316 | -1.13789 | -1.28378 | 0.0013   | 0.00548431  | yes |
| 949.734 | 432.281  | -1.13556 | -3.5342  | 5.00E-05 | 0.000323538 | yes |
| 1.19176 | 0.542813 | -1.13457 | -1.09409 | 0.00835  | 0.0262029   | yes |
| 8.53399 | 3.89098  | -1.13309 | -1.43819 | 0.00185  | 0.0074      | yes |
| 2.47034 | 1.12761  | -1.13144 | -1.53788 | 0.0006   | 0.00285599  | yes |
| 2.42522 | 1.10759  | -1.13069 | -2.08843 | 5.00E-05 | 0.000323538 | yes |
| 2.80076 | 1.27978  | -1.12992 | -1.40453 | 0.00145  | 0.0060203   | yes |
| 2.25874 | 1.03498  | -1.12591 | -2.27332 | 5.00E-05 | 0.000323538 | yes |
| 34.8421 | 15.9708  | -1.12539 | -3.28486 | 5.00E-05 | 0.000323538 | yes |
| 6.80895 | 3.12654  | -1.12287 | -1.72783 | 0.0003   | 0.00157947  | yes |
| 142.754 | 65.5673  | -1.12249 | -3.581   | 5.00E-05 | 0.000323538 | yes |
| 17.1863 | 7.90612  | -1.12022 | -2.64554 | 5.00E-05 | 0.000323538 | yes |
| 1.708   | 0.788146 | -1.11577 | -1.53207 | 0.0009   | 0.00404197  | yes |
| 59.5549 | 27.5287  | -1.11328 | -2.7014  | 5.00E-05 | 0.000323538 | yes |
| 1.06253 | 0.491815 | -1.11131 | -1.15053 | 0.0101   | 0.0304809   | yes |
| 11.2192 | 5.19617  | -1.11045 | -1.09797 | 0.0127   | 0.0366876   | yes |
| 36.2596 | 16.7952  | -1.11031 | -2.81241 | 5.00E-05 | 0.000323538 | yes |
| 214.653 | 99.4485  | -1.10998 | -3.81347 | 5.00E-05 | 0.000323538 | yes |
| 94.1037 | 43.6901  | -1.10695 | -3.46627 | 5.00E-05 | 0.000323538 | yes |
| 1.11926 | 0.520282 | -1.10517 | -1.56622 | 0.0009   | 0.00404197  | yes |
| 1.25655 | 0.584383 | -1.10448 | -1.68091 | 0.0005   | 0.00244658  | yes |
| 2.06926 | 0.96358  | -1.10264 | -1.37559 | 0.0025   | 0.00955264  | yes |
| 59.3435 | 27.6379  | -1.10244 | -3.44958 | 5.00E-05 | 0.000323538 | yes |
| 66.3423 | 30.9058  | -1.10205 | -3.59443 | 5.00E-05 | 0.000323538 | yes |
| 1.67774 | 0.781712 | -1.10181 | -1.23294 | 0.0036   | 0.0130421   | yes |
| 29.5788 | 13.8121  | -1.09863 | -3.14376 | 5.00E-05 | 0.000323538 | yes |
| 7.72213 | 3.60665  | -1.09834 | -2.1074  | 5.00E-05 | 0.000323538 | yes |
| 289.117 | 135.503  | -1.09333 | -3.75157 | 5.00E-05 | 0.000323538 | yes |
| 18.274  | 8.60586  | -1.0864  | -1.73469 | 5.00E-05 | 0.000323538 | yes |
| 13.9718 | 6.57998  | -1.08636 | -3.20615 | 5.00E-05 | 0.000323538 | yes |
| 8.48055 | 3.99401  | -1.08632 | -2.51151 | 5.00E-05 | 0.000323538 | yes |
| 5.787   | 2.7276   | -1.08518 | -2.4575  | 5.00E-05 | 0.000323538 | yes |
| 2.62563 | 1.23922  | -1.08323 | -1.02889 | 0.01465  | 0.0412563   | yes |
| 2.51885 | 1.19064  | -1.08103 | -1.25877 | 0.0038   | 0.0136322   | yes |
| 87.7016 | 41.48    | -1.08019 | -3.69652 | 5.00E-05 | 0.000323538 | yes |
| 3.3679  | 1.59448  | -1.07876 | -1.19759 | 0.01205  | 0.0351862   | yes |
| 2.7637  | 1.31038  | -1.07662 | -1.07053 | 0.0106   | 0.031724    | yes |
| 240.194 | 113.906  | -1.07635 | -2.05765 | 5.00E-05 | 0.000323538 | yes |



|          |          |          |          |          |             |     |
|----------|----------|----------|----------|----------|-------------|-----|
| 3.27839  | 1.55576  | -1.07537 | -1.49413 | 0.00075  | 0.00344842  | yes |
| 12.8401  | 6.09878  | -1.07406 | -1.55262 | 0.0008   | 0.00364455  | yes |
| 11.0699  | 5.26564  | -1.07196 | -1.3395  | 0.00375  | 0.0134897   | yes |
| 150.746  | 71.7229  | -1.07162 | -3.95924 | 5.00E-05 | 0.000323538 | yes |
| 1.84443  | 0.877983 | -1.07091 | -1.66629 | 0.0001   | 0.000602691 | yes |
| 207.405  | 98.8035  | -1.06982 | -3.80547 | 5.00E-05 | 0.000323538 | yes |
| 1.7396   | 0.830104 | -1.06739 | -1.26785 | 0.0036   | 0.0130421   | yes |
| 2.97383  | 1.41917  | -1.06727 | -1.7781  | 0.0001   | 0.000602691 | yes |
| 41.5173  | 19.8803  | -1.06237 | -2.69954 | 5.00E-05 | 0.000323538 | yes |
| 2.08231  | 0.998672 | -1.06011 | -1.39738 | 0.00165  | 0.00672003  | yes |
| 4.20359  | 2.02069  | -1.05677 | -1.91939 | 5.00E-05 | 0.000323538 | yes |
| 9.77462  | 4.7039   | -1.05518 | -2.05163 | 5.00E-05 | 0.000323538 | yes |
| 5.92966  | 2.85987  | -1.052   | -1.88087 | 5.00E-05 | 0.000323538 | yes |
| 41.2681  | 19.9102  | -1.05151 | -3.34622 | 5.00E-05 | 0.000323538 | yes |
| 10.7203  | 5.19996  | -1.04377 | -2.86125 | 5.00E-05 | 0.000323538 | yes |
| 18.1943  | 8.84055  | -1.04128 | -2.09731 | 5.00E-05 | 0.000323538 | yes |
| 0.970408 | 0.471902 | -1.0401  | -1.31256 | 0.0056   | 0.0188487   | yes |
| 41.3668  | 20.1549  | -1.03734 | -2.56293 | 5.00E-05 | 0.000323538 | yes |
| 206.518  | 100.651  | -1.03691 | -3.5768  | 5.00E-05 | 0.000323538 | yes |
| 140.943  | 68.725   | -1.03621 | -3.52102 | 5.00E-05 | 0.000323538 | yes |
| 1.00823  | 0.492522 | -1.03356 | -1.15406 | 0.01415  | 0.0401376   | yes |
| 155.857  | 76.1733  | -1.03287 | -3.23151 | 5.00E-05 | 0.000323538 | yes |
| 74.4899  | 36.4294  | -1.03194 | -2.63381 | 5.00E-05 | 0.000323538 | yes |
| 4.37531  | 2.14142  | -1.03082 | -1.14645 | 0.0094   | 0.0287847   | yes |
| 11.7823  | 5.76881  | -1.03028 | -2.30545 | 5.00E-05 | 0.000323538 | yes |
| 17.2137  | 8.47385  | -1.02247 | -2.67099 | 5.00E-05 | 0.000323538 | yes |
| 16.9975  | 8.37373  | -1.02138 | -2.55948 | 5.00E-05 | 0.000323538 | yes |
| 16.9227  | 8.34532  | -1.01992 | -1.98095 | 5.00E-05 | 0.000323538 | yes |
| 2.89053  | 1.42725  | -1.01809 | -1.91806 | 5.00E-05 | 0.000323538 | yes |
| 2.26594  | 1.12155  | -1.01462 | -1.24964 | 0.00415  | 0.0146756   | yes |
| 1.97393  | 0.978617 | -1.01225 | -1.65575 | 0.00035  | 0.00180697  | yes |
| 161.34   | 80.1195  | -1.00988 | -3.52417 | 5.00E-05 | 0.000323538 | yes |
| 75.4624  | 37.4806  | -1.00961 | -2.75152 | 5.00E-05 | 0.000323538 | yes |
| 1.55231  | 0.771017 | -1.00958 | -1.15558 | 0.01035  | 0.0310771   | yes |
| 11.4501  | 5.69095  | -1.00862 | -2.55116 | 5.00E-05 | 0.000323538 | yes |
| 1.81113  | 0.900197 | -1.00858 | -1.47402 | 0.00125  | 0.00531489  | yes |
| 28.1155  | 14.0012  | -1.00582 | -2.55282 | 5.00E-05 | 0.000323538 | yes |
| 2.33978  | 1.16565  | -1.00524 | -1.5674  | 0.0011   | 0.004771    | yes |
| 1.05036  | 0.523824 | -1.00373 | -1.04588 | 0.01265  | 0.0365834   | yes |
| 202.948  | 101.264  | -1.00299 | -3.16788 | 5.00E-05 | 0.000323538 | yes |
| 3.07999  | 1.53735  | -1.00247 | -1.67601 | 0.0001   | 0.000602691 | yes |

|         |   |        |        |          |             |     |
|---------|---|--------|--------|----------|-------------|-----|
| 12.4586 | 0 | #NAME? | #NAME? | 0.0033   | 0.012113    | yes |
| 361.306 | 0 | #NAME? | #NAME? | 0.00055  | 0.00265935  | yes |
| 15.9788 | 0 | #NAME? | #NAME? | 0.0096   | 0.0292896   | yes |
| 1.00916 | 0 | #NAME? | #NAME? | 5.00E-05 | 0.000323538 | yes |
| 18.4683 | 0 | #NAME? | #NAME? | 0.0032   | 0.0117954   | yes |
| 2.90986 | 0 | #NAME? | #NAME? | 5.00E-05 | 0.000323538 | yes |
| 37.3513 | 0 | #NAME? | #NAME? | 0.00495  | 0.0169815   | yes |
| 1.67152 | 0 | #NAME? | #NAME? | 5.00E-05 | 0.000323538 | yes |
| 6.79315 | 0 | #NAME? | #NAME? | 0.00065  | 0.00304972  | yes |
| 48.3556 | 0 | #NAME? | #NAME? | 0.00745  | 0.0238639   | yes |
