# Supplementary material for: Mechanisms underlying the enhanced biomass and abiotic stress tolerance phenotype of an Arabidopsis MIOX over‐expresser
Source: PubMed Central journal article supplement — Plant Direct. 2019 Sep 2;3(9):e00165. doi: 10.1002/pld3.165 (PMC6718051; doi:10.1002/pld3.165), 2019-09-02
Supplement: PLD3-3-e00165-s004.pdf [file PLD3-3-e00165-s004.pdf]

## 31.2 cell.division

### **Biotic stress**

| BinCode | BinName                   |
|---------|---------------------------|
| 20.1    | stress.biotic             |
| 20.1.2  | stress.biotic.receptors   |
| 20.1.7  | stress.biotic.PR-proteins |
| 20.1.7  | stress.biotic.PR-proteins |

### **Heat Stress \_MapMan**

| BinCode | BinName             |
|---------|---------------------|
| 20.2.1  | stress.abiotic.heat |

### **Cell cycle transcripts**

| BinCode | BinName    |
|---------|------------|
| 31.3    | cell.cycle |







29.4 protein.postranslational modification  
29.4 protein.postranslational modification

## Regulation

| BinCode  | BinName                                                                |
|----------|------------------------------------------------------------------------|
|          | 30.1 signalling.in sugar and nutrient physiology                       |
|          | 30.1 signalling.in sugar and nutrient physiology                       |
| 30.2.3   | signalling.receptor kinases.leucine rich repeat III                    |
| 30.2.8.2 | signalling.receptor kinases.leucine rich repeat VIII.VIII-2            |
| 30.2.11  | signalling.receptor kinases.leucine rich repeat XI                     |
| 30.2.13  | signalling.receptor kinases.leucine rich repeat XIII                   |
| 30.2.17  | signalling.receptor kinases.DUF 26                                     |
| 30.2.23  | signalling.receptor kinases.RKF3 like                                  |
| 30.2.25  | signalling.receptor kinases.wall associated kinase                     |
| 30.2.99  | signalling.receptor kinases.misc                                       |
|          | 30.3 signalling.calcium                                                |
| 30.4.1   | signalling.phosphoinositides.phosphatidylinositol-4-phosphate 5-kinase |
|          | 30.5 signalling.G-proteins                                             |
|          | 30.6 signalling.MAP kinases                                            |
|          | 30.11 signalling.light                                                 |
|          | 30.11 signalling.light                                                 |

## RNA Processing







- 27.3.26 RNA.regulation of transcription.MYB-related transcription factor family
- 27.3.27 RNA.regulation of transcription.NAC domain transcription factor family
- 27.3.27 RNA.regulation of transcription.NAC domain transcription factor family
- 27.3.29 RNA.regulation of transcription.TCP transcription factor family
- 27.3.30 RNA.regulation of transcription.Trihelix, Triple-Helix transcription factor fan
- 27.3.30 RNA.regulation of transcription.Trihelix, Triple-Helix transcription factor fan
- 27.3.30 RNA.regulation of transcription.Trihelix, Triple-Helix transcription factor fan
- 27.3.30 RNA.regulation of transcription.Trihelix, Triple-Helix transcription factor fan
- 27.3.30 RNA.regulation of transcription.Trihelix, Triple-Helix transcription factor fan
- 27.3.30 RNA.regulation of transcription.Trihelix, Triple-Helix transcription factor fan
- 27.3.30 RNA.regulation of transcription.Trihelix, Triple-Helix transcription factor fan
- 27.3.30 RNA.regulation of transcription.Trihelix, Triple-Helix transcription factor fan
- 27.3.30 RNA.regulation of transcription.Trihelix, Triple-Helix transcription factor fan
- 27.3.30 RNA.regulation of transcription.Trihelix, Triple-Helix transcription factor fan
- 27.3.30 RNA.regulation of transcription.Trihelix, Triple-Helix transcription factor fan
- 27.3.32 RNA.regulation of transcription.WRKY domain transcription factor family
- 27.3.32 RNA.regulation of transcription.WRKY domain transcription factor family
- 27.3.32 RNA.regulation of transcription.WRKY domain transcription factor family
- 27.3.32 RNA.regulation of transcription.WRKY domain transcription factor family
- 27.3.32 RNA.regulation of transcription.WRKY domain transcription factor family
- 27.3.32 RNA.regulation of transcription.WRKY domain transcription factor family
- 27.3.35 RNA.regulation of transcription.bZIP transcription factor family
- 27.3.35 RNA.regulation of transcription.bZIP transcription factor family
- 27.3.37 RNA.regulation of transcription.AS2,Lateral Organ Boundaries Gene Family
- 27.3.47 RNA.regulation of transcription.ELF3
- 27.3.51 RNA.regulation of transcription.General Transcription, TBP-binding protein
- 27.3.55 RNA.regulation of transcription.HDA
- 27.3.59 RNA.regulation of transcription.Methyl binding domain proteins
- 27.3.59 RNA.regulation of transcription.Methyl binding domain proteins
- 27.3.60 RNA.regulation of transcription.NIN-like bZIP-related family
- 27.3.64 RNA.regulation of transcription.PHOR1
- 27.3.67 RNA.regulation of transcription.putative transcription regulator
- 27.3.67 RNA.regulation of transcription.putative transcription regulator

### Unkown Proteins

| BinCode | BinName              |
|---------|----------------------|
| 35.2    | not assigned.unknown |



















## Redox\_Trascripts

| BinCode | BinName                                   |
|---------|-------------------------------------------|
|         | 21.2 redox.ascorbate and glutathione      |
|         | 21.2 redox.ascorbate and glutathione      |
|         | 21.2 redox.ascorbate and glutathione      |
| 21.2.1  | redox.ascorbate and glutathione.ascorbate |
| 21.2.1  | redox.ascorbate and glutathione.ascorbate |
| 21.2.1  | redox.ascorbate and glutathione.ascorbate |
|         | 21.4 redox.glutaredoxins                  |

## Metal associated transcripts

| BinCode | BinName                                            |
|---------|----------------------------------------------------|
|         | 15.2 metal handling.binding, chelation and storage |
|         | 15.3 metal handling.regulation                     |
|         | 15.1 metal handling.acquisition                    |
|         | 15.2 metal handling.binding, chelation and storage |
|         | 15.2 metal handling.binding, chelation and storage |
|         | 15.2 metal handling.binding, chelation and storage |
|         | 15.2 metal handling.binding, chelation and storage |
|         | 15.2 metal handling.binding, chelation and storage |

## Transport transcripts

| BinCode | BinName                              |
|---------|--------------------------------------|
|         | 34 transport                         |
| 34.1.3  | transport.p- and v-ATPases.inhibitor |
|         | 34.2 transport.sugars                |
|         | 34.2 transport.sugars                |
|         | 34.2 transport.sugars                |
|         | 34.3 transport.amino acids           |
|         | 34.3 transport.amino acids           |



|          |                                       |
|----------|---------------------------------------|
| 10.5.1.1 | cell wall.cell wall proteins.AGPs.AGP |

### Cell wall\_cellulose synthesis

| BinCode | BinName                                          |
|---------|--------------------------------------------------|
|         | 10.2 cell wall.cellulose synthesis               |
|         | 10.2 cell wall.cellulose synthesis               |
|         | 10.2 cell wall.cellulose synthesis               |
| 10.2.1  | cell wall.cellulose synthesis.cellulose synthase |
| 10.2.1  | cell wall.cellulose synthesis.cellulose synthase |

### Cell wall\_Polygalactouran Synthesis

| BinCode | BinName                                                     |
|---------|-------------------------------------------------------------|
| 10.6.3  | cell wall.degradation.pectate lyases and polygalacturonases |
| 10.6.3  | cell wall.degradation.pectate lyases and polygalacturonases |
| 10.6.3  | cell wall.degradation.pectate lyases and polygalacturonases |
| 10.6.3  | cell wall.degradation.pectate lyases and polygalacturonases |
| 10.6.3  | cell wall.degradation.pectate lyases and polygalacturonases |
| 10.6.3  | cell wall.degradation.pectate lyases and polygalacturonases |

### Cell wall\_Xyloglucan synthesis

| BinCode | BinName                     |
|---------|-----------------------------|
|         | 10.7 cell wall.modification |

### Starch biosynthesis

| BinCode | BinName |
|---------|---------|
|---------|---------|

|           |                                                                       |
|-----------|-----------------------------------------------------------------------|
| 2.2.2.1.1 | major CHO metabolism.degradation.starch.starch cleavage.alpha amylase |
| 2.2.2.1.2 | major CHO metabolism.degradation.starch.starch cleavage.beta amylase  |
| 2.2.2.6   | major CHO metabolism.degradation.starch.transporter                   |
| 2.2.2.8   | major CHO metabolism.degradation.starch.ISA3                          |

## Sucrose biosynthesis

| BinCode   | BinName                                                      |
|-----------|--------------------------------------------------------------|
| 2.2.1.3.1 | major CHO metabolism.degradation.sucrose.invertases.neutral  |
| 2.2.1.3.3 | major CHO metabolism.degradation.sucrose.invertases.vacuolar |
| 2.2.1.4   | major CHO metabolism.degradation.sucrose.hexokinase          |
| 2.2.1.4   | major CHO metabolism.degradation.sucrose.hexokinase          |

## Phenolics biosynthesis

| BinCode | BinName                             |
|---------|-------------------------------------|
| 16.1    | secondary metabolism.simple phenols |

## Phenylpropanoid biosynthesis

| BinCode   | BinName                                                           |
|-----------|-------------------------------------------------------------------|
| 16.2      | secondary metabolism.phenylpropanoids                             |
| 16.2      | secondary metabolism.phenylpropanoids                             |
| 16.2      | secondary metabolism.phenylpropanoids                             |
| 16.2.1.3  | secondary metabolism.phenylpropanoids.lignin biosynthesis.4CL     |
| 16.2.1.3  | secondary metabolism.phenylpropanoids.lignin biosynthesis.4CL     |
| 16.2.1.6  | secondary metabolism.phenylpropanoids.lignin biosynthesis.CCoAOMT |
| 16.2.1.10 | secondary metabolism.phenylpropanoids.lignin biosynthesis.CAD     |
| 16.2.1.10 | secondary metabolism.phenylpropanoids.lignin biosynthesis.CAD     |

## Flavonoids biosynthesis

| BinCode | BinName                                      |
|---------|----------------------------------------------|
| 16.8.1  | secondary metabolism.flavonoids.anthocyanins |
| 16.8.1  | secondary metabolism.flavonoids.anthocyanins |

|           |                                                                            |
|-----------|----------------------------------------------------------------------------|
| 16.8.1    | secondary metabolism.flavonoids.anthocyanins                               |
| 16.8.1    | secondary metabolism.flavonoids.anthocyanins                               |
| 16.8.1.21 | secondary metabolism.flavonoids.anthocyanins.anthocyanin 5-aromatic acy    |
| 16.8.1.21 | secondary metabolism.flavonoids.anthocyanins.anthocyanin 5-aromatic acy    |
| 16.8.3.1  | secondary metabolism.flavonoids.dihydroflavonols.dihydroflavonol 4-reduc   |
| 16.8.4.3  | secondary metabolism.flavonoids.flavonols.flavonol-3-O-rhamnosyltransfer   |
| 16.8.8.2  | secondary metabolism.flavonoids.flavonoid glycosylations.flavonol-3-O-glyc |

## Terpene biosynthesis

| BinCode   | BinName                                                              |
|-----------|----------------------------------------------------------------------|
| 16.1.1    | secondary metabolism.isoprenoids.non-mevalonate pathway              |
| 16.1.1    | secondary metabolism.isoprenoids.non-mevalonate pathway              |
| 16.1.1.10 | secondary metabolism.isoprenoids.non-mevalonate pathway.geranylgeran |
| 16.1.5    | secondary metabolism.isoprenoids.terpenoids                          |
| 16.1.5    | secondary metabolism.isoprenoids.terpenoids                          |
| 16.1.5    | secondary metabolism.isoprenoids.terpenoids                          |

## N Misc\_Glucosinolate synthesis

| BinCode       | BinName                                                                     |
|---------------|-----------------------------------------------------------------------------|
| 16.5.1.1.1.1  | secondary metabolism.sulfur-containing.glucosinolates.synthesis.aliphatic.k |
| 16.5.1.1.1.2  | secondary metabolism.sulfur-containing.glucosinolates.synthesis.aliphatic.r |
| 16.5.1.1.1.7  | secondary metabolism.sulfur-containing.glucosinolates.synthesis.aliphatic.( |
| 16.5.1.1.1.10 | secondary metabolism.sulfur-containing.glucosinolates.synthesis.aliphatic.f |
| 16.5.1.1.1.10 | secondary metabolism.sulfur-containing.glucosinolates.synthesis.aliphatic.f |
| 16.5.1.1.1.10 | secondary metabolism.sulfur-containing.glucosinolates.synthesis.aliphatic.f |
| 16.5.1.1.1.11 | secondary metabolism.sulfur-containing.glucosinolates.synthesis.aliphatic.g |
| 16.5.1.1.1.13 | secondary metabolism.sulfur-containing.glucosinolates.synthesis.aliphatic.z |
| 16.5.1.1.3.2  | secondary metabolism.sulfur-containing.glucosinolates.synthesis.indole.CYI  |
| 16.5.1.2.1    | secondary metabolism.sulfur-containing.glucosinolates.regulation.aliphatic  |
| 16.5.1.2.1    | secondary metabolism.sulfur-containing.glucosinolates.regulation.aliphatic  |
| 16.5.1.3.1    | secondary metabolism.sulfur-containing.glucosinolates.degradation.myrosi    |
| 16.5.1.3.1    | secondary metabolism.sulfur-containing.glucosinolates.degradation.myrosi    |
| 16.5.1.3.2.1  | secondary metabolism.sulfur-containing.glucosinolates.degradation.nitriles  |
| 16.5.1.3.3    | secondary metabolism.sulfur-containing.glucosinolates.degradation.nitrilas  |

## DNA Synthesis

| BinCode | BinName |
|---------|---------|
|---------|---------|

28.1 DNA.synthesis/chromatin structure  
 28.1 DNA.synthesis/chromatin structure  
 28.1 DNA.synthesis/chromatin structure  
 28.1.1 DNA.synthesis/chromatin structure.retrotransposon/transposase  
 28.1.1 DNA.synthesis/chromatin structure.retrotransposon/transposase  
 28.1.1 DNA.synthesis/chromatin structure.retrotransposon/transposase  
 28.1.1 DNA.synthesis/chromatin structure.retrotransposon/transposase  
 28.1.1.3 DNA.synthesis/chromatin structure.retrotransposon/transposase.copia-like  
 28.1.1.3 DNA.synthesis/chromatin structure.retrotransposon/transposase.copia-like  
 28.1.1.3 DNA.synthesis/chromatin structure.retrotransposon/transposase.copia-like  
 28.1.1.4 DNA.synthesis/chromatin structure.retrotransposon/transposase.hat-like tr  
 28.1.1.5 DNA.synthesis/chromatin structure.retrotransposon/transposase.CACTA-lik  
 28.1.3.1 DNA.synthesis/chromatin structure.histone.H1  
 28.1.3.2.1 DNA.synthesis/chromatin structure.histone.core.H2A  
 28.1.3.2.3 DNA.synthesis/chromatin structure.histone.core.H3  
 28.1.3.2.4 DNA.synthesis/chromatin structure.histone.core.H4

### **Lys biosynthesis**

| BinCode  | BinName                                                   |
|----------|-----------------------------------------------------------|
| 13.2.3.5 | amino acid metabolism.degradation.aspartate family.lysine |

### **Arg\_biosynthesis**

| BinCode  | BinName                                                     |
|----------|-------------------------------------------------------------|
| 13.2.2.3 | amino acid metabolism.degradation.glutamate family.arginine |

### **Mitochondrial electron transport**

| BinCode | BinName                                                                   |
|---------|---------------------------------------------------------------------------|
| 9.1.2   | mitochondrial electron transport / ATP synthesis.NADH-DH.localisation not |
| 9.1.2   | mitochondrial electron transport / ATP synthesis.NADH-DH.localisation not |
| 9.1.2   | mitochondrial electron transport / ATP synthesis.NADH-DH.localisation not |
| 9.9     | mitochondrial electron transport / ATP synthesis.F1-ATPase                |

### **Light reactions**

| BinCode | BinName                                                   |
|---------|-----------------------------------------------------------|
| 1.1.1.2 | PS.lightreaction.photosystem II.PSII polypeptide subunits |
| 1.1.2.2 | PS.lightreaction.photosystem I.PSI polypeptide subunits   |
| 1.1.2.2 | PS.lightreaction.photosystem I.PSI polypeptide subunits   |

|         |                                                         |
|---------|---------------------------------------------------------|
| 1.1.2.2 | PS.lightreaction.photosystem I.PSI polypeptide subunits |
| 1.1.2.2 | PS.lightreaction.photosystem I.PSI polypeptide subunits |
| 1.1.3.4 | PS.lightreaction.cytochrome b6/f.apocytochrome f (CYF)  |
| 1.1.6   | PS.lightreaction.NADH DH                                |

### Auxin synthesis

| BinCode | BinName                                                         |
|---------|-----------------------------------------------------------------|
| 17.2.1  | hormone metabolism.auxin.synthesis-degradation                  |
| 17.2.3  | hormone metabolism.auxin.induced-regulated-responsive-activated |

### Abscisic acid biosynthesis transcripts\_MapMan

| BinCode    | BinName                                                                 |
|------------|-------------------------------------------------------------------------|
| 17.1.1.2.1 | hormone metabolism.abscisic acid.synthesis-degradation.degradation.8-hy |
| 17.1.2     | hormone metabolism.abscisic acid.signal transduction                    |
| 17.1.3     | hormone metabolism.abscisic acid.induced-regulated-responsive-activated |

### Ethylene Biosynthesis pathway

| BinCode | BinName                                                            |
|---------|--------------------------------------------------------------------|
| 17.5.1  | hormone metabolism.ethylene.synthesis-degradation                  |
| 17.5.2  | hormone metabolism.ethylene.signal transduction                    |
| 17.5.2  | hormone metabolism.ethylene.signal transduction                    |
| 17.5.2  | hormone metabolism.ethylene.signal transduction                    |
| 17.5.3  | hormone metabolism.ethylene.induced-regulated-responsive-activated |
| 17.5.3  | hormone metabolism.ethylene.induced-regulated-responsive-activated |



## Overall hormone biosynthesis

| BinCode     | BinName                                                                 |
|-------------|-------------------------------------------------------------------------|
| 17.1.1.2.1  | hormone metabolism.abscisic acid.synthesis-degradation.degradation.8-hy |
| 17.1.2      | hormone metabolism.abscisic acid.signal transduction                    |
| 17.1.3      | hormone metabolism.abscisic acid.induced-regulated-responsive-activated |
| 17.2.1      | hormone metabolism.auxin.synthesis-degradation                          |
| 17.2.3      | hormone metabolism.auxin.induced-regulated-responsive-activated         |
| 17.3.1.1.3  | hormone metabolism.brassinosteroid.synthesis-degradation.BRs.CPD        |
| 17.3.1.1.99 | hormone metabolism.brassinosteroid.synthesis-degradation.BRs.other      |
| 17.3.1.2.99 | hormone metabolism.brassinosteroid.synthesis-degradation.sterols.other  |
| 17.4.1      | hormone metabolism.cytokinin.synthesis-degradation                      |
| 17.5.1      | hormone metabolism.ethylene.synthesis-degradation                       |
| 17.5.2      | hormone metabolism.ethylene.signal transduction                         |
| 17.5.2      | hormone metabolism.ethylene.signal transduction                         |
| 17.5.2      | hormone metabolism.ethylene.signal transduction                         |
| 17.5.3      | hormone metabolism.ethylene.induced-regulated-responsive-activated      |
| 17.5.3      | hormone metabolism.ethylene.induced-regulated-responsive-activated      |
| 17.6.1      | hormone metabolism.gibberelin.synthesis-degradation                     |
| 17.6.1.11   | hormone metabolism.gibberelin.synthesis-degradation.GA20 oxidase        |
| 17.6.3      | hormone metabolism.gibberelin.induced-regulated-responsive-activated    |
| 17.6.3      | hormone metabolism.gibberelin.induced-regulated-responsive-activated    |
| 17.7.1.2    | hormone metabolism.jasmonate.synthesis-degradation.lipoxygenase         |
| 17.7.1.5    | hormone metabolism.jasmonate.synthesis-degradation.12-Oxo-PDA-reduct    |
| 17.7.1.10   | hormone metabolism.jasmonate.synthesis-degradation.jasmonate-O-meth     |
| 17.7.3      | hormone metabolism.jasmonate.induced-regulated-responsive-activated     |
| 17.7.3      | hormone metabolism.jasmonate.induced-regulated-responsive-activated     |

- 17.7.3 hormone metabolism.jasmonate.induced-regulated-responsive-activated
- 17.8.1 hormone metabolism.salicylic acid.synthesis-degradation
- 17.8.1 hormone metabolism.salicylic acid.synthesis-degradation
- 17.8.1.1.7 hormone metabolism.salicylic acid.synthesis-degradation.synthesis.methyl-

| id        | Type       |
|-----------|------------|
| at5g24770 | Transcript |
| at5g24780 | Transcript |
| at2g42200 | Transcript |
| at3g15270 | Transcript |
| at1g01720 | Transcript |
| at1g05420 | Transcript |
| at1g12260 | Transcript |
| at1g13245 | Transcript |
| at1g19200 | Transcript |
| at1g26600 | Transcript |
| at1g52890 | Transcript |
| at1g56200 | Transcript |
| at1g69320 | Transcript |
| at1g69970 | Transcript |
| at1g71930 | Transcript |
| at2g16660 | Transcript |
| at2g41380 | Transcript |
| at2g45330 | Transcript |
| at3g03200 | Transcript |
| at3g15400 | Transcript |
| at3g53210 | Transcript |
| at3g61190 | Transcript |
| at4g24220 | Transcript |
| at4g28190 | Transcript |
| at4g35783 | Transcript |
| at5g09805 | Transcript |
| at5g15800 | Transcript |
| at5g41090 | Transcript |
| at5g43070 | Transcript |
| at5g50800 | Transcript |
| at5g60910 | Transcript |
| at5g62210 | Transcript |
| at5g64667 | Transcript |

| id        | type       |
|-----------|------------|
| at3g02510 | Transcript |
| at5g43070 | Transcript |

at5g60870 Transcript

| id        | type       |
|-----------|------------|
| at1g19610 | Transcript |
| at1g19670 | Transcript |
| at1g20030 | Transcript |
| at1g58848 | Transcript |
| at1g66100 | Transcript |
| at1g73620 | Transcript |
| at1g77700 | Transcript |
| at2g14610 | Transcript |
| at4g09950 | Transcript |
| at4g19810 | Transcript |
| at4g19820 | Transcript |
| at4g24180 | Transcript |
| at4g37000 | Transcript |
| at4g39030 | Transcript |
| at5g40020 | Transcript |
| at1g65390 | Transcript |
| at1g58807 | Transcript |
| at1g65870 | Transcript |

| id        | type       |
|-----------|------------|
| at1g07400 | Transcript |
| at1g54050 | Transcript |
| at1g56300 | Transcript |
| at1g77020 | Transcript |
| at3g62190 | Transcript |
| at5g64360 | Transcript |

| id        | type       |
|-----------|------------|
| at1g77390 | Transcript |
| at2g23430 | Transcript |
| at2g42260 | Transcript |
| at4g03270 | Transcript |
| at5g65420 | Transcript |

| id        | type       |
|-----------|------------|
| at2g42530 | Transcript |
| at2g42540 | Transcript |
| at4g38680 | Transcript |
| at5g52310 | Transcript |

| id        | type       |
|-----------|------------|
| at4g15910 | Transcript |

| id        | type       |
|-----------|------------|
| at1g06530 | Transcript |
| at1g12710 | Transcript |
| at1g43700 | Transcript |
| at1g71790 | Transcript |
| at2g02350 | Transcript |
| at2g38750 | Transcript |
| at2g38760 | Transcript |
| at2g42170 | Transcript |
| at3g60840 | Transcript |
| at4g08580 | Transcript |
| at4g14390 | Transcript |
| at4g19150 | Transcript |
| at5g15970 | Transcript |
| at5g20110 | Transcript |
| at5g52120 | Transcript |
| at5g54720 | Transcript |
| at5g64920 | Transcript |

| id        | type       |
|-----------|------------|
| at1g03620 | Transcript |
| at1g05135 | Transcript |
| at1g08160 | Transcript |
| at1g10657 | Transcript |
| at1g14880 | Transcript |
| at1g15200 | Transcript |

|           |            |
|-----------|------------|
| at1g15405 | Transcript |
| at1g21326 | Transcript |
| at1g21880 | Transcript |
| at1g24577 | Transcript |
| at1g28815 | Transcript |
| at1g29395 | Transcript |
| at1g47578 | Transcript |
| at1g50970 | Transcript |
| at1g68230 | Transcript |
| at1g72620 | Transcript |
| at1g74290 | Transcript |
| at1g74340 | Transcript |
| at1g76560 | Transcript |
| at1g77630 | Transcript |

| id        | type       |
|-----------|------------|
| at5g04200 | Transcript |
| at1g04110 | Transcript |
| at1g20850 | Transcript |
| at3g48350 | Transcript |
| at4g11320 | Transcript |
| at4g35350 | Transcript |
| at2g22980 | Transcript |
| at2g23010 | Transcript |
| at2g26390 | Transcript |
| at5g27660 | Transcript |
| at3g28510 | Transcript |
| at2g47110 | Transcript |
| at5g14360 | Transcript |
| at1g63800 | Transcript |
| at4g36410 | Transcript |
| at1g02610 | Transcript |
| at1g23980 | Transcript |
| at1g49210 | Transcript |
| at1g49230 | Transcript |
| at1g60360 | Transcript |
| at1g72175 | Transcript |
| at2g34200 | Transcript |
| at2g37580 | Transcript |

|           |            |
|-----------|------------|
| at3g11110 | Transcript |
| at3g46620 | Transcript |
| at4g08590 | Transcript |
| at5g01520 | Transcript |
| at5g01880 | Transcript |
| at5g01980 | Transcript |
| at5g15820 | Transcript |
| at5g49665 | Transcript |
| at1g10890 | Transcript |
| at1g26930 | Transcript |
| at1g27420 | Transcript |
| at1g31350 | Transcript |
| at1g77000 | Transcript |
| at2g17036 | Transcript |
| at2g27310 | Transcript |
| at3g18320 | Transcript |
| at3g23260 | Transcript |
| at3g59940 | Transcript |
| at4g03030 | Transcript |
| at4g36840 | Transcript |
| at4g39550 | Transcript |
| at4g39600 | Transcript |
| at5g26960 | Transcript |
| at5g49000 | Transcript |

| id        | type       |
|-----------|------------|
| at1g13350 | Transcript |
| at1g32640 | Transcript |
| at1g66700 | Transcript |
| at2g30360 | Transcript |
| at2g32510 | Transcript |
| at2g32960 | Transcript |
| at3g05640 | Transcript |
| at3g57740 | Transcript |
| at4g13000 | Transcript |
| at4g14580 | Transcript |
| at4g17480 | Transcript |
| at4g27800 | Transcript |
| at4g28560 | Transcript |

|           |            |
|-----------|------------|
| at4g32950 | Transcript |
| at5g67080 | Transcript |

| id        | type       |
|-----------|------------|
| at4g08950 | Transcript |
| at5g52390 | Transcript |
| at1g66830 | Transcript |
| at3g14840 | Transcript |
| at1g09970 | Transcript |
| at1g78530 | Transcript |
| at4g11521 | Transcript |
| at2g48010 | Transcript |
| at1g21240 | Transcript |
| at1g33260 | Transcript |
| at1g51820 | Transcript |
| at2g33020 | Transcript |
| at3g46280 | Transcript |
| at4g10390 | Transcript |
| at1g52410 | Transcript |
| at2g33380 | Transcript |
| at3g29000 | Transcript |
| at3g52870 | Transcript |
| at5g42380 | Transcript |
| at5g54490 | Transcript |
| at5g61900 | Transcript |
| at5g62390 | Transcript |
| at2g41210 | Transcript |
| at1g52240 | Transcript |
| at3g09910 | Transcript |
| at3g59220 | Transcript |
| at4g32990 | Transcript |
| at5g56230 | Transcript |
| at4g23050 | Transcript |
| at5g02200 | Transcript |
| at5g47800 | Transcript |



| id        | type       |
|-----------|------------|
| at1g19120 | Transcript |
| at3g16380 | Transcript |
| at3g56705 | Transcript |
| at1g03140 | Transcript |
| at1g27650 | Transcript |
| at2g37340 | Transcript |
| at3g55460 | Transcript |
| at4g31580 | Transcript |
| at5g42820 | Transcript |
| at4g16680 | Transcript |
| at5g10350 | Transcript |
| at5g65260 | Transcript |
| at1g26820 | Transcript |
| at2g02990 | Transcript |
| at3g20390 | Transcript |

| id        | type       |
|-----------|------------|
| at1g21600 | Transcript |
| at5g09830 | Transcript |
| at2g36080 | Transcript |
| at5g26210 | Transcript |
| at1g43160 | Transcript |
| at1g46768 | Transcript |
| at1g74930 | Transcript |
| at2g22200 | Transcript |
| at2g23340 | Transcript |
| at2g33710 | Transcript |
| at4g06746 | Transcript |
| at4g36900 | Transcript |
| at5g13330 | Transcript |
| at1g10585 | Transcript |
| at1g10610 | Transcript |
| at1g35460 | Transcript |
| at2g46970 | Transcript |
| at3g05800 | Transcript |
| at3g06120 | Transcript |
| at5g53210 | Transcript |

|           |            |
|-----------|------------|
| at1g25440 | Transcript |
| at1g28050 | Transcript |
| at1g68520 | Transcript |
| at5g24930 | Transcript |
| at1g47655 | Transcript |
| at5g02460 | Transcript |
| at5g60850 | Transcript |
| at2g18380 | Transcript |
| at4g36620 | Transcript |
| at1g29600 | Transcript |
| at2g37430 | Transcript |
| at5g03510 | Transcript |
| at5g04340 | Transcript |
| at5g43170 | Transcript |
| at5g67450 | Transcript |
| at3g47120 | Transcript |
| at2g27470 | Transcript |
| at3g46640 | Transcript |
| at5g06800 | Transcript |
| at5g17490 | Transcript |
| at1g27045 | Transcript |
| at2g22800 | Transcript |
| at3g17050 | Transcript |
| at3g18010 | Transcript |
| at1g24260 | Transcript |
| at1g59930 | Transcript |
| at5g15800 | Transcript |
| at5g60440 | Transcript |
| at5g65050 | Transcript |
| at1g18710 | Transcript |
| at1g74430 | Transcript |
| at2g03470 | Transcript |
| at2g23290 | Transcript |
| at2g47190 | Transcript |
| at3g23250 | Transcript |
| at3g46130 | Transcript |
| at5g07690 | Transcript |
| at5g07700 | Transcript |
| at5g59780 | Transcript |
| at5g67300 | Transcript |
| at1g01380 | Transcript |

|           |            |
|-----------|------------|
| at4g36570 | Transcript |
| at3g03200 | Transcript |
| at3g15500 | Transcript |
| at2g45680 | Transcript |
| at1g54060 | Transcript |
| at2g38250 | Transcript |
| at2g44730 | Transcript |
| at3g10040 | Transcript |
| at3g11100 | Transcript |
| at3g14180 | Transcript |
| at3g24860 | Transcript |
| at4g29030 | Transcript |
| at4g31270 | Transcript |
| at5g05550 | Transcript |
| at1g66600 | Transcript |
| at3g01970 | Transcript |
| at3g58710 | Transcript |
| at4g23550 | Transcript |
| at4g39410 | Transcript |
| at5g24110 | Transcript |
| at2g41070 | Transcript |
| at2g46270 | Transcript |
| at3g02550 | Transcript |
| at2g25930 | Transcript |
| at2g18000 | Transcript |
| at1g08460 | Transcript |
| at1g22310 | Transcript |
| at3g15790 | Transcript |
| at1g74480 | Transcript |
| at3g52450 | Transcript |
| at1g20220 | Transcript |
| at1g63295 | Transcript |

| id        | type       |
|-----------|------------|
| at1g01240 | Transcript |
| at1g01990 | Transcript |
| at1g03180 | Transcript |
| at1g10000 | Transcript |
| at1g10140 | Transcript |

|           |            |
|-----------|------------|
| at1g10990 | Transcript |
| at1g11170 | Transcript |
| at1g11380 | Transcript |
| at1g11440 | Transcript |
| at1g11500 | Transcript |
| at1g11700 | Transcript |
| at1g12845 | Transcript |
| at1g13990 | Transcript |
| at1g15230 | Transcript |
| at1g15415 | Transcript |
| at1g15830 | Transcript |
| at1g16500 | Transcript |
| at1g16916 | Transcript |
| at1g17380 | Transcript |
| at1g17830 | Transcript |
| at1g18265 | Transcript |
| at1g19397 | Transcript |
| at1g19960 | Transcript |
| at1g20520 | Transcript |
| at1g21525 | Transcript |
| at1g25400 | Transcript |
| at1g26210 | Transcript |
| at1g26945 | Transcript |
| at1g27110 | Transcript |
| at1g27300 | Transcript |
| at1g28070 | Transcript |
| at1g28190 | Transcript |
| at1g29560 | Transcript |
| at1g29640 | Transcript |
| at1g30880 | Transcript |
| at1g31240 | Transcript |
| at1g32190 | Transcript |
| at1g32630 | Transcript |
| at1g33612 | Transcript |
| at1g34245 | Transcript |
| at1g34315 | Transcript |
| at1g38131 | Transcript |
| at1g43675 | Transcript |
| at1g43790 | Transcript |
| at1g45229 | Transcript |
| at1g47970 | Transcript |

|           |            |
|-----------|------------|
| at1g48300 | Transcript |
| at1g49470 | Transcript |
| at1g49700 | Transcript |
| at1g52155 | Transcript |
| at1g52565 | Transcript |
| at1g52905 | Transcript |
| at1g53480 | Transcript |
| at1g53625 | Transcript |
| at1g53887 | Transcript |
| at1g54120 | Transcript |
| at1g55265 | Transcript |
| at1g55370 | Transcript |
| at1g56555 | Transcript |
| at1g58235 | Transcript |
| at1g60870 | Transcript |
| at1g61600 | Transcript |
| at1g63530 | Transcript |
| at1g64560 | Transcript |
| at1g64572 | Transcript |
| at1g64680 | Transcript |
| at1g64690 | Transcript |
| at1g67025 | Transcript |
| at1g67600 | Transcript |
| at1g68140 | Transcript |
| at1g68340 | Transcript |
| at1g68526 | Transcript |
| at1g68875 | Transcript |
| at1g69260 | Transcript |
| at1g69360 | Transcript |
| at1g70700 | Transcript |
| at1g71015 | Transcript |
| at1g71080 | Transcript |
| at1g73210 | Transcript |
| at1g74055 | Transcript |
| at1g75190 | Transcript |
| at1g75360 | Transcript |
| at1g76200 | Transcript |
| at1g76440 | Transcript |
| at1g79770 | Transcript |
| at1g80120 | Transcript |
| at1g80890 | Transcript |

|           |            |
|-----------|------------|
| at2g01021 | Transcript |
| at2g01080 | Transcript |
| at2g01755 | Transcript |
| at2g01913 | Transcript |
| at2g04410 | Transcript |
| at2g05310 | Transcript |
| at2g05950 | Transcript |
| at2g07776 | Transcript |
| at2g10931 | Transcript |
| at2g11910 | Transcript |
| at2g12461 | Transcript |
| at2g15960 | Transcript |
| at2g17350 | Transcript |
| at2g17442 | Transcript |
| at2g17470 | Transcript |
| at2g17990 | Transcript |
| at2g20480 | Transcript |
| at2g20875 | Transcript |
| at2g22080 | Transcript |
| at2g22790 | Transcript |
| at2g25625 | Transcript |
| at2g28370 | Transcript |
| at2g30615 | Transcript |
| at2g31840 | Transcript |
| at2g31940 | Transcript |
| at2g31945 | Transcript |
| at2g33400 | Transcript |
| at2g33855 | Transcript |
| at2g34070 | Transcript |
| at2g34600 | Transcript |
| at2g35070 | Transcript |
| at2g36420 | Transcript |
| at2g37035 | Transcript |
| at2g37380 | Transcript |
| at2g38500 | Transcript |
| at2g38823 | Transcript |
| at2g39690 | Transcript |
| at2g41640 | Transcript |
| at2g41780 | Transcript |
| at2g42040 | Transcript |
| at2g42610 | Transcript |

|           |            |
|-----------|------------|
| at2g43018 | Transcript |
| at2g44080 | Transcript |
| at2g44525 | Transcript |
| at2g45380 | Transcript |
| at2g45520 | Transcript |
| at2g46000 | Transcript |
| at2g46640 | Transcript |
| at2g47485 | Transcript |
| at3g01430 | Transcript |
| at3g01960 | Transcript |
| at3g02390 | Transcript |
| at3g02410 | Transcript |
| at3g03370 | Transcript |
| at3g03460 | Transcript |
| at3g04890 | Transcript |
| at3g05727 | Transcript |
| at3g06035 | Transcript |
| at3g06868 | Transcript |
| at3g07030 | Transcript |
| at3g09162 | Transcript |
| at3g09980 | Transcript |
| at3g11570 | Transcript |
| at3g12460 | Transcript |
| at3g13480 | Transcript |
| at3g14190 | Transcript |
| at3g14452 | Transcript |
| at3g14981 | Transcript |
| at3g15534 | Transcript |
| at3g16070 | Transcript |
| at3g16660 | Transcript |
| at3g16670 | Transcript |
| at3g17160 | Transcript |
| at3g18790 | Transcript |
| at3g18800 | Transcript |
| at3g19250 | Transcript |
| at3g19660 | Transcript |
| at3g19990 | Transcript |
| at3g21550 | Transcript |
| at3g23450 | Transcript |
| at3g23930 | Transcript |
| at3g24065 | Transcript |

|           |            |
|-----------|------------|
| at3g24535 | Transcript |
| at3g24740 | Transcript |
| at3g25545 | Transcript |
| at3g25870 | Transcript |
| at3g26440 | Transcript |
| at3g27030 | Transcript |
| at3g27100 | Transcript |
| at3g27210 | Transcript |
| at3g27250 | Transcript |
| at3g28857 | Transcript |
| at3g29575 | Transcript |
| at3g29633 | Transcript |
| at3g47836 | Transcript |
| at3g47965 | Transcript |
| at3g48120 | Transcript |
| at3g51940 | Transcript |
| at3g52070 | Transcript |
| at3g52105 | Transcript |
| at3g52110 | Transcript |
| at3g55240 | Transcript |
| at3g55990 | Transcript |
| at3g56360 | Transcript |
| at3g59900 | Transcript |
| at3g60286 | Transcript |
| at3g61770 | Transcript |
| at3g61898 | Transcript |
| at3g61920 | Transcript |
| at3g63160 | Transcript |
| at3g63540 | Transcript |
| at4g01080 | Transcript |
| at4g01670 | Transcript |
| at4g02541 | Transcript |
| at4g04614 | Transcript |
| at4g04925 | Transcript |
| at4g04972 | Transcript |
| at4g08555 | Transcript |
| at4g10290 | Transcript |
| at4g11300 | Transcript |
| at4g11911 | Transcript |
| at4g12990 | Transcript |
| at4g13195 | Transcript |



|           |            |
|-----------|------------|
| at4g13320 | Transcript |
| at4g13520 | Transcript |
| at4g13530 | Transcript |
| at4g13540 | Transcript |
| at4g14270 | Transcript |
| at4g14743 | Transcript |
| at4g16215 | Transcript |
| at4g16240 | Transcript |
| at4g16530 | Transcript |
| at4g17486 | Transcript |
| at4g17860 | Transcript |
| at4g17940 | Transcript |
| at4g18425 | Transcript |
| at4g18501 | Transcript |
| at4g19390 | Transcript |
| at4g19430 | Transcript |
| at4g21740 | Transcript |
| at4g21920 | Transcript |
| at4g23870 | Transcript |
| at4g24110 | Transcript |
| at4g25690 | Transcript |
| at4g26255 | Transcript |
| at4g27657 | Transcript |
| at4g28020 | Transcript |
| at4g28085 | Transcript |
| at4g28290 | Transcript |
| at4g30097 | Transcript |
| at4g30230 | Transcript |
| at4g31330 | Transcript |
| at4g31510 | Transcript |
| at4g32340 | Transcript |
| at4g33560 | Transcript |
| at4g36950 | Transcript |
| at4g36980 | Transcript |
| at4g37445 | Transcript |
| at4g38260 | Transcript |
| at5g01015 | Transcript |
| at5g02090 | Transcript |
| at5g02550 | Transcript |
| at5g03110 | Transcript |
| at5g03210 | Transcript |

|           |            |
|-----------|------------|
| at5g03830 | Transcript |
| at5g05250 | Transcript |
| at5g05330 | Transcript |
| at5g05840 | Transcript |
| at5g06190 | Transcript |
| at5g06230 | Transcript |
| at5g09672 | Transcript |
| at5g09840 | Transcript |
| at5g10310 | Transcript |
| at5g10625 | Transcript |
| at5g13250 | Transcript |
| at5g13310 | Transcript |
| at5g13340 | Transcript |
| at5g13760 | Transcript |
| at5g14110 | Transcript |
| at5g14390 | Transcript |
| at5g14410 | Transcript |
| at5g15120 | Transcript |
| at5g16110 | Transcript |
| at5g16950 | Transcript |
| at5g17900 | Transcript |
| at5g18065 | Transcript |
| at5g18920 | Transcript |
| at5g19240 | Transcript |
| at5g19875 | Transcript |
| at5g19950 | Transcript |
| at5g20130 | Transcript |
| at5g20670 | Transcript |
| at5g21970 | Transcript |
| at5g22430 | Transcript |
| at5g22545 | Transcript |
| at5g22930 | Transcript |
| at5g23155 | Transcript |
| at5g23410 | Transcript |
| at5g24655 | Transcript |
| at5g24735 | Transcript |
| at5g25210 | Transcript |
| at5g25240 | Transcript |
| at5g27860 | Transcript |
| at5g34800 | Transcript |
| at5g34871 | Transcript |

|           |            |
|-----------|------------|
| at5g37300 | Transcript |
| at5g38870 | Transcript |
| at5g40970 | Transcript |
| at5g40980 | Transcript |
| at5g45320 | Transcript |
| at5g45469 | Transcript |
| at5g45740 | Transcript |
| at5g47920 | Transcript |
| at5g48690 | Transcript |
| at5g49525 | Transcript |
| at5g50335 | Transcript |
| at5g50940 | Transcript |
| at5g51390 | Transcript |
| at5g51720 | Transcript |
| at5g53110 | Transcript |
| at5g53220 | Transcript |
| at5g53740 | Transcript |
| at5g53800 | Transcript |
| at5g53880 | Transcript |
| at5g54890 | Transcript |
| at5g56050 | Transcript |
| at5g56520 | Transcript |
| at5g57080 | Transcript |
| at5g57123 | Transcript |
| at5g57570 | Transcript |
| at5g57770 | Transcript |
| at5g58020 | Transcript |
| at5g58920 | Transcript |
| at5g60430 | Transcript |
| at5g60720 | Transcript |
| at5g61820 | Transcript |
| at5g63690 | Transcript |
| at5g63820 | Transcript |
| at5g64395 | Transcript |
| at5g65207 | Transcript |
| at5g65300 | Transcript |
| at5g65580 | Transcript |
| at5g66230 | Transcript |
| at5g67490 | Transcript |
| at5g67620 | Transcript |
| atcg00530 | Transcript |

| id        | type       |
|-----------|------------|
| at1g06620 | Transcript |
| at1g06640 | Transcript |
| at1g14730 | Transcript |
| at1g19570 | Transcript |
| at3g09940 | Transcript |
| at4g35970 | Transcript |
| at1g28480 | Transcript |
| at1g32760 | Transcript |
| at1g64500 | Transcript |
| at3g28850 | Transcript |
| at3g62960 | Transcript |
| at4g15660 | Transcript |

| id        | type       |
|-----------|------------|
| at1g02335 | Transcript |
| at3g18485 | Transcript |
| at1g53030 | Transcript |
| at2g33740 | Transcript |
| at3g48970 | Transcript |
| at4g35060 | Transcript |
| at1g07610 | Transcript |
| at2g18196 | Transcript |

| id        | type       |
|-----------|------------|
| at2g28315 | Transcript |
| at5g04750 | Transcript |
| at1g07290 | Transcript |
| at1g08890 | Transcript |
| at1g61790 | Transcript |
| at1g08230 | Transcript |
| at5g02170 | Transcript |

|           |            |
|-----------|------------|
| at5g17520 | Transcript |
| at3g48850 | Transcript |
| at3g62650 | Transcript |
| at5g64970 | Transcript |
| at1g16310 | Transcript |
| at3g46900 | Transcript |
| at1g18880 | Transcript |
| at1g33440 | Transcript |
| at1g59740 | Transcript |
| at2g37900 | Transcript |
| at3g06370 | Transcript |
| at4g31290 | Transcript |
| at5g64560 | Transcript |
| at4g30940 | Transcript |
| at1g71330 | Transcript |
| at3g52310 | Transcript |
| at4g29140 | Transcript |
| at5g60660 | Transcript |
| at2g28910 | Transcript |
| at1g25500 | Transcript |
| at1g29520 | Transcript |
| at1g66760 | Transcript |
| at2g04070 | Transcript |
| at2g17500 | Transcript |
| at4g21910 | Transcript |
| at5g58070 | Transcript |
| at5g66110 | Transcript |

| id        | type       |
|-----------|------------|
| at1g03870 | Transcript |
| at1g35230 | Transcript |
| at1g68725 | Transcript |
| at2g04780 | Transcript |
| at2g23130 | Transcript |
| at2g45470 | Transcript |
| at4g09030 | Transcript |
| at4g16980 | Transcript |
| at4g37450 | Transcript |

|           |            |
|-----------|------------|
| at4g40090 | Transcript |
| at5g06390 | Transcript |
| at5g18690 | Transcript |
| at5g56540 | Transcript |
| at5g60490 | Transcript |
| at5g64310 | Transcript |
| at5g65390 | Transcript |

| id        | type       |
|-----------|------------|
| at1g24070 | Transcript |
| at4g13410 | Transcript |
| at4g16590 | Transcript |
| at4g18780 | Transcript |
| at4g24000 | Transcript |

| id        | type       |
|-----------|------------|
| at1g10640 | Transcript |
| at1g23460 | Transcript |
| at1g23470 | Transcript |
| at1g60390 | Transcript |
| at3g15720 | Transcript |
| at5g14650 | Transcript |

| id        | type       |
|-----------|------------|
| at1g26770 | Transcript |
| at1g65310 | Transcript |
| at2g14620 | Transcript |
| at3g23730 | Transcript |
| at4g17030 | Transcript |
| at5g13870 | Transcript |
| at5g57550 | Transcript |

| id | type |
|----|------|
|----|------|

|           |            |
|-----------|------------|
| at4g25000 | Transcript |
| at4g15210 | Transcript |
| at5g17520 | Transcript |
| at4g09020 | Transcript |

| id        | type       |
|-----------|------------|
| at3g06500 | Transcript |
| at1g62660 | Transcript |
| at1g50460 | Transcript |
| at3g20040 | Transcript |

| id        | type       |
|-----------|------------|
| at1g76790 | Transcript |
| at2g29130 | Transcript |
| at2g38080 | Transcript |
| at5g01190 | Transcript |
| at5g03260 | Transcript |
| at5g60020 | Transcript |

| id        | type       |
|-----------|------------|
| at1g32100 | Transcript |
| at3g50280 | Transcript |
| at5g16410 | Transcript |
| at1g65060 | Transcript |
| at5g38120 | Transcript |
| at1g67990 | Transcript |
| at4g34230 | Transcript |
| at4g37990 | Transcript |

| id        | type       |
|-----------|------------|
| at1g56650 | Transcript |
| at2g38240 | Transcript |

|           |            |
|-----------|------------|
| at3g55970 | Transcript |
| at5g05600 | Transcript |
| at1g03940 | Transcript |
| at5g61160 | Transcript |
| at4g35420 | Transcript |
| at5g17050 | Transcript |
| at1g06000 | Transcript |

| id        | type       |
|-----------|------------|
| at3g12070 | Transcript |
| at5g41820 | Transcript |
| at1g49530 | Transcript |
| at2g24210 | Transcript |
| at3g45130 | Transcript |
| at4g16740 | Transcript |

| id        | type       |
|-----------|------------|
| at3g19710 | Transcript |
| at5g23010 | Transcript |
| at4g13770 | Transcript |
| at1g62540 | Transcript |
| at1g62560 | Transcript |
| at1g65860 | Transcript |
| at4g03060 | Transcript |
| at2g25450 | Transcript |
| at2g22330 | Transcript |
| at5g07690 | Transcript |
| at5g07700 | Transcript |
| at1g52040 | Transcript |
| at1g54010 | Transcript |
| at1g54040 | Transcript |
| at3g44300 | Transcript |

| id | type |
|----|------|
|----|------|



|           |            |
|-----------|------------|
| at1g11190 | Transcript |
| at1g49450 | Transcript |
| at4g04410 | Transcript |
| at2g10410 | Transcript |
| at3g02515 | Transcript |
| at3g42658 | Transcript |
| at5g28913 | Transcript |
| at2g07080 | Transcript |
| at3g21050 | Transcript |
| at3g43690 | Transcript |
| at5g64685 | Transcript |
| at3g43828 | Transcript |
| at2g18050 | Transcript |
| at4g13570 | Transcript |
| at1g09200 | Transcript |
| at1g07660 | Transcript |

|           |            |
|-----------|------------|
| id        | type       |
| at4g33150 | Transcript |

|           |            |
|-----------|------------|
| id        | type       |
| at4g08870 | Transcript |

|           |            |
|-----------|------------|
| id        | type       |
| at2g07711 | Transcript |
| at3g62790 | Transcript |
| at5g52840 | Transcript |
| atmg01080 | Transcript |

|           |            |
|-----------|------------|
| id        | type       |
| at2g30790 | Transcript |
| atcg00020 | Transcript |
| atcg00280 | Transcript |
| atcg00680 | Transcript |
| atcg00340 | Transcript |
| atcg00350 | Transcript |

|           |            |
|-----------|------------|
| atcg00630 | Transcript |
| atcg01060 | Transcript |
| atcg00540 | Transcript |
| atcg01080 | Transcript |

| id        | type       |
|-----------|------------|
| at1g05560 | Transcript |
| at1g44350 | Transcript |
| at1g51760 | Transcript |
| at1g51780 | Transcript |
| at3g02875 | Transcript |
| at3g44300 | Transcript |
| at1g19840 | Transcript |
| at2g45210 | Transcript |
| at4g34780 | Transcript |
| at4g34800 | Transcript |

| id        | type       |
|-----------|------------|
| at4g19230 | Transcript |
| at4g34000 | Transcript |
| at4g36720 | Transcript |
| at5g08350 | Transcript |
| at5g15960 | Transcript |
| at5g23350 | Transcript |
| at5g23370 | Transcript |
| at5g59220 | Transcript |

| id        | type       |
|-----------|------------|
| at2g25450 | Transcript |
| at2g44840 | Transcript |
| at4g05170 | Transcript |
| at5g61600 | Transcript |
| at3g62550 | Transcript |
| at4g37150 | Transcript |

| id        | type       |
|-----------|------------|
| at4g19230 | Transcript |
| at4g34000 | Transcript |
| at4g36720 | Transcript |
| at5g08350 | Transcript |
| at5g15960 | Transcript |
| at5g23350 | Transcript |
| at5g23370 | Transcript |
| at5g59220 | Transcript |
| at1g05560 | Transcript |
| at1g44350 | Transcript |
| at1g51760 | Transcript |
| at1g51780 | Transcript |
| at3g02875 | Transcript |
| at3g44300 | Transcript |
| at1g19840 | Transcript |
| at2g45210 | Transcript |
| at4g34780 | Transcript |
| at4g34800 | Transcript |
| at5g05690 | Transcript |
| at4g36380 | Transcript |
| at5g24155 | Transcript |
| at1g75450 | Transcript |
| at2g25450 | Transcript |
| at2g44840 | Transcript |
| at4g05170 | Transcript |
| at5g61600 | Transcript |
| at3g62550 | Transcript |
| at4g37150 | Transcript |
| at4g03060 | Transcript |
| at4g25420 | Transcript |
| at1g22690 | Transcript |
| at5g59845 | Transcript |
| at3g45140 | Transcript |
| at2g06050 | Transcript |
| at1g19640 | Transcript |
| at1g54040 | Transcript |
| at3g16460 | Transcript |

|           |            |
|-----------|------------|
| at3g16470 | Transcript |
| at1g05680 | Transcript |
| at5g38780 | Transcript |
| at3g11480 | Transcript |

## Description

Symbols: VSP2, ATVSP2 | VSP2 (VEGETATIVE STORAGE PROTEIN 2); acid phosphatase | chr5:8500476-8500476 REVERSE

Symbols: VSP1, ATVSP1 | VSP1 (VEGETATIVE STORAGE PROTEIN 1); acid phosphatase/ transcription factor | chr5:8500476-8500476 REVERSE

Symbols: SPL9 | SPL9 (SQUAMOSA PROMOTER BINDING PROTEIN-LIKE 9); transcription factor | chr2:1590073-1590073 FORWARD

Symbols: SPL5 | SPL5 (SQUAMOSA PROMOTER BINDING PROTEIN-LIKE 5); DNA binding / transcription factor | chr2:1590073-1590073 FORWARD

Symbols: ATAF1, ANAC002 | ATAF1; transcription activator/ transcription factor | chr1:268330-269819 FORWARD

Symbols: ATOFP12, OFP12 | OFP12 (OVATE FAMILY PROTEIN 12) | chr1:1590073-1590753 FORWARD

Symbols: VND4, EMB2749, ANAC007 | ANAC007 (ARABIDOPSIS NAC 007); transcription factor | chr1:4525486-4525486 REVERSE

Symbols: RTFL17, DVL4 | RTFL17 (ROTUNDIFOLIA LIKE 17) | chr1:4525486-4526064 REVERSE

senescence-associated protein-related | chr1:6625020-6625856 REVERSE

Symbols: CLE9 | CLE9 (CLAVATA3/ESR-RELATED 9); protein binding / receptor binding | chr1:9191607-9191607 REVERSE

Symbols: ANAC019 | ANAC019 (Arabidopsis NAC domain containing protein 19); transcription factor | chr1:21030794-21032078 FORWARD

Symbols: emb1303 | emb1303 (embryo defective 1303) | chr1:21030794-21032078 FORWARD

Symbols: CLE10 | CLE10 (CLAVATA3/ESR-RELATED 10); protein binding / receptor binding | chr1:26061-26061 REVERSE

Symbols: CLE26 | CLE26 (CLAVATA3/ESR-RELATED 26); protein binding / receptor binding | chr1:26353-26353 REVERSE

Symbols: VND7, ANAC030 | VND7 (VASCULAR RELATED NAC-DOMAIN PROTEIN 7); transcription activator | chr2:7218706-7221625 REVERSE

nodulin family protein | chr2:7218706-7221625 REVERSE

embryo-abundant protein-related | chr2:17251941-17253057 FORWARD

Symbols: emb1067 | emb1067 (embryo defective 1067); tRNA 2'-phosphotransferase/ transferase, transaminase | chr2:17251941-17253057 FORWARD

Symbols: anac045 | anac045 (Arabidopsis NAC domain containing protein 45); transcription factor | chr3:5201644-5203197 FORWARD

Symbols: ATA20 | ATA20 | chr3:5201644-5203197 FORWARD

nodulin MtN21 family protein | chr3:19720165-19721875 FORWARD

Symbols: BAP1 | BAP1 (BON ASSOCIATION PROTEIN 1); phospholipid binding / protein binding | chr3:12564945-12566755 FORWARD

Symbols: VEP1, AWI31 | VEP1 (VEIN PATTERNING 1); binding / catalytic | chr4:12564945-12566755 FORWARD

Symbols: ULT1, ULT | ULT1 (ULTRAPETALA1); DNA binding | chr4:13985461-13987261 FORWARD

Symbols: RTFL6, DVL17 | RTFL6 (ROTUNDIFOLIA LIKE 6) | chr4:16952406-16952800 FORWARD

Symbols: IDL3 | IDL3 (INFLORESCENCE DEFICIENT IN ABSCISSION (IDA)-LIKE 3) | chr5:3047218-3047517 FORWARD

Symbols: SEP1, AGL2 | SEP1 (SEPALLATA1); DNA binding / transcription factor | chr5:5151334-5154154 FORWARD

Symbols: anac095 | anac095 (Arabidopsis NAC domain containing protein 95); transcription factor | chr5:17289100-17289776 REVERSE

Symbols: WPP1 | WPP1 (WPP domain protein 1) | chr5:17289100-17289776 REVERSE

nodulin MtN3 family protein | chr5:20665077-20667304 REVERSE

Symbols: AGL8, FUL | AGL8 (agamous-like 8); transcription factor | chr5:24502482-24506143 REVERSE

embryo-specific protein-related | chr5:24986327-24987489 REVERSE

Symbols: IDL2 | IDL2 (INFLORESCENCE DEFICIENT IN ABSCISSION (IDA)-LIKE 2) | chr5:25850656-25851333 FORWARD

## description

regulator of chromosome condensation (RCC1) family protein | chr3:521794-524631 REVERSE

Symbols: WPP1 | WPP1 (WPP domain protein 1) | chr5:17289100-17289776 REVERSE

regulator of chromosome condensation (RCC1) family protein | chr5:24485655-24487784 REVERSE

description

Symbols: LCR78, PDF1.4 | PDF1.4 | chr1:6781483-6782039 REVERSE

Symbols: ATCLH1, COR11, ATHCOR1 | ATCLH1 (ARABIDOPSIS THALIANA CORONATINE-INDUCED PROTEIN 1); pathogenesis-related thaumatin family protein | chr1:6945425-6947344 FORWARD

ATP binding / protein binding | chr1:21791783-21797050 FORWARD

thionin, putative | chr1:24605671-24606537 REVERSE

thaumatin-like protein, putative / pathogenesis-related protein, putative | chr1:27681408-27683130 FORWARD

pathogenesis-related thaumatin family protein | chr1:29204747-29206217 FORWARD

Symbols: PR1, PR 1, ATPR1 | PR1 (PATHOGENESIS-RELATED GENE 1) | chr2:6241704-6242463 REVERSE

avirulence-responsive family protein / avirulence induced gene (AIG1) family protein | chr4:6234762-6234762 FORWARD

glycosyl hydrolase family 18 protein | chr4:10763934-10765753 REVERSE

glycosyl hydrolase family 18 protein | chr4:10767436-10768614 REVERSE

FUNCTIONS IN: molecular\_function unknown; INVOLVED IN: response to other organism; LOCATED IN: cytoplasm

Symbols: ACD2, ATRCCR | ACD2 (ACCELERATED CELL DEATH 2); red chlorophyll catabolite reductase | chr1:16022753-16024316 REVERSE

Symbols: EDS5, SID1 | EDS5 (ENHANCED DISEASE SUSCEPTIBILITY 5); antiporter/ multidrug efflux pump | chr5:16022753-16024316 REVERSE

pathogenesis-related thaumatin family protein | chr5:16022753-16024316 REVERSE

Symbols: ATPP2-A5 | ATPP2-A5 (ARABIDOPSIS THALIANA PHLOEM PROTEIN 2 A5); carbohydrate binding protein

disease resistance protein (CC-NBS-LRR class), putative / PRM1 homolog, putative | chr1:21780574-21780574 FORWARD

disease resistance-responsive family protein | chr1:24503624-24504193 FORWARD

description

17.8 kDa class I heat shock protein (HSP17.8-CI) | chr1:2274943-2275758 FORWARD

17.4 kDa class III heat shock protein (HSP17.4-CIII) | chr1:20179422-20180281 REVERSE

DNAJ heat shock N-terminal domain-containing protein | chr1:21078820-21080423 REVERSE

DNAJ heat shock N-terminal domain-containing protein | chr1:28944843-28947031 REVERSE

DNAJ heat shock N-terminal domain-containing protein | chr3:23021121-23023332 FORWARD

DNAJ heat shock N-terminal domain-containing protein | chr5:25737071-25738667 REVERSE

description

Symbols: CYCA1;2, CYCA1 | CYCA1;2 (CYCLIN A1;2); cyclin-dependent protein kinase regulator | chr1:2614147-2614147 FORWARD

Symbols: ICK1, KRP1 | ICK1; cyclin-dependent protein kinase inhibitor | chr2:9976746-9978021 REVERSE

Symbols: UVI4, PYM | UVI4 (UV-B-INSENSITIVE 4) | chr2:17601955-17603633 REVERSE

Symbols: CYCD6;1 | CYCD6;1 (CYCLIN D6;1); cyclin-dependent protein kinase | chr4:1432375-1433691 FORWARD

Symbols: CYCD4;1 | CYCD4;1 (CYCLIN D4;1); cyclin-dependent protein kinase regulator | chr5:2614147-2614147 FORWARD

description

Symbols: COR15B | COR15B (COLD REGULATED 15B) | chr2:17709036-17709945 REVERSE

Symbols: COR15A, COR15 | COR15A (COLD-REGULATED 15A) | chr2:17711037-17712092 REVERSE

Symbols: GRP2, CSDP2, CSP2, ATCSP2 | GRP2 (GLYCINE RICH PROTEIN 2); double-stranded DNA binding

Symbols: COR78, LTI78, RD29A, LTI140 | LTI78 (LOW-TEMPERATURE-INDUCED 78) | chr5:21240849-21

description

Symbols: ATDI21, DI21 | ATDI21 (ARABIDOPSIS THALIANA DROUGHT-INDUCED 21) | chr4:9028461-902

description

myosin heavy chain-related | chr1:2001594-2002596 FORWARD

Symbols: AtPP2-A12 | AtPP2-A12 (Phloem protein 2-A12); carbohydrate binding | chr1:4326739-4328

Symbols: VIP1 | VIP1 (VIRE2-INTERACTING PROTEIN 1); protein binding / transcription factor | chr1:16

F-actin capping protein beta subunit family protein | chr1:26996809-26998977 FORWARD

Symbols: SKIP3, AtPP2-B9 | SKIP3 (SKP1 INTERACTING PARTNER 3); carbohydrate binding | chr2:61780

Symbols: ANNAT4 | ANNAT4 (ANNEXIN ARABIDOPSIS 4); calcium ion binding / calcium-dependent pho

Symbols: ANNAT3 | ANNAT3 (ANNEXIN ARABIDOPSIS 3); calcium ion binding / calcium-dependent pho

actin, putative | chr2:17577714-17580392 FORWARD

Symbols: MAP65-4 | MAP65-4 (MICROTUBULE-ASSOCIATED PROTEIN 65-4) | chr3:22477573-2248046:

FUNCTIONS IN: molecular\_function unknown; INVOLVED IN: biological\_process unknown; LOCATED IN

ankyrin repeat family protein | chr4:8289644-8292083 FORWARD

ankyrin repeat family protein | chr4:10471331-10472742 REVERSE

Symbols: KIN2, COR6.6 | KIN2 | chr5:5211911-5212665 FORWARD

dynein light chain, putative | chr5:6791487-6793346 REVERSE

Symbols: AtPP2-A14 | AtPP2-A14 (Phloem protein 2-A14); carbohydrate binding | chr5:21176422-211

ankyrin repeat family protein | chr5:22232195-22232949 REVERSE

Symbols: CIP8 | CIP8 (COP1-INTERACTING PROTEIN 8); protein binding / zinc ion binding | chr5:25943

description

phagocytosis and cell motility protein ELMO1-related | chr1:904319-906013 REVERSE

pseudogene of unknown protein | chr1:1477500-1478821 REVERSE

harpin-induced protein-related / HIN1-related / harpin-responsive protein-related | chr1:2559487-25

unknown protein | chr1:3530467-3531821 FORWARD

unknown protein | chr1:5132535-5133716 REVERSE

protein-protein interaction regulator family protein | chr1:5228336-5231061 REVERSE

other RNA | chr1:5297875-5298166 REVERSE  
VQ motif-containing protein | chr1:7469002-7469721 REVERSE  
Symbols: LYM1 | LYM1 (LYSM DOMAIN GPI-ANCHORED PROTEIN 1 PRECURSOR) | chr1:7680481-76826  
unknown protein | chr1:8712478-8713032 REVERSE  
unknown protein | chr1:10095797-10096374 FORWARD  
Symbols: COR414-TM1 | COR414-TM1 | chr1:10288197-10289621 REVERSE  
Biotin/lipoate A/B protein ligase family; FUNCTIONS IN: octanoyltransferase activity, catalytic activity; l  
membrane trafficking VPS53 family protein | chr1:18896323-18900268 FORWARD  
reticulon family protein (RTNLB14) | chr1:25572185-25572921 FORWARD  
hydrolase, alpha/beta fold family protein | chr1:27341079-27342455 FORWARD  
esterase/lipase/thioesterase family protein | chr1:27931836-27934268 FORWARD  
dolichol phosphate-mannose biosynthesis regulatory protein-related | chr1:27948123-27951668 REVE  
Symbols: CP12-3 | CP12-3 | chr1:28728253-28728853 FORWARD  
peptidoglycan-binding LysM domain-containing protein | chr1:29173457-29175530 FORWARD

#### description

Symbols: AtMC9 | AtMC9 (metacaspase 9); cysteine-type peptidase | chr5:1153790-1155040 FORWAR  
Symbols: SDD1 | SDD1 (STOMATAL DENSITY AND DISTRIBUTION); serine-type endopeptidase | chr1:1C  
Symbols: XCP2 | XCP2 (xylem cysteine peptidase 2); cysteine-type peptidase/ peptidase | chr1:725217  
cysteine proteinase, putative | chr3:17905725-17907561 FORWARD  
cysteine proteinase, putative | chr4:6887254-6889059 FORWARD  
Symbols: XCP1 | XCP1 (XYLEM CYSTEINE PEPTIDASE 1); cysteine-type endopeptidase/ cysteine-type pe  
Symbols: SCPL13 | serine-type carboxypeptidase | chr2:9778877-9783251 FORWARD  
Symbols: SCPL9 | serine carboxypeptidase S10 family protein | chr2:9798843-9802674 FORWARD  
serpin, putative / serine protease inhibitor, putative | chr2:11229087-11230491 REVERSE  
catalytic/ protein binding / serine-type endopeptidase/ serine-type peptidase | chr5:9789899-979229  
AAA-type ATPase family protein | chr3:10685524-10687364 FORWARD  
Symbols: UBQ6 | UBQ6; protein binding | chr2:19344668-19345345 FORWARD  
ubiquitin family protein | chr5:4630997-4631742 FORWARD  
Symbols: UBC5 | UBC5 (ubiquitin-conjugating enzyme 5); ubiquitin-protein ligase | chr1:23667616-236  
Symbols: UBC17 | UBC17 (UBIQUITIN-CONJUGATING ENZYME 17); small conjugating protein ligase/ ub  
zinc finger (C3HC4-type RING finger) family protein | chr1:553181-555854 REVERSE  
zinc finger (C3HC4-type RING finger) family protein | chr1:8484703-8486002 REVERSE  
zinc finger (C3HC4-type RING finger) family protein | chr1:18201889-18202764 FORWARD  
zinc finger (C3HC4-type RING finger) family protein | chr1:18209261-18210128 FORWARD  
zinc finger (C3HC4-type RING finger) family protein | chr1:22242748-22243731 REVERSE  
zinc finger (C3HC4-type RING finger) family protein | chr1:27157875-27159558 FORWARD  
zinc finger (C3HC4-type RING finger) family protein | chr2:14440648-14442005 FORWARD  
zinc finger (C3HC4-type RING finger) family protein | chr2:15764728-15765553 FORWARD



zinc finger (C3HC4-type RING finger) family protein | chr3:3479979-3480455 FORWARD  
zinc finger (C3HC4-type RING finger) family protein | chr3:17178697-17180067 REVERSE  
Symbols: ORL1, VIM6, ORTHL | ORTHL (ORTHRUS-LIKE); ubiquitin-protein ligase/ zinc ion binding | chr4:  
zinc finger (C3HC4-type RING finger) family protein | chr5:206432-208611 FORWARD  
zinc finger (C3HC4-type RING finger) family protein | chr5:338899-340253 FORWARD  
zinc finger (C3HC4-type RING finger) family protein | chr5:375215-377208 FORWARD  
zinc finger (C3HC4-type RING finger) family protein | chr5:5161724-5163030 FORWARD  
zinc finger (C3HC4-type RING finger) family protein | chr5:20167002-20169474 REVERSE  
unknown protein | chr1:3627726-3630765 FORWARD  
kelch repeat-containing F-box family protein | chr1:9336057-9337786 REVERSE  
kelch repeat-containing F-box family protein | chr1:9519108-9520520 FORWARD  
F-box family protein | chr1:11221335-11222786 REVERSE  
Symbols: ATSKP2;2, SKP2B | SKP2B; ubiquitin-protein ligase | chr1:28940750-28942596 FORWARD  
F-box family protein | chr2:7403856-7405219 FORWARD  
F-box family protein | chr2:11683862-11684967 REVERSE  
F-box family protein | chr3:6289227-6290383 REVERSE  
F-box family protein | chr3:8313334-8314422 FORWARD  
kelch repeat-containing F-box family protein | chr3:22142900-22144439 FORWARD  
kelch repeat-containing F-box family protein | chr4:1335729-1337368 REVERSE  
FUNCTIONS IN: molecular\_function unknown; INVOLVED IN: biological\_process unknown; LOCATED IN  
kelch repeat-containing F-box family protein | chr4:18380526-18381905 REVERSE  
kelch repeat-containing F-box family protein | chr4:18389436-18390539 REVERSE  
kelch repeat-containing F-box family protein | chr5:9484734-9486149 REVERSE  
FUNCTIONS IN: molecular\_function unknown; INVOLVED IN: biological\_process unknown; LOCATED IN

#### description

protein kinase family protein | chr1:4572419-4576632 REVERSE  
Symbols: ATMYC2, RD22BP1, JAI1, JIN1, MYC2, ZBF1 | MYC2; DNA binding / transcription activator/ tra  
Symbols: PXMT1 | PXMT1; S-adenosylmethionine-dependent methyltransferase | chr1:24873291-2487  
Symbols: CIPK11, PKS5, SIP4, SNRK3.22 | SIP4 (SOS3-INTERACTING PROTEIN 4); kinase/ protein kinase  
Symbols: MAPKKK17 | MAPKKK17; ATP binding / kinase/ protein kinase/ protein serine/threonine kina  
tyrosine specific protein phosphatase family protein | chr2:13987767-13990976 FORWARD  
protein phosphatase 2C, putative / PP2C, putative | chr3:1640393-1643253 REVERSE  
protein kinase family protein | chr3:21392671-21393744 FORWARD  
protein kinase family protein | chr4:7598093-7599257 REVERSE  
Symbols: CIPK4, SnRK3.3 | CIPK4 (CBL-interacting protein kinase 4); ATP binding / kinase/ protein kinas  
palmitoyl protein thioesterase family protein | chr4:9745006-9746966 REVERSE  
protein phosphatase 2C PPH1 / PP2C PPH1 (PPH1) | chr4:13851862-13854191 REVERSE  
Symbols: RIC7 | RIC7 (ROP-INTERACTIVE CRIB MOTIF-CONTAINING PROTEIN 7); protein binding | chr4:

protein phosphatase 2C, putative / PP2C, putative | chr4:15904444-15906010 REVERSE  
Symbols: MAPKKK19 | MAPKKK19; ATP binding / kinase/ protein kinase/ protein serine/threonine kina

#### description

Symbols: EXO | EXO (EXORDIUM) | chr4:5740297-5741524 FORWARD  
photoassimilate-responsive protein, putative | chr5:21263936-21265264 REVERSE  
leucine-rich repeat transmembrane protein kinase, putative | chr1:24930665-24932918 REVERSE  
leucine-rich repeat family protein / protein kinase family protein | chr3:4988107-4994058 FORWARD  
Symbols: LRR XI-23 | LRR XI-23; ATP binding / kinase/ protein kinase/ protein serine/threonine kinase |  
protein kinase family protein | chr1:29539089-29540709 REVERSE  
LOCATED IN: endomembrane system; CONTAINS InterPro DOMAIN/s: Protein of unknown function DU  
Symbols: RKF3 | RKF3 (RECEPTOR-LIKE KINASE IN IN FLOWERS 3); kinase/ receptor signaling protein sei  
Symbols: WAK3 | WAK3 (wall associated kinase 3); kinase/ protein serine/threonine kinase | chr1:7434  
protein kinase family protein | chr1:12064509-12066376 FORWARD  
leucine-rich repeat protein kinase, putative | chr1:19237407-19241883 REVERSE  
Symbols: AtRLP24 | AtRLP24 (Receptor Like Protein 24); kinase/ protein binding | chr2:14013874-1401  
protein kinase-related | chr3:17005483-17008424 REVERSE  
protein kinase family protein | chr4:6441673-6443435 REVERSE  
Symbols: TSA1 | TSA1 (TSK-ASSOCIATING PROTEIN 1); calcium ion binding / protein binding | chr1:195  
Symbols: RD20 | RD20 (RESPONSIVE TO DESSICATION 20); calcium ion binding | chr2:14144831-14146  
calcium-binding EF hand family protein | chr3:11005779-11006414 FORWARD  
calmodulin-binding family protein | chr3:19593173-19595822 REVERSE  
Symbols: CML39, CML37 | CML37 (CALMODULIN LIKE 37); calcium ion binding | chr5:16942576-16943  
Symbols: PBP1 | PBP1 (PINOID-BINDING PROTEIN 1); calcium ion binding / protein binding | chr5:2212  
Symbols: BON1, CPN1, BON | BON1 (BONZAI 1); calcium-dependent phospholipid binding | chr5:2485  
Symbols: ATBAG7 | ATBAG7 (ARABIDOPSIS THALIANA BCL-2-ASSOCIATED ATHANOGENE 7); calmodulir  
Symbols: PIP5K5 | PIP5K5 (PHOSPHATIDYLINOSITOL- 4-PHOSPHATE 5-KINASE 5); 1-phosphatidylinosito  
Symbols: ATROPGEF11, ROPGEF11 | ROPGEF11 (RHO GUANYL-NUCLEOTIDE EXCHANGE FACTOR 11); R  
Symbols: ATRAB18C, ATRABC2B | ATRABC2B (ARABIDOPSIS RAB GTPASE HOMOLOG C2B); ATP binding  
Symbols: PRN, PRN1, ATPIRIN1 | PRN (PIRIN); calmodulin binding | chr3:21894134-21895623 FORWAR  
nucleotide binding | chr4:15920230-15922658 FORWARD  
Symbols: PRA1.G2 | PRA1.G2 (PRENYLATED RAB ACCEPTOR 1.G2) | chr5:22758768-22759371 REVERSE  
protein kinase, putative | chr4:12080060-12084256 FORWARD  
Symbols: FHL | FHL (FAR-RED-ELONGATED HYPOCOTYL1-LIKE); protein binding | chr5:437460-438894 I  
phototropic-responsive NPH3 family protein | chr5:19353676-19356300 FORWARD

description

small nuclear ribonucleoprotein, putative / snRNP, putative / Sm protein, putative | chr1:6608115-6608115  
Symbols: PAB6 | PAB6 (POLY(A) BINDING PROTEIN 6); RNA binding / translation initiation factor | chr3:21004259-21004259  
Symbols: U2.6 | U2.6; snRNA | chr3:21004259-21004809 FORWARD  
splicing factor Prp18 family protein | chr1:754371-756303 REVERSE  
Symbols: ATU2AF35A | ATU2AF35A; RNA binding / nucleic acid binding / nucleotide binding / zinc ion binding | chr2:15306654-15306654  
Symbols: RSZ33, ATRSZ33 | RSZ33; nucleic acid binding / nucleotide binding / zinc ion binding | chr2:15306654-15306654  
Symbols: SCL30 | SCL30; RNA binding / nucleic acid binding / nucleotide binding | chr3:20560808-20560808  
Symbols: SRZ-22, SRZ22, RSZP22 | SRZ-22; protein binding | chr4:15306654-15308347 FORWARD  
Symbols: ATU2AF35B, U2AF35B | U2AF35B; RNA binding / nucleic acid binding / nucleotide binding / zinc ion binding  
RNA helicase, putative | chr4:9388071-9390774 REVERSE  
polyadenylate-binding protein family protein / PABP family protein | chr5:3255434-3257807 REVERSE  
polyadenylate-binding protein family protein / PABP family protein | chr5:26080231-26083017 REVERSE  
Symbols: RNS3 | RNS3 (RIBONUCLEASE 3); RNA binding / endoribonuclease/ ribonuclease T2 | chr1:92111824-92111824  
Symbols: RNS1, ATRNS1 | RNS1 (RIBONUCLEASE 1); endoribonuclease/ ribonuclease | chr2:873506-873506  
endoribonuclease L-PSP family protein | chr3:7109949-7111824 REVERSE

description

Symbols: PTAC6 | PTAC6 (PLASTID TRANSCRIPTIONALLY ACTIVE6) | chr1:7571185-7573846 REVERSE  
Bola-like family protein | chr5:3057646-3058821 REVERSE  
DNA-binding protein, putative | chr2:15148259-15151575 REVERSE  
Symbols: AL4 | AL4 (ALFIN-LIKE 4); DNA binding / methylated histone residue binding | chr5:9158318-9158318  
Symbols: RAP2.6 | RAP2.6 (related to AP2 6); DNA binding / transcription factor | chr1:16263813-16263813  
Symbols: RAP2.1 | RAP2.1 (related to AP2 1); DNA binding / transcription factor | chr1:17265701-17265701  
Symbols: ORA47 | ORA47; DNA binding / transcription factor | chr1:28144132-28145049 FORWARD  
AP2 domain-containing transcription factor | chr2:9443128-9444423 REVERSE  
AP2 domain-containing transcription factor, putative | chr2:9937998-9938875 FORWARD  
AP2 domain-containing transcription factor family protein | chr2:14258509-14260733 REVERSE  
Symbols: RAP2.9 | RAP2.9 (related to AP2 9); DNA binding / transcription factor | chr4:4073962-40745  
Symbols: RAP2.10 | RAP2.10 (related to AP2 10); DNA binding / transcription factor | chr4:17388814-17388814  
Symbols: Rap2.6L | Rap2.6L (related to AP2 6L); DNA binding / transcription factor | chr5:4272060-4272060  
transcription factor | chr1:3493940-3495144 REVERSE  
DNA binding / transcription factor | chr1:3506186-3509006 FORWARD  
basic helix-loop-helix (bHLH) family protein | chr1:13039916-13042102 FORWARD  
Symbols: PIL1 | PIL1 (PHYTOCHROME INTERACTING FACTOR 3-LIKE 1); transcription factor | chr2:19291929  
transcription factor | chr3:1727306-1728296 FORWARD  
Symbols: MUTE | MUTE (MUTE); DNA binding / transcription factor | chr3:1846531-1848230 FORWARD  
Symbols: SPCH | SPCH (SPEECHLESS); DNA binding / transcription factor | chr5:21586606-21588941 REVERSE

zinc finger (B-box type) family protein | chr1:8933716-8935460 REVERSE  
zinc finger (B-box type) family protein | chr1:9775528-9777810 REVERSE  
zinc finger (B-box type) family protein | chr1:25709114-25710907 REVERSE  
Symbols: ATCOL4, COL4 | zinc finger (B-box type) family protein | chr5:8589234-8591236 FORWARD  
Dof-type zinc finger domain-containing protein | chr1:17525365-17526306 FORWARD  
Dof-type zinc finger domain-containing protein | chr5:539249-541112 REVERSE  
Symbols: OBP4 | OBP4; DNA binding / transcription factor | chr5:24480449-24481873 FORWARD  
transcription factor | chr2:7982868-7984096 REVERSE  
zinc finger (GATA type) family protein | chr4:17268906-17269743 REVERSE  
zinc finger (CCCH-type) family protein | chr1:10344046-10345651 FORWARD  
zinc finger (C2H2 type) family protein (ZAT11) | chr2:15706357-15707224 FORWARD  
zinc finger (C2H2 type) family protein | chr5:880225-881305 FORWARD  
Symbols: C2H2, CZF2, ZAT6 | ZAT6 (ZINC FINGER OF ARABIDOPSIS THALIANA 6); nucleic acid binding / t  
Symbols: AZF3 | AZF3 (ARABIDOPSIS ZINC-FINGER PROTEIN 3); DNA binding / nucleic acid binding / tra  
Symbols: AZF1 | AZF1 (ARABIDOPSIS ZINC-FINGER PROTEIN 1); DNA binding / nucleic acid binding / tra  
RNA recognition motif (RRM)-containing protein | chr3:17351141-17352822 REVERSE  
Symbols: NF-YB11 | NF-YB11 (NUCLEAR FACTOR Y, SUBUNIT B11); transcription factor | chr2:1174498:  
Symbols: PCL1, LUX | PCL1 (PHYTOCLOCK 1); DNA binding / transcription factor | chr3:17183090-1718:  
myb family transcription factor | chr5:2103162-2105898 FORWARD  
Symbols: RGL3 | RGL3 (RGA-LIKE PROTEIN 3); transcription factor | chr5:5764063-5766077 REVERSE  
Homeobox-leucine zipper protein family; FUNCTIONS IN: sequence-specific DNA binding, transcription  
Symbols: HAT9 | HAT9; DNA binding / transcription factor | chr2:9704706-9706150 REVERSE  
transposable element gene | chr3:5814748-5816592 FORWARD  
Symbols: WOX1 | WOX1 (WUSCHEL related homeobox 1); transcription factor | chr3:6161137-616327  
Symbols: SEP3, AGL9 | SEP3 (SEPALLATA3); DNA binding / protein binding / transcription factor | chr1:  
unknown protein | chr1:22061083-22061481 REVERSE  
Symbols: SEP1, AGL2 | SEP1 (SEPALLATA1); DNA binding / transcription factor | chr5:5151334-515415:  
Symbols: AGL62 | AGL62 (Agamous-like 62); DNA binding / transcription factor | chr5:24306294-24307  
Symbols: AGL31, MAF2 | AGL31 (AGAMOUS LIKE MADS-BOX PROTEIN 31); transcription factor | chr5:2  
Symbols: AtMYB47 | AtMYB47 (myb domain protein 47); DNA binding / transcription factor | chr1:645  
Symbols: MYB95, ATMYB95, ATMYBCP66 | MYB95 (myb domain protein 95); DNA binding / transcripti  
myb family transcription factor / ELM2 domain-containing protein | chr2:1045456-1047684 REVERSE  
Symbols: AtMYB70 | AtMYB70 (myb domain protein 70); DNA binding / transcription factor | chr2:990  
Symbols: ATMYB2, MYB2 | MYB2 (MYB DOMAIN PROTEIN 2); DNA binding / calmodulin binding / trans  
Symbols: MYB15, ATY19, ATMYB15 | MYB15 (MYB DOMAIN PROTEIN 15); DNA binding / transcription  
Symbols: MYB111, ATMYB48, PFG3, ATMYB48-3 | MYB111 (MYB DOMAIN PROTEIN 111); DNA binding  
Symbols: MYB29, ATMYB29, PMG2 | ATMYB29 (ARABIDOPSIS THALIANA MYB DOMAIN PROTEIN 29); L  
Symbols: MYB76, AtMYB76 | MYB76 (myb domain protein 76); DNA binding / transcription factor | chi  
Symbols: MYB59, ATMYB59-3 | MYB59 (MYB DOMAIN PROTEIN 59); DNA binding / transcription factor  
Symbols: ATMYBR1, ATMYB44, MYBR1 | MYBR1 (MYB DOMAIN PROTEIN R1); DNA binding / transcript  
Symbols: ETC1 | ETC1 (ENHANCER OF TRY AND CPC 1); DNA binding / transcription factor | chr1:14715

Symbols: ATRL3 | ATRL3 (ARABIDOPSIS RAD-LIKE 3); DNA binding / transcription factor | chr4:1725466  
Symbols: anac045 | anac045 (Arabidopsis NAC domain containing protein 45); transcription factor | ch  
Symbols: ATNAC3, ANAC055 | ANAC055 (ARABIDOPSIS NAC DOMAIN CONTAINING PROTEIN 55); trans  
TCP family transcription factor, putative | chr2:18820242-18821889 REVERSE  
Symbols: ASIL1 | ASIL1 (ARABIDOPSIS 6B-INTERACTING PROTEIN 1-LIKE 1); sequence-specific DNA bind  
DNA-binding protein-related | chr2:16018357-16019500 FORWARD  
transcription factor | chr2:18437333-18438565 REVERSE  
transcription factor | chr3:3096415-3098071 REVERSE  
transcription factor | chr3:3476187-3477405 REVERSE  
transcription factor | chr3:4707113-4708848 REVERSE  
hydroxyproline-rich glycoprotein family protein | chr3:9073623-9074682 FORWARD  
glycine-rich protein | chr4:14307249-14307973 FORWARD  
transcription factor | chr4:15183188-15184961 REVERSE  
transcription factor | chr5:1639032-1640606 REVERSE  
Symbols: WRKY63, ATWRKY63 | WRKY63; transcription factor | chr1:24848320-24849364 FORWARD  
Symbols: WRKY45, ATWRKY45 | WRKY45; transcription factor | chr3:326397-327412 REVERSE  
Symbols: WRKY69, ATWRKY69 | WRKY69; transcription factor | chr3:21715007-21716916 FORWARD  
Symbols: WRKY29, ATWRKY29 | WRKY29; transcription factor | chr4:12291820-12293096 FORWARD  
Symbols: WRKY13, ATWRKY13 | WRKY13; transcription factor | chr4:18332878-18334789 REVERSE  
Symbols: WRKY30, ATWRKY30 | WRKY30; transcription factor | chr5:8153115-8154709 REVERSE  
Symbols: EEL, ATBZIP12, DPBF4 | EEL (ENHANCED EM LEVEL); DNA binding / transcription factor | chr2  
Symbols: GBF3 | GBF3 (G-BOX BINDING FACTOR 3); sequence-specific DNA binding / transcription fact  
Symbols: LBD41 | LBD41 (LOB DOMAIN-CONTAINING PROTEIN 41) | chr3:536505-537998 REVERSE  
Symbols: ELF3, PYK20 | ELF3 (EARLY FLOWERING 3); protein C-terminus binding / transcription factor |  
Symbols: TAF14 | TAF14 (TBP-associated factor 14) | chr2:7829035-7830059 FORWARD  
Symbols: HDA08, HDA8, ATHDA8 | HDA08; histone deacetylase | chr1:2672451-2674628 FORWARD  
Symbols: MBD8 | MBD8; methyl-CpG binding | chr1:7881537-7883742 REVERSE  
Symbols: MBD11, ATMBD11 | MBD11; DNA binding / methyl-CpG binding | chr3:5343016-5344700 FO  
RWP-RK domain-containing protein | chr1:27993032-27994178 REVERSE  
Symbols: PUB22 | PUB22 (PLANT U-BOX 22); ubiquitin-protein ligase | chr3:19440739-19442383 REVE  
nucleic acid binding | chr1:7004879-7007651 REVERSE  
Remorin family protein; CONTAINS InterPro DOMAIN/s: Remorin, C-terminal (InterPro:IPR005516); BE

#### description

unknown protein | chr1:99922-101834 FORWARD  
FUNCTIONS IN: molecular\_function unknown; INVOLVED IN: biological\_process unknown; LOCATED IN  
unknown protein | chr1:773411-775344 FORWARD  
nucleic acid binding / ribonuclease H | chr1:3263877-3264788 REVERSE  
FUNCTIONS IN: molecular\_function unknown; INVOLVED IN: biological\_process unknown; LOCATED IN

unknown protein | chr1:3670278-3671187 REVERSE  
unknown protein | chr1:3740765-3744675 FORWARD  
unknown protein | chr1:3832623-3834191 FORWARD  
FUNCTIONS IN: molecular\_function unknown; INVOLVED IN: biological\_process unknown; LOCATED IN  
unknown protein | chr1:3870833-3871570 FORWARD  
unknown protein | chr1:3945737-3946613 FORWARD  
unknown protein | chr1:4378939-4379516 REVERSE  
unknown protein | chr1:4794756-4796594 FORWARD  
unknown protein | chr1:5242198-5243227 REVERSE  
The protein encoded by this gene was identified as a part of pollen proteome by mass spec analysis. It  
unknown protein | chr1:5448726-5450177 FORWARD  
unknown protein | chr1:5639032-5640173 FORWARD  
unknown protein | chr1:5786560-5787112 REVERSE  
Symbols: JAZ5, TIFY11A | JAZ5 (JASMONATE-ZIM-DOMAIN PROTEIN 5) | chr1:5955488-5957212 REVER  
unknown protein | chr1:6135803-6138432 REVERSE  
unknown protein | chr1:6282252-6283293 REVERSE  
unknown protein | chr1:6710961-6711787 FORWARD  
FUNCTIONS IN: molecular\_function unknown; INVOLVED IN: biological\_process unknown; LOCATED IN  
unknown protein | chr1:7106922-7107617 REVERSE  
pseudogene of unknown protein | chr1:7537087-7537649 REVERSE  
unknown protein | chr1:8911130-8912398 REVERSE  
unknown protein | chr1:9067039-9068207 FORWARD  
Symbols: KDR | KDR (KIDARI); transcription regulator | chr1:9351454-9352761 FORWARD  
binding | chr1:9412820-9417504 REVERSE  
unknown protein | chr1:9483157-9484368 FORWARD  
INVOLVED IN: biological\_process unknown; LOCATED IN: cellular\_component unknown; EXPRESSED IN  
unknown protein | chr1:9846884-9847923 REVERSE  
nucleic acid binding / zinc ion binding | chr1:10332371-10335694 FORWARD  
unknown protein | chr1:10355703-10356482 REVERSE  
unknown protein | chr1:10993195-10994125 REVERSE  
DNA binding | chr1:11163858-11164928 REVERSE  
INVOLVED IN: N-terminal protein myristoylation; LOCATED IN: plasma membrane; EXPRESSED IN: 14 p  
unknown protein | chr1:11797335-11798602 FORWARD  
Leucine-rich repeat (LRR) family protein; LOCATED IN: endomembrane system; CONTAINS InterPro DO  
FUNCTIONS IN: molecular\_function unknown; INVOLVED IN: biological\_process unknown; LOCATED IN  
unknown protein | chr1:12514106-12516521 REVERSE  
unknown protein | chr1:14293064-14296191 REVERSE  
transposable element gene | chr1:16470872-16471248 FORWARD  
Symbols: TED6 | TED6 (TRACHEARY ELEMENT DIFFERENTIATION-RELATED 6) | chr1:16575895-1657641  
unknown protein | chr1:17154921-17159397 REVERSE  
unknown protein | chr1:17687269-17688816 FORWARD

unknown protein | chr1:17847356-17848564 FORWARD  
unknown protein | chr1:18310494-18311634 FORWARD  
unknown protein | chr1:18388792-18390496 REVERSE  
unknown protein | chr1:19418306-19419853 FORWARD  
unknown protein | chr1:19579886-19580686 REVERSE  
unknown protein | chr1:19706085-19706706 FORWARD  
Symbols: ATMRD1, MRD1 | unknown protein | chr1:19963214-19964712 REVERSE  
unknown protein | chr1:20014410-20014923 REVERSE  
unknown protein | chr1:20122426-20122866 REVERSE  
unknown protein | chr1:20207020-20207540 FORWARD  
unknown protein | chr1:20617313-20618005 FORWARD  
Symbols: NDF5 | carbohydrate binding / catalytic | chr1:20674783-20676351 FORWARD  
unknown protein | chr1:21191121-21192217 REVERSE  
unknown protein | chr1:21580417-21580641 REVERSE  
Symbols: MEE9 | MEE9 (maternal effect embryo arrest 9) | chr1:22409472-22410654 FORWARD  
unknown protein | chr1:22729816-22731182 FORWARD  
FUNCTIONS IN: molecular\_function unknown; INVOLVED IN: biological\_process unknown; LOCATED IN  
pseudogene of S-adenosylmethionine-dependent methyltransferase/rRNA (adenine-N6,N6-)-dimethyl-  
Unknown gene | chr1:23984011-23984795 FORWARD  
unknown protein | chr1:24036021-24037401 FORWARD  
unknown protein | chr1:24038034-24039177 FORWARD  
FUNCTIONS IN: molecular\_function unknown; INVOLVED IN: biological\_process unknown; LOCATED IN  
FUNCTIONS IN: molecular\_function unknown; INVOLVED IN: biological\_process unknown; LOCATED IN  
FUNCTIONS IN: molecular\_function unknown; INVOLVED IN: biological\_process unknown; EXPRESSED I  
unknown protein | chr1:25614197-25615403 REVERSE  
unknown protein | chr1:25711869-25712238 REVERSE  
unknown protein | chr1:25892086-25892798 FORWARD  
Symbols: AFP1 | AFP1 (ABI FIVE BINDING PROTEIN) | chr1:26039048-26040720 FORWARD  
unknown protein | chr1:26072284-26076254 REVERSE  
Symbols: JAZ9, TIFY7 | TIFY7 | chr1:26654768-26657064 FORWARD  
unknown protein | chr1:26789236-26790160 REVERSE  
unknown protein | chr1:26809841-26811842 REVERSE  
unknown protein | chr1:27528052-27530946 REVERSE  
unknown protein | chr1:27849230-27849812 FORWARD  
unknown protein | chr1:28219382-28220227 FORWARD  
unknown protein | chr1:28274588-28275990 FORWARD  
unknown protein | chr1:28593250-28594742 FORWARD  
FUNCTIONS IN: molecular\_function unknown; INVOLVED IN: biological\_process unknown; LOCATED IN  
unknown protein | chr1:30014361-30015078 FORWARD  
unknown protein | chr1:30139101-30140204 FORWARD  
unknown protein | chr1:30397128-30398210 FORWARD

unknown protein | chr2:6571-6672 FORWARD  
FUNCTIONS IN: molecular\_function unknown; INVOLVED IN: biological\_process unknown; LOCATED IN  
unknown protein | chr2:332194-332781 REVERSE  
unknown protein | chr2:421624-422626 REVERSE  
FUNCTIONS IN: molecular\_function unknown; INVOLVED IN: biological\_process unknown; LOCATED IN  
unknown protein | chr2:1933272-1934212 REVERSE  
transposable element gene | chr2:2297816-2298721 FORWARD  
unknown protein | chr2:3246037-3246366 REVERSE  
unknown protein | chr2:4304947-4305887 REVERSE  
unknown protein | chr2:4805684-4807310 REVERSE  
unknown protein | chr2:5049953-5050087 REVERSE  
unknown protein | chr2:6947309-6947688 FORWARD  
unknown protein | chr2:7545538-7546374 REVERSE  
unknown protein | chr2:7573835-7575939 REVERSE  
unknown protein | chr2:7584505-7588008 REVERSE  
LOCATED IN: cellular\_component unknown; EXPRESSED IN: 23 plant structures; EXPRESSED DURING: 1  
unknown protein | chr2:8830565-8831533 REVERSE  
Symbols: EPF1 | EPF1 (EPIDERMAL PATTERNING FACTOR 1) | chr2:8983074-8983612 REVERSE  
unknown protein | chr2:9386516-9388183 FORWARD  
unknown protein | chr2:9695932-9696909 FORWARD  
unknown protein | chr2:10906428-10907288 FORWARD  
FUNCTIONS IN: molecular\_function unknown; INVOLVED IN: biological\_process unknown; LOCATED IN  
FUNCTIONS IN: molecular\_function unknown; INVOLVED IN: biological\_process unknown; LOCATED IN  
LOCATED IN: chloroplast; EXPRESSED IN: 21 plant structures; EXPRESSED DURING: 13 growth stages; C  
unknown protein | chr2:13580600-13581112 FORWARD  
unknown protein | chr2:13581581-13582126 FORWARD  
unknown protein | chr2:14152706-14154530 REVERSE  
unknown protein | chr2:14324309-14325192 REVERSE  
unknown protein | chr2:14387421-14390230 REVERSE  
Symbols: JAZ7, TIFY5B | JAZ7 (JASMONATE-ZIM-DOMAIN PROTEIN 7) | chr2:14573080-14573856 FORV  
unknown protein | chr2:14783291-14784710 FORWARD  
unknown protein | chr2:15286498-15288990 FORWARD  
unknown protein | chr2:15554917-15556831 REVERSE  
unknown protein | chr2:15686758-15688003 FORWARD  
FUNCTIONS IN: molecular\_function unknown; INVOLVED IN: biological\_process unknown; EXPRESSED I  
unknown protein | chr2:16224072-16225296 FORWARD  
unknown protein | chr2:16541084-16543338 FORWARD  
transferase, transferring glycosyl groups | chr2:17360491-17362535 FORWARD  
unknown protein | chr2:17428098-17428812 FORWARD  
FUNCTIONS IN: molecular\_function unknown; INVOLVED IN: biological\_process unknown; EXPRESSED I  
Symbols: LSH10 | LSH10 (LIGHT SENSITIVE HYPOCOTYLS 10) | chr2:17747917-17750440 FORWARD



Symbols: CPuORF17 | CPuORF17 (Conserved peptide upstream open reading frame 17) | chr2:1789151  
Symbols: ARL | ARL (ARGOS-LIKE) | chr2:18237152-18238173 FORWARD  
unknown protein | chr2:18382070-18383513 FORWARD  
FUNCTIONS IN: molecular\_function unknown; INVOLVED IN: biological\_process unknown; LOCATED IN  
unknown protein | chr2:18755045-18756302 REVERSE  
unknown protein | chr2:18921024-18922179 REVERSE  
unknown protein | chr2:19148730-19150995 FORWARD  
unknown protein | chr2:19485875-19486553 FORWARD  
FUNCTIONS IN: molecular\_function unknown; INVOLVED IN: biological\_process unknown; LOCATED IN  
unknown protein | chr3:324581-325087 REVERSE  
unknown protein | chr3:488780-489471 FORWARD  
INVOLVED IN: biological\_process unknown; LOCATED IN: cellular\_component unknown; CONTAINS Int  
FUNCTIONS IN: molecular\_function unknown; INVOLVED IN: biological\_process unknown; LOCATED IN  
unknown protein | chr3:822937-824546 REVERSE  
unknown protein | chr3:1347646-1349202 FORWARD  
Encodes a defensin-like (DEFL) family protein. | chr3:1693552-1694138 FORWARD  
unknown protein | chr3:1823099-1824216 REVERSE  
unknown protein | chr3:2167730-2169222 FORWARD  
nucleic acid binding | chr3:2223001-2225254 REVERSE  
unknown protein | chr3:2807667-2808268 REVERSE  
unknown protein | chr3:3069231-3071429 FORWARD  
unknown protein | chr3:3645022-3647542 REVERSE  
3'-5' exonuclease/ nucleic acid binding | chr3:3954695-3955423 REVERSE  
unknown protein | chr3:4392956-4393961 REVERSE  
unknown protein | chr3:4710483-4711969 FORWARD  
unknown protein | chr3:4851696-4851812 FORWARD  
unknown protein | chr3:5045110-5045328 FORWARD  
unknown protein | chr3:5258876-5259082 FORWARD  
unknown protein | chr3:5451864-5452316 REVERSE  
unknown protein | chr3:5676829-5677921 FORWARD  
unknown protein | chr3:5681419-5682331 FORWARD  
unknown protein | chr3:5852152-5853080 FORWARD  
FUNCTIONS IN: molecular\_function unknown; INVOLVED IN: biological\_process unknown; LOCATED IN  
unknown protein | chr3:6479688-6480378 FORWARD  
FUNCTIONS IN: molecular\_function unknown; INVOLVED IN: biological\_process unknown; LOCATED IN  
unknown protein | chr3:6825521-6826006 REVERSE  
unknown protein | chr3:6965647-6967248 FORWARD  
unknown protein | chr3:7591483-7592322 REVERSE  
unknown protein | chr3:8410433-8412193 FORWARD  
unknown protein | chr3:8646892-8647908 FORWARD  
FUNCTIONS IN: molecular\_function unknown; INVOLVED IN: biological\_process unknown; LOCATED IN

unknown protein | chr3:8952006-8952572 FORWARD  
FUNCTIONS IN: molecular\_function unknown; INVOLVED IN: biological\_process unknown; LOCATED IN

unknown protein | chr3:9276845-9278629 FORWARD  
unknown protein | chr3:9463316-9464283 REVERSE  
unknown protein | chr3:9676982-9679900 FORWARD  
unknown protein | chr3:9972508-9974225 REVERSE  
FUNCTIONS IN: molecular\_function unknown; INVOLVED IN: biological\_process unknown; EXPRESSED I

unknown protein | chr3:10045186-10047343 REVERSE  
unknown protein | chr3:10061545-10062731 FORWARD  
transcription regulator | chr3:10855632-10856624 REVERSE  
Symbols: AFP3 | AFP3 (ABI FIVE BINDING PROTEIN 3) | chr3:11382214-11384004 REVERSE  
unknown protein | chr3:11452942-11453037 REVERSE  
unknown protein | chr3:17650260-17651765 REVERSE  
unknown protein | chr3:17707918-17708909 REVERSE  
unknown protein | chr3:17772057-17774739 FORWARD  
unknown protein | chr3:19273494-19275269 REVERSE  
unknown protein | chr3:19312718-19313224 FORWARD  
unknown protein | chr3:19323332-19323827 FORWARD  
unknown protein | chr3:19323772-19325668 REVERSE  
Overexpression leads to PEL (Pseudo-Etiolation in Light) phenotype. | chr3:20473541-20474763 REVEF  
Symbols: ESK1 | ESK1 (ESKIMO 1) | chr3:20780315-20783233 FORWARD  
unknown protein | chr3:20896481-20897593 FORWARD  
Symbols: ARGOS | ARGOS (AUXIN-REGULATED GENE INVOLVED IN ORGAN SIZE) | chr3:22129726-2213  
unknown protein | chr3:22281916-22282017 REVERSE  
FUNCTIONS IN: molecular\_function unknown; INVOLVED IN: biological\_process unknown; LOCATED IN  
unknown protein | chr3:22922550-22922940 FORWARD  
unknown protein | chr3:22932496-22933362 REVERSE  
unknown protein | chr3:23333513-23334034 REVERSE  
Unknown gene | chr3:23459182-23459800 REVERSE  
unknown protein | chr4:466391-468294 REVERSE  
unknown protein | chr4:711192-712643 REVERSE  
unknown protein | chr4:1119849-1119989 REVERSE  
unknown protein | chr4:2327044-2328264 REVERSE  
unknown protein | chr4:2506163-2506786 FORWARD  
unknown protein.  
unknown protein | chr4:5448133-5448523 FORWARD  
FUNCTIONS IN: molecular\_function unknown; INVOLVED IN: biological\_process unknown; LOCATED IN  
unknown protein | chr4:6872151-6873541 REVERSE  
FUNCTIONS IN: molecular\_function unknown; INVOLVED IN: biological\_process unknown; LOCATED IN  
unknown protein | chr4:7594944-7595463 REVERSE  
Symbols: CLE44 | CLE44 (CLAVATA3/ESR-RELATED 44) | chr4:7662371-7663177 REVERSE

unknown protein | chr4:7753311-7754086 FORWARD  
Symbols: SMAP1 | SMAP1 (SMALL ACIDIC PROTEIN 1) | chr4:7864394-7864924 FORWARD  
unknown protein | chr4:7866719-7868742 FORWARD  
unknown protein | chr4:7869874-7870750 FORWARD  
Protein containing PAM2 motif which mediates interaction with the PABC domain of polyadenyl bindir  
pseudogene, hypothetical protein, similar to putative reverse transcriptase | chr4:8458474-8458755 R  
unknown protein | chr4:9179244-9179833 REVERSE  
unknown protein | chr4:9192336-9192568 REVERSE  
unknown protein | chr4:9311355-9315813 FORWARD  
unknown protein | chr4:9749728-9751709 REVERSE  
unknown protein | chr4:9924698-9926372 REVERSE  
binding | chr4:9965742-9966969 FORWARD  
unknown protein | chr4:10181334-10182140 REVERSE  
unknown protein | chr4:10209174-10209733 FORWARD  
FUNCTIONS IN: molecular\_function unknown; INVOLVED IN: biological\_process unknown; LOCATED IN  
unknown protein | chr4:10598445-10599151 REVERSE  
unknown protein | chr4:11545926-11546434 FORWARD  
unknown protein | chr4:11636084-11636473 REVERSE  
unknown protein | chr4:12414230-12415049 FORWARD  
unknown protein | chr4:12519932-12520813 REVERSE  
unknown protein | chr4:13090209-13091798 REVERSE  
other RNA | chr4:13293941-13296465 FORWARD  
unknown protein | chr4:13813044-13813516 FORWARD  
unknown protein | chr4:13933232-13935315 REVERSE  
unknown protein | chr4:13960032-13960483 FORWARD  
unknown protein | chr4:14011844-14012583 REVERSE  
unknown protein | chr4:14713518-14713661 REVERSE  
unknown protein | chr4:14806345-14807425 FORWARD  
unknown protein | chr4:15202296-15203431 FORWARD  
unknown protein | chr4:15276180-15277219 REVERSE  
EXPRESSED IN: 22 plant structures; EXPRESSED DURING: 13 growth stages; BEST Arabidopsis thaliana p  
unknown protein | chr4:16135400-16135914 FORWARD  
Symbols: MAPKKK21 | MAPKKK21; ATP binding / protein kinase/ protein serine/threonine kinase | chr  
unknown protein | chr4:17433643-17437069 REVERSE  
FUNCTIONS IN: molecular\_function unknown; INVOLVED IN: biological\_process unknown; LOCATED IN  
unknown protein | chr4:17936921-17938728 REVERSE  
unknown protein | chr5:5256-5891 REVERSE  
unknown protein | chr5:412031-412698 REVERSE  
unknown protein | chr5:573054-573558 REVERSE  
FUNCTIONS IN: molecular\_function unknown; INVOLVED IN: biological\_process unknown; LOCATED IN  
unknown protein | chr5:762787-763321 REVERSE

FUNCTIONS IN: molecular\_function unknown; INVOLVED IN: biological\_process unknown; LOCATED IN  
unknown protein | chr5:1557037-1557998 REVERSE  
DNA binding | chr5:1576982-1578754 REVERSE  
unknown protein | chr5:1757098-1760666 REVERSE  
unknown protein | chr5:1876034-1876637 REVERSE  
unknown protein | chr5:1884928-1887121 REVERSE  
Symbols: CPuORF21 | CPuORF21 (Conserved peptide upstream open reading frame 21) | chr5:299591  
unknown protein | chr5:3058997-3061970 FORWARD  
unknown protein | chr5:3241518-3242266 REVERSE  
FUNCTIONS IN: molecular\_function unknown; INVOLVED IN: biological\_process unknown; LOCATED IN  
unknown protein | chr5:4234486-4235346 FORWARD  
unknown protein | chr5:4263493-4265337 FORWARD  
unknown protein | chr5:4277939-4279446 REVERSE  
unknown protein | chr5:4442014-4444935 FORWARD  
unknown protein | chr5:4553964-4554176 REVERSE  
FUNCTIONS IN: molecular\_function unknown; INVOLVED IN: biological\_process unknown; LOCATED IN  
unknown protein | chr5:4646781-4647444 REVERSE  
unknown protein | chr5:4898737-4900581 FORWARD  
unknown protein | chr5:5260604-5262840 REVERSE  
unknown protein | chr5:5572576-5573070 FORWARD  
FUNCTIONS IN: molecular\_function unknown; INVOLVED IN: biological\_process unknown; LOCATED IN  
unknown protein | chr5:5978678-5980376 FORWARD  
unknown protein | chr5:6310064-6310846 FORWARD  
unknown protein | chr5:6470129-6471062 FORWARD  
unknown protein | chr5:6718341-6718995 FORWARD  
unknown protein | chr5:6740777-6743773 REVERSE  
unknown protein | chr5:6797440-6798899 FORWARD  
unknown protein | chr5:6993114-6993873 REVERSE  
ubiquitin thiolesterase | chr5:7261600-7263513 FORWARD  
unknown protein | chr5:7433790-7434935 FORWARD  
unknown protein | chr5:7483253-7483811 FORWARD  
unknown protein | chr5:7668229-7669315 REVERSE  
other RNA | chr5:7794142-7795010 FORWARD  
FUNCTIONS IN: molecular\_function unknown; INVOLVED IN: biological\_process unknown; LOCATED IN  
Symbols: LSU4 | LSU4 (RESPONSE TO LOW SULFUR 4) | chr5:8440694-8441218 REVERSE  
other RNA | chr5:8468331-8469262 REVERSE  
unknown protein | chr5:8723958-8725771 FORWARD  
FUNCTIONS IN: molecular\_function unknown; INVOLVED IN: biological\_process unknown; LOCATED IN  
unknown protein | chr5:9874824-9876464 REVERSE  
transposable element gene | chr5:12971144-12973180 FORWARD  
other RNA | chr5:13085037-13086565 FORWARD

Symbols: WSD1 | WSD1; diacylglycerol O-acyltransferase/ long-chain-alcohol O-fatty-acyltransferase | transposable element gene | chr5:15561465-15562122 FORWARD  
unknown protein | chr5:16414038-16414504 FORWARD  
unknown protein | chr5:16414848-16415220 REVERSE  
FUNCTIONS IN: molecular\_function unknown; INVOLVED IN: biological\_process unknown; LOCATED IN  
unknown protein | chr5:18421744-18421962 FORWARD  
unknown protein | chr5:18556975-18558097 REVERSE  
unknown protein | chr5:19403173-19404088 REVERSE  
FUNCTIONS IN: molecular\_function unknown; INVOLVED IN: biological\_process unknown; LOCATED IN  
unknown protein | chr5:20097040-20097486 REVERSE  
unknown protein | chr5:20489094-20489727 REVERSE  
DNA binding | chr5:20724578-20726479 FORWARD  
unknown protein | chr5:20877967-20878464 REVERSE  
unknown protein | chr5:21009592-21010345 FORWARD  
FUNCTIONS IN: molecular\_function unknown; INVOLVED IN: biological\_process unknown; LOCATED IN  
unknown protein | chr5:21595994-21598224 FORWARD  
unknown protein | chr5:21811633-21814908 FORWARD  
unknown protein | chr5:21848135-21850111 FORWARD  
unknown protein | chr5:21872794-21873303 REVERSE  
RNA binding | chr5:22293325-22295144 FORWARD  
FUNCTIONS IN: molecular\_function unknown; INVOLVED IN: biological\_process unknown; LOCATED IN  
unknown protein | chr5:22885192-22886541 FORWARD  
unknown protein | chr5:23098959-23099368 FORWARD  
unknown protein | chr5:23126922-23127654 REVERSE  
FUNCTIONS IN: molecular\_function unknown; INVOLVED IN: N-terminal protein myristoylation; LOCATED IN  
FUNCTIONS IN: molecular\_function unknown; INVOLVED IN: biological\_process unknown; LOCATED IN  
unknown protein | chr5:23485500-23486818 FORWARD  
unknown protein | chr5:23793129-23794245 FORWARD  
antiporter/ drug transporter | chr5:24301633-24303068 FORWARD  
unknown protein | chr5:24418229-24422234 REVERSE  
FUNCTIONS IN: molecular\_function unknown; INVOLVED IN: biological\_process unknown; LOCATED IN  
FUNCTIONS IN: molecular\_function unknown; INVOLVED IN: biological\_process unknown; LOCATED IN  
unknown protein | chr5:25541576-25542893 FORWARD  
unknown protein | chr5:25748202-25748297 REVERSE  
unknown protein | chr5:26052245-26052644 REVERSE  
unknown protein | chr5:26095147-26095771 REVERSE  
unknown protein | chr5:26207654-26207962 FORWARD  
unknown protein | chr5:26462585-26464131 FORWARD  
unknown protein | chr5:26934153-26934952 REVERSE  
unknown protein | chr5:26964770-26965996 REVERSE  
Symbols: YCF10 | hypothetical protein | chrC:60741-61430 FORWARD

description

2-oxoglutarate-dependent dioxygenase, putative | chr1:2025601-2027271 FORWARD

2-oxoglutarate-dependent dioxygenase, putative | chr1:2032338-2034018 FORWARD

LOCATED IN: endomembrane system, integral to membrane; EXPRESSED IN: 16 plant structures; EXPRI

Symbols: DHAR1, ATDHAR1 | DHAR1 (dehydroascorbate reductase); copper ion binding / glutathione c

Symbols: MDHAR, ATMDAR3 | MDHAR (MONODEHYDROASCORBATE REDUCTASE); monodehydroasco

Symbols: APX5 | APX5 (ASCORBATE PEROXIDASE 5); L-ascorbate peroxidase/ heme binding / peroxidas

Symbols: GRX480 | GRX480; electron carrier/ protein disulfide oxidoreductase | chr1:10013474-10014

glutaredoxin family protein | chr1:11858211-11859292 FORWARD

glutaredoxin family protein | chr1:23953233-23954492 FORWARD

glutaredoxin family protein | chr3:10848669-10850122 FORWARD

glutaredoxin family protein | chr3:23268710-23269324 FORWARD

glutaredoxin family protein | chr4:8925806-8926310 FORWARD

description

Symbols: GL22 | GL22 (GERMIN-LIKE PROTEIN SUBFAMILY 2 MEMBER 2 PRECURSOR.); manganese ion

Symbols: ILR2 | ILR2 (IAA-LEUCINE RESISTANT 2) | chr3:6341918-6343178 REVERSE

cytochrome c oxidase copper chaperone family protein | chr1:19760001-19761452 REVERSE

Symbols: CUTA | CUTA; copper ion binding | chr2:14269581-14271723 FORWARD

copper-binding family protein | chr3:18152288-18153375 REVERSE

heavy-metal-associated domain-containing protein / copper chaperone (CCH)-related | chr4:16685720

Symbols: MT1C | MT1C; copper ion binding | chr1:2341542-2342123 FORWARD

metal ion binding | chr2:7920508-7922326 REVERSE

description

LOCATED IN: membrane; CONTAINS InterPro DOMAIN/s: Protein of unknown function DUF250 (InterPro

F1F0-ATPase inhibitor protein, putative | chr5:1372147-1373619 FORWARD

nucleotide-sugar transmembrane transporter | chr1:2242256-2244428 REVERSE

sugar transporter family protein | chr1:2848348-2852270 FORWARD

OST3/OST6 family protein | chr1:22814390-22815430 FORWARD

amino acid transporter family protein | chr1:2583654-2586744 REVERSE

amino acid transporter family protein | chr5:427833-430695 FORWARD

Symbols: RCP1, MEX1 | RCP1 (ROOT CAP 1); maltose transmembrane transporter | chr5:5772583-5772583 REVERSE  
mitochondrial phosphate transporter, putative | chr3:18114526-18116499 REVERSE  
unknown protein | chr3:23168061-23169187 FORWARD  
mitochondrial substrate carrier family protein | chr5:25958025-25960644 REVERSE  
cation efflux family protein | chr1:5578431-5580693 FORWARD  
Symbols: COPT2 | COPT2; copper ion transmembrane transporter/ high affinity copper ion transmembrane  
proton-dependent oligopeptide transport (POT) family protein | chr1:6520748-6523368 FORWARD  
proton-dependent oligopeptide transport (POT) family protein | chr1:12127389-12130407 REVERSE  
proton-dependent oligopeptide transport (POT) family protein | chr1:21968071-21972411 FORWARD  
proton-dependent oligopeptide transport (POT) family protein | chr2:15864396-15866408 REVERSE  
Symbols: NHX4, ATNHX4 | NHX4 (SODIUM HYDROGEN EXCHANGER 4); sodium ion transmembrane transporter  
ChaC-like family protein | chr4:15185886-15188484 FORWARD  
magnesium transporter CorA-like family protein (MRS2-2) | chr5:25806769-25809641 REVERSE  
potassium channel tetramerisation domain-containing protein | chr4:15054873-15056826 FORWARD  
Symbols: ATNAP5 | ATNAP5; ATPase, coupled to transmembrane movement of substances / transport  
ABC transporter family protein | chr3:19399378-19402953 FORWARD  
MATE efflux protein-related | chr4:14368919-14370892 FORWARD  
Symbols: PIP2F, PIP2;4 | PIP2;4 (PLASMA MEMBRANE INTRINSIC PROTEIN 2;4); water channel | chr5:21968071-21972411  
Symbols: CXIP4 | CXIP4 (CAX INTERACTING PROTEIN 4); nucleic acid binding / zinc ion binding | chr2:15864396-15866408  
choline transporter-related | chr1:8955308-8957949 REVERSE  
AWPM-19-like membrane family protein | chr1:10323655-10324743 FORWARD  
MATE efflux family protein | chr1:24901978-24904443 FORWARD  
antiporter/ drug transporter/ transporter | chr2:1353755-1355790 REVERSE  
auxin efflux carrier family protein | chr2:7606757-7609261 FORWARD  
MATE efflux family protein | chr4:11625362-11629337 REVERSE  
Symbols: ATTIL, TIL | TIL (TEMPERATURE-INDUCED LIPOCALIN); binding / transporter | chr5:23500061-23500061  
metal ion binding | chr5:26430202-26430912 FORWARD

#### description

Symbols: FLA9 | FLA9 (FASCICLIN-LIKE ARABINOOGALACTAN 9) | chr1:982506-983540 REVERSE  
Symbols: AGP5 | AGP5 (ARABINOOGALACTAN-PROTEIN 5) | chr1:12917149-12917763 FORWARD  
Symbols: AGP19, ATAGP19 | AGP19 (ARABINOOGALACTAN-PROTEIN 19) | chr1:25809298-25810130 FORWARD  
Symbols: FLA7 | FLA7 (FASCICLIN-LIKE ARABINOOGALACTAN 7) | chr2:1676742-1678455 FORWARD  
Symbols: AGP17, ATAGP17 | AGP17 (ARABINOOGALACTAN PROTEIN 17) | chr2:9844350-9845385 FORWARD  
Symbols: FLA8, AGP8 | FLA8 (FASCICLIN-LIKE ARABINOOGALACTAN PROTEIN 8) | chr2:18742540-187441  
Symbols: AGP10, ATAGP10 | AGP10 (ARABINOOGALACTAN PROTEIN 10) | chr4:5792207-5792790 FORWARD  
arabinogalactan-protein family | chr4:9556978-9557812 FORWARD  
Symbols: AGP18, ATAGP18 | AGP18 (ARABINOOGALACTAN PROTEIN 18) | chr4:17605758-17606755 REVERSE

Symbols: AGP3 | AGP3 (arabinogalactan-protein 3) | chr4:18580838-18581585 REVERSE  
Symbols: FLA17 | FLA17 (FASCICLIN-LIKE ARABINOGALACTAN PROTEIN 17 PRECURSOR) | chr5:1952851  
Symbols: AGP25, ATAGP25 | AGP25 (ARABINOGALACTAN PROTEINS 25) | chr5:6233519-6234206 REVE  
Symbols: AGP14, ATAGP14 | AGP14 (ARABINOGALACTAN PROTEIN 14) | chr5:22893151-22893642 FOI  
Symbols: FLA12 | FLA12 | chr5:24325727-24326702 REVERSE  
Symbols: AGP1, ATAGP1 | AGP1 (ARABINOGALACTAN PROTEIN 1) | chr5:25721933-25722646 FORWA  
Symbols: AGP7 | AGP7 | chr5:26128584-26129338 REVERSE

#### description

Symbols: ATCSLA10, CSLA10 | ATCSLA10; cellulose synthase/ transferase, transferring glycosyl groups  
Symbols: ATCSLA15, CSLA15 | ATCSLA15; cellulose synthase/ transferase, transferring glycosyl groups  
Symbols: ATCSLA01, CSLA01, ATCSLA1 | ATCSLA01; cellulose synthase/ glucosyltransferase/ transferase  
Symbols: CESA8, IRX1, ATCESA8, LEW2 | IRX1 (IRREGULAR XYLEM 1); cellulose synthase/ transferase, tr  
Symbols: ATCSLG2, CSLG2 | ATCSLG2; cellulose synthase/ transferase/ transferase, transferring glycosyl

#### description

polygalacturonase | chr1:3515365-3517888 REVERSE  
polygalacturonase | chr1:8327312-8329622 FORWARD  
pseudogene, polygalacturonase (pectinase), putative, similar to polygalacturonase (*Cucumis sativus*) G  
BURP domain-containing protein / polygalacturonase, putative | chr1:22247474-22249636 REVERSE  
glycoside hydrolase family 28 protein / polygalacturonase (pectinase) family protein | chr3:5325290-5:  
polygalacturonase, putative / pectinase, putative | chr5:4724450-4726513 FORWARD

#### description

Symbols: ATEXPA10, AT-EXP10, ATEXP10, ATHEXP ALPHA 1.1, EXP10 | ATEXPA10 (ARABIDOPSIS THALIA  
Symbols: ATXTH17, XTH17 | XTH17 (XYLOGLUCAN ENDOTRANSGLUCOSYLASE/HYDROLASE 17); hydroly  
xyloglucan:xyloglucosyl transferase, putative / xyloglucan endotransglycosylase, putative / endo-xylogl  
xyloglucan:xyloglucosyl transferase, putative / xyloglucan endotransglycosylase, putative / endo-xylogl  
Symbols: ATEXLB1, EXPR, AT-EXPR, ATEXPR1, ATHEXP BETA 3.1 | ATEXLB1 (ARABIDOPSIS THALIANA EX  
Symbols: EXGT-A4 | EXGT-A4 (ENDOXYLOGLUCAN TRANSFERASE A4); hydrolase, acting on glycosyl bon  
Symbols: XTR3 | XTR3 (XYLOGLUCAN ENDOTRANSGLYCOSYLASE 3); hydrolase, acting on glycosyl bonds

#### description



Symbols: ATAMY1, AMY1 | AMY1 (ALPHA-AMYLASE-LIKE); alpha-amylase | chr4:12851969-12853845 F

Symbols: ATBETA-AMY, AT-BETA-AMY, RAM1, BMY1, BAM5 | BAM5 (BETA-AMYLASE 5); beta-amylase

Symbols: RCP1, MEX1 | RCP1 (ROOT CAP 1); maltose transmembrane transporter | chr5:5772583-5772

Symbols: ATISA3, ISA3 | ISA3 (ISOAMYLASE 3); alpha-amylase/ isoamylase | chr4:5784074-5789002 FO

description

beta-fructofuranosidase, putative / invertase, putative / saccharase, putative / beta-fructosidase, puta

beta-fructosidase (BFRUCT3) / beta-fructofuranosidase / invertase, vacuolar | chr1:23199718-2320376

Symbols: HKL1 | HKL1 (HEXOKINASE-LIKE 1); ATP binding / fructokinase/ glucokinase/ hexokinase | chr

Symbols: ATHXK4, HKL2 | ATHXK4; ATP binding / fructokinase/ glucokinase/ hexokinase | chr3:699489

description

O-methyltransferase family 2 protein | chr1:28822186-28823673 REVERSE

Symbols: LAC2, ATLAC2 | LAC2 (laccase 2); laccase | chr2:12524889-12527747 REVERSE

Symbols: IRX12, LAC4 | IRX12 (IRREGULAR XYLEM 12); laccase | chr2:15934460-15937616 FORWARD

Symbols: LAC10 | LAC10 (laccase 10); laccase | chr5:72392-74756 FORWARD

Symbols: LAC11 | LAC11 (laccase 11); laccase | chr5:777021-779424 REVERSE

Symbols: LAC17, ATLAC17 | LAC17 (laccase 17); laccase | chr5:24167996-24170462 FORWARD

description

Symbols: ATPRR1, PRR1 | PRR1 (PINORESINOL REDUCTASE 1); pinoresinol reductase | chr1:11546338-

transferase family protein | chr3:18637854-18639185 FORWARD

transferase family protein | chr5:5365669-5367385 REVERSE

Symbols: 4CL3 | 4CL3; 4-coumarate-CoA ligase | chr1:24167202-24171502 REVERSE

4-coumarate--CoA ligase family protein / 4-coumaroyl-CoA synthase family protein | chr5:15213765-15

Symbols: ATTSM1, TSM1 | TSM1; N1,N5,N10-tris-(5-hydroxyferuloyl)spermidine O-methyltransferase/

Symbols: CAD5, ATCAD5, CAD-5 | ATCAD5 (CINNAMYL ALCOHOL DEHYDROGENASE 5); cinnamyl-alcohol

Symbols: ELI3-2, ELI3, ATCAD8, CAD-B2 | ELI3-2 (ELICITOR-ACTIVATED GENE 3-2); aryl-alcohol dehydrog

description

Symbols: PAP1, MYB75, SIAA1, ATMYB75 | PAP1 (PRODUCTION OF ANTHOCYANIN PIGMENT 1); DNA b

oxidoreductase, 2OG-Fe(II) oxygenase family protein | chr2:16012535-16014753 REVERSE

oxidoreductase, 2OG-Fe(II) oxygenase family protein | chr3:20766735-20769324 REVERSE

oxidoreductase, 2OG-Fe(II) oxygenase family protein | chr5:1672120-1674739 FORWARD

transferase family protein | chr1:1009542-1011056 REVERSE

Symbols: AACT1 | AACT1 (anthocyanin 5-aromatic acyltransferase 1); transferase/ transferase, transferase  
dihydroflavonol 4-reductase family / dihydrokaempferol 4-reductase family | chr4:16833933-1683561

Symbols: UGT78D2 | UGT78D2 (UDP-GLUCOSYL TRANSFERASE 78D2); UDP-glycosyltransferase/ anthocyanin  
UDP-glucuronosyl/UDP-glucosyl transferase family protein | chr1:1820308-1821894 REVERSE

description

geranylgeranyl transferase type II beta subunit, putative / RAB geranylgeranyltransferase beta subunit,  
geranylgeranyl transferase alpha subunit-related / RAB geranylgeranyltransferase alpha subunit-related

Symbols: GGPS6 | GGPS6 (geranylgeranyl pyrophosphate synthase 6); farnesyltransferase | chr1:

Symbols: TPS10 | TPS10 (terpene synthase 10); (E)-beta-ocimene synthase/ myrcene synthase | chr2:1

Symbols: LAS1 | LAS1; lanosterol synthase | chr3:16512271-16517522 REVERSE

Symbols: ATTPS03 | ATTPS03; (E)-beta-ocimene synthase/ myrcene synthase | chr4:9407768-9410877

description

Symbols: BCAT4 | BCAT4 (BRANCHED-CHAIN AMINOTRANSFERASE4); catalytic/ methionine-oxo-acid transferase

Symbols: MAM1, IMS3 | MAM1 (METHYLTHIOALKYLMALATE SYNTHASE 1); 2-isopropylmalate synthase

Symbols: CYP83A1, REF2 | CYP83A1 (CYTOCHROME P450 83A1); oxidoreductase, acting on paired donor and acceptor

Symbols: FMO GS-OX2 | FMO GS-OX2 (FLAVIN-MONOOXYGENASE GLUCOSINOLATE S-OXYGENASE 2); oxidoreductase, acting on paired donor and acceptor

Symbols: FMO GS-OX3 | FMO GS-OX3 (FLAVIN-MONOOXYGENASE GLUCOSINOLATE S-OXYGENASE 3); oxidoreductase, acting on paired donor and acceptor

Symbols: FMO GS-OX1 | FMO GS-OX1 (FLAVIN-MONOOXYGENASE GLUCOSINOLATE S-OXYGENASE 1); oxidoreductase, acting on paired donor and acceptor

Symbols: AOP2 | AOP2 (ALKENYL HYDROXALKYL PRODUCING 2); oxidoreductase, acting on paired donor and acceptor  
2-oxoglutarate-dependent dioxygenase, putative | chr2:10829916-10831655 REVERSE

Symbols: CYP79B3 | CYP79B3; electron carrier/ heme binding / iron ion binding / monooxygenase/ oxygenase

Symbols: MYB29, ATMYB29, PMG2 | ATMYB29 (ARABIDOPSIS THALIANA MYB DOMAIN PROTEIN 29); DNA binding / transcription factor

Symbols: MYB76, AtMYB76 | MYB76 (myb domain protein 76); DNA binding / transcription factor | chr1:19350375

Symbols: MBP1, ATMBP1 | MBP1 (MYROSINASE-BINDING PROTEIN 1); protein binding | chr1:19350375  
myrosinase-associated protein, putative | chr1:20158664-20160815 REVERSE

Symbols: ESP, TASTY | ESP (EPITHIOSPECIFIER PROTEIN); enzyme regulator | chr1:20170715-20173949

Symbols: NIT2 | NIT2 (nitrilase 2); indole-3-acetonitrile nitrilase/ indole-3-acetonitrile nitrile hydratase

description

Symbols: BFN1, ENDO1 | BFN1 (BIFUNCTIONAL NUCLEASE I); T/G mismatch-specific endonuclease/ endonuclease  
transducin family protein / WD-40 repeat family protein | chr1:18305541-18307557 FORWARD  
transposable element gene | chr4:2189515-2193763 FORWARD  
Symbols: SADHU1-1 | transposable element gene | chr2:4005995-4007044 REVERSE  
Symbols: SADHU6-1 | transposable element gene | chr3:525370-526255 FORWARD  
Symbols: SADHU3-2 | transposable element gene | chr3:14749400-14750294 REVERSE  
Symbols: SADHU4-1 | transposable element gene | chr5:10933823-10934730 REVERSE  
transposable element gene | chr2:2936239-2938827 FORWARD  
transposable element gene | chr3:7375158-7376420 FORWARD  
transposable element gene | chr3:15598179-15600798 FORWARD  
transposable element gene | chr5:25855347-25857377 REVERSE  
transposable element gene | chr3:15677383-15678009 REVERSE  
Symbols: HIS1-3 | HIS1-3 (HISTONE H1-3); DNA binding / nucleosomal DNA binding | chr2:7846050-7846050  
Symbols: HTA4 | HTA4; DNA binding | chr4:7884516-7885664 FORWARD  
histone H3 | chr1:2971593-2972199 REVERSE  
histone H4 | chr1:2368837-2369734 FORWARD

description

lysine-ketoglutarate reductase/saccharopine dehydrogenase bifunctional enzyme | chr4:15985189-15985189

description

arginase, putative | chr4:5646439-5648727 REVERSE

description

pseudogene, similar to NADH dehydrogenase subunit 5, blastp match of 97% identity and 2.2e-244 P-value  
NADH-ubiquinone oxidoreductase-related | chr3:23223061-23224308 REVERSE  
NADH-ubiquinone oxidoreductase-related | chr5:21413646-21415006 FORWARD  
Symbols: ATP9 | subunit 9 of mitochondrial F0-ATPase | chrM:278649-279152 FORWARD

description

Symbols: PSBP-2 | PSBP-2 (photosystem II subunit P-2); calcium ion binding | chr2:13119047-13120091  
Symbols: PSBA | Encodes chlorophyll binding protein D1, a part of the photosystem II reaction center complex  
Symbols: PSBC | chloroplast gene encoding a CP43 subunit of the photosystem II reaction center. promoter  
Symbols: PSBB | encodes for CP47, subunit of the photosystem II reaction center. | chrC:72371-73897  
Symbols: PSAB | Encodes the D1 subunit of photosystem I and II reaction centers. | chrC:37375-39579  
Symbols: PSAA | Encodes psaA protein comprising the reaction center for photosystem I along with psbA

Symbols: PSAJ | Encodes subunit J of photosystem I. | chrC:66929-67063 FORWARD

Symbols: PSAC | Encodes the PsaC subunit of photosystem I. | chrC:117318-117563 REVERSE

Symbols: PETA | Encodes cytochrome f apoprotein; involved in photosynthetic electron transport chain

Symbols: NDHG | NADH dehydrogenase ND6 | chrC:118377-118907 REVERSE

#### description

Symbols: UGT1, UGT75B1 | UGT75B1 (UDP-GLUCOSYLTRANSFERASE 75B1); UDP-glucose:4-aminobenz

Symbols: ILL6 | ILL6; IAA-amino acid conjugate hydrolase/ metalloproteinase | chr1:16834210-1683828

Symbols: IAR3, JR3 | IAR3 (IAA-ALANINE RESISTANT 3); IAA-Ala conjugate hydrolase/ metalloproteinase

Symbols: ILL5 | ILL5; IAA-amino acid conjugate hydrolase/ metalloproteinase | chr1:19204512-1920658

Symbols: ILR1 | ILR1 (IAA-LEUCINE RESISTANT 1); IAA-Leu conjugate hydrolase/ IAA-Phe conjugate hyd

Symbols: NIT2 | NIT2 (nitrilase 2); indole-3-acetonitrile nitrilase/ indole-3-acetonitrile nitrile hydratase

auxin-responsive family protein | chr1:6872794-6873255 REVERSE

auxin-responsive protein-related | chr2:18641566-18642704 FORWARD

auxin-responsive family protein | chr4:16592397-16592717 REVERSE

auxin-responsive family protein | chr4:16596860-16597144 FORWARD

#### description

Symbols: CYP707A1 | CYP707A1; (+)-abscisic acid 8'-hydroxylase/ oxygen binding | chr4:10521379-105

Symbols: ABF3, DPBF5 | ABF3 (ABSCISIC ACID RESPONSIVE ELEMENTS-BINDING FACTOR 3); DNA binding

Symbols: HVA22K | HVA22K (HVA22-LIKE PROTEIN K) | chr4:17307769-17309867 FORWARD

GRAM domain-containing protein / ABA-responsive protein-related | chr5:2686245-2687251 REVERSE

Symbols: KIN1 | KIN1 | chr5:5209898-5210727 FORWARD

GRAM domain-containing protein / ABA-responsive protein-related | chr5:7858253-7859387 REVERSE

GRAM domain-containing protein / ABA-responsive protein-related | chr5:7863331-7864271 REVERSE

protein phosphatase 2C, putative / PP2C, putative | chr5:23894404-23896619 REVERSE

#### description

2-oxoglutarate-dependent dioxygenase, putative | chr2:10829916-10831655 REVERSE

Symbols: ATERF13, EREBP, ERF13 | ERF13 (ETHYLENE-RESPONSIVE ELEMENT BINDING FACTOR 13); DN  
DNA binding / transcription factor | chr4:2667990-2669364 REVERSE

Symbols: ERF104 | ethylene-responsive element-binding family protein | chr5:24766386-24767430 RE  
universal stress protein (USP) family protein | chr3:23135984-23137173 FORWARD

Symbols: ATMES9, MES9 | MES9 (METHYL ESTERASE 9); hydrolase, acting on ester bonds / methyl indol

description

Symbols: CYP707A1 | CYP707A1; (+)-abscisic acid 8'-hydroxylase/ oxygen binding | chr4:10521379-105

Symbols: ABF3, DPBF5 | ABF3 (ABSCISIC ACID RESPONSIVE ELEMENTS-BINDING FACTOR 3); DNA binding

Symbols: HVA22K | HVA22K (HVA22-LIKE PROTEIN K) | chr4:17307769-17309867 FORWARD

GRAM domain-containing protein / ABA-responsive protein-related | chr5:2686245-2687251 REVERSE

Symbols: KIN1 | KIN1 | chr5:5209898-5210727 FORWARD

GRAM domain-containing protein / ABA-responsive protein-related | chr5:7858253-7859387 REVERSE

GRAM domain-containing protein / ABA-responsive protein-related | chr5:7863331-7864271 REVERSE

protein phosphatase 2C, putative / PP2C, putative | chr5:23894404-23896619 REVERSE

Symbols: UGT1, UGT75B1 | UGT75B1 (UDP-GLUCOSYLTRANSFERASE 75B1); UDP-glucose:4-aminobenz

Symbols: ILL6 | ILL6; IAA-amino acid conjugate hydrolase/ metalloproteinase | chr1:16834210-1683828

Symbols: IAR3, JR3 | IAR3 (IAA-ALANINE RESISTANT 3); IAA-Ala conjugate hydrolase/ metalloproteinase

Symbols: ILL5 | ILL5; IAA-amino acid conjugate hydrolase/ metalloproteinase | chr1:19204512-1920658

Symbols: ILR1 | ILR1 (IAA-LEUCINE RESISTANT 1); IAA-Leu conjugate hydrolase/ IAA-Phe conjugate hyd

Symbols: NIT2 | NIT2 (nitrilase 2); indole-3-acetonitrile nitrilase/ indole-3-acetonitrile nitrile hydratase,

auxin-responsive family protein | chr1:6872794-6873255 REVERSE

auxin-responsive protein-related | chr2:18641566-18642704 FORWARD

auxin-responsive family protein | chr4:16592397-16592717 REVERSE

auxin-responsive family protein | chr4:16596860-16597144 FORWARD

Symbols: CPD, CYP90A, CYP90, CBB3, DWF3, CYP90A1 | CPD (CONSTITUTIVE PHOTOMORPHOGENIC DV

Symbols: ROT3 | ROT3 (ROTUNDIFOLIA 3); oxidoreductase, acting on paired donors, with incorporation

squalene monooxygenase, putative / squalene epoxidase, putative | chr5:8180118-8181027 REVERSE

Symbols: CKX5, ATCKX5, ATCKX6 | CKX5 (CYTOKININ OXIDASE 5); cytokinin dehydrogenase | chr1:2831

2-oxoglutarate-dependent dioxygenase, putative | chr2:10829916-10831655 REVERSE

Symbols: ATERF13, EREBP, ERF13 | ERF13 (ETHYLENE-RESPONSIVE ELEMENT BINDING FACTOR 13); DN

DNA binding / transcription factor | chr4:2667990-2669364 REVERSE

Symbols: ERF104 | ethylene-responsive element-binding family protein | chr5:24766386-24767430 RE

universal stress protein (USP) family protein | chr3:23135984-23137173 FORWARD

Symbols: ATMES9, MES9 | MES9 (METHYL ESTERASE 9); hydrolase, acting on ester bonds / methyl indol

Symbols: AOP2 | AOP2 (ALKENYL HYDROXYALKYL PRODUCING 2); oxidoreductase, acting on paired don

Symbols: GA5, GA20OX1, AT2301, ATGA20OX1 | GA20OX1; gibberellin 20-oxidase | chr4:12990884-12

gibberellin-responsive protein, putative | chr1:8027298-8028125 FORWARD

gibberellin-regulated family protein | chr5:24111324-24112020 FORWARD

Symbols: LOX2, ATLOX2 | LOX2 (LIPOXYGENASE 2); lipoxygenase | chr3:16525410-16529352 FORWARD

Symbols: OPR3 | OPR3 (OPDA-REDUCTASE 3); 12-oxophytodienoate reductase | chr2:2359115-236218

Symbols: JMT | JMT (JASMONIC ACID CARBOXYL METHYLTRANSFERASE); jasmonate O-methyltransfera

Symbols: ESP, TASTY | ESP (EPITHIOSPECIFIER PROTEIN); enzyme regulator | chr1:20170715-20173949

jacalin lectin family protein | chr3:5592582-5595710 FORWARD

Symbols: JR1 | JR1 | chr3:5595938-5598044 REVERSE

UDP-glucuronosyl/UDP-glucosyl transferase family protein | chr1:1703092-1704691 REVERSE

S-adenosyl-L-methionine:carboxyl methyltransferase family protein | chr5:15530015-15531522 FORW

Symbols: BSMT1, ATBSMT1 | BSMT1; S-adenosylmethionine-dependent methyltransferase | chr3:361

log2\_fold change

3.15638  
3.12987  
1.20839  
1.50469  
1.09387  
-1.98766  
-1.62434  
1.02536  
1.00219  
-1.58521  
2.20315  
1.12764  
-1.52125  
-1.13795  
-1.11131  
1.03622  
1.08253  
1.08363  
-1.22059  
1.50898  
1.10344  
1.16651  
1.01699  
1.22913  
2.14935  
-2.89875  
1.70725

inf

-1.04128  
-1.21937  
1.88121  
-1.46358  
-1.16083

log2\_fold change

1.46289  
-1.04128

1.04403

log2\_fold change

2.03939

1.5608

1.53978

1.29601

1.20016

-1.21617

-1.66602

-2.40485

-1.35058

-1.9121

-1.12992

-1.64285

1.12311

1.09045

-1.28473

-1.15905

1.11664

-1.73882

log2\_fold change

1.99185

1.90882

1.44351

-1.06727

1.0113

1.0287

log2\_fold change

-1.37709

1.05064

1.20131

-1.40933

1.18572



log2\_fold change

1.43547  
2.12301  
1.06675  
1.16667

log2\_fold change

1.51773

log2\_fold change

1.04038  
1.12758  
1.06009  
1.25943  
1.91681  
1.75456  
2.07282  
1.19261  
-1.10517  
1.20524  
-1.32013  
1.3889  
1.54072  
1.56587  
1.13025  
-1.17728  
1.082

log2\_fold change

1.89947  
1.7897  
-1.3483  
1.01001  
-1.25187  
1.18288

2.39344  
-1.84919  
-1.29049  
-1.32498  
1.59569  
1.08713  
-2.12416  
1.14552  
-1.66756  
1.14574  
-1.14282  
-1.03287  
1.20873  
-1.20249

log2\_fold change

-2.3909  
-1.33388  
-1.66461  
1.38988  
2.92822  
-1.35554  
1.01463  
1.60405  
-1.89174  
1.27661  
-2.49273  
3.63877  
1.22586  
1.08961  
-1.6778  
1.02479  
1.19772  
-1.57327  
-1.37158  
-1.64586  
1.37268  
1.06131  
1.1002

1.16035  
1.03134  
1.15115  
1.10128  
1.89472  
1.04571  
1.07052  
2.03639  
1.0873  
1.3461  
1.40055  
1.27874  
1.13058  
1.09587  
1.70307  
1.15621  
1.31732  
1.20071  
1.7448  
1.01861  
1.47988  
1.09688  
1.31274  
1.01556

log2\_fold change

1.147  
1.83347  
-1.03356  
1.86233  
2.09352  
-1.16717  
1.43642  
-1.37473  
-1.45975  
1.16184  
1.03028  
1.04823  
-1.13457

-1.90806  
2.23363

log2\_fold change

-1.74198  
1.34978  
-1.236  
-1.65376  
0.313837  
-1.00524  
-1.03028  
1.1814  
-1.13069  
1.1054  
-1.12591  
1.24686  
2.38942  
1.42175  
1.00595  
1.43225  
1.06147  
1.09206  
1.21267  
1.09545  
1.0296  
1.00362  
1.13903  
1.58068  
3.04564  
2.70247  
1.43914  
-1.58505  
1.20054  
1.52682  
-1.07091

log2\_fold change

1.03274

1.71604

Inf

1.04518

1.08867

1.02624

1.01309

1.01722

1.1342

1.01023

1.1927

1.06778

-2.64418

2.96913

1.05889

log2\_fold change

1.05331

1.40825

1.03882

1.30651

1.77261

1.13429

1.35594

1.72533

1.14835

-1.28413

1.21607

1.46958

2.28145

3.14301

1.27682

1.32599

-1.37855

1.49228

-1.3742

-1.16366

1.1068  
1.59055  
1.47686  
1.22618  
1.135  
-1.13789  
1.00092  
-1.15863  
-2.39598  
1.22396  
1.07592  
-1.06011  
1.01558  
1.08569  
-1.32776  
1.272  
1.06183  
1.00501  
-1.10181  
1.66102  
-1.06739  
1.32624  
1.32962  
-1.46543  
2.24922  
1.04343  
1.70725  
1.31879  
1.28147  
1.70289  
1.43569  
1.17276  
1.08316  
1.15482  
1.96538  
1.05358  
1.39232  
1.57678  
1.54878  
1.18991  
2.65302

-2.3261  
-1.22059  
1.09833  
1.79873  
1.08115  
1.27439  
1.21614  
2.75716  
1.02794  
1.14069  
1.42686  
2.99952  
1.01391  
1.26703  
-1.31196  
1.78579  
1.04799  
-1.48748  
-1.51886  
-1.00862  
1.76315  
1.03183  
1.96676  
1.15464  
1.84268  
1.02025  
1.09232  
1.52277  
2.27795  
-1.20116  
1.24232  
-1.24915

log2\_fold change

1.05067  
1.32767  
1.04578  
-1.48008  
1.31057

-1.41684  
1.09729  
1.45898  
1.2651  
-1.93794  
1.1344  
-1.19574  
1.08732  
1.13982  
1.73013  
2.04129  
1.15355  
1.26019  
1.27397  
1.14928  
1.35209  
2.64116  
1.18985  
1.77163  
1.00048  
1.287  
1.09177  
-1.11031  
1.40718  
1.00512  
1.21352  
1.6761  
1.0976  
2.09693  
1.11031  
1.53874  
1.13394  
1.09499  
-1.26433  
-1.27638  
1.01246  
-1.66986  
1.208  
-2.17742  
1.06464  
1.12827



1.03615  
-1.09863  
1.43847  
-1.09834  
1.18493  
-1.60776  
-3.79043  
1.55374  
1.37927  
1.24691  
-1.33878  
1.02208  
-2.08471  
1.29282  
1.05569  
1.36179  
-1.00373  
2.11919  
1.42564  
1.04122  
1.51706  
1.80056  
1.12346  
1.09533  
1.16529

inf  
inf

1.55131  
1.0004  
1.16581  
1.42196  
1.03797  
1.23558  
-1.64262  
1.44987  
1.00794  
1.01196  
1.04195  
1.49807  
1.47837  
1.00821

3.89646  
1.1934  
1.1123  
1.13945  
1.03651  
1.16748  
2.58565  
1.88678  
1.356  
1.0318  
-1.35998  
2.33865  
1.00614  
1.31102  
1.23076  
1.21783  
1.39392  
-1.13309  
1.70653  
1.31894  
1.11131  
1.07747  
1.07534  
1.01264  
-2.60708  
-1.27841  
1.75109  
1.05181  
1.65295  
1.08527  
3.51154  
1.04043  
1.11361  
-1.01462  
1.33151  
1.30524  
-1.13865  
1.11991  
1.50294  
1.74486  
1.00966

1.64054  
-1.05518  
1.05947  
1.10102  
1.05468  
1.10659  
1.03323  
1.51251  
1.1258  
-1.0864  
1.54299  
1.05123  
1.09668  
1.29086  
1.26476

inf

-1.14826  
1.52134  
1.4401  
1.10903  
1.23595  
1.47588  
-1.55431  
1.03733  
-1.22673

inf

-2.15929

inf

-1.63629

-1.49396

-2.38297

1.38103

1.22281

-1.03734

-1.28055

1.21269

1.05633

-2.71775

2.14185

1.5142

-5.13702

|     |          |
|-----|----------|
|     | -1.76029 |
|     | 1.10812  |
|     | -1.02247 |
|     | 1.23391  |
|     | -1.11577 |
|     | 1.21909  |
|     | 1.12776  |
|     | 1.03724  |
|     | 2.13513  |
|     | -1.66028 |
|     | 1.57879  |
| inf |          |
|     | 1.31387  |
|     | 1.38963  |
|     | 1.06211  |
|     | 1.19149  |
|     | 1.2814   |
|     | 1.2328   |
|     | 1.02371  |
|     | 1.13675  |
|     | -1.01225 |
|     | 1.62283  |
|     | -3.22481 |
|     | 1.73555  |
|     | -1.10205 |
|     | -1.11045 |
|     | 1.52112  |
|     | 1.2982   |
|     | 1.47229  |
|     | 1.46311  |
|     | 1.34369  |
|     | 3.36905  |
|     | 1.32388  |
|     | 1.82822  |
|     | 1.49207  |
|     | 1.7387   |
|     | 3.16744  |
|     | 1.50216  |
| inf |          |
|     | 1.32101  |
|     | 1.34303  |

1.09753  
1.00884  
1.06547  
1.3109  
1.1799

inf  
inf  
inf

1.24124  
1.02278  
-1.17215  
1.11285  
-2.83296  
-1.28162  
1.03369  
-2.25048  
-1.45206  
1.99852  
1.07537  
2.34778  
1.04903  
1.4852  
-1.07196  
1.42998  
1.11482  
1.52329  
-1.52672  
-1.39501  
-1.32393  
1.12354  
1.5424  
2.18036  
2.4904  
1.02511  
-1.07876  
1.05762  
1.63744  
-2.10524  
-1.29259  
1.05086  
1.28618

1.00873  
1.31566  
1.3188  
1.91396  
1.10942  
1.44528  
1.23761  
-1.10448  
-1.48779  
1.83759  
-1.56047  
1.0065  
1.47495  
1.00287  
-1.32338  
1.10596  
1.61499  
2.3119  
1.32746  
1.05919  
1.13319  
1.01599  
1.02337  
-1.38508  
-1.15513  
1.91343  
1.03911  
1.00647  
1.44177  
1.26771  
-1.36147  
2.46227  
1.12473  
1.02267  
1.03281  
1.07782  
1.58341  
1.30518  
1.56924  
1.37937

inf

|     |          |
|-----|----------|
|     | 1.1131   |
|     | 2.83377  |
|     | -1.03194 |
|     | -1.6835  |
|     | -1.71736 |
|     | -2.18402 |
|     | -1.27664 |
|     | -1.51267 |
|     | -1.14846 |
|     | 2.3182   |
|     | 1.70587  |
|     | 2.57505  |
|     | 1.26079  |
|     | 1.01158  |
|     | 1.38186  |
|     | 1.17564  |
| Inf |          |
|     | 1.20656  |
|     | 1.35326  |
|     | 1.33089  |
|     | -1.77275 |
|     | 1.02121  |
|     | -1.56029 |
|     | 2.19933  |
|     | 1.05938  |
|     | -1.00958 |
|     | 1.1011   |
|     | 1.12098  |
|     | 1.11818  |
|     | -1.4837  |
|     | 1.01596  |
|     | 2.14024  |
|     | 1.72505  |
|     | 2.36181  |
|     | 1.3664   |
|     | 1.41371  |
|     | 1.19908  |
|     | 1.20173  |
|     | 1.98007  |
|     | 1.10812  |
|     | 1.24616  |

log2\_fold change

1.04042  
1.18772  
-1.08103  
1.5068  
1.03407  
-1.72914  
3.14265  
1.04047  
1.03017  
1.13738  
-1.93666  
-1.29063

log2\_fold change

-2.59085  
-1.42713  
1.01777  
1.18378  
1.33604  
1.39998  
1.41962  
2.44894

log2\_fold change

-1.10264  
1.24282  
1.51966  
1.10483  
-1.00988  
1.40992  
1.01366



1.01155  
-1.28437  
1.49069  
1.40557  
-1.13144  
-1.29677  
-1.39381  
-1.53496  
-1.20696  
-1.44079  
-1.17723  
1.04904  
1.0478  
1.05814  
1.50211  
1.21541  
-1.00247  
-1.28529  
1.4227  
1.10903  
-1.38797  
1.12524  
-1.23187  
1.52914  
1.13253  
1.01675  
1.84458

log2\_fold change

-1.03621  
-1.31121  
-2.44671  
-1.08019  
-1.07162  
-1.00299  
-1.11328  
-1.23458  
-1.10695

-2.20575  
1.08034  
-1.40722  
-1.65245  
-1.25441  
-1.35948  
1.25965

log2\_fold change

2.1498  
1.38881  
2.32314  
-1.28274  
2.60791

log2\_fold change

-1.01809  
-1.36604  
1.30774  
-1.0401  
1.57709  
1.07945

log2\_fold change

1.35444  
-1.95526  
-1.83281  
-1.02138  
-1.22305  
1.19001  
1.71902

log2\_fold change

1.84087

1.45266

1.01155

1.0101

log2\_fold change

1.24541

1.19997

1.47731

1.33281

log2\_fold change

3.24311

-1.37506

-1.3637

-1.22802

-2.63596

-1.8267

log2\_fold change

-1.08632

1.51069

1.08419

-1.05677

1.9299

Inf

1.39909

3.85242

log2\_fold change

1.65771

2.26531

3.04333  
2.38914  
1.20138  
-1.75626  
1.22777  
1.04961  
1.36165

log2\_fold change

1.028  
-1.18555  
1.57236  
3.39559  
2.01455  
2.79044

log2\_fold change

1.34446  
1.08768  
1.08569  
1.94814  
1.21553  
1.32866  
2.18646  
1.29925  
1.18528  
1.39232  
1.57678  
2.56372  
1.20545  
1.61193  
3.45531

log2\_fold change

-1.68378  
1.15  
1.34513  
1.06479  
1.0399  
6.36272  
1.07162  
2.67701  
1.27551  
1.08131  
1.57069  
2.02828  
1.06144  
1.06071  
-1.00961  
1.00011

log2\_fold change

1.45911

log2\_fold change

1.98964

log2\_fold change

1.00992  
1.18883  
1.08557  
1.67724

log2\_fold change

1.04883  
1.88939  
1.89176  
1.64958  
1.24403  
1.46369

2.94099

1.93176

1.03651

2.36344

log2\_fold change

1.85097

1.42413

1.07374

2.82028

1.14243

3.45531

-1.84963

1.55906

4.43433

3.63278

log2\_fold change

1.23777

1.02184

1.24801

-1.32837

1.98703

-1.49222

-1.68033

1.68068

log2\_fold change

1.29925

1.86582

1.34944

1.26214

1.0193

2.04376

Upregulated\_Downregulated\_MIOX4\_5.0\_Mapman.txt

1.23777  
1.02184  
1.24801  
-1.32837  
1.98703  
-1.49222  
-1.68033  
1.68068  
1.85097  
1.42413  
1.07374  
2.82028  
1.14243  
3.45531  
-1.84963  
1.55906  
4.43433  
3.63278  
1.34001  
1.06311  
1.29621  
1.09094  
1.29925  
1.86582  
1.34944  
1.26214  
1.0193  
2.04376  
2.18646  
-1.07537  
-1.07635  
-3.2326  
1.46705  
1.76284  
1.28822  
1.61193  
1.07626

2.04482  
3.70745  
-1.47282  
2.33413
