# Supplementary material for: Mechanisms underlying the enhanced biomass and abiotic stress tolerance phenotype of an Arabidopsis MIOX over‐expresser
Source: PubMed Central journal article supplement — Plant Direct. 2019 Sep 2;3(9):e00165. doi: 10.1002/pld3.165 (PMC6718051; doi:10.1002/pld3.165), 2019-09-02
Supplement: PLD3-3-e00165-s005.pdf [file PLD3-3-e00165-s005.pdf]

[GO Accession: GO:0009605](#)

|                        |                               |
|------------------------|-------------------------------|
| <b>Ontology</b>        | Biological Process            |
| <b>Description</b>     | response to external stimulus |
| <b>Annotated/Total</b> | 30/899                        |
| <b>Annotated/Total</b> | 65/31819                      |

| ID        | Description                                                |
|-----------|------------------------------------------------------------|
| AT3G63375 | ----                                                       |
| AT2G24210 | TPS10 terpene synthase 10                                  |
| AT5G24770 | VSP2, ATVSP2 vegetative storage protein 2                  |
| AT2G02990 | RNS1, ATRNS1 ribonuclease 1                                |
| AT4G16740 | ATTPS03, TPS03 terpene synthase 03                         |
| AT3G11480 | unknown protein; Has 23 Blast hits                         |
| AT1G52030 | MBP2, MBP1, F-ATMBP myrosinase-binding protein 2           |
| AT3G16470 | JR1 Mannose-binding lectin superfamily protein             |
| AT4G23600 | COR13, JR2 Tyrosine transaminase family protein            |
| AT1G32640 | ATMYC2, RD22BP1, JAI1, JIN1, MYC2, ZBF1                    |
| AT1G43160 | RAP2 related to AP2 6                                      |
| AT2G06050 | OPR3 oxophytodienoate-reductase 3                          |
| AT2G34810 | FAD-binding Berberine family protein                       |
| AT4G15440 | HPL1, CYP74B2 hydroperoxide lyase 1                        |
| AT3G45140 | LOX2, ATLOX2 lipoxygenase 2                                |
| AT4G10390 | Protein kinase superfamily protein                         |
| AT4G24350 | Phosphorylase superfamily protein                          |
| AT5G07690 | MYB29, ATMYB29, PMG2 myb domain protein                    |
| AT5G10300 | ATMES5, MES5, HNL methyl esterase 5                        |
| AT1G74930 | ORA47 Integrase-type DNA-binding superfamily protein       |
| AT1G19640 | JMT jasmonic acid carboxyl methyltransferase               |
| AT5G44420 | PDF1, PDF1A, LCR77 plant defensin 1                        |
| AT2G22330 | CYP79B3 Cytochrome P450                                    |
| AT3G61190 | BAP1 BON association protein 1                             |
| AT2G25930 | ELF3, PYK20 hydroxyproline-rich glycoprotein family protei |
| AT1G66760 | MATE efflux family protein                                 |
| AT1G01720 | ATAF1, ANAC002 NAC (No Apical Meristem)                    |
| AT1G29395 | COR414-TM1, COR413IM1, COR413-TM1 COLD REGULATED 314       |
| AT1G51760 | IAR3, JR3 peptidase M20/M25/M40 family protein             |
| AT4G24220 | VEP1, AWI31 NAD(P)-binding Rossmann-fold superfamily prote |









[GO Accession: GO:0010035](#)

**Ontology:** Biological Process

**Description:** response to inorganic substance

**Annotated/Total number in query list:** 13/899

**Annotated/Total number in background/refer**

| log2(fold_change) | ID        | Description                               |
|-------------------|-----------|-------------------------------------------|
| 45.6873           | AT5G24770 | VSP2, ATVSP2 vegetative storage protein 2 |
| 3.39559           | AT3G23250 | MYB15, ATY19, ATMYB15 myb domain pro      |
| 3.15638           | AT1G54050 | HSP20-like chaperones superfamily protei  |
| 2.96913           | AT2G47180 | AtGolS1, GolS1 galactinol synthase 1      |
| 2.79044           | AT1G56650 | PAP1, MYB75, SIAA1, ATMYB75               |
| 2.33413           | AT5G59780 | MYB59, ATMYB59, ATMYB59-1 myb domai       |
| 2.19977           | AT1G07610 | MT1C metallothionein 1C                   |
| 2.04482           | AT5G67300 | ATMYBR1, ATMYB44, MYBR1, MYB44 myb        |
| 1.86974           | AT2G47190 | ATMYB2, MYB2 myb domain protein 2         |
| 1.83347           | AT2G23290 | AtMYB70, MYB70 myb domain protein 70      |
| 1.77261           | AT2G41380 | S-adenosyl-L-methionine-dependent meth    |
| 1.76284           | AT3G20390 | endoribonuclease L-PSP family protein     |
| 1.71555           | AT3G46130 | ATMYB48, ATMYB48-3, MYB48 myb domai       |
| 1.64373           |           |                                           |
| 1.46705           |           |                                           |
| 1.42175           |           |                                           |
| 1.39665           |           |                                           |
| 1.39232           |           |                                           |
| 1.36514           |           |                                           |
| 1.35594           |           |                                           |
| 1.28822           |           |                                           |
| 1.26261           |           |                                           |
| 1.18528           |           |                                           |
| 1.16651           |           |                                           |
| 1.15464           |           |                                           |
| 1.12524           |           |                                           |
| 1.09387           |           |                                           |
| 1.08713           |           |                                           |
| 1.07374           |           |                                           |
| 1.01699           |           |                                           |

\_\_\_\_\_

\_\_\_\_\_



\_\_\_\_\_

|

[GO Accession: GO:0050896](#)

**Ontology: Biological Process**

**Description: response to stimulus**

**Annotated/Total number in query list: 159/899**

ance: 27/31819

**Annotated/Total number in background/reference**

| log2(fold_change) | ID        | Description                             |
|-------------------|-----------|-----------------------------------------|
| 3.15638           | AT3G63375 | ----                                    |
| 1.96538           | AT4G34780 | SAUR-like auxin-responsive protein fam  |
| 1.90882           | AT4G37990 | ELI3-2, ELI3, ATCAD8, CAD-B2 elicitor-a |
| 1.69777           | AT4G34800 | SAUR-like auxin-responsive protein fam  |
| 1.65771           | AT3G44300 | NIT2, AtNIT2 nitrilase 2                |
| 1.54878           | AT2G24210 | TPS10 terpene synthase 10               |
| 1.41962           | AT5G24770 | VSP2, ATVSP2 vegetative storage prote   |
| 1.18991           | AT1G28480 | GRX480, roxy19 Thioredoxin superfami    |
| 1.15482           | AT5G24780 | VSP1, ATVSP1 vegetative storage prote   |
| 1.08316           | AT2G02990 | RNS1, ATRNS1 ribonuclease 1             |
| 1.08253           | AT4G16740 | ATTPS03, TPS03 terpene synthase 03      |
| 1.05889           | AT3G59220 | PRN, PRN1, ATPIRIN1 pirin               |
| 1.05358           | AT4G23680 | Polyketide cyclase/dehydrase and lipid  |
|                   | AT1G52040 | MBP1, ATMBP myrosinase-binding pro      |
|                   | AT5G07010 | ATST2A, ST2A sulfotransferase 2A        |
|                   | AT3G11480 | unknown protein; Has 23 Blast hits      |
|                   | AT2G43510 | ATTI1, TI1 trypsin inhibitor protein 1  |
|                   | AT5G59310 | LTP4 lipid transfer protein 4           |
|                   | AT1G52890 | ANAC019, NAC019 NAC domain contain      |
|                   | AT1G52030 | MBP2, MBP1, F-ATMBP myrosinase-bir      |
|                   | AT3G03190 | ATGSTF11, ATGSTF6, GSTF11 glutathior    |
|                   | AT2G42540 | COR15A, COR15 cold-regulated 15a        |
|                   | AT3G20470 | GRP-5, ATGRP-5, GRP5, ATGRP5 glycine    |
|                   | AT3G16470 | JR1 Mannose-binding lectin superfamil   |
|                   | AT4G37150 | ATMES9, MES9 methyl esterase 9          |
|                   | AT1G19610 | LCR78, PDF1 Arabidopsis defensin-like   |
|                   | AT1G07400 | HSP20-like chaperones superfamily pro   |
|                   | AT5G15960 | KIN1 stress-responsive protein (KIN1) / |
|                   | AT3G23250 | MYB15, ATY19, ATMYB15 myb domain        |
|                   | AT1G54050 | HSP20-like chaperones superfamily pro   |
|                   | AT4G23600 | CORI3, JR2 Tyrosine transaminase fami   |
|                   | AT2G44840 | ATERF13, EREBP, ERF13 ethylene-respc    |
|                   | AT2G30360 | CIPK11, PKS5, SIP4, SNRK32 SOS3-inter   |
|                   | AT1G05560 | UGT1, UGT75B1 UDP-glucosyltransfera     |
|                   | AT4G25000 | ATAMY1, AMY1 alpha-amylase-like         |

|           |                                           |
|-----------|-------------------------------------------|
| AT1G32640 | ATMYC2, RD22BP1, JAI1, JIN1, MYC2, Z      |
| AT3G09260 | PYK10, PSR3, BGLU23, LEB Glycosyl hyd     |
| AT1G43160 | RAP2 related to AP2 6                     |
| AT2G41070 | EEL, ATBZIP12, DPBF4 Basic-leucine zip    |
| AT2G06050 | OPR3 oxophytodienoate-reductase 3         |
| AT2G21660 | ATGRP7, CCR2, GR-RBP7, GRP7 cold, cir     |
| AT2G38750 | ANNAT4 annexin 4                          |
| AT2G34810 | FAD-binding Berberine family protein      |
| AT2G22080 | unknown protein; Has 96314 Blast hits     |
| AT1G18710 | AtMYB47, MYB47 myb domain protein         |
| AT2G43535 | Scorpion toxin-like knottin superfamily   |
| AT2G47180 | AtGolS1, GolS1 galactinol synthase 1      |
| AT5G59220 | HAI1 highly ABA-induced PP2C gene 1       |
| AT5G17490 | RGL3 RGA-like protein 3                   |
| AT1G56650 | PAP1, MYB75, SIAA1, ATMYB75               |
| ATCG00490 | RBCL ribulose-bisphosphate carboxylas     |
| AT4G15440 | HPL1, CYP74B2 hydroperoxide lyase 1       |
| AT3G26420 | ATRZ-1A RNA-binding (RRM/RBD/RNP i        |
| AT2G23620 | ATMES1, MES1 methyl esterase 1            |
| AT1G54040 | ESP, TASTY, ESR epithiospecifier protei   |
| AT3G16400 | ATMLP-470, NSP1, ATNSP1 nitrile speci     |
| AT5G07700 | MYB76, AtMYB76 myb domain protein         |
| AT5G59320 | LTP3 lipid transfer protein 3             |
| AT1G19670 | ATCLH1, COR11, ATHCOR1, CLH1 chloro       |
| AT2G45210 | SAUR-like auxin-responsive protein far    |
| AT5G16980 | Zinc-binding dehydrogenase family pro     |
| AT1G69260 | AFP1 ABI five binding protein             |
| AT5G59780 | MYB59, ATMYB59, ATMYB59-1 myb do          |
| AT5G15970 | KIN2, COR6 stress-responsive protein (I   |
| AT1G20030 | Pathogenesis-related thaumatin superf     |
| AT5G02200 | FHL far-red-elongated hypocotyl1-like     |
| AT4G15910 | ATDI21, DI21 drought-induced 21           |
| AT1G19570 | DHAR1, ATDHAR1, DHAR5 dehydroasc          |
| AT1G50460 | HKL1, ATHKL1 hexokinase-like 1            |
| AT3G45140 | LOX2, ATLOX2 lipoxygenase 2               |
| AT4G15210 | ATBETA-AMY, AT-BETA-AMY, RAM1, BI         |
| AT3G05640 | Protein phosphatase 2C family protein     |
| AT1G74430 | MYB95, ATMYB95, ATMYBCP66 myb dc          |
| AT2G42530 | COR15B cold regulated 15b                 |
| AT2G33380 | RD20, CLO-3 Caleosin-related family pr    |
| AT4G12480 | pEARLI 1 Bifunctional inhibitor/lipid-tra |

|           |                                         |
|-----------|-----------------------------------------|
| AT4G10390 | Protein kinase superfamily protein      |
| AT1G07610 | MT1C metallothionein 1C                 |
| AT4G24350 | Phosphorylase superfamily protein       |
| AT5G07690 | MYB29, ATMYB29, PMG2 myb domain         |
| AT2G32690 | ATGRP23, GRP23 glycine-rich protein 2   |
| AT2G05520 | GRP-3, ATGRP-3, GRP3, ATGRP3 glycine    |
| AT5G10300 | ATMES5, MES5, HNL methyl esterase 5     |
| AT2G29450 | ATGSTU5, ATGSTU1, AT103-1A, GSTU5       |
| AT1G74930 | ORA47 Integrase-type DNA-binding sup    |
| AT5G05690 | CPD, CYP90A, CYP90, CBB3, DWF3, CYP     |
| AT1G58848 | Disease resistance protein (CC-NBS-LRF  |
| AT1G19640 | JMT jasmonic acid carboxyl methyltran   |
| AT1G76180 | ERD14 Dehydrin family protein           |
| AT5G65050 | AGL31, MAF2 AGAMOUS-like 31             |
| AT1G17380 | JAZ5, TIFY11A jasmonate-zim-domain p    |
| AT5G44420 | PDF1, PDF1A, LCR77 plant defensin 1     |
| AT5G61600 | ERF104 ethylene response factor 104     |
| AT5G67480 | BT4, ATBT4 BTB and TAZ domain           |
| AT5G66400 | RAB18, ATDI8 Dehydrin family protein    |
| AT4G19230 | CYP707A1 Cytochrome P450                |
| AT2G27720 | 60S acidic ribosomal protein family     |
| AT5G42380 | CML39, CML37 calmodulin like 37         |
| AT2G42260 | UVI4, PYM uv-b-insensitive 4            |
| AT1G66100 | Plant thionin                           |
| AT5G67300 | ATMYBR1, ATMYB44, MYBR1, MYB44 n        |
| AT5G65420 | CYCD4;1 CYCLIN D4;1                     |
| AT2G22330 | CYP79B3 Cytochrome P450                 |
| AT2G43530 | Scorpion toxin-like knottin superfamily |
| AT5G52310 | COR78, LTI78, RD29A, LTI140 low-temp    |
| AT3G61190 | BAP1 BON association protein 1          |
| AT1G70700 | JAZ9, TIFY7 TIFY domain/Divergent CCT   |
| AT2G47190 | ATMYB2, MYB2 myb domain protein 2       |
| AT2G25930 | ELF3, PYK20 hydroxyproline-rich glycop  |
| AT1G30480 | DRT111 D111/G-patch domain-contain      |
| AT2G23560 | ATMES7, MES7 methyl esterase 7          |
| AT5G42820 | ATU2AF35B, U2AF35B Zinc finger C-x8-    |
| AT4G21910 | MATE efflux family protein              |
| AT1G77000 | ATSKP2;2, SKP2B RNI-like superfamily p  |
| AT2G39800 | P5CS1, ATP5CS delta1-pyrroline-5-carb   |
| AT2G26020 | PDF1b plant defensin 1b                 |
| AT1G66760 | MATE efflux family protein              |

|           |                                          |
|-----------|------------------------------------------|
| AT4G37000 | ACD2, ATRCCR accelerated cell death 2    |
| AT5G60430 | drug transmembrane transporters;anti     |
| AT1G58807 | Disease resistance protein (CC-NBS-LRF   |
| AT2G26740 | ATSEH, SEH soluble epoxide hydrolase     |
| AT3G15500 | ATNAC3, ANAC055, NAC055, NAC3 NAC        |
| AT5G05340 | Peroxidase superfamily protein           |
| AT5G54490 | PBP1 pinoid-binding protein 1            |
| AT1G01720 | ATAF1, ANAC002 NAC (No Apical Meris      |
| AT4G39030 | EDS5, SID1 MATE efflux family protein    |
| AT1G27650 | ATU2AF35A U2 snRNP auxiliary factor s    |
| AT1G29395 | COR414-TM1, COR413IM1, COR413-TM         |
| AT4G13770 | CYP83A1, REF2 cytochrome p450            |
| AT5G43170 | AZF3, ZF3 zinc-finger protein 3          |
| AT2G34600 | JAZ7, TIFY5B jasmonate-zim-domain pr     |
| AT2G23290 | AtMYB70, MYB70 myb domain protein        |
| AT2G41380 | S-adenosyl-L-methionine-dependent m      |
| AT1G54060 | ASIL1 6B-interacting protein 1-like 1    |
| AT3G16460 | Mannose-binding lectin superfamily pr    |
| AT2G37430 | C2H2 and C2HC zinc fingers superfamil    |
| AT1G51760 | IAR3, JR3 peptidase M20/M25/M40 far      |
| AT4G38680 | GRP2, CSDP2, CSP2, ATCSP2 glycine rich   |
| AT5G54810 | TSB1, TRPB, TRP2, ATTSB1 tryptophan :    |
| AT2G18050 | HIS1-3 histone H1-3                      |
| AT3G20390 | endoribonuclease L-PSP family protein    |
| AT3G46130 | ATMYB48, ATMYB48-3, MYB48 myb do         |
| AT2G23430 | ICK1, KRP1 Cyclin-dependent kinase inf   |
| AT2G29420 | ATGSTU7, GST25, GSTU7 glutathione S-     |
| AT5G37055 | ATSWC6, SEF HIT-type Zinc finger famil   |
| AT3G09940 | MDHAR, ATMDAR3, MDAR3, MDAR2 nr          |
| AT2G46270 | GBF3 G-box binding factor 3              |
| AT3G46620 | zinc finger (C3HC4-type RING finger) fa  |
| AT5G61900 | BON1, CPN1, BON Calcium-dependent        |
| AT4G13850 | ATGRP2, GR-RBP2, GRP2 glycine-rich RI    |
| AT3G50970 | LTI30, XERO2 dehydrin family protein     |
| AT4G34000 | ABF3, DPBF5 abscisic acid responsive e   |
| AT2G43550 | Scorpion toxin-like knottin superfamily  |
| AT3G62550 | Adenine nucleotide alpha hydrolases-li   |
| AT4G24220 | VEP1, AWI31 NAD(P)-binding Rossmann      |
| AT5G58070 | ATTIL, TIL temperature-induced lipocali  |
| AT3G55460 | SCL30, At-SCL30 SC35-like splicing factc |
| AT5G17520 | RCP1, MEX1 root cap 1 (RCP1)             |

|

AT4G13520

SMAP1 small acidic protein 1

[GO Accession: GO:0042221](#)

**Ontology:** Biological Process

**Description:** response to chemical stimulus

**Annotated/Total number in query list:** 96/899

**Count:** 985/31819

**Annotated/Total number in background/reference**

| log2(fold_change) | ID        | Description                                       |
|-------------------|-----------|---------------------------------------------------|
| 45.6873           | AT4G34780 | SAUR-like auxin-responsive protein family         |
| 4.43433           | AT4G34800 | SAUR-like auxin-responsive protein family         |
| 3.85242           | AT2G24210 | TPS10 terpene synthase 10                         |
| 3.63278           | AT5G24770 | VSP2, ATVSP2 vegetative storage protein 2         |
| 3.45531           | AT1G28480 | GRX480, roxy19 Thioredoxin superfamily protei     |
| 3.39559           | AT5G24780 | VSP1, ATVSP1 vegetative storage protein 1         |
| 3.15638           | AT2G02990 | RNS1, ATRNS1 ribonuclease 1                       |
| 3.14265           | AT3G59220 | PRN, PRN1, ATPIRIN1 pirin                         |
| 3.12987           | AT5G07010 | ATST2A, ST2A sulfotransferase 2A                  |
| 2.96913           | AT5G59310 | LTP4 lipid transfer protein 4                     |
| 2.79044           | AT1G52890 | ANAC019, NAC019 NAC domain containing prot        |
| 2.70247           | AT3G03190 | ATGSTF11, ATGSTF6, GSTF11 glutathione S-tran      |
| 2.59817           | AT3G20470 | GRP-5, ATGRP-5, GRP5, ATGRP5 glycine-rich prc     |
| 2.56372           | AT3G16470 | JR1 Mannose-binding lectin superfamily protein    |
| 2.55272           | AT1G07400 | HSP20-like chaperones superfamily protein         |
| 2.33413           | AT5G15960 | KIN1 stress-responsive protein (KIN1) / stress-in |
| 2.27947           | AT3G23250 | MYB15, ATY19, ATMYB15 myb domain protein          |
| 2.21629           | AT1G54050 | HSP20-like chaperones superfamily protein         |
| 2.20315           | AT4G23600 | COR13, JR2 Tyrosine transaminase family protei    |
| 2.19977           | AT2G44840 | ATERF13, EREBP, ERF13 ethylene-responsive ele     |
| 2.14509           | AT1G05560 | UGT1, UGT75B1 UDP-glucosyltransferase 75B1        |
| 2.12301           | AT4G25000 | ATAMY1, AMY1 alpha-amylase-like                   |
| 2.11075           | AT1G32640 | ATMYC2, RD22BP1, JAI1, JIN1, MYC2, ZBF1           |
| 2.04482           | AT2G41070 | EEL, ATBZIP12, DPBF4 Basic-leucine zipper (bZIP   |
| 2.04376           | AT2G06050 | OPR3 oxophytodienoate-reductase 3                 |
| 2.03939           | AT2G38750 | ANNAT4 annexin 4                                  |
| 1.99185           | AT2G34810 | FAD-binding Berberine family protein              |
| 1.98703           | AT2G22080 | unknown protein; Has 96314 Blast hits             |
| 1.96538           | AT1G18710 | AtMYB47, MYB47 myb domain protein 47              |
| 1.90882           | AT2G47180 | AtGolS1, GolS1 galactinol synthase 1              |
| 1.86974           | AT5G59220 | HAI1 highly ABA-induced PP2C gene 1               |
| 1.86582           | AT5G17490 | RGL3 RGA-like protein 3                           |
| 1.86233           | AT1G56650 | PAP1, MYB75, SIAA1, ATMYB75                       |
| 1.85097           | ATCG00490 | RBCL ribulose-bisphosphate carboxylases           |
| 1.84087           | AT1G54040 | ESP, TASTY, ESR epithiospecifier protein          |



|         |           |                                                 |
|---------|-----------|-------------------------------------------------|
| 1.83347 | AT5G07700 | MYB76, AtMYB76 myb domain protein 76            |
| 1.7732  | AT5G59320 | LTP3 lipid transfer protein 3                   |
| 1.77261 | AT2G45210 | SAUR-like auxin-responsive protein family       |
| 1.76315 | AT5G16980 | Zinc-binding dehydrogenase family protein       |
| 1.76284 | AT1G69260 | AFP1 ABI five binding protein                   |
| 1.76051 | AT5G59780 | MYB59, ATMYB59, ATMYB59-1 myb domain prc        |
| 1.75456 | AT5G15970 | KIN2, COR6 stress-responsive protein (KIN2) /   |
| 1.71555 | AT4G15910 | ATDI21, DI21 drought-induced 21                 |
| 1.70653 | AT1G19570 | DHAR1, ATDHAR1, DHAR5 dehydroascorbate re       |
| 1.70289 | AT3G45140 | LOX2, ATLOX2 lipoxygenase 2                     |
| 1.69972 | AT3G05640 | Protein phosphatase 2C family protein           |
| 1.69777 | AT1G74430 | MYB95, ATMYB95, ATMYBCP66 myb domain pr         |
| 1.68068 | AT2G33380 | RD20, CLO-3 Caleosin-related family protein     |
| 1.66102 | AT1G07610 | MT1C metallothionein 1C                         |
| 1.65771 | AT5G07690 | MYB29, ATMYB29, PMG2 myb domain protein         |
| 1.65291 | AT2G32690 | ATGRP23, GRP23 glycine-rich protein 23          |
| 1.64373 | AT2G05520 | GRP-3, ATGRP-3, GRP3, ATGRP3 glycine-rich prc   |
| 1.62974 | AT2G29450 | ATGSTU5, ATGSTU1, AT103-1A, GSTU5 glutathic     |
| 1.61372 | AT1G19640 | JMT jasmonic acid carboxyl methyltransferase    |
| 1.61193 | AT1G76180 | ERD14 Dehydrin family protein                   |
| 1.58486 | AT1G17380 | JAZ5, TIFY11A jasmonate-zim-domain protein 5    |
| 1.57678 | AT5G44420 | PDF1, PDF1A, LCR77 plant defensin 1             |
| 1.56413 | AT5G67480 | BT4, ATBT4 BTB and TAZ domain                   |
| 1.5608  | AT5G66400 | RAB18, ATDI8 Dehydrin family protein            |
| 1.55906 | AT5G42380 | CML39, CML37 calmodulin like 37                 |
| 1.55457 | AT5G67300 | ATMYBR1, ATMYB44, MYBR1, MYB44 myb dom          |
| 1.55131 | AT5G65420 | CYCD4;1 CYCLIN D4;1                             |
| 1.54878 | AT5G52310 | COR78, LTI78, RD29A, LTI140 low-temperature-    |
| 1.54072 | AT3G61190 | BAP1 BON association protein 1                  |
| 1.53978 | AT1G70700 | JAZ9, TIFY7 TIFY domain/Divergent CCT motif     |
| 1.52682 | AT2G47190 | ATMYB2, MYB2 myb domain protein 2               |
| 1.51773 | AT2G25930 | ELF3, PYK20 hydroxyproline-rich glycoprotein fa |
| 1.5068  | AT4G21910 | MATE efflux family protein                      |
| 1.47731 | AT2G39800 | P5CS1, ATP5CS delta1-pyrroline-5-carboxylate s  |
| 1.46705 | AT5G60430 | drug transmembrane transporters;antiporters     |
| 1.45266 | AT2G26740 | ATSEH, SEH soluble epoxide hydrolase            |
| 1.43642 | AT3G15500 | ATNAC3, ANAC055, NAC055, NAC3 NAC domain        |
| 1.43569 | AT5G05340 | Peroxidase superfamily protein                  |
| 1.43547 | AT5G54490 | PBP1 pinoid-binding protein 1                   |
| 1.43225 | AT1G01720 | ATAF1, ANAC002 NAC (No Apical Meristem)         |
| 1.42336 | AT1G29395 | COR414-TM1, COR413IM1, COR413-TM1 COLD          |

|         |           |                                                 |
|---------|-----------|-------------------------------------------------|
| 1.42175 | AT5G43170 | AZF3, ZF3 zinc-finger protein 3                 |
| 1.41962 | AT2G34600 | JAZ7, TIFY5B jasmonate-zim-domain protein 7     |
| 1.39665 | AT2G23290 | AtMYB70, MYB70 myb domain protein 70            |
| 1.39232 | AT2G41380 | S-adenosyl-L-methionine-dependent methyltra     |
| 1.38519 | AT1G54060 | ASIL1 6B-interacting protein 1-like 1           |
| 1.38181 | AT2G37430 | C2H2 and C2HC zinc fingers superfamily          |
| 1.36514 | AT5G54810 | TSB1, TRPB, TRP2, ATTSB1 tryptophan synthase    |
| 1.35806 | AT2G18050 | HIS1-3 histone H1-3                             |
| 1.35594 | AT3G20390 | endoribonuclease L-PSP family protein           |
| 1.34001 | AT3G46130 | ATMYB48, ATMYB48-3, MYB48 myb domain pro        |
| 1.29601 | AT2G23430 | ICK1, KRP1 Cyclin-dependent kinase inhibitor fa |
| 1.28822 | AT2G29420 | ATGSTU7, GST25, GSTU7 glutathione S-transfer    |
| 1.28492 | AT3G09940 | MDHAR, ATMDAR3, MDAR3, MDAR2 monodehy           |
| 1.28147 | AT2G46270 | GBF3 G-box binding factor 3                     |
| 1.27397 | AT3G46620 | zinc finger (C3HC4-type RING finger) family     |
| 1.26261 | AT5G61900 | BON1, CPN1, BON Calcium-dependent phospho       |
| 1.26214 | AT3G50970 | LTI30, XERO2 dehydrin family protein            |
| 1.24913 | AT4G34000 | ABF3, DPBF5 abscisic acid responsive elements-  |
| 1.24725 | AT3G55460 | SCL30, At-SCL30 SC35-like splicing factor 30    |
| 1.23777 | AT4G13520 | SMAP1 small acidic protein 1                    |
| 1.22207 |           |                                                 |
| 1.21267 |           |                                                 |
| 1.20131 |           |                                                 |
| 1.20016 |           |                                                 |
| 1.18991 |           |                                                 |
| 1.18572 |           |                                                 |
| 1.18528 |           |                                                 |
| 1.16868 |           |                                                 |
| 1.16667 |           |                                                 |
| 1.16651 |           |                                                 |
| 1.16581 |           |                                                 |
| 1.15482 |           |                                                 |
| 1.15464 |           |                                                 |
| 1.1458  |           |                                                 |
| 1.14371 |           |                                                 |
| 1.1342  |           |                                                 |
| 1.13253 |           |                                                 |
| 1.13058 |           |                                                 |
| 1.13015 |           |                                                 |
| 1.12661 |           |                                                 |
| 1.12524 |           |                                                 |

1.12311  
1.11818  
1.11664  
1.10371  
1.09833  
1.09607  
1.09545  
1.09387  
1.09045  
1.08867  
1.08713  
1.08569  
1.08569  
1.08527  
1.08316  
1.08253  
1.08115  
1.07626  
1.07592  
1.07374  
1.06675  
1.06539  
1.06144  
1.05889  
1.05358  
1.05064  
1.05023  
1.04813  
1.03407  
1.03183  
1.03134  
1.0296  
1.0276  
1.02636  
1.02184  
1.02093  
1.0193  
1.01699  
1.01675  
1.01309  
1.01155

1.00884

|

[GO Accession: GO:0009719](#)

**Ontology:** Biological Process

**Description:** response to endogenous stimulus

**Annotated/Total number in query list:** 67/899

Count: 439/31819

**Annotated/Total number in background/reference**

| log2(fold_change) | ID        | Description                                      |
|-------------------|-----------|--------------------------------------------------|
| 4.43433           | AT4G34780 | SAUR-like auxin-responsive protein family        |
| 3.63278           | AT4G34800 | SAUR-like auxin-responsive protein family        |
| 3.39559           | AT2G24210 | TPS10 terpene synthase 10                        |
| 3.15638           | AT5G24770 | VSP2, ATVSP2 vegetative storage protein 2        |
| 3.14265           | AT1G28480 | GRX480, roxy19 Thioredoxin superfamily protein   |
| 3.12987           | AT5G24780 | VSP1, ATVSP1 vegetative storage protein 1        |
| 2.96913           | AT2G02990 | RNS1, ATRNS1 ribonuclease 1                      |
| 2.70247           | AT3G59220 | PRN, PRN1, ATPIRIN1 pirin                        |
| 2.55272           | AT5G07010 | ATST2A, ST2A sulfotransferase 2A                 |
| 2.21629           | AT5G59310 | LTP4 lipid transfer protein 4                    |
| 2.20315           | AT3G20470 | GRP-5, ATGRP-5, GRP5, ATGRP5 glycine-rich        |
| 2.14509           | AT3G16470 | JR1 Mannose-binding lectin superfamily protein   |
| 2.11075           | AT5G15960 | KIN1 stress-responsive protein (KIN1) / stress   |
| 2.04482           | AT3G23250 | MYB15, ATY19, ATMYB15 myb domain protein         |
| 1.99185           | AT4G23600 | COR13, JR2 Tyrosine transaminase family protein  |
| 1.98703           | AT2G44840 | ATERF13, EREBP, ERF13 ethylene-responsive        |
| 1.96538           | AT4G25000 | ATAMY1, AMY1 alpha-amylase-like                  |
| 1.90882           | AT1G32640 | ATMYC2, RD22BP1, JAI1, JIN1, MYC2, ZBF1          |
| 1.86974           | AT2G41070 | EEL, ATBZIP12, DPBF4 Basic-leucine zipper (bZIP) |
| 1.86582           | AT2G38750 | ANNAT4 annexin 4                                 |
| 1.85097           | AT2G34810 | FAD-binding Berberine family protein             |
| 1.84087           | AT1G18710 | AtMYB47, MYB47 myb domain protein 47             |
| 1.83347           | AT5G59220 | HAI1 highly ABA-induced PP2C gene 1              |
| 1.76315           | AT5G17490 | RGL3 RGA-like protein 3                          |
| 1.76284           | AT1G56650 | PAP1, MYB75, SIAA1, ATMYB75                      |
| 1.75456           | ATCG00490 | RBCL ribulose-bisphosphate carboxylases          |
| 1.71555           | AT1G54040 | ESP, TASTY, ESR epithiospecifier protein         |
| 1.70653           | AT5G07700 | MYB76, AtMYB76 myb domain protein 76             |
| 1.70289           | AT5G59320 | LTP3 lipid transfer protein 3                    |
| 1.69777           | AT2G45210 | SAUR-like auxin-responsive protein family        |
| 1.68068           | AT1G69260 | AFP1 ABI five binding protein                    |
| 1.66102           | AT5G59780 | MYB59, ATMYB59, ATMYB59-1 myb domain             |
| 1.65771           | AT5G15970 | KIN2, COR6 stress-responsive protein (KIN2)      |
| 1.65291           | AT4G15910 | ATDI21, DI21 drought-induced 21                  |
| 1.61193           | AT1G19570 | DHAR1, ATDHAR1, DHAR5 dehydroascorbate           |

1.57678

1.56413

1.55906

1.55457

1.55131

1.54878

1.54072

1.51773

1.5068

1.46705

1.43642

1.43569

1.43225

1.41962

1.39232

1.38519

1.38181

1.35806

1.28822

1.28492

1.27397

1.26261

1.24913

1.24725

1.21267

1.18991

1.18572

1.16667

1.16651

1.16581

1.15482

1.15464

1.13253

1.13015

1.11818

1.10371

1.09833

1.09607

1.09545

1.09387

1.08713

|           |                                              |
|-----------|----------------------------------------------|
| AT3G45140 | LOX2, ATLOX2 lipoxygenase 2                  |
| AT1G74430 | MYB95, ATMYB95, ATMYBCP66 myb domain         |
| AT2G33380 | RD20, CLO-3 Caleosin-related family protein  |
| AT5G07690 | MYB29, ATMYB29, PMG2 myb domain prote        |
| AT2G32690 | ATGRP23, GRP23 glycine-rich protein 23       |
| AT2G05520 | GRP-3, ATGRP-3, GRP3, ATGRP3 glycine-rich    |
| AT1G19640 | JMT jasmonic acid carboxyl methyltransferase |
| AT1G76180 | ERD14 Dehydrin family protein                |
| AT1G17380 | JAZ5, TIFY11A jasmonate-zim-domain protei    |
| AT5G44420 | PDF1, PDF1A, LCR77 plant defensin 1          |
| AT5G67480 | BT4, ATBT4 BTB and TAZ domain                |
| AT5G66400 | RAB18, ATDI8 Dehydrin family protein         |
| AT5G67300 | ATMYBR1, ATMYB44, MYBR1, MYB44 myb d         |
| AT5G52310 | COR78, LTI78, RD29A, LTI140 low-temperatu    |
| AT1G70700 | JAZ9, TIFY7 TIFY domain/Divergent CCT moti   |
| AT2G47190 | ATMYB2, MYB2 myb domain protein 2            |
| AT2G25930 | ELF3, PYK20 hydroxyproline-rich glycoprotei  |
| AT2G39800 | P5CS1, ATP5CS delta1-pyrroline-5-carboxyla   |
| AT2G26740 | ATSEH, SEH soluble epoxide hydrolase         |
| AT3G15500 | ATNAC3, ANAC055, NAC055, NAC3 NAC dom        |
| AT5G54490 | PBP1 pinoid-binding protein 1                |
| AT1G01720 | ATAF1, ANAC002 NAC (No Apical Meristem)      |
| AT1G29395 | COR414-TM1, COR413IM1, COR413-TM1 CC         |
| AT2G34600 | JAZ7, TIFY5B jasmonate-zim-domain protein    |
| AT1G54060 | ASIL1 6B-interacting protein 1-like 1        |
| AT3G46130 | ATMYB48, ATMYB48-3, MYB48 myb domain         |
| AT2G23430 | ICK1, KRP1 Cyclin-dependent kinase inhibito  |
| AT3G09940 | MDHAR, ATMDAR3, MDAR3, MDAR2 monoc           |
| AT2G46270 | GBF3 G-box binding factor 3                  |
| AT3G50970 | LTI30, XERO2 dehydrin family protein         |
| AT4G34000 | ABF3, DPBF5 abscisic acid responsive eleme   |
| AT4G13520 | SMAP1 small acidic protein 1                 |

1.08569  
1.08527  
1.08316  
1.08253  
1.08115  
1.07592  
1.06539  
1.06144  
1.05889  
1.05358  
1.05064  
1.05023  
1.03407  
1.03183  
1.03134  
1.0296  
1.02636  
1.02184  
1.01309  
1.00884







[GO Accession: GO:0010033](#)

**Ontology:** Biological Process

**Description:** response to organic substance

**Annotated/Total number in query list:** 74/899

ance: 820/31819

**Annotated/Total number in background/reference:** 210

| log2(fold_change) | ID        | Description                                                     |
|-------------------|-----------|-----------------------------------------------------------------|
| 4.43433           | AT4G34780 | SAUR-like auxin-responsive protein family                       |
| 3.63278           | AT4G34800 | SAUR-like auxin-responsive protein family                       |
| 3.39559           | AT2G24210 | TPS10 terpene synthase 10                                       |
| 3.15638           | AT5G24770 | VSP2, ATVSP2 vegetative storage protein 2                       |
| 3.14265           | AT1G28480 | GRX480, roxy19 Thioredoxin superfamily protein                  |
| 3.12987           | AT5G24780 | VSP1, ATVSP1 vegetative storage protein 1                       |
| 2.96913           | AT2G02990 | RNS1, ATRNS1 ribonuclease 1                                     |
| 2.70247           | AT3G59220 | PRN, PRN1, ATPIRIN1 pirin                                       |
| 2.55272           | AT5G07010 | ATST2A, ST2A sulfotransferase 2A                                |
| 2.21629           | AT3G20470 | GRP-5, ATGRP-5, GRP5, ATGRP5 glycine-rich protein               |
| 2.11075           | AT3G16470 | JR1 Mannose-binding lectin superfamily protein                  |
| 2.04482           | AT5G15960 | KIN1 stress-responsive protein (KIN1) / stress-inducible        |
| 1.98703           | AT3G23250 | MYB15, ATY19, ATMYB15 myb domain protein                        |
| 1.96538           | AT4G23600 | CORI3, JR2 Tyrosine transaminase family protein                 |
| 1.86974           | AT2G44840 | ERF13, EREBP, ERF13 ethylene-responsive element binding factor  |
| 1.86582           | AT1G05560 | UGT1, UGT75B1 UDP-glucosyltransferase 75B1                      |
| 1.84087           | AT4G25000 | ATAMY1, AMY1 alpha-amylase-like                                 |
| 1.83347           | AT2G41070 | EEL, ATBZIP12, DPBF4 Basic-leucine zipper (bZIP) family protein |
| 1.76315           | AT2G34810 | FAD-binding Berberine family protein                            |
| 1.75456           | AT1G18710 | AtMYB47, MYB47 myb domain protein 47                            |
| 1.71555           | AT5G59220 | HAI1 highly ABA-induced PP2C gene 1                             |
| 1.70289           | AT5G17490 | RGL3 RGA-like protein 3                                         |
| 1.68068           | AT1G56650 | PAP1, MYB75, SIAA1, ATMYB75                                     |
| 1.66102           | ATCG00490 | RBCL ribulose-bisphosphate carboxylases                         |
| 1.65771           | AT1G54040 | ESP, TASTY, ESR epithiospecifier protein                        |
| 1.65291           | AT5G07700 | MYB76, AtMYB76 myb domain protein 76                            |
| 1.61193           | AT5G59320 | LTP3 lipid transfer protein 3                                   |
| 1.57678           | AT2G45210 | SAUR-like auxin-responsive protein family                       |
| 1.56413           | AT1G69260 | AFP1 ABI five binding protein                                   |
| 1.55906           | AT5G59780 | MYB59, ATMYB59, ATMYB59-1 myb domain protein                    |
| 1.55131           | AT5G15970 | KIN2, COR6 stress-responsive protein (KIN2) /                   |
| 1.54878           | AT4G15910 | ATI21, DI21 drought-induced 21                                  |
| 1.54072           | AT1G19570 | DHAR1, ATDHAR1, DHAR5 dehydroascorbate reductase                |
| 1.51773           | AT3G45140 | LOX2, ATLOX2 lipoxygenase 2                                     |
| 1.5068            | AT1G74430 | MYB95, ATMYB95, ATMYBCP66 myb domain protein                    |

|         |           |                                                     |
|---------|-----------|-----------------------------------------------------|
| 1.46705 | AT2G33380 | RD20, CLO-3 Caleosin-related family protein         |
| 1.43569 | AT2G32690 | ATGRP23, GRP23 glycine-rich protein 23              |
| 1.43225 | AT2G05520 | RP-3, ATGRP-3, GRP3, ATGRP3 glycine-rich prote      |
| 1.39232 | AT1G19640 | JMT jasmonic acid carboxyl methyltransferase        |
| 1.38519 | AT1G76180 | ERD14 Dehydrin family protein                       |
| 1.38181 | AT1G17380 | JAZ5, TIFY11A jasmonate-zim-domain protein 5        |
| 1.28822 | AT5G44420 | PDF1, PDF1A, LCR77 plant defensin 1                 |
| 1.28492 | AT5G67480 | BT4, ATBT4 BTB and TAZ domain                       |
| 1.27397 | AT5G66400 | RAB18, ATDI8 Dehydrin family protein                |
| 1.26261 | AT5G67300 | ATMYB1, ATMYB44, MYB1, MYB44 myb domai              |
| 1.24913 | AT5G65420 | CYCD4;1 CYCLIN D4;1                                 |
| 1.24725 | AT5G52310 | LTI78, RD29A, LTI140 low-temperature-respons        |
| 1.18991 | AT3G61190 | BAP1 BON association protein 1                      |
| 1.16667 | AT1G70700 | JAZ9, TIFY7 TIFY domain/Divergent CCT motif         |
| 1.16581 | AT2G47190 | ATMYB2, MYB2 myb domain protein 2                   |
| 1.15482 | AT2G25930 | PYK20 hydroxyproline-rich glycoprotein family p     |
| 1.15464 | AT2G39800 | delta1, ATP5CS delta1-pyrroline-5-carboxylate synth |
| 1.13015 | AT2G26740 | ATSEH, SEH soluble epoxide hydrolase                |
| 1.10371 | AT3G15500 | ATNAC3, ANAC055, NAC055, NAC3 NAC domain            |
| 1.09833 | AT5G54490 | PBP1 pinoid-binding protein 1                       |
| 1.09545 | AT1G01720 | ATAF1, ANAC002 NAC (No Apical Meristem)             |
| 1.09387 | AT1G29395 | COR413-TM1, COR413IM1, COR413-TM1 COLD REGULA       |
| 1.08713 | AT5G43170 | AZF3, ZF3 zinc-finger protein 3                     |
| 1.08527 | AT2G34600 | JAZ7, TIFY5B jasmonate-zim-domain protein 7         |
| 1.08115 | AT1G54060 | ASIL1 6B-interacting protein 1-like 1               |
| 1.05358 | AT2G37430 | C2H2 and C2HC zinc fingers superfamily              |
| 1.05064 | AT3G46130 | ATMYB48, ATMYB48-3, MYB48 myb domain prote          |
| 1.03407 | AT2G23430 | KRP1, KRP1 Cyclin-dependent kinase inhibitor fami   |
| 1.03183 | AT2G29420 | GSTU7, GST25, GSTU7 glutathione S-transferase       |
| 1.02636 | AT3G09940 | MDAR3, MDAR3, MDAR2 monodehydroascorba              |
| 1.02184 | AT2G46270 | GBF3 G-box binding factor 3                         |
| 1.00884 | AT3G46620 | zinc finger (C3HC4-type RING finger) family         |
|         | AT4G34000 | DPBF5 abscisic acid responsive elements-binc        |
|         | AT4G13520 | SMAP1 small acidic protein 1                        |

\_\_\_\_\_

\_\_\_\_\_

|

[GO Accession: GO:](#)

**Ontology:** Biol

**Description:** r

**Annotated/To**

**Annotated/To**

/31819

| log2(fold_change) | ID        |
|-------------------|-----------|
| 4.43433           | AT2G24210 |
| 3.63278           | AT5G24770 |
| 3.39559           | AT2G02990 |
| 3.15638           | AT4G16740 |
| 3.14265           | AT3G11480 |
| 3.12987           | AT1G52030 |
| 2.96913           | AT3G16470 |
| 2.70247           | AT4G23600 |
| 2.55272           | AT1G32640 |
| 2.11075           | AT1G43160 |
| 2.04482           | AT2G06050 |
| 1.98703           | AT2G34810 |
| 1.96538           | AT4G15440 |
| 1.86974           | AT3G45140 |
| 1.86582           | AT4G10390 |
| 1.85097           | AT4G24350 |
| 1.84087           | AT5G10300 |
| 1.76315           | AT1G74930 |
| 1.71555           | AT1G19640 |
| 1.70289           | AT5G44420 |
| 1.68068           | AT2G22330 |
| 1.66102           | AT3G61190 |
| 1.65771           | AT1G66760 |
| 1.65291           | AT1G01720 |
| 1.61193           | AT1G51760 |
| 1.57678           | AT4G24220 |
| 1.56413           |           |
| 1.55906           |           |
| 1.55131           |           |
| 1.54878           |           |
| 1.54072           |           |
| 1.51773           |           |
| 1.5068            |           |
| 1.46705           |           |
| 1.43569           |           |

1.43225  
1.38519  
1.38181  
1.28822  
1.28492  
1.27397  
1.26261  
1.24913  
1.24725  
1.18991  
1.18572  
1.16667  
1.16651  
1.16581  
1.15482  
1.15464  
1.13015  
1.10371  
1.09833  
1.09545  
1.09387  
1.08713  
1.08569  
1.08527  
1.08115  
1.07592  
1.05358  
1.05064  
1.05023  
1.03407  
1.03183  
1.03134  
1.02184  
1.00884



\_\_\_\_\_

\_\_\_\_\_



[J009611](#)

ogical Process

esponse to wounding

total number in query list: 26/899

total number in background/reference: 30/31819

| Description                                                | log2(fold_change) |
|------------------------------------------------------------|-------------------|
| TPS10 terpene synthase 10                                  | 3.39559           |
| VSP2, ATVSP2 vegetative storage protein 2                  | 3.15638           |
| RNS1, ATRNS1 ribonuclease 1                                | 2.96913           |
| ATTPS03, TPS03 terpene synthase 03                         | 2.79044           |
| unknown protein; Has 23 Blast hits                         | 2.33413           |
| MBP2, MBP1, F-ATMBP myrosinase-binding protein 2           | 2.19977           |
| JR1 Mannose-binding lectin superfamily protein             | 2.04482           |
| CORI3, JR2 Tyrosine transaminase family protein            | 1.86974           |
| ATMYC2, RD22BP1, JAI1, JIN1, MYC2, ZBF1                    | 1.83347           |
| RAP2 related to AP2 6                                      | 1.77261           |
| OPR3 oxophytodienoate-reductase 3                          | 1.76284           |
| FAD-binding Berberine family protein                       | 1.71555           |
| HPL1, CYP74B2 hydroperoxide lyase 1                        | 1.64373           |
| LOX2, ATLOX2 lipoxygenase 2                                | 1.46705           |
| Protein kinase superfamily protein                         | 1.42175           |
| Phosphorylase superfamily protein                          | 1.39665           |
| ATMES5, MES5, HNL methyl esterase 5                        | 1.36514           |
| ORA47 Integrase-type DNA-binding superfamily protein       | 1.35594           |
| JMT jasmonic acid carboxyl methyltransferase               | 1.28822           |
| PDF1, PDF1A, LCR77 plant defensin 1                        | 1.26261           |
| CYP79B3 Cytochrome P450                                    | 1.18528           |
| BAP1 BON association protein 1                             | 1.16651           |
| MATE efflux family protein                                 | 1.12524           |
| ATAF1, ANAC002 NAC (No Apical Meristem)                    | 1.09387           |
| IAR3, JR3 peptidase M20/M25/M40 family protein             | 1.07374           |
| VEP1, AWI31 NAD(P)-binding Rossmann-fold superfamily prote | 1.01699           |

\_\_\_\_\_

\_\_\_\_\_

\_\_\_\_\_





[GO Accession: GO:0009415](#)

**Ontology:** Biological Process

**Description:** response to water

**Annotated/Total number in query list:** 26/899

**Annotated/Total number in background/reference**

| <b>ID</b> | <b>Description</b>                                 |
|-----------|----------------------------------------------------|
| AT5G59310 | LTP4 lipid transfer protein 4                      |
| AT1G52890 | ANAC019, NAC019 NAC domain containing protein      |
| AT5G15960 | N1 stress-responsive protein (KIN1) / stress-induc |
| AT1G32640 | ATMYC2, RD22BP1, JAI1, JIN1, MYC2, ZBF1            |
| AT5G59220 | HAI1 highly ABA-induced PP2C gene 1                |
| AT5G59320 | LTP3 lipid transfer protein 3                      |
| AT5G15970 | KIN2, COR6 stress-responsive protein (KIN2) /      |
| AT4G15910 | ATDI21, DI21 drought-induced 21                    |
| AT3G45140 | LOX2, ATLOX2 lipoxygenase 2                        |
| AT3G05640 | Protein phosphatase 2C family protein              |
| AT2G33380 | RD20, CLO-3 Calciosin-related family protein       |
| AT2G05520 | GRP-3, ATGRP-3, GRP3, ATGRP3 glycine-rich protein  |
| AT1G76180 | ERD14 Dehydrin family protein                      |
| AT5G66400 | RAB18, ATDI8 Dehydrin family protein               |
| AT5G67300 | ATMYBR1, ATMYB44, MYBR1, MYB44 myb domain          |
| AT5G52310 | LTI78, RD29A, LTI140 low-temperature-responsi      |
| AT2G47190 | ATMYB2, MYB2 myb domain protein 2                  |
| AT2G39800 | S1, ATP5CS delta1-pyrroline-5-carboxylate syntha   |
| AT2G26740 | ATSEH, SEH soluble epoxide hydrolase               |
| AT3G15500 | ATNAC3, ANAC055, NAC055, NAC3 NAC domain           |
| AT1G29395 | COR413-TM1, COR413IM1, COR413-TM1 COLD REGULAT     |
| AT2G18050 | HIS1-3 histone H1-3                                |
| AT3G09940 | TMDAR3, MDAR3, MDAR2 monodehydroascorbat           |
| AT5G61900 | BON1, BON Calcium-dependent phospholipid-bind      |
| AT3G50970 | LTI30, XERO2 dehydrin family protein               |
| AT4G34000 | DPBF5 abscisic acid responsive elements-bindin     |









e: 37/31819

[GO Accession: GO:000](#)

**Ontology: Biolog**

**Description: resp**

**Annotated/Total**

**Annotated/Total**

| <b>log2(fold_change)</b> | <b>ID</b> |
|--------------------------|-----------|
| 2.21629                  | AT4G37990 |
| 2.20315                  | AT2G24210 |
| 1.98703                  | AT5G24770 |
| 1.83347                  | AT5G24780 |
| 1.68068                  | AT2G02990 |
| 1.56413                  | AT4G16740 |
| 1.54072                  | AT4G23680 |
| 1.51773                  | AT1G52040 |
| 1.46705                  | AT3G11480 |
| 1.43642                  | AT2G43510 |
| 1.43225                  | AT5G59310 |
| 1.38181                  | AT1G52890 |
| 1.28492                  | AT1G52030 |
| 1.24725                  | AT3G03190 |
| 1.18991                  | AT2G42540 |
| 1.16667                  | AT3G16470 |
| 1.15482                  | AT4G37150 |
| 1.13015                  | AT1G19610 |
| 1.10371                  | AT1G07400 |
| 1.09833                  | AT5G15960 |
| 1.08713                  | AT3G23250 |
| 1.06144                  | AT1G54050 |
| 1.03407                  | AT4G23600 |
| 1.0296                   | AT1G32640 |
| 1.02636                  | AT1G43160 |
| 1.02184                  | AT2G06050 |
|                          | AT2G21660 |
|                          | AT2G38750 |
|                          | AT2G34810 |
|                          | AT2G22080 |
|                          | AT1G18710 |
|                          | AT2G43535 |
|                          | AT2G47180 |
|                          | AT5G59220 |
|                          | AT1G56650 |

AT4G15440

AT3G26420

AT2G23620

AT1G54040

AT5G59320

AT1G19670

AT5G16980

AT5G59780

AT5G15970

AT4G15910

AT1G50460

AT3G45140

AT3G05640

AT2G42530

AT2G33380

AT4G12480

AT4G10390

AT4G24350

AT5G07690

AT2G05520

AT5G10300

AT2G29450

AT1G74930

AT1G58848

AT1G19640

AT1G76180

AT5G65050

AT5G44420

AT5G61600

AT5G66400

AT2G27720

AT1G66100

AT5G67300

AT2G22330

AT2G43530

AT5G52310

AT3G61190

AT2G47190

AT2G25930

AT1G30480

AT2G23560

AT1G77000  
AT2G39800  
AT2G26020  
AT1G66760  
AT4G37000  
AT1G58807  
AT2G26740  
AT3G15500  
AT5G05340  
AT1G01720  
AT4G39030  
AT1G29395  
AT5G43170  
AT2G23290  
AT3G16460  
AT1G51760  
AT4G38680  
AT5G54810  
AT2G18050  
AT3G46130  
AT5G37055  
AT3G09940  
AT5G61900  
AT4G13850  
AT3G50970  
AT4G34000  
AT2G43550  
AT3G62550  
AT4G24220  
AT5G58070  
AT3G55460



\_\_\_\_\_



6950

Biological Process

Response to stress

number in query list: 107/899

number in background/reference: 456/31819

GO Accession: GO

Ontology: Biological Process

Description: response to stress

Number of genes annotated/Total genes

Number of genes annotated/Total genes

| Description                                                          | log2(fold_change) | ID        |
|----------------------------------------------------------------------|-------------------|-----------|
| GLUCANASE2, ELI3, ATCAD8, CAD-B2 elicitor-activated protein 2        | 3.85242           | AT2G24210 |
| TPS10 terpene synthase 10                                            | 3.39559           | AT5G24770 |
| VSP2, ATVSP2 vegetative storage protein 2                            | 3.15638           | AT5G24780 |
| VSP1, ATVSP1 vegetative storage protein 1                            | 3.12987           | AT5G07010 |
| RNS1, ATRNS1 ribonuclease 1                                          | 2.96913           | AT3G16470 |
| ATTPS03, TPS03 terpene synthase 03                                   | 2.79044           | AT3G23250 |
| GLYCEROL-3-phosphate cyclase/dehydrase and lipid transport subunit 1 | 2.59817           | AT4G23600 |
| MBP1, ATMBP myrosinase-binding protein 1                             | 2.56372           | AT1G32640 |
| unknown protein; Has 23 Blast hits                                   | 2.33413           | AT2G34810 |
| ATTI1, TI1 trypsin inhibitor protein 1                               | 2.27947           | AT1G18710 |
| LTP4 lipid transfer protein 4                                        | 2.21629           | AT1G56650 |
| NAC019, NAC019 NAC domain containing protein 19                      | 2.20315           | AT1G54040 |
| MBP1, F-ATMBP myrosinase-binding protein 1                           | 2.19977           | AT5G07700 |
| GSTF11, ATGSTF6, GSTF11 glutathione S-transferase 11                 | 2.14509           | AT1G19570 |
| COR15A, COR15 cold-regulated 15a                                     | 2.12301           | AT3G45140 |
| Mannose-binding lectin superfamily protein 9                         | 2.04482           | AT1G74430 |
| ATMES9, MES9 methyl esterase 9                                       | 2.04376           | AT5G07690 |
| PDF1, PDF1 Arabidopsis defensin-like protein 1                       | 2.03939           | AT1G19640 |
| HSP20-like chaperones superfamily protein 1                          | 1.99185           | AT1G17380 |
| stress-responsive protein (KIN1) / stress-inducible protein 1        | 1.98703           | AT5G44420 |
| MYB15, ATY19, ATMYB15 myb domain protein 15                          | 1.96538           | AT5G67300 |
| HSP20-like chaperones superfamily protein 1                          | 1.90882           | AT1G70700 |
| JR13, JR2 Tyrosine transaminase family protein 13                    | 1.86974           | AT3G15500 |
| ATMYC2, RD22BP1, JAI1, JIN1, MYC2, ZBF1                              | 1.83347           | AT2G34600 |
| RAP2 related to AP2 6                                                | 1.77261           | AT3G46130 |
| OPR3 oxophytodienoate-reductase 3                                    | 1.76284           | AT3G09940 |
| TGRP7, CCR2, GR-RBP7, GRP7 cold, circadian rhythm protein 7          | 1.76051           |           |
| ANNAT4 annexin 4                                                     | 1.75456           |           |
| FAD-binding Berberine family protein 1                               | 1.71555           |           |
| unknown protein; Has 96314 Blast hits                                | 1.70653           |           |
| AtMYB47, MYB47 myb domain protein 47                                 | 1.70289           |           |
| Scorpion toxin-like knottin superfamily protein 1                    | 1.69972           |           |
| AtGolS1, GolS1 galactinol synthase 1                                 | 1.69777           |           |
| HAI1 highly ABA-induced PP2C gene 1                                  | 1.68068           |           |
| PAP1, MYB75, SIAA1, ATMYB75                                          | 1.65771           |           |

|                                                  |         |
|--------------------------------------------------|---------|
| HPL1, CYP74B2 hydroperoxide lyase 1              | 1.64373 |
| RNA-binding (RRM/RBD/RNP motifs) family          | 1.62974 |
| ATMES1, MES1 methyl esterase 1                   | 1.61372 |
| ESP, TASTY, ESR epithiospecifier protein         | 1.61193 |
| LTP3 lipid transfer protein 3                    | 1.56413 |
| CLH1, COR11, ATHCOR1, CLH1 chlorophyllase        | 1.5608  |
| Zinc-binding dehydrogenase family protein        | 1.55457 |
| 59, ATMYB59, ATMYB59-1 myb domain protein        | 1.54878 |
| IN2, COR6 stress-responsive protein (KIN2)       | 1.54072 |
| ATDI21, DI21 drought-induced 21                  | 1.51773 |
| HKL1, ATHKL1 hexokinase-like 1                   | 1.47731 |
| LOX2, ATLOX2 lipoxygenase 2                      | 1.46705 |
| Protein phosphatase 2C family protein            | 1.43642 |
| COR15B cold regulated 15b                        | 1.43547 |
| RD20, CLO-3 Caleosin-related family protein      | 1.43225 |
| 1 Bifunctional inhibitor/lipid-transfer protein  | 1.42336 |
| Protein kinase superfamily protein               | 1.42175 |
| Phosphorylase superfamily protein                | 1.39665 |
| IYB29, ATMYB29, PMG2 myb domain protein          | 1.39232 |
| -3, ATGRP-3, GRP3, ATGRP3 glycine-rich protein   | 1.38181 |
| ATMES5, MES5, HNL methyl esterase 5              | 1.36514 |
| ATGSTU1, AT103-1A, GSTU5 glutathione S-          | 1.35806 |
| 7 Integrase-type DNA-binding superfamily protein | 1.35594 |
| ase resistance protein (CC-NBS-LRR class) family | 1.29601 |
| VT jasmonic acid carboxyl methyltransferase      | 1.28822 |
| ERD14 Dehydrin family protein                    | 1.28492 |
| AGL31, MAF2 AGAMOUS-like 31                      | 1.28147 |
| PDF1, PDF1A, LCR77 plant defensin 1              | 1.26261 |
| ERF104 ethylene response factor 104              | 1.26214 |
| RAB18, ATDI8 Dehydrin family protein             | 1.24725 |
| 60S acidic ribosomal protein family              | 1.22207 |
| Plant thionin                                    | 1.20016 |
| MYBR1, ATMYB44, MYBR1, MYB44 myb domain          | 1.18991 |
| CYP79B3 Cytochrome P450                          | 1.18528 |
| Scorpion toxin-like knottin superfamily protein  | 1.16868 |
| TI78, RD29A, LTI140 low-temperature-resistance   | 1.16667 |
| BAP1 BON association protein 1                   | 1.16651 |
| ATMYB2, MYB2 myb domain protein 2                | 1.15482 |
| YK20 hydroxyproline-rich glycoprotein family     | 1.15464 |
| TI11 D111/G-patch domain-containing protein      | 1.1458  |
| ATMES7, MES7 methyl esterase 7                   | 1.14371 |

|                                              |         |
|----------------------------------------------|---------|
| .TSKP2;2, SKP2B RNI-like superfamily protei  | 1.13058 |
| ATP5CS delta1-pyrroline-5-carboxylate syn    | 1.13015 |
| PDF1b plant defensin 1b                      | 1.12661 |
| MATE efflux family protein                   | 1.12524 |
| ACD2, ATRCCR accelerated cell death 2        | 1.12311 |
| ase resistance protein (CC-NBS-LRR class) fa | 1.11664 |
| ATSEH, SEH soluble epoxide hydrolase         | 1.10371 |
| NAC3, ANAC055, NAC055, NAC3 NAC doma         | 1.09833 |
| Peroxidase superfamily protein               | 1.09607 |
| ATAF1, ANAC002 NAC (No Apical Meristem)      | 1.09387 |
| EDS5, SID1 MATE efflux family protein        | 1.09045 |
| M1, COR413IM1, COR413-TM1 COLD REGU          | 1.08713 |
| AZF3, ZF3 zinc-finger protein 3              | 1.08569 |
| AtMYB70, MYB70 myb domain protein 70         | 1.08316 |
| Mannose-binding lectin superfamily proteir   | 1.07626 |
| 3, JR3 peptidase M20/M25/M40 family pro      | 1.07374 |
| GRP2, CSDP2, CSP2, ATCSP2 glycine rich       | 1.06675 |
| B1, TRPB, TRP2, ATTSB1 tryptophan syntha     | 1.06539 |
| HIS1-3 histone H1-3                          | 1.06144 |
| MYB48, ATMYB48-3, MYB48 myb domain pro       | 1.05358 |
| ATSWC6, SEF HIT-type Zinc finger family      | 1.04813 |
| DAR3, MDAR3, MDAR2 monodehydroascor          | 1.03407 |
| 1, BON Calcium-dependent phospholipid-b      | 1.0296  |
| 2, GR-RBP2, GRP2 glycine-rich RNA-binding    | 1.0276  |
| LTI30, XERO2 dehydrin family protein         | 1.02636 |
| DPBF5 abscisic acid responsive elements-b    | 1.02184 |
| orpion toxin-like knottin superfamily prote  | 1.02093 |
| nucleotide alpha hydrolases-like superfam    | 1.0193  |
| 131 NAD(P)-binding Rossmann-fold superfa     | 1.01699 |
| ATTIL, TIL temperature-induced lipocalin     | 1.01675 |
| SCL30, At-SCL30 SC35-like splicing factor 3C | 1.01309 |





[:0009753](#)

Biological Process

response to jasmonic acid stimulus

total number in query list: 28/899

total number in background/reference: 152/318

[GO Accession: GO:0](#)

Ontology: Biol

Description: re

Annotated/Tot

Annotated/Tot

| Description                                 | log2(fold_change) | ID        |
|---------------------------------------------|-------------------|-----------|
| TPS10 terpene synthase 10                   | 3.39559           | AT4G34780 |
| ATVSP2, ATVSP2 vegetative storage protei    | 3.15638           | AT4G34800 |
| ATVSP1, ATVSP1 vegetative storage protei    | 3.12987           | AT3G23250 |
| ATST2A, ST2A sulfotransferase 2A            | 2.55272           | AT5G07700 |
| mannose-binding lectin superfamily pr       | 2.04482           | AT2G45210 |
| ATY15, ATY19, ATMYB15 myb domain pr         | 1.96538           | AT5G59780 |
| ATY15, JR2 Tyrosine transaminase family p   | 1.86974           | AT1G74430 |
| ATMYC2, RD22BP1, JAI1, JIN1, MYC2, ZEP      | 1.83347           | AT5G67480 |
| FAD-binding Berberine family protein        | 1.71555           | AT5G67300 |
| ATMYB47, MYB47 myb domain protein           | 1.70289           | AT2G25930 |
| ATMYB75, PAP1, MYB75, SIAA1, ATMYB75        | 1.65771           | AT2G26740 |
| ATMYB76, TASTY, ESR epithiospecifier protei | 1.61193           | AT5G54490 |
| ATMYB76, AtMYB76 myb domain protein         | 1.57678           | AT1G54060 |
| ATDHAR1, DHAR5 dehydroascorbate r           | 1.5068            | AT4G13520 |
| ATLOX2, ATLOX2 lipoxygenase 2               | 1.46705           |           |
| ATMYB95, ATMYBCP66 myb domain               | 1.43569           |           |
| ATMYB29, PMG2 myb domain pr                 | 1.39232           |           |
| jasmonic acid carboxyl methyltransfe        | 1.28822           |           |
| TIFY11A jasmonate-zim-domain prot           | 1.27397           |           |
| PDF1, PDF1A, LCR77 plant defensin 1         | 1.26261           |           |
| ATMYB44, MYBR1, MYB44 myb c                 | 1.18991           |           |
| TIFY7 TIFY domain/Divergent CCT n           | 1.16581           |           |
| ANAC055, NAC055, NAC3 NAC dc                | 1.09833           |           |
| TIFY5B jasmonate-zim-domain prot            | 1.08527           |           |
| ATMYB48-3, MYB48 myb domain                 | 1.05358           |           |
| MDAR3, MDAR2 monodehydroas                  | 1.03407           |           |



\_\_\_\_\_

\_\_\_\_\_

\_\_\_\_\_

|

[1009733](#)

Biological Process

Response to auxin stimulus

Total number in query list: 14/899

Total number in background/reference: 29/31

[GO Accession: GO:00097](#)

Ontology: Biologic

Description: respo

Annotated/Total n

Annotated/Total n

| Description                                                                                                                                                                                                                                                                                                                                                                                                                                                                                                                                                                                                                                                                                                                                                                                                                                                                                                                                                                                                                                                                                                                                                                                                                                                                                                                                                                                                                                                                                                                                                                                                                                                                                                                                                                                                                                                                                                                                                                                                                                                                                                                                                                                                                                                                                                                                                                                                                                                                                                                                                                                                                                                                                                                                                                                                                                                                                                                                                                                                                                                                                                                                                                                                                                                                                                                                                                                                                                                                                                                                                                                                                                                                                                                                                                                                                                                                                                                                                                                                                                                                                                                                                                                                                                                                                                                                                                                                                                                                                                                                                                                                                                                                                                                                                                                                                                                                                                                                                                                                                                                                                                                                                                                                                                                                                                                                                                                                                                                                                                                                                                                                                                                                                                                                    | log2(fold_change) | ID        |
|------------------------------------------------------------------------------------------------------------------------------------------------------------------------------------------------------------------------------------------------------------------------------------------------------------------------------------------------------------------------------------------------------------------------------------------------------------------------------------------------------------------------------------------------------------------------------------------------------------------------------------------------------------------------------------------------------------------------------------------------------------------------------------------------------------------------------------------------------------------------------------------------------------------------------------------------------------------------------------------------------------------------------------------------------------------------------------------------------------------------------------------------------------------------------------------------------------------------------------------------------------------------------------------------------------------------------------------------------------------------------------------------------------------------------------------------------------------------------------------------------------------------------------------------------------------------------------------------------------------------------------------------------------------------------------------------------------------------------------------------------------------------------------------------------------------------------------------------------------------------------------------------------------------------------------------------------------------------------------------------------------------------------------------------------------------------------------------------------------------------------------------------------------------------------------------------------------------------------------------------------------------------------------------------------------------------------------------------------------------------------------------------------------------------------------------------------------------------------------------------------------------------------------------------------------------------------------------------------------------------------------------------------------------------------------------------------------------------------------------------------------------------------------------------------------------------------------------------------------------------------------------------------------------------------------------------------------------------------------------------------------------------------------------------------------------------------------------------------------------------------------------------------------------------------------------------------------------------------------------------------------------------------------------------------------------------------------------------------------------------------------------------------------------------------------------------------------------------------------------------------------------------------------------------------------------------------------------------------------------------------------------------------------------------------------------------------------------------------------------------------------------------------------------------------------------------------------------------------------------------------------------------------------------------------------------------------------------------------------------------------------------------------------------------------------------------------------------------------------------------------------------------------------------------------------------------------------------------------------------------------------------------------------------------------------------------------------------------------------------------------------------------------------------------------------------------------------------------------------------------------------------------------------------------------------------------------------------------------------------------------------------------------------------------------------------------------------------------------------------------------------------------------------------------------------------------------------------------------------------------------------------------------------------------------------------------------------------------------------------------------------------------------------------------------------------------------------------------------------------------------------------------------------------------------------------------------------------------------------------------------------------------------------------------------------------------------------------------------------------------------------------------------------------------------------------------------------------------------------------------------------------------------------------------------------------------------------------------------------------------------------------------------------------------------------------------------------------------------------------------|-------------------|-----------|
| UR-like auxin-responsive protein family 15, ATY19, ATMYB15 myb domain protein 1/B76, AtMYB76 myb domain protein                                                                                                                                                                                                                                                                                                                                                                                                                                                                                                                                                                                                                                                                                                                                                                                                                                                                                                                                                                                                                                                                                                                                                                                                                                                                                                                                                                                                                                                                                                                                                                                                                                                                                                                                                                                                                                                                                                                                                                                                                                                                                                                                                                                                                                                                                                                                                                                                                                                                                                                                                                                                                                                                                                                                                                                                                                                                                                                                                                                                                                                                                                                                                                                                                                                                                                                                                                                                                                                                                                                                                                                                                                                                                                                                                                                                                                                                                                                                                                                                                                                                                                                                                                                                                                                                                                                                                                                                                                                                                                                                                                                                                                                                                                                                                                                                                                                                                                                                                                                                                                                                                                                                                                                                                                                                                                                                                                                                                                                                                                                                                                                                                                | 4.43433           | AT3G59220 |
| UR-like auxin-responsive protein family 15, ATY19, ATMYB15 myb domain protein 1/B76, AtMYB76 myb domain protein                                                                                                                                                                                                                                                                                                                                                                                                                                                                                                                                                                                                                                                                                                                                                                                                                                                                                                                                                                                                                                                                                                                                                                                                                                                                                                                                                                                                                                                                                                                                                                                                                                                                                                                                                                                                                                                                                                                                                                                                                                                                                                                                                                                                                                                                                                                                                                                                                                                                                                                                                                                                                                                                                                                                                                                                                                                                                                                                                                                                                                                                                                                                                                                                                                                                                                                                                                                                                                                                                                                                                                                                                                                                                                                                                                                                                                                                                                                                                                                                                                                                                                                                                                                                                                                                                                                                                                                                                                                                                                                                                                                                                                                                                                                                                                                                                                                                                                                                                                                                                                                                                                                                                                                                                                                                                                                                                                                                                                                                                                                                                                                                                                | 3.63278           | AT5G59310 |
| UR-like auxin-responsive protein family 15, ATY19, ATMYB15 myb domain protein 1/B76, AtMYB76 myb domain protein                                                                                                                                                                                                                                                                                                                                                                                                                                                                                                                                                                                                                                                                                                                                                                                                                                                                                                                                                                                                                                                                                                                                                                                                                                                                                                                                                                                                                                                                                                                                                                                                                                                                                                                                                                                                                                                                                                                                                                                                                                                                                                                                                                                                                                                                                                                                                                                                                                                                                                                                                                                                                                                                                                                                                                                                                                                                                                                                                                                                                                                                                                                                                                                                                                                                                                                                                                                                                                                                                                                                                                                                                                                                                                                                                                                                                                                                                                                                                                                                                                                                                                                                                                                                                                                                                                                                                                                                                                                                                                                                                                                                                                                                                                                                                                                                                                                                                                                                                                                                                                                                                                                                                                                                                                                                                                                                                                                                                                                                                                                                                                                                                                | 1.96538           | AT3G20470 |
| UR-like auxin-responsive protein family 15, ATY19, ATMYB15 myb domain protein 1/B76, AtMYB76 myb domain protein                                                                                                                                                                                                                                                                                                                                                                                                                                                                                                                                                                                                                                                                                                                                                                                                                                                                                                                                                                                                                                                                                                                                                                                                                                                                                                                                                                                                                                                                                                                                                                                                                                                                                                                                                                                                                                                                                                                                                                                                                                                                                                                                                                                                                                                                                                                                                                                                                                                                                                                                                                                                                                                                                                                                                                                                                                                                                                                                                                                                                                                                                                                                                                                                                                                                                                                                                                                                                                                                                                                                                                                                                                                                                                                                                                                                                                                                                                                                                                                                                                                                                                                                                                                                                                                                                                                                                                                                                                                                                                                                                                                                                                                                                                                                                                                                                                                                                                                                                                                                                                                                                                                                                                                                                                                                                                                                                                                                                                                                                                                                                                                                                                | 1.57678           | AT5G15960 |
| UR-like auxin-responsive protein family 15, ATY19, ATMYB15 myb domain protein 1/B76, AtMYB76 myb domain protein                                                                                                                                                                                                                                                                                                                                                                                                                                                                                                                                                                                                                                                                                                                                                                                                                                                                                                                                                                                                                                                                                                                                                                                                                                                                                                                                                                                                                                                                                                                                                                                                                                                                                                                                                                                                                                                                                                                                                                                                                                                                                                                                                                                                                                                                                                                                                                                                                                                                                                                                                                                                                                                                                                                                                                                                                                                                                                                                                                                                                                                                                                                                                                                                                                                                                                                                                                                                                                                                                                                                                                                                                                                                                                                                                                                                                                                                                                                                                                                                                                                                                                                                                                                                                                                                                                                                                                                                                                                                                                                                                                                                                                                                                                                                                                                                                                                                                                                                                                                                                                                                                                                                                                                                                                                                                                                                                                                                                                                                                                                                                                                                                                | 1.55906           | AT4G23600 |
| ATMYB59, ATMYB59-1 myb domain protein                                                                                                                                                                                                                                                                                                                                                                                                                                                                                                                                                                                                                                                                                                                                                                                                                                                                                                                                                                                                                                                                                                                                                                                                                                                                                                                                                                                                                                                                                                                                                                                                                                                                                                                                                                                                                                                                                                                                                                                                                                                                                                                                                                                                                                                                                                                                                                                                                                                                                                                                                                                                                                                                                                                                                                                                                                                                                                                                                                                                                                                                                                                                                                                                                                                                                                                                                                                                                                                                                                                                                                                                                                                                                                                                                                                                                                                                                                                                                                                                                                                                                                                                                                                                                                                                                                                                                                                                                                                                                                                                                                                                                                                                                                                                                                                                                                                                                                                                                                                                                                                                                                                                                                                                                                                                                                                                                                                                                                                                                                                                                                                                                                                                                                          | 1.54878           | AT4G25000 |
| ATMYB95, ATMYBCP66 myb domain protein                                                                                                                                                                                                                                                                                                                                                                                                                                                                                                                                                                                                                                                                                                                                                                                                                                                                                                                                                                                                                                                                                                                                                                                                                                                                                                                                                                                                                                                                                                                                                                                                                                                                                                                                                                                                                                                                                                                                                                                                                                                                                                                                                                                                                                                                                                                                                                                                                                                                                                                                                                                                                                                                                                                                                                                                                                                                                                                                                                                                                                                                                                                                                                                                                                                                                                                                                                                                                                                                                                                                                                                                                                                                                                                                                                                                                                                                                                                                                                                                                                                                                                                                                                                                                                                                                                                                                                                                                                                                                                                                                                                                                                                                                                                                                                                                                                                                                                                                                                                                                                                                                                                                                                                                                                                                                                                                                                                                                                                                                                                                                                                                                                                                                                          | 1.43569           | AT1G32640 |
| BT4, ATBT4 BTB and TAZ domain protein                                                                                                                                                                                                                                                                                                                                                                                                                                                                                                                                                                                                                                                                                                                                                                                                                                                                                                                                                                                                                                                                                                                                                                                                                                                                                                                                                                                                                                                                                                                                                                                                                                                                                                                                                                                                                                                                                                                                                                                                                                                                                                                                                                                                                                                                                                                                                                                                                                                                                                                                                                                                                                                                                                                                                                                                                                                                                                                                                                                                                                                                                                                                                                                                                                                                                                                                                                                                                                                                                                                                                                                                                                                                                                                                                                                                                                                                                                                                                                                                                                                                                                                                                                                                                                                                                                                                                                                                                                                                                                                                                                                                                                                                                                                                                                                                                                                                                                                                                                                                                                                                                                                                                                                                                                                                                                                                                                                                                                                                                                                                                                                                                                                                                                          | 1.24913           | AT2G41070 |
| MYB44, ATMYB44, MYBR1, MYB44 myb domain protein                                                                                                                                                                                                                                                                                                                                                                                                                                                                                                                                                                                                                                                                                                                                                                                                                                                                                                                                                                                                                                                                                                                                                                                                                                                                                                                                                                                                                                                                                                                                                                                                                                                                                                                                                                                                                                                                                                                                                                                                                                                                                                                                                                                                                                                                                                                                                                                                                                                                                                                                                                                                                                                                                                                                                                                                                                                                                                                                                                                                                                                                                                                                                                                                                                                                                                                                                                                                                                                                                                                                                                                                                                                                                                                                                                                                                                                                                                                                                                                                                                                                                                                                                                                                                                                                                                                                                                                                                                                                                                                                                                                                                                                                                                                                                                                                                                                                                                                                                                                                                                                                                                                                                                                                                                                                                                                                                                                                                                                                                                                                                                                                                                                                                                | 1.18991           | AT2G38750 |
| Hydroxyproline-rich glycoprotein family 1, HPG1, HPG1L, HPG1S, HPG1T, HPG1U, HPG1V, HPG1W, HPG1X, HPG1Y, HPG1Z, HPG1AA, HPG1AB, HPG1AC, HPG1AD, HPG1AE, HPG1AF, HPG1AG, HPG1AH, HPG1AI, HPG1AJ, HPG1AK, HPG1AL, HPG1AM, HPG1AN, HPG1AO, HPG1AP, HPG1AQ, HPG1AR, HPG1AS, HPG1AT, HPG1AU, HPG1AV, HPG1AW, HPG1AX, HPG1AY, HPG1AZ, HPG1BA, HPG1BB, HPG1BC, HPG1BD, HPG1BE, HPG1BF, HPG1BG, HPG1BH, HPG1BI, HPG1BJ, HPG1BK, HPG1BL, HPG1BM, HPG1BN, HPG1BO, HPG1BP, HPG1BQ, HPG1BR, HPG1BS, HPG1BT, HPG1BU, HPG1BV, HPG1BW, HPG1BX, HPG1BY, HPG1BZ, HPG1CA, HPG1CB, HPG1CC, HPG1CD, HPG1CE, HPG1CF, HPG1CG, HPG1CH, HPG1CI, HPG1CJ, HPG1CK, HPG1CL, HPG1CM, HPG1CN, HPG1CO, HPG1CP, HPG1CQ, HPG1CR, HPG1CS, HPG1CT, HPG1CU, HPG1CV, HPG1CW, HPG1CX, HPG1CY, HPG1CZ, HPG1DA, HPG1DB, HPG1DC, HPG1DD, HPG1DE, HPG1DF, HPG1DG, HPG1DH, HPG1DI, HPG1DJ, HPG1DK, HPG1DL, HPG1DM, HPG1DN, HPG1DO, HPG1DP, HPG1DQ, HPG1DR, HPG1DS, HPG1DT, HPG1DU, HPG1DV, HPG1DW, HPG1DX, HPG1DY, HPG1DZ, HPG1EA, HPG1EB, HPG1EC, HPG1ED, HPG1EE, HPG1EF, HPG1EG, HPG1EH, HPG1EI, HPG1EJ, HPG1EK, HPG1EL, HPG1EM, HPG1EN, HPG1EO, HPG1EP, HPG1EQ, HPG1ER, HPG1ES, HPG1ET, HPG1EU, HPG1EV, HPG1EW, HPG1EX, HPG1EY, HPG1EZ, HPG1FA, HPG1FB, HPG1FC, HPG1FD, HPG1FE, HPG1FF, HPG1FG, HPG1FH, HPG1FI, HPG1FJ, HPG1FK, HPG1FL, HPG1FM, HPG1FN, HPG1FO, HPG1FP, HPG1FQ, HPG1FR, HPG1FS, HPG1FT, HPG1FU, HPG1FV, HPG1FW, HPG1FX, HPG1FY, HPG1FZ, HPG1GA, HPG1GB, HPG1GC, HPG1GD, HPG1GE, HPG1GF, HPG1GG, HPG1GH, HPG1GI, HPG1GJ, HPG1GK, HPG1GL, HPG1GM, HPG1GN, HPG1GO, HPG1GP, HPG1GQ, HPG1GR, HPG1GS, HPG1GT, HPG1GU, HPG1GV, HPG1GW, HPG1GX, HPG1GY, HPG1GZ, HPG1HA, HPG1HB, HPG1HC, HPG1HD, HPG1HE, HPG1HF, HPG1HG, HPG1HH, HPG1HI, HPG1HJ, HPG1HK, HPG1HL, HPG1HM, HPG1HN, HPG1HO, HPG1HP, HPG1HQ, HPG1HR, HPG1HS, HPG1HT, HPG1HU, HPG1HV, HPG1HW, HPG1HX, HPG1HY, HPG1HZ, HPG1IA, HPG1IB, HPG1IC, HPG1ID, HPG1IE, HPG1IF, HPG1IG, HPG1IH, HPG1II, HPG1IJ, HPG1IK, HPG1IL, HPG1IM, HPG1IN, HPG1IO, HPG1IP, HPG1IQ, HPG1IR, HPG1IS, HPG1IT, HPG1IU, HPG1IV, HPG1IW, HPG1IX, HPG1IY, HPG1IZ, HPG1JA, HPG1JB, HPG1JC, HPG1JD, HPG1JE, HPG1JF, HPG1JG, HPG1JH, HPG1JI, HPG1JJ, HPG1JK, HPG1JL, HPG1JM, HPG1JN, HPG1JO, HPG1JP, HPG1JQ, HPG1JR, HPG1JS, HPG1JT, HPG1JU, HPG1JV, HPG1JW, HPG1JX, HPG1JY, HPG1JZ, HPG1KA, HPG1KB, HPG1KC, HPG1KD, HPG1KE, HPG1KF, HPG1KG, HPG1KH, HPG1KI, HPG1KJ, HPG1KK, HPG1KL, HPG1KM, HPG1KN, HPG1KO, HPG1KP, HPG1KQ, HPG1KR, HPG1KS, HPG1KT, HPG1KU, HPG1KV, HPG1KW, HPG1KX, HPG1KY, HPG1KZ, HPG1LA, HPG1LB, HPG1LC, HPG1LD, HPG1LE, HPG1LF, HPG1LG, HPG1LH, HPG1LI, HPG1LJ, HPG1LK, HPG1LL, HPG1LM, HPG1LN, HPG1LO, HPG1LP, HPG1LQ, HPG1LR, HPG1LS, HPG1LT, HPG1LU, HPG1LV, HPG1LW, HPG1LX, HPG1LY, HPG1LZ, HPG1MA, HPG1MB, HPG1MC, HPG1MD, HPG1ME, HPG1MF, HPG1MG, HPG1MH, HPG1MI, HPG1MJ, HPG1MK, HPG1ML, HPG1MM, HPG1MN, HPG1MO, HPG1MP, HPG1MQ, HPG1MR, HPG1MS, HPG1MT, HPG1MU, HPG1MV, HPG1MW, HPG1MX, HPG1MY, HPG1MZ, HPG1NA, HPG1NB, HPG1NC, HPG1ND, HPG1NE, HPG1NF, HPG1NG, HPG1NH, HPG1NI, HPG1NJ, HPG1NK, HPG1NL, HPG1NM, HPG1NN, HPG1NO, HPG1NP, HPG1NQ, HPG1NR, HPG1NS, HPG1NT, HPG1NU, HPG1NV, HPG1NW, HPG1NX, HPG1NY, HPG1NZ, HPG1OA, HPG1OB, HPG1OC, HPG1OD, HPG1OE, HPG1OF, HPG1OG, HPG1OH, HPG1OI, HPG1OJ, HPG1OK, HPG1OL, HPG1OM, HPG1ON, HPG1OO, HPG1OP, HPG1OQ, HPG1OR, HPG1OS, HPG1OT, HPG1OU, HPG1OV, HPG1OW, HPG1OX, HPG1OY, HPG1OZ, HPG1PA, HPG1PB, HPG1PC, HPG1PD, HPG1PE, HPG1PF, HPG1PG, HPG1PH, HPG1PI, HPG1PJ, HPG1PK, HPG1PL, HPG1PM, HPG1PN, HPG1PO, HPG1PP, HPG1PQ, HPG1PR, HPG1PS, HPG1PT, HPG1PU, HPG1PV, HPG1PW, HPG1PX, HPG1PY, HPG1PZ, HPG1QA, HPG1QB, HPG1QC, HPG1QD, HPG1QE, HPG1QF, HPG1QG, HPG1QH, HPG1QI, HPG1QJ, HPG1QK, HPG1QL, HPG1QM, HPG1QN, HPG1QO, HPG1QP, HPG1QQ, HPG1QR, HPG1QS, HPG1QT, HPG1QU, HPG1QV, HPG1QW, HPG1QX, HPG1QY, HPG1QZ, HPG1RA, HPG1RB, HPG1RC, HPG1RD, HPG1RE, HPG1RF, HPG1RG, HPG1RH, HPG1RI, HPG1RJ, HPG1RK, HPG1RL, HPG1RM, HPG1RN, HPG1RO, HPG1RP, HPG1RQ, HPG1RR, HPG1RS, HPG1RT, HPG1RU, HPG1RV, HPG1RW, HPG1RX, HPG1RY, HPG1RZ, HPG1SA, HPG1SB, HPG1SC, HPG1SD, HPG1SE, HPG1SF, HPG1SG, HPG1SH, HPG1SI, HPG1SJ, HPG1SK, HPG1SL, HPG1SM, HPG1SN, HPG1SO, HPG1SP, HPG1SQ, HPG1SR, HPG1SS, HPG1ST, HPG1SU, HPG1SV, HPG1SW, HPG1SX, HPG1SY, HPG1SZ, HPG1TA, HPG1TB, HPG1TC, HPG1TD, HPG1TE, HPG1TF, HPG1TG, HPG1TH, HPG1TI, HPG1TJ, HPG1TK, HPG1TL, HPG1TM, HPG1TN, HPG1TO, HPG1TP, HPG1TQ, HPG1TR, HPG1TS, HPG1TT, HPG1TU, HPG1TV, HPG1TW, HPG1TX, HPG1TY, HPG1TZ, HPG1UA, HPG1UB, HPG1UC, HPG1UD, HPG1UE, HPG1UF, HPG1UG, HPG1UH, HPG1UI, HPG1UJ, HPG1UK, HPG1UL, HPG1UM, HPG1UN, HPG1UO, HPG1UP, HPG1UQ, HPG1UR, HPG1US, HPG1UT, HPG1UU, HPG1UV, HPG1UW, HPG1UX, HPG1UY, HPG1UZ, HPG1VA, HPG1VB, HPG1VC, HPG1VD, HPG1VE, HPG1VF, HPG1VG, HPG1VH, HPG1VI, HPG1VJ, HPG1VK, HPG1VL, HPG1VM, HPG1VN, HPG1VO, HPG1VP, HPG1VQ, HPG1VR, HPG1VS, HPG1VT, HPG1VU, HPG1VV, HPG1VW, HPG1VX, HPG1VY, HPG1VZ, HPG1WA, HPG1WB, HPG1WC, HPG1WD, HPG1WE, HPG1WF, HPG1WG, HPG1WH, HPG1WI, HPG1WJ, HPG1WK, HPG1WL, HPG1WM, HPG1WN, HPG1WO, HPG1WP, HPG1WQ, HPG1WR, HPG1WS, HPG1WT, HPG1WU, HPG1WV, HPG1WW, HPG1WX, HPG1WY, HPG1WZ, HPG1XA, HPG1XB, HPG1XC, HPG1XD, HPG1XE, HPG1XF, HPG1XG, HPG1XH, HPG1XI, HPG1XJ, HPG1XK, HPG1XL, HPG1XM, HPG1XN, HPG1XO, HPG1XP, HPG1XQ, HPG1XR, HPG1XS, HPG1XT, HPG1XU, HPG1XV, HPG1XW, HPG1XX, HPG1XY, HPG1XZ, HPG1YA, HPG1YB, HPG1YC, HPG1YD, HPG1YE, HPG1YF, HPG1YG, HPG1YH, HPG1YI, HPG1YJ, HPG1YK, HPG1YL, HPG1YM, HPG1YN, HPG1YO, HPG1YP, HPG1YQ, HPG1YR, HPG1YS, HPG1YT, HPG1YU, HPG1YV, HPG1YW, HPG1YX, HPG1YY, HPG1YZ, HPG1ZA, HPG1ZB, HPG1ZC, HPG1ZD, HPG1ZE, HPG1ZF, HPG1ZG, HPG1ZH, HPG1ZI, HPG1ZJ, HPG1ZK, HPG1ZL, HPG1ZM, HPG1ZN, HPG1ZO, HPG1ZP, HPG1ZQ, HPG1ZR, HPG1ZS, HPG1ZT, HPG1ZU, HPG1ZV, HPG1ZW, HPG1ZX, HPG1ZY, HPG1ZZ | 1.09545           | AT5G59320 |
| ASIL1 6B-interacting protein 1-like 1                                                                                                                                                                                                                                                                                                                                                                                                                                                                                                                                                                                                                                                                                                                                                                                                                                                                                                                                                                                                                                                                                                                                                                                                                                                                                                                                                                                                                                                                                                                                                                                                                                                                                                                                                                                                                                                                                                                                                                                                                                                                                                                                                                                                                                                                                                                                                                                                                                                                                                                                                                                                                                                                                                                                                                                                                                                                                                                                                                                                                                                                                                                                                                                                                                                                                                                                                                                                                                                                                                                                                                                                                                                                                                                                                                                                                                                                                                                                                                                                                                                                                                                                                                                                                                                                                                                                                                                                                                                                                                                                                                                                                                                                                                                                                                                                                                                                                                                                                                                                                                                                                                                                                                                                                                                                                                                                                                                                                                                                                                                                                                                                                                                                                                          | 1.08115           | AT1G69260 |
| SMAP1 small acidic protein 1                                                                                                                                                                                                                                                                                                                                                                                                                                                                                                                                                                                                                                                                                                                                                                                                                                                                                                                                                                                                                                                                                                                                                                                                                                                                                                                                                                                                                                                                                                                                                                                                                                                                                                                                                                                                                                                                                                                                                                                                                                                                                                                                                                                                                                                                                                                                                                                                                                                                                                                                                                                                                                                                                                                                                                                                                                                                                                                                                                                                                                                                                                                                                                                                                                                                                                                                                                                                                                                                                                                                                                                                                                                                                                                                                                                                                                                                                                                                                                                                                                                                                                                                                                                                                                                                                                                                                                                                                                                                                                                                                                                                                                                                                                                                                                                                                                                                                                                                                                                                                                                                                                                                                                                                                                                                                                                                                                                                                                                                                                                                                                                                                                                                                                                   | 1.00884           | AT5G15970 |
|                                                                                                                                                                                                                                                                                                                                                                                                                                                                                                                                                                                                                                                                                                                                                                                                                                                                                                                                                                                                                                                                                                                                                                                                                                                                                                                                                                                                                                                                                                                                                                                                                                                                                                                                                                                                                                                                                                                                                                                                                                                                                                                                                                                                                                                                                                                                                                                                                                                                                                                                                                                                                                                                                                                                                                                                                                                                                                                                                                                                                                                                                                                                                                                                                                                                                                                                                                                                                                                                                                                                                                                                                                                                                                                                                                                                                                                                                                                                                                                                                                                                                                                                                                                                                                                                                                                                                                                                                                                                                                                                                                                                                                                                                                                                                                                                                                                                                                                                                                                                                                                                                                                                                                                                                                                                                                                                                                                                                                                                                                                                                                                                                                                                                                                                                |                   | AT4G15910 |
|                                                                                                                                                                                                                                                                                                                                                                                                                                                                                                                                                                                                                                                                                                                                                                                                                                                                                                                                                                                                                                                                                                                                                                                                                                                                                                                                                                                                                                                                                                                                                                                                                                                                                                                                                                                                                                                                                                                                                                                                                                                                                                                                                                                                                                                                                                                                                                                                                                                                                                                                                                                                                                                                                                                                                                                                                                                                                                                                                                                                                                                                                                                                                                                                                                                                                                                                                                                                                                                                                                                                                                                                                                                                                                                                                                                                                                                                                                                                                                                                                                                                                                                                                                                                                                                                                                                                                                                                                                                                                                                                                                                                                                                                                                                                                                                                                                                                                                                                                                                                                                                                                                                                                                                                                                                                                                                                                                                                                                                                                                                                                                                                                                                                                                                                                |                   | AT2G33380 |
|                                                                                                                                                                                                                                                                                                                                                                                                                                                                                                                                                                                                                                                                                                                                                                                                                                                                                                                                                                                                                                                                                                                                                                                                                                                                                                                                                                                                                                                                                                                                                                                                                                                                                                                                                                                                                                                                                                                                                                                                                                                                                                                                                                                                                                                                                                                                                                                                                                                                                                                                                                                                                                                                                                                                                                                                                                                                                                                                                                                                                                                                                                                                                                                                                                                                                                                                                                                                                                                                                                                                                                                                                                                                                                                                                                                                                                                                                                                                                                                                                                                                                                                                                                                                                                                                                                                                                                                                                                                                                                                                                                                                                                                                                                                                                                                                                                                                                                                                                                                                                                                                                                                                                                                                                                                                                                                                                                                                                                                                                                                                                                                                                                                                                                                                                |                   | AT2G32690 |
|                                                                                                                                                                                                                                                                                                                                                                                                                                                                                                                                                                                                                                                                                                                                                                                                                                                                                                                                                                                                                                                                                                                                                                                                                                                                                                                                                                                                                                                                                                                                                                                                                                                                                                                                                                                                                                                                                                                                                                                                                                                                                                                                                                                                                                                                                                                                                                                                                                                                                                                                                                                                                                                                                                                                                                                                                                                                                                                                                                                                                                                                                                                                                                                                                                                                                                                                                                                                                                                                                                                                                                                                                                                                                                                                                                                                                                                                                                                                                                                                                                                                                                                                                                                                                                                                                                                                                                                                                                                                                                                                                                                                                                                                                                                                                                                                                                                                                                                                                                                                                                                                                                                                                                                                                                                                                                                                                                                                                                                                                                                                                                                                                                                                                                                                                |                   | AT2G05520 |
|                                                                                                                                                                                                                                                                                                                                                                                                                                                                                                                                                                                                                                                                                                                                                                                                                                                                                                                                                                                                                                                                                                                                                                                                                                                                                                                                                                                                                                                                                                                                                                                                                                                                                                                                                                                                                                                                                                                                                                                                                                                                                                                                                                                                                                                                                                                                                                                                                                                                                                                                                                                                                                                                                                                                                                                                                                                                                                                                                                                                                                                                                                                                                                                                                                                                                                                                                                                                                                                                                                                                                                                                                                                                                                                                                                                                                                                                                                                                                                                                                                                                                                                                                                                                                                                                                                                                                                                                                                                                                                                                                                                                                                                                                                                                                                                                                                                                                                                                                                                                                                                                                                                                                                                                                                                                                                                                                                                                                                                                                                                                                                                                                                                                                                                                                |                   | AT1G76180 |
|                                                                                                                                                                                                                                                                                                                                                                                                                                                                                                                                                                                                                                                                                                                                                                                                                                                                                                                                                                                                                                                                                                                                                                                                                                                                                                                                                                                                                                                                                                                                                                                                                                                                                                                                                                                                                                                                                                                                                                                                                                                                                                                                                                                                                                                                                                                                                                                                                                                                                                                                                                                                                                                                                                                                                                                                                                                                                                                                                                                                                                                                                                                                                                                                                                                                                                                                                                                                                                                                                                                                                                                                                                                                                                                                                                                                                                                                                                                                                                                                                                                                                                                                                                                                                                                                                                                                                                                                                                                                                                                                                                                                                                                                                                                                                                                                                                                                                                                                                                                                                                                                                                                                                                                                                                                                                                                                                                                                                                                                                                                                                                                                                                                                                                                                                |                   | AT5G66400 |
|                                                                                                                                                                                                                                                                                                                                                                                                                                                                                                                                                                                                                                                                                                                                                                                                                                                                                                                                                                                                                                                                                                                                                                                                                                                                                                                                                                                                                                                                                                                                                                                                                                                                                                                                                                                                                                                                                                                                                                                                                                                                                                                                                                                                                                                                                                                                                                                                                                                                                                                                                                                                                                                                                                                                                                                                                                                                                                                                                                                                                                                                                                                                                                                                                                                                                                                                                                                                                                                                                                                                                                                                                                                                                                                                                                                                                                                                                                                                                                                                                                                                                                                                                                                                                                                                                                                                                                                                                                                                                                                                                                                                                                                                                                                                                                                                                                                                                                                                                                                                                                                                                                                                                                                                                                                                                                                                                                                                                                                                                                                                                                                                                                                                                                                                                |                   | AT5G67300 |
|                                                                                                                                                                                                                                                                                                                                                                                                                                                                                                                                                                                                                                                                                                                                                                                                                                                                                                                                                                                                                                                                                                                                                                                                                                                                                                                                                                                                                                                                                                                                                                                                                                                                                                                                                                                                                                                                                                                                                                                                                                                                                                                                                                                                                                                                                                                                                                                                                                                                                                                                                                                                                                                                                                                                                                                                                                                                                                                                                                                                                                                                                                                                                                                                                                                                                                                                                                                                                                                                                                                                                                                                                                                                                                                                                                                                                                                                                                                                                                                                                                                                                                                                                                                                                                                                                                                                                                                                                                                                                                                                                                                                                                                                                                                                                                                                                                                                                                                                                                                                                                                                                                                                                                                                                                                                                                                                                                                                                                                                                                                                                                                                                                                                                                                                                |                   | AT5G52310 |
|                                                                                                                                                                                                                                                                                                                                                                                                                                                                                                                                                                                                                                                                                                                                                                                                                                                                                                                                                                                                                                                                                                                                                                                                                                                                                                                                                                                                                                                                                                                                                                                                                                                                                                                                                                                                                                                                                                                                                                                                                                                                                                                                                                                                                                                                                                                                                                                                                                                                                                                                                                                                                                                                                                                                                                                                                                                                                                                                                                                                                                                                                                                                                                                                                                                                                                                                                                                                                                                                                                                                                                                                                                                                                                                                                                                                                                                                                                                                                                                                                                                                                                                                                                                                                                                                                                                                                                                                                                                                                                                                                                                                                                                                                                                                                                                                                                                                                                                                                                                                                                                                                                                                                                                                                                                                                                                                                                                                                                                                                                                                                                                                                                                                                                                                                |                   | AT2G47190 |
|                                                                                                                                                                                                                                                                                                                                                                                                                                                                                                                                                                                                                                                                                                                                                                                                                                                                                                                                                                                                                                                                                                                                                                                                                                                                                                                                                                                                                                                                                                                                                                                                                                                                                                                                                                                                                                                                                                                                                                                                                                                                                                                                                                                                                                                                                                                                                                                                                                                                                                                                                                                                                                                                                                                                                                                                                                                                                                                                                                                                                                                                                                                                                                                                                                                                                                                                                                                                                                                                                                                                                                                                                                                                                                                                                                                                                                                                                                                                                                                                                                                                                                                                                                                                                                                                                                                                                                                                                                                                                                                                                                                                                                                                                                                                                                                                                                                                                                                                                                                                                                                                                                                                                                                                                                                                                                                                                                                                                                                                                                                                                                                                                                                                                                                                                |                   | AT2G25930 |
|                                                                                                                                                                                                                                                                                                                                                                                                                                                                                                                                                                                                                                                                                                                                                                                                                                                                                                                                                                                                                                                                                                                                                                                                                                                                                                                                                                                                                                                                                                                                                                                                                                                                                                                                                                                                                                                                                                                                                                                                                                                                                                                                                                                                                                                                                                                                                                                                                                                                                                                                                                                                                                                                                                                                                                                                                                                                                                                                                                                                                                                                                                                                                                                                                                                                                                                                                                                                                                                                                                                                                                                                                                                                                                                                                                                                                                                                                                                                                                                                                                                                                                                                                                                                                                                                                                                                                                                                                                                                                                                                                                                                                                                                                                                                                                                                                                                                                                                                                                                                                                                                                                                                                                                                                                                                                                                                                                                                                                                                                                                                                                                                                                                                                                                                                |                   | AT2G39800 |
|                                                                                                                                                                                                                                                                                                                                                                                                                                                                                                                                                                                                                                                                                                                                                                                                                                                                                                                                                                                                                                                                                                                                                                                                                                                                                                                                                                                                                                                                                                                                                                                                                                                                                                                                                                                                                                                                                                                                                                                                                                                                                                                                                                                                                                                                                                                                                                                                                                                                                                                                                                                                                                                                                                                                                                                                                                                                                                                                                                                                                                                                                                                                                                                                                                                                                                                                                                                                                                                                                                                                                                                                                                                                                                                                                                                                                                                                                                                                                                                                                                                                                                                                                                                                                                                                                                                                                                                                                                                                                                                                                                                                                                                                                                                                                                                                                                                                                                                                                                                                                                                                                                                                                                                                                                                                                                                                                                                                                                                                                                                                                                                                                                                                                                                                                |                   | AT1G01720 |
|                                                                                                                                                                                                                                                                                                                                                                                                                                                                                                                                                                                                                                                                                                                                                                                                                                                                                                                                                                                                                                                                                                                                                                                                                                                                                                                                                                                                                                                                                                                                                                                                                                                                                                                                                                                                                                                                                                                                                                                                                                                                                                                                                                                                                                                                                                                                                                                                                                                                                                                                                                                                                                                                                                                                                                                                                                                                                                                                                                                                                                                                                                                                                                                                                                                                                                                                                                                                                                                                                                                                                                                                                                                                                                                                                                                                                                                                                                                                                                                                                                                                                                                                                                                                                                                                                                                                                                                                                                                                                                                                                                                                                                                                                                                                                                                                                                                                                                                                                                                                                                                                                                                                                                                                                                                                                                                                                                                                                                                                                                                                                                                                                                                                                                                                                |                   | AT1G29395 |
|                                                                                                                                                                                                                                                                                                                                                                                                                                                                                                                                                                                                                                                                                                                                                                                                                                                                                                                                                                                                                                                                                                                                                                                                                                                                                                                                                                                                                                                                                                                                                                                                                                                                                                                                                                                                                                                                                                                                                                                                                                                                                                                                                                                                                                                                                                                                                                                                                                                                                                                                                                                                                                                                                                                                                                                                                                                                                                                                                                                                                                                                                                                                                                                                                                                                                                                                                                                                                                                                                                                                                                                                                                                                                                                                                                                                                                                                                                                                                                                                                                                                                                                                                                                                                                                                                                                                                                                                                                                                                                                                                                                                                                                                                                                                                                                                                                                                                                                                                                                                                                                                                                                                                                                                                                                                                                                                                                                                                                                                                                                                                                                                                                                                                                                                                |                   | AT3G46130 |
|                                                                                                                                                                                                                                                                                                                                                                                                                                                                                                                                                                                                                                                                                                                                                                                                                                                                                                                                                                                                                                                                                                                                                                                                                                                                                                                                                                                                                                                                                                                                                                                                                                                                                                                                                                                                                                                                                                                                                                                                                                                                                                                                                                                                                                                                                                                                                                                                                                                                                                                                                                                                                                                                                                                                                                                                                                                                                                                                                                                                                                                                                                                                                                                                                                                                                                                                                                                                                                                                                                                                                                                                                                                                                                                                                                                                                                                                                                                                                                                                                                                                                                                                                                                                                                                                                                                                                                                                                                                                                                                                                                                                                                                                                                                                                                                                                                                                                                                                                                                                                                                                                                                                                                                                                                                                                                                                                                                                                                                                                                                                                                                                                                                                                                                                                |                   | AT2G23430 |
|                                                                                                                                                                                                                                                                                                                                                                                                                                                                                                                                                                                                                                                                                                                                                                                                                                                                                                                                                                                                                                                                                                                                                                                                                                                                                                                                                                                                                                                                                                                                                                                                                                                                                                                                                                                                                                                                                                                                                                                                                                                                                                                                                                                                                                                                                                                                                                                                                                                                                                                                                                                                                                                                                                                                                                                                                                                                                                                                                                                                                                                                                                                                                                                                                                                                                                                                                                                                                                                                                                                                                                                                                                                                                                                                                                                                                                                                                                                                                                                                                                                                                                                                                                                                                                                                                                                                                                                                                                                                                                                                                                                                                                                                                                                                                                                                                                                                                                                                                                                                                                                                                                                                                                                                                                                                                                                                                                                                                                                                                                                                                                                                                                                                                                                                                |                   | AT2G46270 |
|                                                                                                                                                                                                                                                                                                                                                                                                                                                                                                                                                                                                                                                                                                                                                                                                                                                                                                                                                                                                                                                                                                                                                                                                                                                                                                                                                                                                                                                                                                                                                                                                                                                                                                                                                                                                                                                                                                                                                                                                                                                                                                                                                                                                                                                                                                                                                                                                                                                                                                                                                                                                                                                                                                                                                                                                                                                                                                                                                                                                                                                                                                                                                                                                                                                                                                                                                                                                                                                                                                                                                                                                                                                                                                                                                                                                                                                                                                                                                                                                                                                                                                                                                                                                                                                                                                                                                                                                                                                                                                                                                                                                                                                                                                                                                                                                                                                                                                                                                                                                                                                                                                                                                                                                                                                                                                                                                                                                                                                                                                                                                                                                                                                                                                                                                |                   | AT3G50970 |
|                                                                                                                                                                                                                                                                                                                                                                                                                                                                                                                                                                                                                                                                                                                                                                                                                                                                                                                                                                                                                                                                                                                                                                                                                                                                                                                                                                                                                                                                                                                                                                                                                                                                                                                                                                                                                                                                                                                                                                                                                                                                                                                                                                                                                                                                                                                                                                                                                                                                                                                                                                                                                                                                                                                                                                                                                                                                                                                                                                                                                                                                                                                                                                                                                                                                                                                                                                                                                                                                                                                                                                                                                                                                                                                                                                                                                                                                                                                                                                                                                                                                                                                                                                                                                                                                                                                                                                                                                                                                                                                                                                                                                                                                                                                                                                                                                                                                                                                                                                                                                                                                                                                                                                                                                                                                                                                                                                                                                                                                                                                                                                                                                                                                                                                                                |                   | AT4G34000 |

\_\_\_\_\_

\_\_\_\_\_

\_\_\_\_\_





37

al Process

se to abscisic acid stimulus

number in query list: 32/899

number in background/reference

[GO Accession: GO:0](#)

Ontology: Biol

Description: re

Annotated/Tot

Annotated/Tot

| Description                | log2(fold_change) | ID        |
|----------------------------|-------------------|-----------|
| RN, PRN1, ATPIRIN1 piri    | 2.70247           | AT5G59310 |
| P4 lipid transfer protein  | 2.21629           | AT1G52890 |
| -5, GRP5, ATGRP5 glycir    | 2.11075           | AT5G15960 |
| ponsive protein (KIN1) /   | 1.98703           | AT1G32640 |
| tyrosine transaminase fa   | 1.86974           | AT5G59220 |
| Y1, AMY1 alpha-amylas      | 1.84087           | AT5G59320 |
| RD22BP1, JAI1, JIN1, M'    | 1.83347           | AT5G15970 |
| L2, DPBF4 Basic-leucine    | 1.76315           | AT4G15910 |
| ANNAT4 annexin 4           | 1.75456           | AT3G45140 |
| ighly ABA-induced PP2C     | 1.68068           | AT3G05640 |
| ulose-bisphosphate cark    | 1.65291           | AT2G33380 |
| P3 lipid transfer protein  | 1.56413           | AT2G05520 |
| P1 ABI five binding prot   | 1.55131           | AT1G76180 |
| 5 stress-responsive prote  | 1.54072           | AT5G66400 |
| 21, DI21 drought-induce    | 1.51773           | AT5G67300 |
| -3 Caleosin-related fam    | 1.43225           | AT5G52310 |
| 3, GRP23 glycine-rich pr   | 1.38519           | AT2G47190 |
| -3, GRP3, ATGRP3 glycir    | 1.38181           | AT2G39800 |
| 14 Dehydrin family pro     | 1.28492           | AT2G26740 |
| ATDI8 Dehydrin family      | 1.24725           | AT3G15500 |
| MYB44, MYBR1, MYB44        | 1.18991           | AT1G29395 |
| 9A, LTI140 low-temperat    | 1.16667           | AT2G18050 |
| 2, MYB2 myb domain pr      | 1.15482           | AT3G09940 |
| oxyproline-rich glycopro   | 1.15464           | AT3G50970 |
| elta1-pyrroline-5-carbo    | 1.13015           | AT4G34000 |
| JAC002 NAC (No Apical I    | 1.09387           |           |
| 13IM1, COR413-TM1 CC       | 1.08713           |           |
| MYB48-3, MYB48 myb d       | 1.05358           |           |
| clin-dependent kinase ir   | 1.05064           |           |
| 3F3 G-box binding factor   | 1.03183           |           |
| XERO2 dehydrin family p    | 1.02636           |           |
| iscisic acid responsive el | 1.02184           |           |

\_\_\_\_\_

\_\_\_\_\_

\_\_\_\_\_

|

[1009414](#)

Biological Process

Response to water deprivation

Total number in query list: 25/899

Total number in background/reference: 32/31819

[GO Accession: GO:000](#)

Ontology: Biological

Description: response

Annotated/Total

Annotated/Total

| Description                                                    | log2(fold_change) | ID        |
|----------------------------------------------------------------|-------------------|-----------|
| LTP4 lipid transfer protein 4                                  | 2.21629           | AT2G42540 |
| ANAC019, NAC019 NAC domain containing protein                  | 2.20315           | AT3G16470 |
| KIN1 stress-responsive protein (KIN1) / stress-inducible       | 1.98703           | AT5G15960 |
| ATMYC2, RD22BP1, JAI1, JIN1, MYC2, ZBF1                        | 1.83347           | AT2G21660 |
| HAI1 highly ABA-induced PP2C gene 1                            | 1.68068           | AT3G26420 |
| LTP3 lipid transfer protein 3                                  | 1.56413           | AT5G15970 |
| KIN2, COR6 stress-responsive protein (KIN2) / stress-inducible | 1.54072           | AT1G50460 |
| ATDI21, DI21 drought-induced 21                                | 1.51773           | AT2G42530 |
| LOX2, ATLOX2 lipoxygenase 2                                    | 1.46705           | AT2G33380 |
| Protein phosphatase 2C family protein                          | 1.43642           | AT1G76180 |
| RD20, CLO-3 Caleosin-related family protein                    | 1.43225           | AT5G65050 |
| GRP-3, ATGRP-3, GRP3, ATGRP3 glycine-rich protein              | 1.38181           | AT5G66400 |
| ERD14 Dehydrin family protein                                  | 1.28492           | AT2G27720 |
| RAB18, ATDI8 Dehydrin family protein                           | 1.24725           | AT5G52310 |
| ATMYBR1, ATMYB44, MYBR1, MYB44 myb domain protein              | 1.18991           | AT3G61190 |
| COR78, LTI78, RD29A, LTI140 low-temperature responsive         | 1.16667           | AT2G25930 |
| ATMYB2, MYB2 myb domain protein 2                              | 1.15482           | AT1G29395 |
| P5CS1, ATP5CS delta1-pyrroline-5-carboxylate synthetase        | 1.13015           | AT5G43170 |
| ATSEH, SEH soluble epoxide hydrolase                           | 1.10371           | AT3G16460 |
| ATNAC3, ANAC055, NAC055, NAC3 NAC domain containing protein    | 1.09833           | AT4G38680 |
| COR414-TM1, COR413IM1, COR413-TM1 COLT1                        | 1.08713           | AT4G13850 |
| HIS1-3 histone H1-3                                            | 1.06144           | AT3G50970 |
| MDHAR, ATMDAR3, MDAR3, MDAR2 monodehydroascorbate reductase    | 1.03407           | AT5G58070 |
| LTI30, XERO2 dehydrin family protein                           | 1.02636           |           |
| ABF3, DPBF5 abscisic acid responsive element                   | 1.02184           |           |

\_\_\_\_\_



\_\_\_\_\_

\_\_\_\_\_

|

[19409](#)

**Biological Process**

**Response to cold**

**Number in query list: 23/899**

**Number in background/reference: 28/31819**

| Description                                        | log2(fold_change) |
|----------------------------------------------------|-------------------|
| COR15A, COR15 cold-regulated 15a                   | 2.12301           |
| JR1 Mannose-binding lectin superfamily protein     | 2.04482           |
| V1 stress-responsive protein (KIN1) / stress-induc | 1.98703           |
| ATGRP7, CCR2, GR-RBP7, GRP7 cold, circadian        | 1.76051           |
| 1A RNA-binding (RRM/RBD/RNP motifs) family pr      | 1.62974           |
| KIN2, COR6 stress-responsive protein (KIN2) /      | 1.54072           |
| HKL1, ATHKL1 hexokinase-like 1                     | 1.47731           |
| COR15B cold regulated 15b                          | 1.43547           |
| RD20, CLO-3 Caleosin-related family protein        | 1.43225           |
| ERD14 Dehydrin family protein                      | 1.28492           |
| AGL31, MAF2 AGAMOUS-like 31                        | 1.28147           |
| RAB18, ATDI8 Dehydrin family protein               | 1.24725           |
| 60S acidic ribosomal protein family                | 1.22207           |
| , LTI78, RD29A, LTI140 low-temperature-responsi    | 1.16667           |
| BAP1 BON association protein 1                     | 1.16651           |
| , PYK20 hydroxyproline-rich glycoprotein family p  | 1.15464           |
| 4-TM1, COR413IM1, COR413-TM1 COLD REGULAT          | 1.08713           |
| AZF3, ZF3 zinc-finger protein 3                    | 1.08569           |
| Mannose-binding lectin superfamily protein         | 1.07626           |
| GRP2, CSDP2, CSP2, ATCSP2 glycine rich             | 1.06675           |
| RP2, GR-RBP2, GRP2 glycine-rich RNA-binding prc    | 1.0276            |
| LTI30, XERO2 dehydrin family protein               | 1.02636           |
| ATTIL, TIL temperature-induced lipocalin           | 1.01675           |

\_\_\_\_\_

\_\_\_\_\_

\_\_\_\_\_





[GO Accession: GO:0009266](#)

**Ontology: Biological Process**

**Description: response to temperature stimulus**

**Annotated/Total number in query list: 28/899**

**Annotated/Total number in background/reference: 51/318**

| <b>ID</b> | <b>Description</b>                                       |
|-----------|----------------------------------------------------------|
| AT2G42540 | COR15A, COR15 cold-regulated 15a                         |
| AT3G16470 | JR1 Mannose-binding lectin superfamily protein           |
| AT1G07400 | HSP20-like chaperones superfamily protein                |
| AT5G15960 | KIN1 stress-responsive protein (KIN1) / stress-inducible |
| AT1G54050 | HSP20-like chaperones superfamily protein                |
| AT2G21660 | ATGRP7, CCR2, GR-RBP7, GRP7 cold, circadian              |
| AT2G47180 | AtGolS1, GolS1 galactinol synthase 1                     |
| AT3G26420 | ERF1 RNA-binding (RRM/RBD/RNP motifs) family protein     |
| AT5G15970 | KIN2, COR6 stress-responsive protein (KIN2) /            |
| AT1G50460 | HKL1, ATHKL1 hexokinase-like 1                           |
| AT2G42530 | COR15B cold regulated 15b                                |
| AT2G33380 | RD20, CLO-3 Caleosin-related family protein              |
| AT1G76180 | ERD14 Dehydrin family protein                            |
| AT5G65050 | AGL31, MAF2 AGAMOUS-like 31                              |
| AT5G66400 | RAB18, ATDI8 Dehydrin family protein                     |
| AT2G27720 | 60S acidic ribosomal protein family                      |
| AT5G52310 | 8, LTI78, RD29A, LTI140 low-temperature-responsive       |
| AT3G61190 | BAP1 BON association protein 1                           |
| AT2G25930 | 3, PYK20 hydroxyproline-rich glycoprotein family protein |
| AT1G77000 | ATSKP2;2, SKP2B RNI-like superfamily protein             |
| AT1G29395 | 4-TM1, COR413IM1, COR413-TM1 COLD REGULATED              |
| AT5G43170 | AZF3, ZF3 zinc-finger protein 3                          |
| AT3G16460 | Mannose-binding lectin superfamily protein               |
| AT4G38680 | GRP2, CSDP2, CSP2, ATCSP2 glycine rich                   |
| AT5G61900 | CPN1, BON Calcium-dependent phospholipid-binding         |
| AT4G13850 | 5RP2, GR-RBP2, GRP2 glycine-rich RNA-binding protein     |
| AT3G50970 | LTI30, XERO2 dehydrin family protein                     |
| AT5G58070 | ATTIL, TIL temperature-induced lipocalin                 |









[GO Accession: GO:0009651](#)  
Ontology: Biological I  
Description: response  
Annotated/Total num  
Annotated/Total num

319

| log2(fold_change) | ID        |
|-------------------|-----------|
| 2.12301           | AT5G24770 |
| 2.04482           | AT3G23250 |
| 1.99185           | AT4G23600 |
| 1.98703           | AT1G18710 |
| 1.90882           | AT1G56650 |
| 1.76051           | AT5G59780 |
| 1.69777           | AT1G50460 |
| 1.62974           | AT2G33380 |
| 1.54072           | AT5G67300 |
| 1.47731           | AT5G52310 |
| 1.43547           | AT2G47190 |
| 1.43225           | AT2G39800 |
| 1.28492           | AT5G43170 |
| 1.28147           | AT2G23290 |
| 1.24725           | AT3G46130 |
| 1.22207           | AT4G34000 |
| 1.16667           |           |
| 1.16651           |           |
| 1.15464           |           |
| 1.13058           |           |
| 1.08713           |           |
| 1.08569           |           |
| 1.07626           |           |
| 1.06675           |           |
| 1.0296            |           |
| 1.0276            |           |
| 1.02636           |           |
| 1.01675           |           |

\_\_\_\_\_

\_\_\_\_\_



\_\_\_\_\_

|

Process

Response to salt stress

Number in query list: 16/899

Number in background/reference: 70/31819

| Description                                           | log2(fold_change) |
|-------------------------------------------------------|-------------------|
| VSP2, ATVSP2 vegetative storage protein 2             | 3.15638           |
| MYB15, ATY19, ATMYB15 myb domain protein              | 1.96538           |
| COR13, JR2 Tyrosine transaminase family protein       | 1.86974           |
| AtMYB47, MYB47 myb domain protein 47                  | 1.70289           |
| PAP1, MYB75, SIAA1, ATMYB75                           | 1.65771           |
| MYB59, ATMYB59, ATMYB59-1 myb domain protein          | 1.54878           |
| HKL1, ATHKL1 hexokinase-like 1                        | 1.47731           |
| RD20, CLO-3 Caleosin-related family protein           | 1.43225           |
| ATMYBR1, ATMYB44, MYBR1, MYB44 myb domain             | 1.18991           |
| 78, LTI78, RD29A, LTI140 low-temperature-responsive   | 1.16667           |
| ATMYB2, MYB2 myb domain protein 2                     | 1.15482           |
| 5CS1, ATP5CS delta1-pyrroline-5-carboxylate synthase  | 1.13015           |
| AZF3, ZF3 zinc-finger protein 3                       | 1.08569           |
| AtMYB70, MYB70 myb domain protein 70                  | 1.08316           |
| ATMYB48, ATMYB48-3, MYB48 myb domain protein          | 1.05358           |
| ABF3, DPBF5 abscisic acid responsive elements-binding | 1.02184           |

\_\_\_\_\_

\_\_\_\_\_

\_\_\_\_\_



[GO Accession: GO:0006970](#)

**Ontology: Biological Process**

**Description: response to osmotic stress**

**Annotated/Total number in query list: 22/899**

**Annotated/Total number in background/reference: 8/1000**

| <b>ID</b> | <b>Description</b>                                      |
|-----------|---------------------------------------------------------|
| AT5G24770 | VSP2, ATVSP2 vegetative storage protein 2               |
| AT2G42540 | COR15A, COR15 cold-regulated 15a                        |
| AT5G15960 | N1 stress-responsive protein (KIN1) / stress-inducible  |
| AT3G23250 | MYB15, ATY19, ATMYB15 myb domain protein                |
| AT4G23600 | COR13, JR2 Tyrosine transaminase family protein         |
| AT2G21660 | ATGRP7, CCR2, GR-RBP7, GRP7 cold, circadian             |
| AT2G38750 | ANNAT4 annexin 4                                        |
| AT1G18710 | AtMYB47, MYB47 myb domain protein 47                    |
| AT1G56650 | PAP1, MYB75, SIAA1, ATMYB75                             |
| AT5G59780 | MYB59, ATMYB59, ATMYB59-1 myb domain protein            |
| AT5G15970 | KIN2, COR6 stress-responsive protein (KIN2) /           |
| AT1G50460 | HKL1, ATHKL1 hexokinase-like 1                          |
| AT2G33380 | RD20, CLO-3 Caleosin-related family protein             |
| AT5G67300 | ATMYBR1, ATMYB44, MYBR1, MYB44 myb domain               |
| AT5G52310 | 3, LTI78, RD29A, LTI140 low-temperature-responsive      |
| AT2G47190 | ATMYB2, MYB2 myb domain protein 2                       |
| AT2G39800 | ATP5CS1, ATP5CS delta1-pyrroline-5-carboxylate synthase |
| AT5G43170 | AZF3, ZF3 zinc-finger protein 3                         |
| AT2G23290 | AtMYB70, MYB70 myb domain protein 70                    |
| AT3G46130 | ATMYB48, ATMYB48-3, MYB48 myb domain protein            |
| AT4G13850 | GRP2, GR-RBP2, GRP2 glycine-rich RNA-binding protein    |
| AT4G34000 | DPBF5, DPBF5 abscisic acid responsive elements-binding  |











[GO Accession: GO:005170](#)

Ontology: Biological

Description: response to

Annotation: 31/31819

31/31819

| log2(fold_change) | ID        |
|-------------------|-----------|
| 3.15638           | AT4G37990 |
| 2.12301           | AT3G44300 |
| 1.98703           | AT5G24770 |
| 1.96538           | AT3G11480 |
| 1.86974           | AT2G43510 |
| 1.76051           | AT4G37150 |
| 1.75456           | AT3G09260 |
| 1.70289           | AT2G06050 |
| 1.65771           | AT2G23620 |
| 1.54878           | AT1G54040 |
| 1.54072           | AT3G16400 |
| 1.47731           | AT1G19570 |
| 1.43225           | AT3G45140 |
| 1.18991           | AT4G15210 |
| 1.16667           | AT2G33380 |
| 1.15482           | AT4G12480 |
| 1.13015           | AT5G44420 |
| 1.08569           | AT2G22330 |
| 1.08316           | AT2G23560 |
| 1.05358           | AT4G37000 |
| 1.0276            | AT4G39030 |
| 1.02184           | AT3G09940 |
|                   | AT5G17520 |

\_\_\_\_\_

\_\_\_\_\_

\_\_\_\_\_



|

## 7

### il Process

ise to other organism

umber in query list: 26/899

umber in background/reference: 96/31819

| Description                                         | log2(fold_change) |
|-----------------------------------------------------|-------------------|
| I3-2, ELI3, ATCAD8, CAD-B2 elicitor-activated ge    | 3.85242           |
| NIT2, AtNIT2 nitrilase 2                            | 3.45531           |
| VSP2, ATVSP2 vegetative storage protein 2           | 3.15638           |
| unknown protein; Has 23 Blast hits                  | 2.33413           |
| ATTI1, TI1 trypsin inhibitor protein 1              | 2.27947           |
| ATMES9, MES9 methyl esterase 9                      | 2.04376           |
| PYK10, PSR3, BGLU23, LEB Glycosyl hydrolase         | 1.7732            |
| OPR3 oxophytodienoate-reductase 3                   | 1.76284           |
| ATMES1, MES1 methyl esterase 1                      | 1.61372           |
| ESP, TASTY, ESR epithiospecifier protein            | 1.61193           |
| TMLP-470, NSP1, ATNSP1 nitrile specifier protei     | 1.58486           |
| AR1, ATDHAR1, DHAR5 dehydroascorbate reduct         | 1.5068            |
| LOX2, ATLOX2 lipoxygenase 2                         | 1.46705           |
| -AMY, AT-BETA-AMY, RAM1, BMY1, BAM5 beta-           | 1.45266           |
| RD20, CLO-3 Caleosin-related family protein         | 1.43225           |
| RLI 1 Bifunctional inhibitor/lipid-transfer protein | 1.42336           |
| PDF1, PDF1A, LCR77 plant defensin 1                 | 1.26261           |
| CYP79B3 Cytochrome P450                             | 1.18528           |
| ATMES7, MES7 methyl esterase 7                      | 1.14371           |
| ACD2, ATRCCR accelerated cell death 2               | 1.12311           |
| EDS5, SID1 MATE efflux family protein               | 1.09045           |
| MDAR3, MDAR3, MDAR2 monodehydroascorba              | 1.03407           |
| RCP1, MEX1 root cap 1 (RCP1)                        | 1.01155           |
