# Supplementary material for: Mechanisms underlying the enhanced biomass and abiotic stress tolerance phenotype of an Arabidopsis MIOX over‐expresser
Source: PubMed Central journal article supplement — Plant Direct. 2019 Sep 2;3(9):e00165. doi: 10.1002/pld3.165 (PMC6718051; doi:10.1002/pld3.165), 2019-09-02
Supplement: PLD3-3-e00165-s006.pdf [file PLD3-3-e00165-s006.pdf]

[GO Accession: GO:0050896](#)

**Ontology:** Biological Process

**Description:** response to stimulus

**Annotated/Total number in query list:** 45/322

**Annotated/Total number in background/reference:** 985/31819

| ID        | Description                            | log2(fold_change) |
|-----------|----------------------------------------|-------------------|
| AT5G59845 | Gibberellin-regulated family protein   | -3.2326           |
| AT3G59900 | ARGOS auxin-regulated gene involved    | -3.22481          |
| AT2G14610 | PR1, PR 1, ATPR1 pathogenesis-relate   | -2.40485          |
| AT3G16670 | Pollen Ole e 1 allergen and            | -2.38297          |
| AT4G16260 | Glycosyl hydrolase superfamily protei  | -2.36978          |
| AT5G51890 | Peroxidase superfamily protein         | -2.0227           |
| AT5G20630 | GLP3, GLP3A, GLP3B, ATGER3, GER3 g     | -1.87719          |
| AT1G19840 | SAUR-like auxin-responsive protein fa  | -1.84963          |
| AT5G23400 | Leucine-rich repeat (LRR) family prote | -1.74694          |
| AT4G08950 | EXO Phosphate-responsive 1 family pi   | -1.74198          |
| AT1G65870 | Disease resistance-responsive (diriger | -1.73882          |
| AT4G36410 | UBC17 ubiquitin-conjugating enzyme     | -1.6778           |
| AT1G77700 | Pathogenesis-related thaumatin supe    | -1.66602          |
| AT4G24180 | TLP1, ATTLP1 THAUMATIN-LIKE PROTI      | -1.64285          |
| AT5G15180 | Peroxidase superfamily protein         | -1.5499           |
| AT4G23550 | WRKY29, ATWRKY29 WRKY family tra       | -1.48748          |
| AT3G18485 | ILR2 iaa-leucine resistant 2           | -1.42713          |
| AT2G46970 | PIL1 phyto                             | -1.37855          |
| AT2G29130 | LAC2, ATLAC2 laccase 2                 | -1.37506          |
| AT1G14540 | Peroxidase superfamily protein         | -1.35362          |
| AT4G09950 | P-loop containing nucleoside triphosp  | -1.35058          |
| AT5G67450 | AZF1, ZF1 zinc-finger protein 1        | -1.32776          |
| AT5G40020 | Pathogenesis-related thaumatin supe    | -1.28473          |
| AT2G33710 | Integrase-type DNA-binding superfam    | -1.28413          |
| AT4G18780 | CESA8, IRX1, ATCESA8, LEW2 cellulose   | -1.28274          |
| AT2G04070 | MATE efflux family protein             | -1.23187          |
| AT1G73620 | Pathogenesis-related thaumatin supe    | -1.21617          |
| AT1G59740 | Major facilitator superfamily protein  | -1.20696          |
| AT3G52450 | PUB22 plant U-box 22                   | -1.20116          |
| AT3G06370 | NHX4, ATNHX4 sodium hydrogen excl      | -1.17723          |
| AT1G65390 | ATPP2-A5, PP2-A5 phloem protein 2 A    | -1.15905          |
| AT5G19875 | CONTAINS InterPro DOMAIN/s: Ubiqu      | -1.15513          |
| AT3G27060 | VQ motif-containing protein            | -1.12539          |
| AT1G71930 | ----                                   | -1.11131          |
| AT1G26945 | KDR basic helix-loop-helix (bHLH) DNA  | -1.11031          |

|           |                                      |          |
|-----------|--------------------------------------|----------|
| AT1G02930 | ATGSTF6, GST1, ERD11, ATGSTF3, GST   | -1.09333 |
| AT5G04530 | KCS19 3-ketoacyl-CoA synthase 19     | -1.08518 |
| AT1G22690 | Gibberellin-regulated family protein | -1.07635 |
| AT4G25420 | GA5, GA20OX1, AT2301, ATGA20OX1      | -1.07537 |
| AT5G47800 | Phototropic-responsive NPH3 family p | -1.07091 |
| AT1G65060 | 4CL3 4-coumarate:CoA ligase 3        | -1.05677 |
| AT2G44080 | ARL ARGOS-like                       | -1.05518 |
| AT3G25010 | AtRLP41, RLP41 receptor like protein | -1.04377 |
| AT3G55990 | ESK1, TBL29 Plant protein of unknowr | -1.01225 |
| AT4G29140 | MATE efflux family protein           | -1.00247 |

[GO Accession: GO:0042221](#)

**Ontology:** Biological Process

**Description:** response to chemical stimulus

**Annotated/Total number in query list:** 26/322

**Annotated/Total number in background/reference:** 439/31819

| ID        | Description                        | log2(fold_change) |
|-----------|------------------------------------|-------------------|
| AT5G59845 | Gibberellin-regulated family prote | -3.2326           |
| AT3G59900 | ARGOS auxin-regulated gene invo    | -3.22481          |
| AT2G14610 | PR1, PR 1, ATPR1 pathogenesis-re   | -2.40485          |
| AT3G16670 | Pollen Ole e 1 allergen and        | -2.38297          |
| AT5G51890 | Peroxidase superfamily protein     | -2.0227           |
| AT1G19840 | SAUR-like auxin-responsive prote   | -1.84963          |
| AT4G08950 | EXO Phosphate-responsive 1 fami    | -1.74198          |
| AT4G36410 | UBC17 ubiquitin-conjugating enzy   | -1.6778           |
| AT5G15180 | Peroxidase superfamily protein     | -1.5499           |
| AT4G23550 | WRKY29, ATWRKY29 WRKY family       | -1.48748          |
| AT3G18485 | ILR2 iaa-leucine resistant 2       | -1.42713          |
| AT2G29130 | LAC2, ATLAC2 laccase 2             | -1.37506          |
| AT1G14540 | Peroxidase superfamily protein     | -1.35362          |
| AT5G67450 | AZF1, ZF1 zinc-finger protein 1    | -1.32776          |
| AT2G33710 | Integrase-type DNA-binding supe    | -1.28413          |
| AT4G18780 | CESA8, IRX1, ATCESA8, LEW2 cellu   | -1.28274          |
| AT2G04070 | MATE efflux family protein         | -1.23187          |
| AT3G52450 | PUB22 plant U-box 22               | -1.20116          |
| AT5G19875 | CONTAINS InterPro DOMAIN/s: U      | -1.15513          |
| AT1G71930 | ----                               | -1.11131          |
| AT1G02930 | ATGSTF6, GST1, ERD11, ATGSTF3,     | -1.09333          |
| AT1G22690 | Gibberellin-regulated family prote | -1.07635          |
| AT4G25420 | GA5, GA20OX1, AT2301, ATGA20       | -1.07537          |
| AT2G44080 | ARL ARGOS-like                     | -1.05518          |
| AT3G55990 | ESK1, TBL29 Plant protein of unkr  | -1.01225          |
| AT4G29140 | MATE efflux family protein         | -1.00247          |

1

[GO Accession: GO:0006950](#)

**Ontology:** Biological Process

**Description:** response to stress

**Annotated/Total number in query list:** 22/322

**Annotated/Total number in background/reference:** 456/31819

| ID        | Description                     | log2(fold_change) |
|-----------|---------------------------------|-------------------|
| AT2G14610 | PR1, PR 1, ATPR1 pathogenesis   | -2.40485          |
| AT3G16670 | Pollen Ole e 1 allergen and     | -2.38297          |
| AT4G16260 | Glycosyl hydrolase superfamily  | -2.36978          |
| AT5G51890 | Peroxidase superfamily protein  | -2.0227           |
| AT5G20630 | GLP3, GLP3A, GLP3B, ATGER3, I   | -1.87719          |
| AT5G23400 | Leucine-rich repeat (LRR) famil | -1.74694          |
| AT1G65870 | Disease resistance-responsive ( | -1.73882          |
| AT5G15180 | Peroxidase superfamily protein  | -1.5499           |
| AT2G29130 | LAC2, ATLAC2 laccase 2          | -1.37506          |
| AT1G14540 | Peroxidase superfamily protein  | -1.35362          |
| AT5G67450 | AZF1, ZF1 zinc-finger protein 1 | -1.32776          |
| AT4G18780 | CESA8, IRX1, ATCESA8, LEW2 c    | -1.28274          |
| AT3G52450 | PUB22 plant U-box 22            | -1.20116          |
| AT3G06370 | NHX4, ATNHX4 sodium hydrog      | -1.17723          |
| AT1G65390 | ATPP2-A5, PP2-A5 phloem prot    | -1.15905          |
| AT5G19875 | CONTAINS InterPro DOMAIN/s:     | -1.15513          |
| AT3G27060 | VQ motif-containing protein     | -1.12539          |
| AT1G02930 | ATGSTF6, GST1, ERD11, ATGSTI    | -1.09333          |
| AT5G04530 | KCS19 3-ketoacyl-CoA synthase   | -1.08518          |
| AT1G65060 | 4CL3 4-coumarate:CoA ligase 3   | -1.05677          |
| AT3G25010 | AtRLP41, RLP41 receptor like p  | -1.04377          |
| AT3G55990 | ESK1, TBL29 Plant protein of ur | -1.01225          |
