# Supplementary material for: Mechanisms underlying the enhanced biomass and abiotic stress tolerance phenotype of an Arabidopsis MIOX over‐expresser
Source: PubMed Central journal article supplement — Plant Direct. 2019 Sep 2;3(9):e00165. doi: 10.1002/pld3.165 (PMC6718051; doi:10.1002/pld3.165), 2019-09-02
Supplement: PLD3-3-e00165-s007.pdf [file PLD3-3-e00165-s007.pdf]

| <b>Genes</b>        | <b>Sequences</b>                                           |
|---------------------|------------------------------------------------------------|
| qMIOX4              | GCCATCCGCAAAGATTACCCTAATG<br>CCGTGTGCAAAGGGTAAAAGGAA       |
| qYUCCA3             | GAGCCGGTGGTACCTAGGTTTGAG<br>GGACAGCCCAAAGTTGAAGTACCC       |
| qNIT2               | AAAACACTCCGTTTAATGGCGTTGC<br>GGCCAACCTCCGCCAACTTTTCTA      |
| qILL5               | GACATGACGCTCACACTACGATGC<br>GCCTCTCGTGAAACGAGGTGTTG        |
| qPSBA               | CACTTGTATGGTCTGGGGAGGCTTA<br>CCTTGAGCAGACCCACGTT           |
| qNAM                | TCGACGGAAGGACAAAGAGTTGG<br>GATGCGGTTTGGGTTAGAAAAGTGG       |
| qCOR15a             | AGTCGGCCAGAAAAGTCAAGTTTCG<br>TCGCTTTCTCACCATCTGCTAATGC     |
| qRAP2.6             | TGCCTCCTCAACCATTGATTACCG<br>ATGGTTGTTGTTGCTCCATACATCG      |
| qVSP2               | CAATACGACTCCAAAACCGTGTGC<br>TCGGTCTTCTCTGTTCCGTATCCA       |
| qOPR3               | CAGGGCGTTGAACGGAGTACCA<br>AAACTCGCCACCTGTTTTCCGAGAT        |
| qMYB29              | TTCCCCAAAAGCTGGACTAAAACG<br>TCACGGGATCGATTCCCTTATCG        |
| qLAC2               | TGTGGTGGCATGCTCATATTCAGTG<br>AATGGACCTGGGAGCCCATAAAAG      |
| qPollen-O- allergen | GGCTAACGCTCAGAGTGGTCTTGG<br>AGGGGTTGGGACGACGATACGA         |
| q $\alpha$ -Amylase | GCAGCGAAACCATTATTCTCGGTTG<br>CTTGAAGGCCACCATCCCATTACA      |
| qAPX5               | TCTGCGAGGAAGTAAAGGCTAAGCA<br>GCATCCTTACGGCCTGGTGTAAATG     |
| qGRX480             | CAACCGTCGGGGAATCTCTG<br>ATCTCAAGGACCGCCGGAT                |
| qPlant invertase    | TCCATCCGACGCCTATGGTT<br>GGCGACTTGCTCTTCTTCGTA              |
| qARGOs              | CGGCGCAGAAAAGGATGATG<br>AGGTAACGGCGGCAAACTA                |
| qUbiquitin          | GGCCTTGATAATCCCTGATGAATAAG<br>AAAGAGATAACAGGAACGGAAACATAGT |
| qActin              | CACCATTGGGTCTGAGCGAT                                       |

*qActin*

GGGCGACAACCTTGATCTTC

*qActin*

TTGCTGACAGGATGAGCAAG

TGGAATGTGCTGAGAGATGC

*MIOX4*

GAGATGAATGCATTTGGCCG

TTTATCTAATTTTCCATATTCAGCCC

*R2D2*

TAGTTGGAATAGGATTTCCCGG

AGTATGGAGTTGGATTTCCCTC
